# Supplementary material for: Determinism and Contingency Shape Metabolic Complementation in an Endosymbiotic Consortium
Source: Front Microbiol. 2017 Nov 22;8:2290. doi: 10.3389/fmicb.2017.02290 (PMC5702781; doi:10.3389/fmicb.2017.02290)
Supplement: Supplementary Table S1 — Genome-scale metabolic model of Serratia symbiotica SCc iSCc236. The spreadsheet in XLS format includes the iSCc236 model description. It contains three tables: one that corresponds to the reactions; the second includes exchange fluxes; and in the third is the information of the metabolites. [file Table1.XLSX]

## Sheet: Reactions
R_ID	Name	Reaction formula	E.C. Number	Subsystem	LB	UB	Gene_reaction_rule
4AMPMt	4AMPM_putative_transport	4ampm_e <=> 4ampm_c		Transport, Extracellular	-1000	1000	SCc_ORPHAN
4PASPt	4-Phospho-L-aspartate_putative_transporter	4pasp_e <=> 4pasp_c		Transport, Extracellular	-1000	1000	SCc_ORPHAN
8AONNt	8-Amino-7-oxononanoate reversible transport via proton symport	8aonn_e <=> 8aonn_c		Transport, Extracellular	-1000	1000	SCc_ORPHAN
A5PISO	arabinose-5-phosphate isomerase	ru5p_D_c <=> ara5p_c	5.3.1.13	Alternate Carbon Metabolism	-1000	1000	(SCc_610)
ACCOACr	acetyl-CoA carboxylase, reversible reaction	accoa_c + atp_c + hco3_c <=> adp_c + h_c + malcoa_c + pi_c	6.4.1.2	Membrane Lipid Metabolism	-1000	1000	(SCc_220 and SCc_738 and SCc_737 and SCc_493)
ACKr	acetate kinase	ac_c + atp_c <=> actp_c + adp_c	2.7.2.1	Pyruvate Metabolism	-1000	1000	(SCc_499)
ACOATA	Acetyl-CoA ACP transacylase	ACP_c + accoa_c <=> acACP_c + coa_c	2.3.1.38	Membrane Lipid Metabolism	-1000	1000	(SCc_433)
ACt	acetate_putative_transport	ac_e <=> ac_c		Transport, Extracellular	-1000	1000	SCc_ORPHAN
ADCL	4-aminobenzoate synthase	4adcho_c --> 4abz_c + h_c + pyr_c	4.1.3.38	Cofactor and Prosthetic Group Biosynthesis	0	1000	SCc_438
ADCS	4_amino_4_deoxychorismate_synthase	chor_c + gln_L_c --> 4adcho_c + glu_L_c	2.6.1.85	Cofactor and Prosthetic Group Biosynthesis	0	1000	SCc_516
ADK1	adenylate kinase	amp_c + atp_c <=> 2.0 adp_c	2.7.4.3	Nucleotide Salvage Pathway	-1000	1000	(SCc_364)
ADSK	adenylyl-sulfate kinase	aps_c + atp_c --> adp_c + h_c + paps_c	2.7.1.25	Cysteine Metabolism	0	1000	(SCc_160)
ADSL1r	adenylsuccinate lyase	dcamp_c <=> amp_c + fum_c	4.3.2.2	Purine and Pyrimidine Biosynthesis	-1000	1000	(SCc_406)
ADSS	adenylosuccinate synthase	asp_L_c + gtp_c + imp_c --> dcamp_c + gdp_c + 2.0 h_c + pi_c	6.3.4.4	Purine and Pyrimidine Biosynthesis	0	1000	(SCc_087)
AGMHE	ADP-D-glycero-D-manno-heptose epimerase	adphep_DD_c --> adphep_LD_c	5.1.3.20	Cell Envelope Biosynthesis	0	1000	(SCc_043)
AHCYSt	Adenosyl-homocysteine_putative_transporter	ahcys_e <=> ahcys_c		Transport, Extracellular	-1000	1000	SCc_ORPHAN
AKGt	2-oxoglutarate reversible transport via symport	akg_e <=> akg_c		Transport, Extracellular	-1000	1000	SCc_ORPHAN
ALAALAr	D-alanine-D-alanine ligase (reversible)	2.0 ala_D_c + atp_c <=> adp_c + alaala_c + h_c + pi_c	6.3.2.4	Cell Envelope Biosynthesis	-1000	1000	(SCc_139)
ALAt	L-alanine reversible transport via proton symport	ala_L_e + h_e <=> ala_L_c + h_c		Transport, Extracellular	-1000	1000	(SCc_361)
AMAOTr	adenosylmethionine-8-amino-7-oxononanoate transaminase	8aonn_c + amet_c <=> amob_c + dann_c	2.6.1.62	Cofactor and Prosthetic Group Biosynthesis	-1000	1000	(SCc_554)
AMETt	S-Adenosyl-L-methionine_putative_transporter	amet_e <=> amet_c		Transport, Extracellular	-1000	1000	SCc_ORPHAN
AMOBt	S-Adenosyl-4-methylthio-2-oxobutanoate_putative_transporter	amob_e <=> amob_c		Transport, Extracellular	-1000	1000	SCc_ORPHAN
AMPMS2	4_amino_2_methyl_5_phosphomethylpyrimidine_synthetase	air_c + h2o_c + nad_c --> 4ampm_c + 2.0 for_c + 3.0 h_c + nadh_c		Cofactor and Prosthetic Group Biosynthesis	0	1000	SCc_720
AMPt	AMP_putative_transporter	amp_e <=> amp_c		Transport, Extracellular	-1000	1000	SCc_ORPHAN
ANPRT	anthranilate phosphoribosyltransferase	anth_c + prpp_c --> ppi_c + pran_c	2.4.2.18	Tyrosine, Tryptophan, and Phenylalanine Metabolism	0	1000	(SCc_377)
ANTHt	anthranilate_putative_transport	anth_e <=> anth_c		Transport, Extracellular	-1000	1000	SCc_ORPHAN
APRAUR	5-amino-6-(5-phosphoribosylamino)uracil reductase	5apru_c + h_c + nadph_c --> 5aprbu_c + nadp_c	1.1.1.193	Cofactor and Prosthetic Group Biosynthesis	0	1000	(SCc_468)
ARGt	L-arginine reversible transport via proton symport	arg_L_e + h_e <=> arg_L_c + h_c		Transport, Extracellular	-1000	1000	(SCc_625)
ASAD	aspartate-semialdehyde dehydrogenase	aspsa_c + nadp_c + pi_c <=> 4pasp_c + h_c + nadph_c	1.2.1.11	Threonine and Lysine Metabolism	-1000	1000	(SCc_627)
ASNN	L-asparaginase	asn_L_c + h2o_c --> asp_L_c + nh4_c	3.5.1.1	Alanine and Aspartate Metabolism	0	1000	(SCc_449)
ASNt	L-asparagine reversible transport via proton symport	asn_L_e + h_e <=> asn_L_c + h_c		Transport, Extracellular	-1000	1000	(SCc_548)
ASPCT	aspartate carbamoyltransferase	asp_L_c + cbp_c --> cbasp_c + h_c + pi_c	2.1.3.2	Purine and Pyrimidine Biosynthesis	0	1000	(SCc_770)
ASPt2	L-aspartate transport in via proton symport	asp_L_e + 2.0 h_e --> asp_L_c + 2.0 h_c		Transport, Extracellular	0	1000	(SCc_075)
ATPM	ATP maintenance requirement	atp_c + h2o_c --> adp_c + h_c + pi_c		Transport, Extracellular	0	1000	SPONTANEOUS
ATPS4r	ATP synthase (four protons for one ATP)	adp_c + 4.0 h_e + pi_c <=> atp_c + h2o_c + 3.0 h_c	3.6.3.14	Oxidative Phosphorylation	-1000	1000	((SCc_002 and SCc_003 and SCc_001) and (SCc_004 and SCc_005 and SCc_006 and SCc_007 and SCc_008))
BPNT	3,5-bisphosphate nucleotidase	h2o_c + pap_c --> amp_c + pi_c	3.1.3.7	Cysteine Metabolism	0	1000	SCc_094
BTNt	Biotin_putative_transporter	btn_e <=> btn_c		Transport, Extracellular	-1000	1000	SCc_ORPHAN
BTS5	Biotin synthase	amet_c + dtbt_c + h2s_c --> btn_c + dad_5_c + 3.0 h_c + met_L_c	2.8.1.6	Cofactor and Prosthetic Group Biosynthesis	0	1000	(SCc_553)
C120SN	Fatty acid biosynthesis (n-C12:0)	actACP_c + 14.0 h_c + 4.0 malACP_c + 10.0 nadph_c --> 4.0 ACP_c + 4.0 co2_c + ddcaACP_c + 5.0 h2o_c + 10.0 nadp_c		Membrane Lipid Metabolism	0	1000	((SCc_216) and (SCc_437) and (SCc_435)) or ((SCc_616) and (SCc_216) and (SCc_435)) or ((SCc_616) and (SCc_503) and (SCc_435)) or ((SCc_503) and (SCc_437) and (SCc_435))
C140SN	Fatty acid biosynthesis (n-C14:0)	actACP_c + 17.0 h_c + 5.0 malACP_c + 12.0 nadph_c --> 5.0 ACP_c + 5.0 co2_c + 6.0 h2o_c + myrsACP_c + 12.0 nadp_c		Membrane Lipid Metabolism	0	1000	((SCc_216) and (SCc_616) and (SCc_435)) or ((SCc_616) and (SCc_503) and (SCc_435)) or ((SCc_503) and (SCc_437) and (SCc_435)) or ((SCc_216) and (SCc_437) and (SCc_435))
C141SN	Fatty acid biosynthesis (n-C14:1)	actACP_c + 16.0 h_c + 5.0 malACP_c + 11.0 nadph_c --> 5.0 ACP_c + 5.0 co2_c + 6.0 h2o_c + 11.0 nadp_c + tdeACP_c		Membrane Lipid Metabolism	0	1000	((SCc_616) and (SCc_216) and (SCc_503) and (SCc_435))
C160SN	Fatty acid biosynthesis (n-C16:0)	actACP_c + 20.0 h_c + 6.0 malACP_c + 14.0 nadph_c --> 6.0 ACP_c + 6.0 co2_c + 7.0 h2o_c + 14.0 nadp_c + palmACP_c		Membrane Lipid Metabolism	0	1000	((SCc_216) and (SCc_437) and (SCc_435)) or ((SCc_616) and (SCc_216) and (SCc_435)) or ((SCc_616) and (SCc_503) and (SCc_435)) or ((SCc_503) and (SCc_437) and (SCc_435))
C161SN	Fatty acid biosynthesis (n-C16:1)	actACP_c + 19.0 h_c + 6.0 malACP_c + 13.0 nadph_c --> 6.0 ACP_c + 6.0 co2_c + 7.0 h2o_c + hdeACP_c + 13.0 nadp_c		Membrane Lipid Metabolism	0	1000	((SCc_616) and (SCc_216) and (SCc_503) and (SCc_435))
C181SN	Fatty acid biosynthesis (n-C18:1)	actACP_c + 22.0 h_c + 7.0 malACP_c + 15.0 nadph_c --> 7.0 ACP_c + 7.0 co2_c + 8.0 h2o_c + 15.0 nadp_c + octeACP_c		Membrane Lipid Metabolism	0	1000	((SCc_616) and (SCc_216) and (SCc_503) and (SCc_437) and (SCc_435))
CBPS	carbamoyl-phosphate synthase (glutamine-hydrolysing)	2.0 atp_c + gln_L_c + h2o_c + hco3_c --> 2.0 adp_c + cbp_c + glu_L_c + 2.0 h_c + pi_c	6.3.5.5	Arginine and Proline Metabolism	0	1000	(SCc_116 and SCc_117)
CDPMEK	4-(cytidine 5-diphospho)-2-C-methyl-D-erythritol kinase	4c2me_c + atp_c --> 2p4c2me_c + adp_c + h_c		Cofactor and Prosthetic Group Biosynthesis	0	1000	(SCc_418)
CHORS	chorismate_synthase	3psme_c --> chor_c + pi_c	4.2.3.5	S_Tyrosine__Tryptophan__and_Phenylalanine_Metabolism	0	1000	( SCc_617 )
CLPNS_SCc	Cardiolipin Synthase (SCc)	0.04 pg_SCc_c <=> 0.02 clpn_SCc_c + glyc_c	2.7.8.-	Membrane Lipid Metabolism	-1000	1000	(SCc_338)
CO2t	CO2 transporter via diffusion	co2_e <=> co2_c		Transport, Extracellular	-1000	1000	(SPONTANEOUS)
CPPPGO	coproporphyrinogen oxidase (O2 required)	cpppg3_c + 2.0 h_c + o2_c --> 2.0 co2_c + 2.0 h2o_c + pppg9_c	1.3.3.3	Cofactor and Prosthetic Group Biosynthesis	0	1000	(SCc_333)
CTPS2	CTP synthase (glutamine)	atp_c + gln_L_c + h2o_c + utp_c --> adp_c + ctp_c + glu_L_c + 2.0 h_c + pi_c	6.3.4.2	Purine and Pyrimidine Biosynthesis	0	1000	(SCc_149)
CTPt	CTP_putative_transporter	ctp_e <=> ctp_c		Transport, Extracellular	-1000	1000	SCc_ORPHAN
CYSS	cysteine synthase	acser_c + h2s_c --> ac_c + cys_L_c + h_c		Cysteine Metabolism	0	1000	(SCc_313)
CYSt	L-cysteine_putative_transporter	cys_L_e <=> cys_L_c		Transport, Extracellular	-1000	1000	SCc_ORPHAN
CYTBO3	cytochrome oxidase bo3	2.5 h_c + 0.5 o2_c + q8h2_c --> h2o_c + 2.5 h_e + q8_c		Oxidative Phosphorylation	0	1000	(SCc_479 and SCc_478 and SCc_476 and SCc_477)
CYTK1	cytidylate kinase (CMP)	atp_c + cmp_c <=> adp_c + cdp_c	2.7.4.14	Nucleotide Salvage Pathway	-1000	1000	(SCc_514)
DAD5t	5_Deoxyadenosine_putative_transport	dad_5_e <=> dad_5_c		Transport, Extracellular	-1000	1000	SCc_ORPHAN
DAGK_SCc	Diacylglycerol kinase	0.02 12dgr_SCc_c + atp_c --> adp_c + h_c + 0.02 pa_SCc_c	2.7.1.107	Cell Envelope Biosynthesis	0	1000	SCc_ORPHAN
DALAt	D-alanine transport via proton symport	ala_D_e + h_e <=> ala_D_c + h_c		Transport, Extracellular	-1000	1000	(SCc_361)
DAPE	diaminopimelate epimerase	26dap_LL_c <=> 26dap_M_c	5.1.1.7	Threonine and Lysine Metabolism	-1000	1000	(SCc_682)
DASYN_SCc	CDP-Diacylglycerol synthetase (SCc)	ctp_c + h_c + 0.02 pa_SCc_c --> 0.02 cdpdag_SCc_c + ppi_c	2.7.7.41	Membrane Lipid Metabolism	0	1000	(SCc_211)
dATPt	dATP_putative_transporter	datp_e <=> datp_c		Transport, Extracellular	-1000	1000	SCc_ORPHAN
DB4PS	3,4-Dihydroxy-2-butanone-4-phosphate synthase	ru5p_D_c --> db4p_c + for_c + h_c	4.1.99.12	Cofactor and Prosthetic Group Biosynthesis	0	1000	(SCc_596)
DBTSr	dethiobiotin synthase	atp_c + co2_c + dann_c <=> adp_c + dtbt_c + 3.0 h_c + pi_c	6.3.3.3	Cofactor and Prosthetic Group Biosynthesis	-1000	1000	(SCc_552)
DCTPD	dCTP_deaminase	dctp_c + h2o_c + h_c --> dutp_c + nh4_c	3.5.4.13	S_Nucleotide_Salvage_Pathway	0	1000	(SCc_536)
dCTPt	dCTP_putative_transporter	dctp_e <=> dctp_c		Transport, Extracellular	-1000	1000	SCc_ORPHAN
dGTPt	dGTP_putative_transporter	dgtp_e <=> dgtp_c		Transport, Extracellular	-1000	1000	SCc_ORPHAN
DHDPRy	dihydrodipicolinate reductase (NADPH)	23dhdp_c + h_c + nadph_c --> nadp_c + thdp_c	1.17.1.8	Threonine and Lysine Metabolism	0	1000	(SCc_115)
DHDPS	dihydrodipicolinate synthase	aspsa_c + pyr_c --> 23dhdp_c + 2.0 h2o_c + h_c	4.2.1.52	Threonine and Lysine Metabolism	0	1000	(SCc_305)
DHFR	dihydrofolate reductase	dhf_c + h_c + nadph_c <=> nadp_c + thf_c	1.5.1.3	Cofactor and Prosthetic Group Biosynthesis	-1000	1000	(SCc_118)
DHFS	dihydrofolate synthase	atp_c + dhpt_c + glu_L_c --> adp_c + dhf_c + h_c + pi_c	6.3.2.12	Cofactor and Prosthetic Group Biosynthesis	0	1000	(SCc_494)
DHNPA2	dihydroneopterin aldolase	dhnpt_c --> 6hmhpt_c + gcald_c	4.1.2.25	Cofactor and Prosthetic Group Biosynthesis	0	1000	SCc_ORPHAN
DHORD2	dihydoorotic acid dehydrogenase (quinone8)	dhor_S_c + q8_c --> orot_c + q8h2_c	1.3.3.2	Purine and Pyrimidine Biosynthesis	0	1000	(SCc_504)
DHORTS	dihydroorotase	dhor_S_c + h2o_c <=> cbasp_c + h_c	3.5.2.3	Purine and Pyrimidine Biosynthesis	-1000	1000	(SCc_428)
DHPPDA2	diaminohydroxyphosphoribosylaminopryrimidine deaminase (25drapp)	25drapp_c + h2o_c + h_c --> 5apru_c + nh4_c	3.5.4.26	Cofactor and Prosthetic Group Biosynthesis	0	1000	(SCc_468)
DHPS2	dihydropteroate synthase	4abz_c + 6hmhptpp_c --> dhpt_c + ppi_c		Cofactor and Prosthetic Group Biosynthesis	0	1000	(SCc_061)
DMATT	dimethylallyltranstransferase	dmpp_c + ipdp_c --> grdp_c + ppi_c	2.5.1.1	Cofactor and Prosthetic Group Biosynthesis	0	1000	(SCc_474)
DMPPS	1-hydroxy-2-methyl-2-(E)-butenyl 4-diphosphate reductase (dmpp)	h2mb4p_c + h_c + nadh_c --> dmpp_c + h2o_c + nad_c		Cofactor and Prosthetic Group Biosynthesis	0	1000	(SCc_114)
DNMPPA	Dihydroneopterin monophosphate dephosphorylase	dhpmp_c + h2o_c --> dhnpt_c + pi_c	3.6.1.	Cofactor and Prosthetic Group Biosynthesis	0	1000	SCc_ORPHAN
DNTPPA	Dihydroneopterin triphosphate pyrophosphatase	ahdt_c + h2o_c --> dhpmp_c + h_c + ppi_c	3.6.1.37	Cofactor and Prosthetic Group Biosynthesis	0	1000	SCc_ORPHAN
DPCOAK	dephospho-CoA kinase	atp_c + dpcoa_c --> adp_c + coa_c + h_c	2.7.1.24	Cofactor and Prosthetic Group Biosynthesis	0	1000	(SCc_146)
DTMPK	dTMP kinase	atp_c + dtmp_c <=> adp_c + dtdp_c	2.7.4.9	Nucleotide Salvage Pathway	-1000	1000	(SCc_439)
dTTPt	dTTP_putative_transporter	dttp_e <=> dttp_c		Transport, Extracellular	-1000	1000	SCc_ORPHAN
DUTPDP	dUTP_diphosphatase	dutp_c + h2o_c --> dump_c + h_c + ppi_c	3.6.1.23	S_Nucleotide_Salvage_Pathway	0	1000	(SCc_028)
DXPRIi	1-deoxy-D-xylulose reductoisomerase	dxyl5p_c + h_c + nadph_c --> 2me4p_c + nadp_c		Cofactor and Prosthetic Group Biosynthesis	0	1000	(SCc_209)
DXPS	1-deoxy-D-xylulose 5-phosphate synthase	g3p_c + h_c + pyr_c --> co2_c + dxyl5p_c		Cofactor and Prosthetic Group Biosynthesis	0	1000	(SCc_473)
E4PD	Erythrose 4-phosphate dehydrogenase	e4p_c + h2o_c + nad_c <=> 4per_c + 2.0 h_c + nadh_c		Cofactor and Prosthetic Group Biosynthesis	-1000	1000	(SCc_448)
EDTXS1	Endotoxin Synthesis (lauroyl transferase)	ddcaACP_c + kdo2lipid4_c --> ACP_c + kdo2lipid4L_c	2.3.1.241	Cell Envelope Biosynthesis	0	1000	(SCc_322)
EDTXS2	Endotoxin Synthesis (myristoyl transferase)	kdo2lipid4L_c + myrsACP_c --> ACP_c + lipa_c	2.3.1.243	Cell Envelope Biosynthesis	0	1000	(SCc_322)
ENO	enolase	2pg_c <=> h2o_c + pep_c	4.2.1.11	Glycolysis/Gluconeogenesis	-1000	1000	(SCc_150)
FADt	fad_putative_transporter	fad_e <=> fad_c		Transport, Extracellular	-1000	1000	SCc_ORPHAN
FBA	fructose-bisphosphate aldolase	fdp_c <=> dhap_c + g3p_c	4.1.2.13	Glycolysis/Gluconeogenesis	-1000	1000	(SCc_186)
FCLT	Ferrochelatase	fe2_c + ppp9_c --> 2.0 h_c + pheme_c	4.99.1.1	Cofactor and Prosthetic Group Biosynthesis	0	1000	(SCc_363)
FE2abc	iron (II) transport via ABC system	atp_c + fe2_e + h2o_c --> adp_c + fe2_c + h_c + pi_c		Transport, Extracellular	0	1000	(SCc_629 and SCc_630)
FMNAT	FMN adenylyltransferase	atp_c + fmn_c + h_c --> fad_c + ppi_c	2.7.7.2	Cofactor and Prosthetic Group Biosynthesis	0	1000	(SCc_111)
FMNt	FMN_putative_transporter	fmn_e <=> fmn_c		Transport, Extracellular	-1000	1000	SCc_ORPHAN
FORt	formate transport via diffusion	for_e <=> for_c		Transport, Extracellular	-1000	1000	(SPONTANEOUS)
FRUK	fructose-1-phosphate kinase	atp_c + f1p_c --> adp_c + fdp_c + h_c	2.7.1.56	Alternate Carbon Metabolism	0	1000	(SCc_621)
FRUpts	D-fructose transport via PEP:Pyr PTS	fru_e + pep_c --> f1p_c + pyr_c		Transport, Extracellular	0	1000	((SCc_312) and (SCc_311) and (SCc_622) and (SCc_620))
FUMt2_2	Fumarate transport via proton symport (2 H)	fum_e + 2.0 h_e <=> fum_c + 2.0 h_c		Transport, Extracellular	-1000	1000	(SCc_075)
G1PACT	glucosamine-1-phosphate N-acetyltransferase	accoa_c + gam1p_c --> acgam1p_c + coa_c + h_c	2.3.1.157	Cell Envelope Biosynthesis	0	1000	(SCc_009)
G3PD2	glycerol-3-phosphate dehydrogenase (NADP)	glyc3p_c + nadp_c <=> dhap_c + h_c + nadph_c	1.1.1.94	Alternate Carbon Metabolism	-1000	1000	(SCc_038)
G6PDH2r	glucose 6-phosphate dehydrogenase	g6p_c + nadp_c <=> 6pgl_c + h_c + nadph_c	1.1.1.49	Pentose Phosphate Pathway	-1000	1000	(SCc_354)
GALU	UTP-glucose-1-phosphate uridylyltransferase	g1p_c + h_c + utp_c <=> ppi_c + udpg_c	2.7.7.9	Alternate Carbon Metabolism	-1000	1000	(SCc_334)
GAPD	glyceraldehyde-3-phosphate dehydrogenase	g3p_c + nad_c + pi_c <=> 13dpg_c + h_c + nadh_c	1.2.1.12	Glycolysis/Gluconeogenesis	-1000	1000	(SCc_448)
GARFT	phosphoribosylglycinamide formyltransferase	10fthf_c + gar_c <=> fgam_c + h_c + thf_c	2.1.2.2	Purine and Pyrimidine Biosynthesis	-1000	1000	(SCc_302)
GCALDt	glycolaldehyde_putative_transport	gcald_e <=> gcald_c		Transport, Extracellular	-1000	1000	SCc_ORPHAN
GF6PTA	glutamine-fructose-6-phosphate transaminase	f6p_c + gln_L_c --> gam6p_c + glu_L_c	2.6.1.16	Cell Envelope Biosynthesis	0	1000	(SCc_010)
GHMT2	glycine hydroxymethyltransferase	ser_L_c + thf_c <=> gly_c + h2o_c + mlthf_c	2.1.2.1	Glycine and Serine Metabolism	-1000	1000	(SCc_568)
GK1	guanylate kinase (GMP:ATP)	atp_c + gmp_c <=> adp_c + gdp_c	2.7.4.8	Nucleotide Salvage Pathway	-1000	1000	(SCc_762)
GLCpts	D-glucose transport via PEP:Pyr PTS	glc_D_e + pep_c --> g6p_c + pyr_c		Transport, Extracellular	0	1000	(SCc_312 and SCc_311 and SCc_442 and SCc_614)
GLNabc	L-glutamine transport via ABC system	atp_c + gln_L_e + h2o_c --> adp_c + gln_L_c + h_c + pi_c		Transport, Extracellular	0	1000	((SCc_544) and (SCc_543) and (SCc_545))
GLUCYS	gamma-glutamylcysteine synthetase	atp_c + cys_L_c + glu_L_c --> adp_c + glucys_c + h_c + pi_c	6.3.2.2	Cofactor and Prosthetic Group Biosynthesis	0	1000	(SCc_171)
GLUPRT	glutamine phosphoribosyldiphosphate amidotransferase	gln_L_c + h2o_c + prpp_c --> glu_L_c + ppi_c + pram_c	2.4.2.14	Purine and Pyrimidine Biosynthesis	0	1000	(SCc_497)
GLUR	glutamate racemase	glu_D_c <=> glu_L_c	5.1.1.3	Cell Envelope Biosynthesis	-1000	1000	(SCc_768)
GLUt	L-glutamate transport via proton symport, reversible	glu_L_e + 2.0 h_e <=> glu_L_c + 2.0 h_c		Transport, Extracellular	-1000	1000	(SCc_075)
GLYCt	glycerol_putative_transport	glyc_e <=> glyc_c		Transport, Extracellular	-1000	1000	SCc_ORPHAN
GLYt	glycine reversible transport via proton symport	gly_e + h_e <=> gly_c + h_c		Transport, Extracellular	-1000	1000	(SCc_361)
GMHEPAT	D-glycero-D-manno-hepose 1-phosphate adenyltransferase	atp_c + gmhep1p_c + h_c --> adphep_DD_c + ppi_c		Cell Envelope Biosynthesis	0	1000	(SCc_595)
GMHEPK	D-glycero-D-manno-heptose 7-phosphate kinase	atp_c + gmhep7p_c --> adp_c + gmhep17bp_c + h_c		Cell Envelope Biosynthesis	0	1000	(SCc_595)
GMHEPPA	D-glycero-D-manno-heptose 1,7-bisphosphate phosphatase	gmhep17bp_c + h2o_c --> gmhep1p_c + pi_c		Cell Envelope Biosynthesis	0	1000	(SCc_224)
GMPS2	GMP synthase	atp_c + gln_L_c + h2o_c + xmp_c --> amp_c + glu_L_c + gmp_c + 2.0 h_c + ppi_c	6.3.5.2	Purine and Pyrimidine Biosynthesis	0	1000	(SCc_555)
GND	phosphogluconate dehydrogenase	6pgc_c + nadp_c --> co2_c + nadph_c + ru5p_D_c	1.1.1.44	Pentose Phosphate Pathway	0	1000	(SCc_529)
GRTT	geranyltranstransferase	grdp_c + ipdp_c --> frdp_c + ppi_c	2.5.1.10	Cofactor and Prosthetic Group Biosynthesis	0	1000	(SCc_474)
GTHRDt	glutathione_putative_transport	gthrd_e <=> gthrd_c		Transport, Extracellular	-1000	1000	SCc_ORPHAN
GTHS	glutathione synthetase	atp_c + glucys_c + gly_c --> adp_c + gthrd_c + h_c + pi_c	6.3.2.3	Cofactor and Prosthetic Group Biosynthesis	0	1000	(SCc_016)
GTPCI	GTP cyclohydrolase I	gtp_c + h2o_c --> ahdt_c + for_c + h_c	3.5.4.16	Cofactor and Prosthetic Group Biosynthesis	0	1000	(SCc_538)
GTPCII2	GTP cyclohydrolase II (25drapp)	gtp_c + 3.0 h2o_c --> 25drapp_c + for_c + 2.0 h_c + ppi_c	3.5.4.25	Cofactor and Prosthetic Group Biosynthesis	0	1000	(SCc_372)
GTPt	GTP_putative_transporter	gtp_e <=> gtp_c		Transport, Extracellular	-1000	1000	SCc_ORPHAN
H2Ot	H2O transport via diffusion	h2o_e <=> h2o_c		Transport, Extracellular	-1000	1000	(SPONTANEOUS)
H2St	H2S_putative_diffusion	h2s_e <=> h2s_c		Transport, Extracellular	-1000	1000	(SPONTANEOUS)
HCO3E	HCO3 equilibration reaction	co2_c + h2o_c <=> h_c + hco3_c	4.2.1.1	Unassigned	-1000	1000	SPONTANEOUS
HEMEOS	Heme O synthase	frdp_c + h2o_c + pheme_c --> hemeO_c + ppi_c		Cofactor and Prosthetic Group Biosynthesis	0	1000	(SCc_475)
HEMEOt	HemeO_putative_transporter	hemeO_e <=> hemeO_c		Transport, Extracellular	-1000	1000	SCc_ORPHAN
HISt	L-histidine reversible transport via proton symport	h_e + his_L_e <=> h_c + his_L_c		Transport, Extracellular	-1000	1000	(SCc_625)
HMBS	hydroxymethylbilane synthase	h2o_c + 4.0 ppbng_c --> hmbil_c + 4.0 nh4_c	4.3.1.8	Cofactor and Prosthetic Group Biosynthesis	0	1000	(SCc_681)
HPPK2	6-hydroxymethyl-dihydropterin pyrophosphokinase	6hmhpt_c + atp_c --> 6hmhptpp_c + amp_c + h_c		Cofactor and Prosthetic Group Biosynthesis	0	1000	(SCc_275)
HXPRT	hypoxanthine phosphoribosyltransferase (Hypoxanthine)	hxan_c + prpp_c --> imp_c + ppi_c	2.4.2.8	Nucleotide Salvage Pathway	0	1000	(SCc_272)
HYXNt	Hypoxanthine_putative_transport	hxan_e <=> hxan_c		Transport, Extracellular	-1000	1000	SCc_ORPHAN
IGPS	indole-3-glycerol-phosphate synthase	2cpr5p_c + h_c --> 3ig3p_c + co2_c + h2o_c	4.1.1.48	Tyrosine, Tryptophan, and Phenylalanine Metabolism	0	1000	(SCc_378)
ILEt	L-isoleucine reversible transport via proton symport	h_e + ile_L_e <=> h_c + ile_L_c		Transport, Extracellular	-1000	1000	(SCc_286)
IMPD	IMP dehydrogenase	h2o_c + imp_c + nad_c --> h_c + nadh_c + xmp_c	1.1.1.205	Purine and Pyrimidine Biosynthesis	0	1000	(SCc_556)
IPDPS	1-hydroxy-2-methyl-2-(E)-butenyl 4-diphosphate reductase (ipdp)	h2mb4p_c + h_c + nadh_c --> h2o_c + ipdp_c + nad_c		Cofactor and Prosthetic Group Biosynthesis	0	1000	(SCc_114)
K2L4ALabc	KDO(2)-lipid IV(A) with laurate transport via ABC system	atp_c + h2o_c + kdo2lipid4L_c --> adp_c + h_c + kdo2lipid4L_e + pi_c		Transport, Extracellular	0	1000	(SCc_511)
KAS14	beta-ketoacyl-ACP synthase	acACP_c + h_c + malACP_c --> ACP_c + actACP_c + co2_c	2.3.1.41	Membrane Lipid Metabolism	0	1000	(SCc_437) or (SCc_616)
KAS15	beta-ketoacyl-ACP synthase (2)	accoa_c + h_c + malACP_c --> actACP_c + co2_c + coa_c		Membrane Lipid Metabolism	0	1000	(SCc_433)
KAS16	3-hydroxy-myristoyl-ACP synthesis	ddcaACP_c + 2.0 h_c + malACP_c + nadph_c --> 3hmrsACP_c + ACP_c + co2_c + nadp_c		Membrane Lipid Metabolism	0	1000	((SCc_616) and (SCc_435)) or ((SCc_437) and (SCc_435))
KDOCT2	3-deoxy-manno-octulosonate cytidylyltransferase	ctp_c + kdo_c --> ckdo_c + ppi_c	2.7.7.38	Cell Envelope Biosynthesis	0	1000	(SCc_508)
KDOPP	3-deoxy-manno-octulosonate-8-phosphatase	h2o_c + kdo8p_c --> kdo_c + pi_c	3.1.3.45	Cell Envelope Biosynthesis	0	1000	SCc_ORPHAN
KDOPS	3-deoxy -D-manno-octulosonic -acid 8-phosphate synthase	ara5p_c + h2o_c + pep_c --> kdo8p_c + pi_c	2.5.1.55	Cell Envelope Biosynthesis	0	1000	(SCc_414)
Kt2	potassium_transport_in_via_proton_symport	h_e + k_e --> h_c + k_c		Transport, Extracellular	0	1000	(SCc_012 and SCc_069)
LEUt	L-leucine reversible transport via proton symport	h_e + leu_L_e <=> h_c + leu_L_c		Transport, Extracellular	-1000	1000	(SCc_286)
LPADSS	Lipid A disaccaride synthase	lipidX_c + u23ga_c --> h_c + lipidAds_c + udp_c	2.4.1.182	Cell Envelope Biosynthesis	0	1000	(SCc_218)
LPSSYN_SCc	Lipopolysaccharide synthesis (SCc)	3.0 adphep_LD_c + 2.0 cdpea_c + 3.0 ckdo_c + lipa_c + 2.0 udpg_c --> 3.0 adp_c + 2.0 cdp_c + 3.0 cmp_c + 10.0 h_c + lps_SCc_c + 2.0 udp_c		Cell Envelope Biosynthesis	0	1000	((SCc_101) and (SCc_047) and (SCc_045) and (SCc_044))
LYSt	L-lysine reversible transport via proton symport	h_e + lys_L_e <=> h_c + lys_L_c		Transport, Extracellular	-1000	1000	(SCc_625)
MACPD	Malonyl-ACP decarboxylase	h_c + malACP_c --> acACP_c + co2_c		Membrane Lipid Metabolism	0	1000	(SCc_616)
MCOATA	Malonyl-CoA-ACP transacylase	ACP_c + malcoa_c <=> coa_c + malACP_c	2.3.1.39	Membrane Lipid Metabolism	-1000	1000	(SCc_434 and SCc_436)
MECDPDH	2C-methyl-D-erythritol 2,4 cyclodiphosphate dehydratase	2mecdp_c + h_c --> h2mb4p_c + h2o_c		Cofactor and Prosthetic Group Biosynthesis	0	1000	(SCc_561)
MECDPS	2-C-methyl-D-erythritol 2,4-cyclodiphosphate synthase	2p4c2me_c --> 2mecdp_c + cmp_c		Cofactor and Prosthetic Group Biosynthesis	0	1000	(SCc_163)
MEPCT	2-C-methyl-D-erythritol 4-phosphate cytidylyltransferase	2me4p_c + ctp_c + h_c --> 4c2me_c + ppi_c		Cofactor and Prosthetic Group Biosynthesis	0	1000	(SCc_162)
METAT	methionine adenosyltransferase	atp_c + h2o_c + met_L_c --> amet_c + pi_c + ppi_c	2.5.1.6	Methionine Metabolism	0	1000	(SCc_278)
METt	L-methionine_putative_transport	met_L_e <=> met_L_c		Transport, Extracellular	-1000	1000	SCc_ORPHAN
MOAT	3-deoxy-D-manno-octulosonic acid transferase	ckdo_c + lipidA_c --> cmp_c + h_c + kdolipid4_c		Cell Envelope Biosynthesis	0	1000	(SCc_035)
MOAT2	3-deoxy-D-manno-octulosonic acid transferase	ckdo_c + kdolipid4_c --> cmp_c + h_c + kdo2lipid4_c		Cell Envelope Biosynthesis	0	1000	(SCc_035)
MTHFC	methenyltetrahydrofolate cyclohydrolase	h2o_c + methf_c <=> 10fthf_c + h_c	3.5.4.9	Folate Metabolism	-1000	1000	(SCc_329)
MTHFD	methylenetetrahydrofolate dehydrogenase (NADP)	mlthf_c + nadp_c <=> methf_c + nadph_c	1.5.1.5	Folate Metabolism	-1000	1000	(SCc_329)
NADH5	NADH dehydrogenase (ubiquinone-8 )	h_c + nadh_c + q8_c --> nad_c + q8h2_c	1.6.5.9	Oxidative Phosphorylation	0	1000	(SCc_445)
NADK	NAD kinase	atp_c + nad_c --> adp_c + h_c + nadp_c	2.7.1.23	Cofactor and Prosthetic Group Biosynthesis	0	1000	(SCc_241)
NADPt	NADP_putative_transporter	nadp_e <=> nadp_c		Transport, Extracellular	-1000	1000	SCc_ORPHAN
NADS1	NAD synthase (nh3)	atp_c + dnad_c + nh4_c --> amp_c + h_c + nad_c + ppi_c	6.3.1.5	Cofactor and Prosthetic Group Biosynthesis	0	1000	(SCc_569)
NADt	NAD_putative_transporter	nad_e <=> nad_c		Transport, Extracellular	-1000	1000	SCc_ORPHAN
NDPK1	nucleoside-diphosphate kinase (ATP:GDP)	atp_c + gdp_c <=> adp_c + gtp_c	2.7.4.6	Nucleotide Salvage Pathway	-1000	1000	(SCc_564)
NDPK2	nucleoside-diphosphate kinase (ATP:UDP)	atp_c + udp_c <=> adp_c + utp_c	2.7.4.6	Nucleotide Salvage Pathway	-1000	1000	(SCc_564)
NDPK3	nucleoside-diphosphate kinase (ATP:CDP)	atp_c + cdp_c <=> adp_c + ctp_c	2.7.4.6	Nucleotide Salvage Pathway	-1000	1000	(SCc_564)
NDPK4	nucleoside-diphosphate kinase (ATP:dTDP)	atp_c + dtdp_c <=> adp_c + dttp_c	2.7.4.6	Nucleotide Salvage Pathway	-1000	1000	(SCc_564)
NDPK5	nucleoside-diphosphate kinase (ATP:dGDP)	atp_c + dgdp_c <=> adp_c + dgtp_c	2.7.4.6	Nucleotide Salvage Pathway	-1000	1000	(SCc_564)
NDPK6	nucleoside_diphosphate_kinase__ATPdUDP_	atp_c + dudp_c <=> adp_c + dutp_c	2.7.4.6	S_Nucleotide_Salvage_Pathway	-1000	1000	SCc_364
NDPK7	nucleoside-diphosphate kinase (ATP:dCDP)	atp_c + dcdp_c <=> adp_c + dctp_c	2.7.4.6	Nucleotide Salvage Pathway	-1000	1000	(SCc_564)
NDPK8	nucleoside-diphosphate kinase (ATP:dADP)	atp_c + dadp_c <=> adp_c + datp_c	2.7.4.6	Nucleotide Salvage Pathway	-1000	1000	(SCc_564)
NH4t	ammonia transport via diffusion	nh4_e <=> nh4_c		Transport, Extracellular	-1000	1000	(SPONTANEOUS)
NICRNTt	Nicotinate_D-ribonucleotide_putative_transporter	nicrnt_e <=> nicrnt_c		Transport, Extracellular	-1000	1000	(SCc_295)
NMNAT	nicotinamide-nucleotide adenylyltransferase	atp_c + h_c + nmn_c --> nad_c + ppi_c	2.7.7.1	Cofactor and Prosthetic Group Biosynthesis	0	1000	(SCc_257) or (SCc_287)
NMNP	NMN permease	nmn_e <=> nmn_c		Transport, Extracellular	-1000	1000	(SCc_295)
NNAT	nicotinate-nucleotide adenylyltransferase	atp_c + h_c + nicrnt_c --> dnad_c + ppi_c	2.7.7.18	Cofactor and Prosthetic Group Biosynthesis	0	1000	(SCc_257)
O2t	o2 transport (diffusion)	o2_e <=> o2_c		Transport, Extracellular	-1000	1000	(SPONTANEOUS)
OHPBAT	O-Phospho-4-hydroxy-L-threonine:2-oxoglutarate aminotransferase	glu_L_c + ohpb_c <=> akg_c + phthr_c	2.6.1.52	Cofactor and Prosthetic Group Biosynthesis	-1000	1000	(SCc_516)
OMPDC	orotidine-5-phosphate decarboxylase	h_c + orot5p_c --> co2_c + ump_c	4.1.1.23	Purine and Pyrimidine Biosynthesis	0	1000	(SCc_711)
ORPT	orotate phosphoribosyltransferase	orot5p_c + ppi_c <=> orot_c + prpp_c	2.4.2.10	Purine and Pyrimidine Biosynthesis	-1000	1000	(SCc_027)
PAPPT3	phospho-N-acetylmuramoyl-pentapeptide-transferase (meso-2,6-diaminopimelate)	udcpp_c + ugmda_c --> uagmda_c + ump_c	2.7.8.13	Cell Envelope Biosynthesis	0	1000	(SCc_134)
PAPSR	phosphoadenylyl-sulfate reductase (thioredoxin)	paps_c + trdrd_c --> 2.0 h_c + pap_c + so3_c + trdox_c	1.8.4.8	Cysteine Metabolism	0	1000	((SCc_156) and (SCc_706))
PASYN_SCc	Phosphatidic acid synthase (SCc)	glyc3p_c + 0.14 hdeACP_c + 0.04 myrsACP_c + octeACP_c + 0.72 palmACP_c + 0.1 tdeACP_c --> 2.0 ACP_c + 0.02 pa_SCc_c		Membrane Lipid Metabolism	0	1000	((SCc_587) and (SCc_015))
PDH	pyruvate dehydrogenase	coa_c + nad_c + pyr_c --> accoa_c + co2_c + nadh_c	1.2.5.1	Glycolysis/Gluconeogenesis	0	1000	((SCc_574) and (SCc_572) and (SCc_573))
PDX5PO2	pyridoxine-5-phosphate oxidase (anaerboic)	nad_c + pdx5p_c --> h_c + nadh_c + pydx5p_c	1.4.3.5	Cofactor and Prosthetic Group Biosynthesis	0	1000	SCc_ORPHAN
PDX5PS	Pyridoxine 5-phosphate synthase	dxyl5p_c + nad_c + phthr_c --> co2_c + 2.0 h2o_c + h_c + nadh_c + pdx5p_c + pi_c		Cofactor and Prosthetic Group Biosynthesis	0	1000	(SCc_249 and SCc_122)
PEPT_SCc	ethanolamine phosphotransferase	cmp_c + h_c + 0.02 pe_SCc_c <=> 0.02 12dgr_SCc_c + cdpea_c	2.7.8.1	Cell Envelope Biosynthesis	-1000	1000	SCc_ORPHAN
PERD	Erythronate 4-phosphate (4per) dehydrogenase	4per_c + nad_c <=> h_c + nadh_c + ohpb_c	1.1.1.290	Cofactor and Prosthetic Group Biosynthesis	-1000	1000	(SCc_491)
PFK	phosphofructokinase	atp_c + f6p_c --> adp_c + fdp_c + h_c	2.7.1.11	Glycolysis/Gluconeogenesis	0	1000	(SCc_678)
PGAMT	phosphoglucosamine mutase	gam1p_c <=> gam6p_c	5.4.2.10	Cell Envelope Biosynthesis	-1000	1000	(SCc_060)
PGI	glucose-6-phosphate isomerase	g6p_c <=> f6p_c	5.3.1.9	Glycolysis/Gluconeogenesis	-1000	1000	(SCc_014)
PGK	phosphoglycerate kinase	3pg_c + atp_c <=> 13dpg_c + adp_c	2.7.2.3	Glycolysis/Gluconeogenesis	-1000	1000	(SCc_185)
PGL	6-phosphogluconolactonase	6pgl_c + h2o_c --> 6pgc_c + h_c	3.1.1.31	Pentose Phosphate Pathway	0	1000	(SCc_297)
PGM	phosphoglycerate mutase	2pg_c <=> 3pg_c	5.4.2.1	Glycolysis/Gluconeogenesis	-1000	1000	(SCc_296)
PGMT	phosphoglucomutase	g1p_c <=> g6p_c	5.4.2.2	Alternate Carbon Metabolism	-1000	1000	(SCc_253)
PGPP_SCc	Phosphatidylglycerol phosphate phosphatase (SCc)	h2o_c + 0.02 pgp_SCc_c --> 0.02 pg_SCc_c + pi_c	3.1.3.27	Membrane Lipid Metabolism	0	1000	(SCc_472)
PGSA_SCc	Phosphatidylglycerol synthase (SCc)	0.02 cdpdag_SCc_c + glyc3p_c <=> cmp_c + h_c + 0.02 pgp_SCc_c	2.7.8.5	Membrane Lipid Metabolism	-1000	1000	(SCc_457)
PHEMEt	pheme_putative_transporter	pheme_e <=> pheme_c		Transport, Extracellular	-1000	1000	SCc_ORPHAN
PHEt	L-phenylalanine_putative_transport	phe_L_e <=> phe_L_c		Transport, Extracellular	-1000	1000	SCc_ORPHAN
PIt	phosphate reversible transport via symport	h_e + pi_e <=> h_c + pi_c		Transport, Extracellular	-1000	1000	(SCc_712)
PMDPHT	pyrimidine phosphatase	5aprbu_c + h2o_c --> 4r5au_c + pi_c	2.5.1.78	Cofactor and Prosthetic Group Biosynthesis	0	1000	(SCc_385)
PNTK	pantothenate kinase	atp_c + pnto_R_c --> 4ppan_c + adp_c + h_c	2.7.1.33	Cofactor and Prosthetic Group Biosynthesis	0	1000	(SCc_734)
PNTOt	Pantothenate_putative_transporter	pnto_R_e <=> pnto_R_c		Transport, Extracellular	-1000	1000	SCc_ORPHAN
PPA	inorganic diphosphatase	h2o_c + ppi_c --> h_c + 2.0 pi_c	3.6.1.1	Anaplerotic reactions	0	1000	(SCc_299 or SCc_068 )
PPA2	inorganic_triphosphatase	h2o_c + pppi_c --> h_c + pi_c + ppi_c	3.6.1.1	Anaplerotic reactions	0	1000	(SCc_299 or SCc_068 )
PPBNGt	Phorphobilinogen_putative_transport	ppbng_e <=> ppbng_c		Transport, Extracellular	-1000	1000	SCc_ORPHAN
PPCDC	phosphopantothenoylcysteine decarboxylase	4ppcys_c + h_c --> co2_c + pan4p_c	4.1.1.36	Cofactor and Prosthetic Group Biosynthesis	0	1000	SCc_ORPHAN
PPK2r	polyphosphate_kinase	atp_c + ppi_c <=> adp_c + pppi_c	2.7.4.1	S_Oxidative_Phosphorylation	-1000	1000	SCc_300
PPKr	polyphosphate_kinase	atp_c + pi_c <=> adp_c + ppi_c	2.7.4.1	S_Oxidative_Phosphorylation	-1000	1000	SCc_300
PPNCL2	phosphopantothenate-cysteine ligase	4ppan_c + ctp_c + cys_L_c --> 4ppcys_c + cmp_c + h_c + ppi_c	6.3.2.5	Cofactor and Prosthetic Group Biosynthesis	0	1000	SCc_ORPHAN
PPPGO	protoporphyrinogen oxidase (aerobic)	1.5 o2_c + pppg9_c --> 3.0 h2o_c + ppp9_c	1.3.3.4	Cofactor and Prosthetic Group Biosynthesis	0	1000	(SCc_013)
PPTGS	Peptidoglycan subunit synthesis	uaagmda_c --> h_c + peptido_SCc_c + udcpdp_c		Cell Envelope Biosynthesis	0	1000	(SCc_634)
PRAGSr	phosphoribosylglycinamide synthase	atp_c + gly_c + pram_c <=> adp_c + gar_c + h_c + pi_c	6.3.4.13	Purine and Pyrimidine Biosynthesis	-1000	1000	(SCc_718)
PRAIi	phosphoribosylanthranilate isomerase (irreversible)	pran_c --> 2cpr5p_c	5.3.1.24	Tyrosine, Tryptophan, and Phenylalanine Metabolism	0	1000	(SCc_378)
PRAIS	phosphoribosylaminoimidazole synthase	atp_c + fpram_c --> adp_c + air_c + 2.0 h_c + pi_c	6.3.3.1	Purine and Pyrimidine Biosynthesis	0	1000	(SCc_303)
PRFGS	phosphoribosylformylglycinamidine synthase	atp_c + fgam_c + gln_L_c + h2o_c --> adp_c + fpram_c + glu_L_c + h_c + pi_c	6.3.5.3	Purine and Pyrimidine Biosynthesis	0	1000	(SCc_570)
PROt	L-proline reversible transport via proton symport	h_e + pro_L_e <=> h_c + pro_L_c		Transport, Extracellular	-1000	1000	(SCc_325)
PRPPS	phosphoribosylpyrophosphate synthetase	atp_c + r5p_c <=> amp_c + h_c + prpp_c	2.7.6.1	Histidine Metabolism	-1000	1000	(SCc_419)
PSCVT	3_phosphoshikimate_1_carboxyvinyltransferase	pep_c + skm5p_c <=> 3psme_c + pi_c	2.5.1.19	S_Tyrosine__Tryptophan__and_Phenylalanine_Metabolism	-1000	1000	( SCc_515 )
PSD_SCc	Phosphatidylserine decarboxylase (SCc)	h_c + 0.02 ps_SCc_c --> co2_c + 0.02 pe_SCc_c	4.1.1.65	Membrane Lipid Metabolism	0	1000	(SCc_078)
PSSA_SCc	Phosphatidylserine syntase (SCc)	0.02 cdpdag_SCc_c + ser_L_c <=> cmp_c + h_c + 0.02 ps_SCc_c	2.7.8.8	Membrane Lipid Metabolism	-1000	1000	(SCc_225)
PTAr	phosphotransacetylase	accoa_c + pi_c <=> actp_c + coa_c	2.3.1.8	Pyruvate Metabolism	-1000	1000	(SCc_500)
PTPATi	pantetheine-phosphate adenylyltransferase	atp_c + h_c + pan4p_c --> dpcoa_c + ppi_c	2.7.7.3	Cofactor and Prosthetic Group Biosynthesis	0	1000	(SCc_033)
PYDX5Pt	Pyridoxal-5-phosphate_putative_transporter	pydx5p_e <=> pydx5p_c		Transport, Extracellular	-1000	1000	SCc_ORPHAN
PYK	pyruvate kinase	adp_c + h_c + pep_c --> atp_c + pyr_c	2.7.1.40	Glycolysis/Gluconeogenesis	0	1000	(SCc_388)
RBFK	riboflavin kinase	atp_c + ribflv_c --> adp_c + fmn_c + h_c	2.7.1.26	Cofactor and Prosthetic Group Biosynthesis	0	1000	(SCc_111)
RBFSa	riboflavin synthase	4r5au_c + db4p_c --> dmlz_c + 2.0 h2o_c + pi_c	2.5.1.9	Cofactor and Prosthetic Group Biosynthesis	0	1000	(SCc_385)
RBFSb	riboflavin synthase	2.0 dmlz_c --> 4r5au_c + ribflv_c	2.5.1.9	Cofactor and Prosthetic Group Biosynthesis	0	1000	(SCc_469)
RIBFLVt	Riboflavine_putative_transporter	ribflv_e <=> ribflv_c		Transport, Extracellular	-1000	1000	(SCc_295)
RNDR1	ribonucleoside-diphosphate reductase (ADP)	adp_c + trdrd_c --> dadp_c + h2o_c + trdox_c	1.17.4.1	Nucleotide Salvage Pathway	0	1000	((SCc_461) and (SCc_462) and (SCc_706))
RNDR2	ribonucleoside-diphosphate reductase (GDP)	gdp_c + trdrd_c --> dgdp_c + h2o_c + trdox_c	1.17.4.1	Nucleotide Salvage Pathway	0	1000	(SCc_461 and SCc_462)
RNDR3	ribonucleoside-diphosphate reductase (CDP)	cdp_c + trdrd_c --> dcdp_c + h2o_c + trdox_c	1.17.4.1	Nucleotide Salvage Pathway	0	1000	(SCc_461 and SCc_462)
RNDR4	ribonucleoside-diphosphate reductase (UDP)	trdrd_c + udp_c --> dudp_c + h2o_c + trdox_c	1.17.4.1	Nucleotide Salvage Pathway	0	1000	(SCc_461 and SCc_462)
RPE	ribulose 5-phosphate 3-epimerase	ru5p_D_c <=> xu5p_D_c	5.1.3.1	Pentose Phosphate Pathway	-1000	1000	(SCc_636)
RPI	ribose-5-phosphate isomerase	r5p_c <=> ru5p_D_c	5.3.1.6	Pentose Phosphate Pathway	-1000	1000	(SCc_187)
S7PI	sedoheptulose 7-phosphate isomerase	s7p_c --> gmhep7p_c		Cell Envelope Biosynthesis	0	1000	(SCc_228)
SADT2	Sulfate adenyltransferase	atp_c + gtp_c + h2o_c + so4_c --> aps_c + gdp_c + pi_c + ppi_c	2.7.7.4	Cysteine Metabolism	0	1000	(SCc_159 and SCc_158)
SDPDS	succinyl-diaminopimelate desuccinylase	h2o_c + sl26da_c --> 26dap_LL_c + succ_c	3.5.1.18	Threonine and Lysine Metabolism	0	1000	(SCc_332)
SDPTA	succinyldiaminopimelate transaminase	glu_L_c + sl2a6o_c <=> akg_c + sl26da_c	2.6.1.17	Threonine and Lysine Metabolism	-1000	1000	SCc_516
SERAT	serine O-acetyltransferase	accoa_c + ser_L_c <=> acser_c + coa_c	2.3.1.30	Cysteine Metabolism	-1000	1000	(SCc_037)
SERt	L-serine reversible transport via proton symport	h_e + ser_L_e <=> h_c + ser_L_c		Transport, Extracellular	-1000	1000	(SCc_528)
SHCHD2	sirohydrochlorin dehydrogenase (NAD)	dscl_c + nad_c --> h_c + nadh_c + scl_c		Cofactor and Prosthetic Group Biosynthesis	0	1000	(SCc_157)
SHCHF	sirohydrochlorin ferrochetalase	fe2_c + scl_c --> 3.0 h_c + sheme_c		Cofactor and Prosthetic Group Biosynthesis	0	1000	(SCc_157)
SHEMEt	Siroheme_putative_transporter	sheme_e <=> sheme_c		Transport, Extracellular	-1000	1000	SCc_ORPHAN
SHKK	shikimate_kinase	atp_c + skm_c --> adp_c + h_c + skm5p_c	2.7.1.71	S_Tyrosine__Tryptophan__and_Phenylalanine_Metabolism	0	1000	( SCc_638 )
SKMt	shikimate_putative_transporter	skm_e <=> skm_c		Transport, Extracellular	-1000	1000	SCc_ORPHAN
SUCOAS	succinyl-CoA synthetase (ADP-forming)	atp_c + coa_c + succ_c <=> adp_c + pi_c + succoa_c	6.2.1.5	Citric Acid Cycle	-1000	1000	(SCc_252 and SCc_251)
SULabc	sulfate transport via ABC system	atp_c + h2o_c + so4_e --> adp_c + h_c + pi_c + so4_c		Transport, Extracellular	0	1000	((SCc_310) and (SCc_309) and (SCc_308) and (SCc_677))
SULR	sulfite reductase (NADPH2)	5.0 h_c + 3.0 nadph_c + so3_c --> 3.0 h2o_c + h2s_c + 3.0 nadp_c	1.8.1.2	Cysteine Metabolism	0	1000	(SCc_154 and SCc_155)
TALA	transaldolase	g3p_c + s7p_c <=> e4p_c + f6p_c	2.2.1.2	Pentose Phosphate Pathway	-1000	1000	(SCc_108)
TDSK	Tetraacyldisaccharide 4kinase	atp_c + lipidAds_c --> adp_c + h_c + lipidA_c	2.7.1.130	Cell Envelope Biosynthesis	0	1000	(SCc_510)
THDPS	tetrahydrodipicolinate succinylase	h2o_c + succoa_c + thdp_c --> coa_c + sl2a6o_c	2.3.1.117	Threonine and Lysine Metabolism	0	1000	(SCc_203)
THFt	Tetrahydrofolate_putative_transporter	thf_e <=> thf_c		Transport, Extracellular	-1000	1000	SCc_ORPHAN
THMabc	thiamine transport via ABC system	atp_c + h2o_c + thm_e --> adp_c + h_c + pi_c + thm_c		Transport, Extracellular	0	1000	((SCc_126) and (SCc_127) and (SCc_128))
THMPPt	Thiamine diphosphate_putative_transporter	thmpp_e <=> thmpp_c		Transport, Extracellular	-1000	1000	SCc_ORPHAN
THRt	L-threonine_putative_transport	thr_L_e <=> thr_L_c		Transport, Extracellular	-1000	1000	SCc_ORPHAN
TKT1	transketolase	r5p_c + xu5p_D_c <=> g3p_c + s7p_c	2.2.1.1	Pentose Phosphate Pathway	-1000	1000	(SCc_184)
TKT2	transketolase	e4p_c + xu5p_D_c <=> f6p_c + g3p_c	2.2.1.1	Pentose Phosphate Pathway	-1000	1000	(SCc_184)
TMDS	thymidylate synthase	dump_c + mlthf_c --> dhf_c + dtmp_c	2.1.1.45	Nucleotide Salvage Pathway	0	1000	(SCc_196)
TMKr	thiamine kinase	atp_c + thm_c --> adp_c + h_c + thmmp_c	2.7.1.89	Cofactor and Prosthetic Group Biosynthesis	0	1000	(SCc_444)
TMPKr	thiamine-phosphate kinase	atp_c + thmmp_c <=> adp_c + thmpp_c	2.7.4.16	Cofactor and Prosthetic Group Biosynthesis	-1000	1000	(SCc_471)
TPI	triose-phosphate isomerase	dhap_c <=> g3p_c	5.3.1.1	Glycolysis/Gluconeogenesis	-1000	1000	(SCc_676)
TRDR	thioredoxin reductase (NADPH)	h_c + nadph_c + trdox_c --> nadp_c + trdrd_c	1.8.1.9	Oxidative Phosphorylation	0	1000	(SCc_520 and SCc_706)
TRPS2	tryptophan synthase (indole)	indole_c + ser_L_c --> h2o_c + trp_L_c	4.2.1.20	Tyrosine, Tryptophan, and Phenylalanine Metabolism	0	1000	(SCc_380 and SCc_379)
TRPS3	tryptophan synthase (indoleglycerol phosphate)	3ig3p_c --> g3p_c + indole_c	4.2.1.20	Tyrosine, Tryptophan, and Phenylalanine Metabolism	0	1000	(SCc_380 and SCc_379)
TRPt	L-tryptophan_putative_transport	trp_L_e <=> trp_L_c		Transport, Extracellular	-1000	1000	SCc_ORPHAN
TYRt	L-tyrosine_putative_transport	tyr_L_e <=> tyr_L_c		Transport, Extracellular	-1000	1000	SCc_ORPHAN
U23GAAT	UDP-3-O-(3-hydroxymyristoyl)glucosamine acyltransferase	3hmrsACP_c + u3hga_c --> ACP_c + h_c + u23ga_c		Cell Envelope Biosynthesis	0	1000	(SCc_215)
UAAGDS	UDP-N-acetylmuramoyl-L-alanyl-D-glutamyl-meso-2,6-diaminopimelate synthetase	26dap_M_c + atp_c + uamag_c --> adp_c + h_c + pi_c + ugmd_c	6.3.2.13	Cell Envelope Biosynthesis	0	1000	(SCc_132)
UAGAAT	UDP-N-acetylglucosamine acyltransferase	3hmrsACP_c + uacgam_c <=> ACP_c + u3aga_c	2.3.1.129	Cell Envelope Biosynthesis	-1000	1000	(SCc_217 and SCc_436)
UAGCVT	UDP-N-acetylglucosamine 1-carboxyvinyltransferase	pep_c + uacgam_c --> pi_c + uaccg_c	2.5.1.7	Cell Envelope Biosynthesis	0	1000	(SCc_603)
UAGDP	UDP-N-acetylglucosamine diphosphorylase	acgam1p_c + h_c + utp_c --> ppi_c + uacgam_c	2.7.7.23	Cell Envelope Biosynthesis	0	1000	(SCc_009)
UAGPT3	UDP-N-acetylglucosamine-N-acetylmuramyl-(pentapeptide)pyrophosphoryl-undecaprenol N-acetylglucosamine transferase	uacgam_c + uagmda_c --> h_c + uaagmda_c + udp_c	2.4.1.150	Cell Envelope Biosynthesis	0	1000	(SCc_137)
UAMAGS	UDP-N-acetylmuramoyl-L-alanyl-D-glutamate synthetase	atp_c + glu_D_c + uama_c --> adp_c + h_c + pi_c + uamag_c	6.3.2.9	Cell Envelope Biosynthesis	0	1000	(SCc_135)
UAMAS	UDP-N-acetylmuramoyl-L-alanine synthetase	ala_L_c + atp_c + uamr_c --> adp_c + h_c + pi_c + uama_c	6.3.2.8	Cell Envelope Biosynthesis	0	1000	(SCc_138)
UAPGR	UDP-N-acetylenolpyruvoylglucosamine reductase	h_c + nadph_c + uaccg_c --> nadp_c + uamr_c	1.1.1.158	Cell Envelope Biosynthesis	0	1000	(SCc_736)
UDCPDP	undecaprenyl-diphosphatase	h2o_c + udcpdp_c --> h_c + pi_c + udcpp_c	3.6.1.27	Cell Envelope Biosynthesis	0	1000	(SCc_527)
UDCPDPS	Undecaprenyl diphosphate synthase	frdp_c + 8.0 ipdp_c --> 8.0 ppi_c + udcpdp_c		Cofactor and Prosthetic Group Biosynthesis	0	1000	(SCc_210)
UDPGD	UDPglucose 6-dehydrogenase	h2o_c + 2.0 nad_c + udpg_c --> 3.0 h_c + 2.0 nadh_c + udpglcur_c	1.1.1.22	Cell Envelope Biosynthesis	0	1000	(SCc_335)
UDPGLCURt	UDP_D_glucuronate_putative_transporter	udpglcur_e <=> udpglcur_c		Transport, Extracellular	-1000	1000	SCc_ORPHAN
UGMDDS	UDP-N-acetylmuramoyl-L-alanyl-D-glutamyl-meso-2,6-diaminopimeloyl-D-alanyl-D-alanine synthetase	alaala_c + atp_c + ugmd_c --> adp_c + h_c + pi_c + ugmda_c	6.3.2.15	Cell Envelope Biosynthesis	0	1000	(SCc_133)
UHGADA	UDP-3-O-acetylglucosamine deacetylase	h2o_c + u3aga_c --> ac_c + u3hga_c		Cell Envelope Biosynthesis	0	1000	(SCc_143)
UMPK	UMP kinase	atp_c + ump_c <=> adp_c + udp_c	2.7.4.14	Nucleotide Salvage Pathway	-1000	1000	(SCc_207) or (SCc_514)
UPP3MT	uroporphyrinogen methyltransferase	2.0 amet_c + uppg3_c --> 2.0 ahcys_c + dscl_c + h_c	2.1.1.107	Cofactor and Prosthetic Group Biosynthesis	0	1000	(SCc_157)
UPP3S	uroporphyrinogen-III synthase	hmbil_c --> h2o_c + uppg3_c	4.2.1.75	Cofactor and Prosthetic Group Biosynthesis	0	1000	(SCc_680)
UPPDC1	uroporphyrinogen decarboxylase (uroporphyrinogen III)	4.0 h_c + uppg3_c --> 4.0 co2_c + cpppg3_c	4.1.1.37	Cofactor and Prosthetic Group Biosynthesis	0	1000	(SCc_719)
URIDK2r	uridylate kinase (dUMP)	atp_c + dump_c <=> adp_c + dudp_c		Nucleotide Salvage Pathway	-1000	1000	(SCc_207)
USHD	UDP-sugar hydrolase	h2o_c + u23ga_c --> 2.0 h_c + lipidX_c + ump_c	3.6.1.54	Cell Envelope Biosynthesis	0	1000	SCc_331
UTPt	UTP_putative_transporter	utp_e <=> utp_c		Transport, Extracellular	-1000	1000	SCc_ORPHAN
VALt	L-valine reversible transport via proton symport	h_e + val_L_e <=> h_c + val_L_c		Transport, Extracellular	-1000	1000	(SCc_286)
ZNabc	zinc_Zn2_transport_via_ABC_system	atp_c + h2o_c + zn2_e --> adp_c + h_c + pi_c + zn2_c		S_Inorganic_Ion_Transport_and_Metabolism	0	1000	SCc_368 and SCc_367
Biomass_whith_wall_SCc	Biomass_whith_wall_SCc	0.000223 10fthf_c + 0.499149 ala_L_c + 0.000223 amet_c + 0.28742 arg_L_c + 0.234232 asn_L_c + 0.234232 asp_L_c + 54.119975 atp_c + 2e-06 btn_c + 0.000129 clpn_SCc_c + 0.000168 coa_c + 0.129799 ctp_c + 0.088988 cys_L_c + 0.024805 datp_c + 0.025612 dctp_c + 0.025612 dgtp_c + 0.024805 dttp_c + 0.000223 fad_c + 0.255712 gln_L_c + 0.255712 glu_L_c + 0.595297 gly_c + 0.000223 gthrd_c + 0.209121 gtp_c +…		Growth	0	1000	UNIVERSAL

## Sheet: Exchanges
R_ID	Name	Reaction formula	LB	UB
EX_4ampm_e	4-Amino-2-methyl-5-phosphomethylpyrimidine exchange	4ampm_e -->	0	1000
EX_4pasp_e	4-Phospho-L-aspartate exchange	4pasp_e <=>	-10	1000
EX_8aonn_e	8-Amino-7-oxononanoate exchange	8aonn_e <=>	-10	1000
EX_ac_e	Acetate exchange	ac_e -->	0	1000
EX_ahcys_e	Adenosyl-homocysteine exchange	ahcys_e -->	0	1000
EX_akg_e	2-Oxoglutarate exchange	akg_e -->	0	1000
EX_ala_D_e	D-Alanine exchange	ala_D_e <=>	-1000	10
EX_ala_L_e	L-Alanine exchange	ala_L_e <=>	-1000	10
EX_amet_e	S-Adenosyl-L-methionine_exchange	amet_e -->	0	1000
EX_amob_e	S-Adenosyl-4-methylthio-2-oxobutanoate_exchange	amob_e <=>	-1000	1000
EX_amp_e	amp exchange	amp_e -->	0	1000
EX_anth_e	Anthranilate exchange	anth_e <--	-100	0
EX_arg_L_e	L-Arginine exchange	arg_L_e <--	-10	0
EX_asn_L_e	L-Asparagine exchange	asn_L_e <--	-10	0
EX_asp_L_e	L-Aspartate exchange	asp_L_e <=>	-1	1000
EX_btn_e	Biotin exchange	btn_e -->	0	1000
EX_co2_e	CO2 exchange	co2_e <=>	-1000	1000
EX_ctp_e	ctp exchange	ctp_e -->	0	1000
EX_cys_L_e	L-Cysteine exchange	cys_L_e -->	0	1000
EX_dad_5_e	5_Deoxyadenosine_exchange	dad_5_e -->	0	1000
EX_datp_e	datp exchange	datp_e -->	0	1000
EX_dctp_e	dctp exchange	dctp_e -->	0	1000
EX_dgtp_e	dgtp exchange	dgtp_e -->	0	1000
EX_dttp_e	dttp exchange	dttp_e -->	0	1000
EX_fad_e	fad exchange	fad_e -->	0	1000
EX_fe2_e	Fe2+ exchange	fe2_e <--	-1000	0
EX_fmn_e	fmn exchange	fmn_e -->	0	1000
EX_for_e	Formate exchange	for_e <=>	-1000	1000
EX_fru_e	D-Fructose exchange	fru_e <=>	-1	1000
EX_fum_e	Fumarate exchange	fum_e -->	0	1000
EX_gcald_e	Glycolaldehyde exchange	gcald_e -->	0	1000
EX_glc_D_e	D-Glucose exchange	glc_D_e <--	-10	0
EX_gln_L_e	L-Glutamine exchange	gln_L_e <--	-10	0
EX_glu_L_e	L-Glutamate exchange	glu_L_e -->	0	1000
EX_gly_e	Glycine exchange	gly_e -->	0	1000
EX_glyc_e	Glycerol exchange	glyc_e -->	0	1000
EX_gthrd_e	Reduced glutathione exchange	gthrd_e -->	0	1000
EX_gtp_e	gtp exchange	gtp_e -->	0	1000
EX_h_e	H+ exchange	h_e <=>	-1000	1000
EX_h2o_e	H2O exchange	h2o_e <=>	-1000	1000
EX_h2s_e	H2S_exchange	h2s_e -->	0	1000
EX_hemeO_e	hemeO exchange	hemeO_e -->	0	1000
EX_his_L_e	L-Histidine exchange	his_L_e <--	-10	0
EX_hxan_e	Hypoxanthine exchange	hxan_e <=>	-10	1000
EX_ile_L_e	L-Isoleucine exchange	ile_L_e <--	-10	0
EX_k_e	K_exchange	k_e <--	-1000	0
EX_leu_L_e	L-Leucine exchange	leu_L_e <--	-10	0
EX_lys_L_e	L-Lysine exchange	lys_L_e <--	-10	0
EX_met_L_e	L-Methionine exchange	met_L_e <=>	-10	1000
EX_nad_e	nad exchange	nad_e -->	0	1000
EX_nadp_e	nadp exchange	nadp_e -->	0	1000
EX_nh4_e	Ammonia exchange	nh4_e <=>	-1000	1000
EX_nicrnt_e	nicrnt_exchange	nicrnt_e <=>	-10	1000
EX_nmn_e	NMN exchange	nmn_e <=>	-1	1000
EX_o2_e	O2 exchange	o2_e <--	-18.5	0
EX_phe_L_e	L-Phenylalanine exchange	phe_L_e <--	-10	0
EX_pheme_e	protoheme exchange	pheme_e -->	0	1000
EX_pi_e	Phosphate exchange	pi_e <=>	-1000	1000
EX_pnto_R_e	(R)-Pantothenate exchange	pnto_R_e <--	-1	0
EX_ppbng_e	Porphobilinogen exchange	ppbng_e <--	-1	0
EX_pro_L_e	L-Proline exchange	pro_L_e <--	-10	0
EX_pydx5p_e	Pyridoxal-5-phosphate exchange	pydx5p_e -->	0	1000
EX_ribflv_e	riboflavine exchange	ribflv_e -->	0	1000
EX_SCc_Biomass	EX_SCc_Biomass	SCc_Biomass_e -->	0	1000
EX_ser_L_e	L-Serine exchange	ser_L_e <=>	-10	1000
EX_sheme_e	siroheme exchange	sheme_e -->	0	1000
EX_skm_e	Shikimate_exchange	skm_e <--	-10	0
EX_so4_e	Sulfate exchange	so4_e <=>	-1000	1000
EX_thf_e	Tetrahydrofolate_exchange	thf_e -->	0	1000
EX_thm_e	Thiamin exchange	thm_e <--	-10	0
EX_thmpp_e	Thiamine diphosphate exchange	thmpp_e -->	0	1000
EX_thr_L_e	L-Threonine exchange	thr_L_e <--	-10	0
EX_trp_L_e	L-Tryptophan exchange	trp_L_e -->	0	1000
EX_tyr_L_e	L-Tyrosine exchange	tyr_L_e <--	-10	0
EX_udpglcur_e	UDP_D_glucuronate_exchange	udpglcur_e -->	0	1000
EX_utp_e	utp exchange	utp_e -->	0	1000
EX_val_L_e	L-Valine exchange	val_L_e <--	-10	0
EX_zn2_e	Zinc_exchange	zn2_e <--	-1000	0

## Sheet: Metabolites
ID	Name	Formula	Charge
10fthf_c	10-Formyltetrahydrofolate	C20H21N7O7	-2
12dgr_SCc_c	1,2-Diacylglycerol (Serratia symbiotica SCc)	C1836H3448O250	0
13dpg_c	3-Phospho-D-glyceroyl phosphate	C3H4O10P2	-4
23dhdp_c	2,3-Dihydrodipicolinate	C7H5NO4	-2
25drapp_c	2,5-Diamino-6-(ribosylamino)-4-(3H)-pyrimidinone 5-phosphate	C9H14N5O8P	-2
26dap_LL_c	LL-2,6-Diaminoheptanedioate	C7H14N2O4	0
26dap_M_c	meso-2,6-Diaminoheptanedioate	C7H14N2O4	0
2cpr5p_c	1-(2-Carboxyphenylamino)-1-deoxy-D-ribulose 5-phosphate	C12H13NO9P	-3
2me4p_c	2-C-methyl-D-erythritol 4-phosphate	C5H11O7P	-2
2mecdp_c	2-C-methyl-D-erythritol 2,4-cyclodiphosphate	C5H10O9P2	-2
2p4c2me_c	2-phospho-4-(cytidine 5-diphospho)-2-C-methyl-D-erythritol	C14H22N3O17P3	-4
2pg_c	D-Glycerate 2-phosphate	C3H4O7P	-3
3hmrsACP_c	(R)-3-Hydroxytetradecanoyl-[acyl-carrier protein]	C25H47N2O9PRS	-1
3ig3p_c	C-(3-Indolyl)-glycerol 3-phosphate	C11H12NO6P	-2
3pg_c	3-Phospho-D-glycerate	C3H4O7P	-3
3psme_c	M_5_O__1_Carboxyvinyl__3_phosphoshikimate	C10H9O10P	-4
4abz_c	4-Aminobenzoate	C7H6NO2	-1
4adcho_c	4-amino-4-deoxychorismate	C10H10NO5	-1
4c2me_c	4-(cytidine 5-diphospho)-2-C-methyl-D-erythritol	C14H23N3O14P2	-2
4pasp_c	4-Phospho-L-aspartate	C4H6NO7P	-2
4pasp_e	4-Phospho-L-aspartate	C4H6NO7P	-2
4per_c	4-Phospho-D-erythronate	C4H6O8P	-3
4ppan_c	D-4-Phosphopantothenate	C9H15NO8P	-3
4ppcys_c	N-((R)-4-Phosphopantothenoyl)-L-cysteine	C12H20N2O9PS	-3
4r5au_c	4-(1-D-Ribitylamino)-5-aminouracil	C9H16N4O6	0
5aprbu_c	5-Amino-6-(5-phosphoribitylamino)uracil	C9H15N4O9P	-2
5apru_c	5-Amino-6-(5-phosphoribosylamino)uracil	C9H13N4O9P	-2
6hmhpt_c	6-hydroxymethyl dihydropterin	C7H9N5O2	0
6hmhptpp_c	6-hydroxymethyl-dihydropterin pyrophosphate	C7H8N5O8P2	-3
6pgc_c	6-Phospho-D-gluconate	C6H10O10P	-3
6pgl_c	6-phospho-D-glucono-1,5-lactone	C6H9O9P	-2
8aonn_c	8-Amino-7-oxononanoate	C9H17NO3	0
8aonn_e	8-Amino-7-oxononanoate	C9H17NO3	0
ACP_c	acyl carrier protein	C11H21N2O7PRS	-1
acACP_c	Acetyl-ACP	C13H23N2O8PRS	-1
ac_c	Acetate	C2H3O2	-1
ac_e	Acetate	C2H3O2	-1
accoa_c	Acetyl-CoA	C23H34N7O17P3S	-4
acgam1p_c	N-Acetyl-D-glucosamine 1-phosphate	C8H14NO9P	-2
acser_c	O-Acetyl-L-serine	C5H9NO4	0
actACP_c	Acetoacetyl-ACP	C15H25N2O9PRS	-1
actp_c	Acetyl phosphate	C2H3O5P	-2
adp_c	ADP	C10H12N5O10P2	-3
adphep_DD_c	ADP-D-glycero-D-manno-heptose	C17H25N5O16P2	-2
adphep_LD_c	ADP-L-glycero-D-manno-heptose	C17H25N5O16P2	-2
ahcys_c	S-Adenosyl-L-homocysteine	C14H20N6O5S	0
ahcys_e	S-Adenosyl-L-homocysteine	C14H20N6O5S	0
ahdt_c	2-Amino-4-hydroxy-6-(erythro-1,2,3-trihydroxypropyl)dihydropteridine triphosphate	C9H12N5O13P3	-4
air_c	5-amino-1-(5-phospho-D-ribosyl)imidazole	C8H12N3O7P	-2
4ampm_c	M_4_Amino_2_methyl_5_phosphomethylpyrimidine	C6H8N3O4P	-2
4ampm_e	M_4_Amino_2_methyl_5_phosphomethylpyrimidine	C6H8N3O4P	-2
akg_c	2-Oxoglutarate	C5H4O5	-2
akg_e	2-Oxoglutarate	C5H4O5	-2
ala_D_c	D-Alanine	C3H7NO2	0
ala_D_e	D-Alanine	C3H7NO2	0
ala_L_c	L-Alanine	C3H7NO2	0
ala_L_e	L-Alanine	C3H7NO2	0
alaala_c	D-Alanyl-D-alanine	C6H12N2O3	0
amet_c	S-Adenosyl-L-methionine	C15H23N6O5S	1
amet_e	S-Adenosyl-L-methionine	C15H23N6O5S	1
amob_c	S-Adenosyl-4-methylthio-2-oxobutanoate	C15H19N5O6S	0
amob_e	S-Adenosyl-4-methylthio-2-oxobutanoate	C15H19N5O6S	0
amp_c	AMP	C10H12N5O7P	-2
amp_e	AMP	C10H12N5O7P	-2
anth_c	Anthranilate	C7H6NO2	-1
anth_e	Anthranilate	C7H6NO2	-1
aps_c	Adenosine 5-phosphosulfate	C10H12N5O10PS	-2
ara5p_c	D-Arabinose 5-phosphate	C5H9O8P	-2
arg_L_c	L-Arginine	C6H15N4O2	1
arg_L_e	L-Arginine	C6H15N4O2	1
asn_L_c	L-Asparagine	C4H8N2O3	0
asn_L_e	L-Asparagine	C4H8N2O3	0
asp_L_c	L-Aspartate	C4H6NO4	-1
asp_L_e	L-Aspartate	C4H6NO4	-1
aspsa_c	L-Aspartate 4-semialdehyde	C4H7NO3	0
atp_c	ATP	C10H12N5O13P3	-4
btn_c	Biotin	C10H15N2O3S	-1
btn_e	Biotin	C10H15N2O3S	-1
cbasp_c	N-Carbamoyl-L-aspartate	C5H6N2O5	-2
cbp_c	Carbamoyl phosphate	CH2NO5P	-2
cdp_c	CDP	C9H12N3O11P2	-3
cdpdag_SCc_c	CDPdiacylglycerol (SCc)	C2286H3998N150O750P100	-100
cdpea_c	CDPethanolamine	C11H19N4O11P2	-1
chor_c	M_chorismate	C10H8O6	-2
ckdo_c	CMP-3-deoxy-D-manno-octulosonate	C17H24N3O15P	-2
clpn_SCc_c	Cardiolipin (Serratia symbiotica)	C3822H7096O850P100	-100
cmp_c	CMP	C9H12N3O8P	-2
co2_c	CO2	CO2	0
co2_e	CO2	CO2	0
coa_c	Coenzyme A	C21H32N7O16P3S	-4
cpppg3_c	Coproporphyrinogen III	C36H40N4O8	-4
ctp_c	CTP	C9H12N3O14P3	-4
ctp_e	CTP	C9H12N3O14P3	-4
cys_L_c	L-Cysteine	C3H7NO2S	0
cys_L_e	L-Cysteine	C3H7NO2S	0
dad_5_c	M_5__Deoxyadenosine	C10H13N5O3	0
dad_5_e	M_5__Deoxyadenosine	C10H13N5O3	0
dadp_c	dADP	C10H12N5O9P2	-3
dann_c	7,8-Diaminononanoate	C9H21N2O2	1
datp_c	dATP	C10H12N5O12P3	-4
datp_e	dATP	C10H12N5O12P3	-4
db4p_c	3,4-dihydroxy-2-butanone 4-phosphate	C4H7O6P	-2
dcamp_c	N6-(1,2-Dicarboxyethyl)-AMP	C14H14N5O11P	-4
dcdp_c	dCDP	C9H12N3O10P2	-3
dctp_c	dCTP	C9H12N3O13P3	-4
dctp_e	dCTP	C9H12N3O13P3	-4
ddcaACP_c	Dodecanoyl-ACP (n-C12:0ACP)	C23H43N2O8PRS	-1
dgdp_c	dGDP	C10H12N5O10P2	-3
dgtp_c	dGTP	C10H12N5O13P3	-4
dgtp_e	dGTP	C10H12N5O13P3	-4
dhap_c	Dihydroxyacetone phosphate	C3H5O6P	-2
dhf_c	7,8-Dihydrofolate	C19H19N7O6	-2
dhnpt_c	Dihydroneopterin	C9H13N5O4	0
dhor_S_c	(S)-Dihydroorotate	C5H5N2O4	-1
dhpmp_c	Dihydroneopterin monophosphate	C9H12N5O7P	-2
dhpt_c	Dihydropteroate	C14H13N6O3	-1
dmlz_c	6,7-Dimethyl-8-(1-D-ribityl)lumazine	C13H18N4O6	0
dmpp_c	Dimethylallyl diphosphate	C5H9O7P2	-3
dnad_c	Deamino-NAD+	C21H24N6O15P2	-2
dpcoa_c	Dephospho-CoA	C21H33N7O13P2S	-2
dscl_c	dihydrosirohydrochlorin	C42H41N4O16	-7
dtbt_c	Dethiobiotin	C10H17N2O3	-1
dtdp_c	dTDP	C10H13N2O11P2	-3
dtmp_c	dTMP	C10H13N2O8P	-2
dttp_c	dTTP	C10H13N2O14P3	-4
dttp_e	dTTP	C10H13N2O14P3	-4
dudp_c	dUDP	C9H11N2O11P2	-3
dump_c	dUMP	C9H11N2O8P	-2
dxyl5p_c	1-deoxy-D-xylulose 5-phosphate	C5H9O7P	-2
e4p_c	D-Erythrose 4-phosphate	C4H7O7P	-2
f1p_c	D-Fructose 1-phosphate	C6H11O9P	-2
f6p_c	D-Fructose 6-phosphate	C6H11O9P	-2
fad_c	Flavin adenine dinucleotide oxidized	C27H31N9O15P2	-2
fad_e	Flavin adenine dinucleotide oxidized	C27H31N9O15P2	-2
fdp_c	D-Fructose 1,6-bisphosphate	C6H10O12P2	-4
fe2_c	Fe2+	Fe	2
fe2_e	Fe2+	Fe	2
fgam_c	N2-Formyl-N1-(5-phospho-D-ribosyl)glycinamide	C8H13N2O9P	-2
fmn_c	FMN	C17H19N4O9P	-2
fmn_e	FMN	C17H19N4O9P	-2
for_c	Formate	CH1O2	-1
for_e	Formate	CH1O2	-1
fpram_c	2-(Formamido)-N1-(5-phospho-D-ribosyl)acetamidine	C8H15N3O8P	-1
frdp_c	Farnesyl diphosphate	C15H25O7P2	-3
fru_e	D-Fructose	C6H12O6	0
fum_c	Fumarate	C4H2O4	-2
fum_e	Fumarate	C4H2O4	-2
g1p_c	D-Glucose 1-phosphate	C6H11O9P	-2
g3p_c	Glyceraldehyde 3-phosphate	C3H5O6P	-2
g6p_c	D-Glucose 6-phosphate	C6H11O9P	-2
gam1p_c	D-Glucosamine 1-phosphate	C6H13NO8P	-1
gam6p_c	D-Glucosamine 6-phosphate	C6H13NO8P	-1
gar_c	N1-(5-Phospho-D-ribosyl)glycinamide	C7H14N2O8P	-1
gcald_c	Glycolaldehyde	C2H4O2	0
gcald_e	Glycolaldehyde	C2H4O2	0
gdp_c	GDP	C10H12N5O11P2	-3
glc_D_e	M_D_Glucose	C6H12O6	0
gln_L_c	L-Glutamine	C5H10N2O3	0
gln_L_e	L-Glutamine	C5H10N2O3	0
glu_D_c	D-Glutamate	C5H8NO4	-1
glu_L_c	L-Glutamate	C5H8NO4	-1
glu_L_e	L-Glutamate	C5H8NO4	-1
glucys_c	gamma-L-Glutamyl-L-cysteine	C8H13N2O5S	-1
gly_c	Glycine	C2H5NO2	0
gly_e	Glycine	C2H5NO2	0
glyc3p_c	Glycerol 3-phosphate	C3H7O6P	-2
glyc_c	Glycerol	C3H8O3	0
glyc_e	Glycerol	C3H8O3	0
glyclt_c	Glycolate	C2H3O3	-1
gmhep17bp_c	D-Glycero-D-manno-heptose 1,7-bisphosphate	C7H12O13P2	-4
gmhep1p_c	D-Glycero-D-manno-heptose 1-phosphate	C7H13O10P	-2
gmhep7p_c	D-Glycero-D-manno-heptose 7-phosphate	C7H13O10P	-2
gmp_c	GMP	C10H12N5O8P	-2
grdp_c	Geranyl diphosphate	C10H17O7P2	-3
gthrd_c	Reduced glutathione	C10H16N3O6S	-1
gthrd_e	Reduced glutathione	C10H16N3O6S	-1
gtp_c	GTP	C10H12N5O14P3	-4
gtp_e	GTP	C10H12N5O14P3	-4
h2mb4p_c	1-hydroxy-2-methyl-2-(E)-butenyl 4-diphosphate	C5H9O8P2	-3
h2o_c	H2O	H2O	0
h2o_e	H2O	H2O	0
h2s_c	Hydrogen sulfide	H2S	0
h2s_e	Hydrogen sulfide	H2S	0
h_c	H+	H	1
h_e	H+	H	1
hco3_c	Bicarbonate	CHO3	-1
hdeACP_c	cis-hexadec-9-enoyl-[acyl-carrier protein] (n-C16:1)	C27H49N2O8PRS	-1
hemeO_c	Heme O	C49H56FeN4O5	-2
hemeO_e	Heme O	C49H56FeN4O5	-2
his_L_c	L-Histidine	C6H9N3O2	0
his_L_e	L-Histidine	C6H9N3O2	0
hmbil_c	Hydroxymethylbilane	C40H38N4O17	-8
hxan_c	Hypoxanthine	C5H4N4O	0
hxan_e	Hypoxanthine	C5H4N4O	0
ile_L_c	L-Isoleucine	C6H13NO2	0
ile_L_e	L-Isoleucine	C6H13NO2	0
imp_c	IMP	C10H11N4O8P	-2
indole_c	Indole	C8H7N	0
ipdp_c	Isopentenyl diphosphate	C5H9O7P2	-3
kdo2lipid4L_c	KDO(2)-lipid IV(A) with laurate	C96H170N2O38P2	-6
kdo2lipid4L_e	KDO(2)-lipid IV(A) with laurate	C96H170N2O38P2	-6
kdo2lipid4_c	KDO(2)-lipid IV(A)	C84H148N2O37P2	-6
kdo8p_c	3-Deoxy-D-manno-octulosonate 8-phosphate	C8H12O11P	-3
kdo_c	3-Deoxy-D-manno-2-octulosonate	C8H13O8	-1
kdolipid4_c	KDO-lipid IV(A)	C76H137N2O30P2	-5
leu_L_c	L-Leucine	C6H13NO2	0
leu_L_e	L-Leucine	C6H13NO2	0
lipa_c	KDO(2)-lipid (A)	C110H196N2O39P2	-6
lipidA_c	2,3,23-Tetrakis(beta-hydroxymyristoyl)-D-glucosaminyl-1,6-beta-D-glucosamine 1,4-bisphosphate	C68H126N2O23P2	-4
lipidAds_c	Lipid A Disaccharide	C68H127N2O20P	-2
lipidX_c	2,3-Bis(3-hydroxytetradecanoyl)-beta-D-glucosaminyl 1-phosphate	C34H64NO12P	-2
lps_SCc_c	lipopolysaccharide (SCc)	C171H297N4O88P2	-7
lys_L_c	L-Lysine	C6H15N2O2	1
lys_L_e	L-Lysine	C6H15N2O2	1
malACP_c	Malonyl-[acyl-carrier protein]	C14H22N2O10PRS	-2
malcoa_c	Malonyl-CoA	C24H33N7O19P3S	-5
met_L_c	L-Methionine	C5H11NO2S	0
met_L_e	L-Methionine	C5H11NO2S	0
methf_c	5,10-Methenyltetrahydrofolate	C20H20N7O6	-1
mlthf_c	5,10-Methylenetetrahydrofolate	C20H21N7O6	-2
q8h2_c	Ubiquinol 8	C49H76O4	0
q8_c	Ubiquinone 8	C49H74O4	0
myrsACP_c	Myristoyl-ACP (n-C14:0ACP)	C25H47N2O8PRS	-1
nad_c	Nicotinamide adenine dinucleotide	C21H26N7O14P2	-1
nad_e	Nicotinamide adenine dinucleotide	C21H26N7O14P2	-1
nadh_c	Nicotinamide adenine dinucleotide - reduced	C21H27N7O14P2	-2
nadp_c	Nicotinamide adenine dinucleotide phosphate	C21H25N7O17P3	-3
nadp_e	Nicotinamide adenine dinucleotide phosphate	C21H25N7O17P3	-3
nadph_c	Nicotinamide adenine dinucleotide phosphate - reduced	C21H26N7O17P3	-4
nh4_c	Ammonium	H4N	1
nh4_e	Ammonium	H4N	1
nicrnt_c	Nicotinate D-ribonucleotide	C11H12NO9P	-2
nicrnt_e	Nicotinate D-ribonucleotide	C11H12NO9P	-2
nmn_c	NMN	C11H14N2O8P	-1
nmn_e	NMN	C11H14N2O8P	-1
o2_c	O2	O2	0
o2_e	O2	O2	0
octeACP_c	cis-octadec-11-enoyl-[acyl-carrier protein] (n-C18:1)	C29H53N2O8PRS	-1
ohpb_c	2-Oxo-3-hydroxy-4-phosphobutanoate	C4H4O8P	-3
orot5p_c	Orotidine 5-phosphate	C10H10N2O11P	-3
orot_c	Orotate	C5H3N2O4	-1
pa_SCc_c	phosphatidate (SCc)	C1836H3398O400P50	-100
palmACP_c	Palmitoyl-ACP (n-C16:0ACP)	C27H51N2O8PRS	-1
pan4p_c	Pantetheine 4-phosphate	C11H21N2O7PS	-2
pap_c	Adenosine 3,5-bisphosphate	C10H11N5O10P2	-4
paps_c	3-Phosphoadenylyl sulfate	C10H11N5O13P2S	-4
pdx5p_c	Pyridoxine 5-phosphate	C8H10NO6P	-2
pe_SCc_c	Phosphatidylethanolamine (SCc)	C1936H3748N50O400P50	0
pep_c	Phosphoenolpyruvate	C3H2O6P	-3
peptido_SCc_c	Peptidoglycan subunit of Serratia symbiotica	C40H62N8O21	-2
pg_SCc_c	Phosphatidylglycerol (SCc)	C1986H3748O500P50	-50
pgp_SCc_c	Phosphatidylglycerophosphate (SCc)	C1986H3698O650P100	-150
phe_L_c	L-Phenylalanine	C9H11NO2	0
phe_L_e	L-Phenylalanine	C9H11NO2	0
pheme_c	Protoheme	C34H30FeN4O4	-2
pheme_e	Protoheme	C34H30FeN4O4	-2
phthr_c	O-Phospho-4-hydroxy-L-threonine	C4H8NO7P	-2
pi_c	Phosphate	HO4P	-2
pi_e	Phosphate	HO4P	-2
pnto_R_c	(R)-Pantothenate	C9H16NO5	-1
pnto_R_e	(R)-Pantothenate	C9H16NO5	-1
ppbng_c	Porphobilinogen	C10H13N2O4	-1
ppbng_e	Porphobilinogen	C10H13N2O4	-1
ppi_c	Diphosphate	HO7P2	-3
ppp9_c	Protoporphyrin	C34H32N4O4	-2
pppg9_c	Protoporphyrinogen IX	C34H38N4O4	-2
pram_c	5-Phospho-beta-D-ribosylamine	C5H11NO7P	-1
pran_c	N-(5-Phospho-D-ribosyl)anthranilate	C12H13NO9P	-3
pro_L_c	L-Proline	C5H9NO2	0
pro_L_e	L-Proline	C5H9NO2	0
prpp_c	5-Phospho-alpha-D-ribose 1-diphosphate	C5H8O14P3	-5
ps_SCc_c	phosphatidylserine (SCc)	C1986H3698N50O500P50	-50
pydx5p_c	Pyridoxal-phosphate	C8H8NO6P	-2
pydx5p_e	Pyridoxal-phosphate	C8H8NO6P	-2
pyr_c	Pyruvate	C3H3O3	-1
r5p_c	alpha-D-Ribose 5-phosphate	C5H9O8P	-2
ribflv_c	Riboflavin	C17H20N4O6	0
ribflv_e	Riboflavin	C17H20N4O6	0
ru5p_D_c	D-Ribulose 5-phosphate	C5H9O8P	-2
SCc_Biomass_e	SCc	Biomass	0
s7p_c	Sedoheptulose 7-phosphate	C7H13O10P	-2
scl_c	sirohydrochlorin	C42H39N4O16	-7
ser_L_c	L-Serine	C3H7NO3	0
ser_L_e	L-Serine	C3H7NO3	0
sheme_c	Siroheme	C42H36FeN4O16	-8
sheme_e	Siroheme	C42H36FeN4O16	-8
skm_c	M_Shikimate	C7H9O5	-1
skm_e	M_Shikimate	C7H9O5	-1
skm5p_c	M_Shikimate_5_phosphate	C7H8O8P	-3
sl26da_c	N-Succinyl-LL-2,6-diaminoheptanedioate	C11H16N2O7	-2
sl2a6o_c	N-Succinyl-2-L-amino-6-oxoheptanedioate	C11H12NO8	-3
so3_c	Sulfite	O3S	-2
so4_c	Sulfate	O4S	-2
so4_e	Sulfate	O4S	-2
succ_c	Succinate	C4H4O4	-2
succoa_c	Succinyl-CoA	C25H35N7O19P3S	-5
tdeACP_c	cis-tetradec-7-enoyl-[acyl-carrier protein] (n-C14:1)	C25H45N2O8PRS	-1
thdp_c	2,3,4,5-Tetrahydrodipicolinate	C7H7NO4	-2
thf_c	5,6,7,8-Tetrahydrofolate	C19H21N7O6	-2
thf_e	5,6,7,8-Tetrahydrofolate	C19H21N7O6	-2
thm_c	Thiamin	C12H17N4OS	1
thm_e	Thiamin	C12H17N4OS	1
thmmp_c	Thiamin monophosphate	C12H16N4O4PS	-1
thmpp_c	Thiamine diphosphate	C12H16N4O7P2S	-2
thmpp_e	Thiamine diphosphate	C12H16N4O7P2S	-2
thr_L_c	L-Threonine	C4H9NO3	0
thr_L_e	L-Threonine	C4H9NO3	0
trdox_c	Oxidized thioredoxin	X	0
trdrd_c	Reduced thioredoxin	XH2	0
trp_L_c	L-Tryptophan	C11H12N2O2	0
trp_L_e	L-Tryptophan	C11H12N2O2	0
tyr_L_c	L-Tyrosine	C9H11NO3	0
tyr_L_e	L-Tyrosine	C9H11NO3	0
u23ga_c	UDP-2,3-bis(3-hydroxytetradecanoyl)glucosamine	C43H75N3O20P2	-2
u3aga_c	UDP-3-O-(3-hydroxytetradecanoyl)-N-acetylglucosamine	C31H51N3O19P2	-2
u3hga_c	UDP-3-O-(3-hydroxytetradecanoyl)-D-glucosamine	C29H50N3O18P2	-1
uaagmda_c	Undecaprenyl-diphospho-N-acetylmuramoyl-(N-acetylglucosamine)-L-ala-D-glu-meso-2,6-diaminopimeloyl-D-ala-D-ala	C95H152N8O28P2	-4
uaccg_c	UDP-N-acetyl-3-O-(1-carboxyvinyl)-D-glucosamine	C20H26N3O19P2	-3
uacgam_c	UDP-N-acetyl-D-glucosamine	C17H25N3O17P2	-2
uagmda_c	Undecaprenyl-diphospho-N-acetylmuramoyl-L-alanyl-D-glutamyl-meso-2,6-diaminopimeloyl-D-alanyl-D-alanine	C87H139N7O23P2	-4
uama_c	UDP-N-acetylmuramoyl-L-alanine	C23H33N4O20P2	-3
uamag_c	UDP-N-acetylmuramoyl-L-alanyl-D-glutamate	C28H39N5O23P2	-4
uamr_c	UDP-N-acetylmuramate	C20H28N3O19P2	-3
udcpdp_c	Undecaprenyl diphosphate	C55H89O7P2	-3
udcpp_c	Undecaprenyl phosphate	C55H89O4P	-2
udp_c	UDP	C9H11N2O12P2	-3
udpg_c	UDPglucose	C15H22N2O17P2	-2
udpglcur_c	UDP-D-glucuronate	C15H19N2O18P2	-3
udpglcur_e	UDP-D-glucuronate	C15H19N2O18P2	-3
ugmd_c	UDP-N-acetylmuramoyl-L-alanyl-D-gamma-glutamyl-meso-2,6-diaminopimelate	C35H51N7O26P2	-4
ugmda_c	UDP-N-acetylmuramoyl-L-alanyl-D-glutamyl-meso-2,6-diaminopimeloyl-D-alanyl-D-alanine	C41H61N9O28P2	-4
ump_c	UMP	C9H11N2O9P	-2
uppg3_c	Uroporphyrinogen III	C40H36N4O16	-8
utp_c	UTP	C9H11N2O15P3	-4
utp_e	UTP	C9H11N2O15P3	-4
val_L_c	L-Valine	C5H11NO2	0
val_L_e	L-Valine	C5H11NO2	0
xmp_c	Xanthosine 5-phosphate	C10H11N4O9P	-2
xu5p_D_c	D-Xylulose 5-phosphate	C5H9O8P	-2
dutp_c	M_dUTP	C9H11N2O14P3	-4
zn2_c	M_Zinc	Zn	2
zn2_e	M_Zinc	Zn	2
k_c	M_potassium	K	1
k_e	M_potassium	K	1
pppi_c	M_Inorganic_triphosphate	HO10P3	-4
