# Supplementary material for: Determinism and Contingency Shape Metabolic Complementation in an Endosymbiotic Consortium
Source: Front Microbiol. 2017 Nov 22;8:2290. doi: 10.3389/fmicb.2017.02290 (PMC5702781; doi:10.3389/fmicb.2017.02290)
Supplement: Supplementary Table S2 — Genome-scale metabolic model of Buchnera aphidicola BCc iBCc98. The file corresponds to the representation of the iBCc98 model in spreadsheet format, and includes the following four sheets: (i) the list of reactions; (ii) listing of exchange fluxes; (iii) listing of metabolites; (iv) the list of reactions and metabolic genes that were not included in the model. [file Table2.XLSX]

## Sheet: Reactions
R_ID	Name	Reaction formula	E.C. Number	Subsystem	LB	UB	Gene_reaction_rule	NOTES
8AONNt	R_8_amino_7_oxononanoate_transport	8aonn_c <=> 8aonn_e		Transport, Extracellular	-1000	1000	BCc_ORPHAN
ACHBS	R_2_aceto_2_hydroxybutanoate_synthase	2obut_c + h_c + pyr_c --> 2ahbut_c + co2_c	2.2.1.6	Valine Leucine and Isoleucine Metabolism	0	1000	( ( BCc_139 and BCc_138 ) )
ACKr	R_acetate_kinase	ac_c + atp_c <=> actp_c + adp_c	2.7.2.1	Pyruvate Metabolism	-1000	1000	( BCc_114 )
ACLS	R_acetolactate_synthase	h_c + 2.0 pyr_c --> alac_S_c + co2_c	4.1.3.18	Valine Leucine and Isoleucine Metabolism	0	1000	( ( BCc_139 and BCc_138 ) )
ACt	R_Acetate_putative_transporter	ac_e <=> ac_c		Transport, Extracellular	-1000	1000	BCc_ORPHAN
ADK1	R_adenylate_kinase	amp_c + atp_c --> 2.0 adp_c	2.7.4.3	Nucleotide Salvage Pathway	0	1000	( BCc_303 )
AICARt	R_AICAR_putative_transporter	aicar_e <=> aicar_c		Transport, Extracellular	-1000	1000	BCc_ORPHAN
AKGDH	R_2_Oxogluterate_dehydrogenase	akg_c + coa_c + nad_c --> co2_c + nadh_c + succoa_c		Citric Acid Cycle	0	1000	( ( BCc_133 and BCc_184 and BCc_185 ) )
AKGt	R_2_Oxoglutarate_putative_transporter	akg_e <=> akg_c		Transport, Extracellular	-1000	1000	BCc_ORPHAN
ALAt	R_L_Alanine_putative_transporter	ala_L_e <=> ala_L_c		Transport, Extracellular	-1000	1000	BCc_ORPHAN
AMETt	R_S_Adenosyl_L_methionine_putative_transporter	amet_e <=> amet_c		Transport, Extracellular	-1000	1000	BCc_ORPHAN
AMPt	R_amp_putative_transporter	amp_e <=> amp_c		Transport, Extracellular	-1000	1000	BCc_ORPHAN
ANS	R_anthranilate_synthase	chor_c + gln_L_c --> anth_c + glu_L_c + h_c + pyr_c	4.1.3.27	Tyrosine Tryptophan and Phenylalanine Metabolism	0	1000	( ( BCc_pT01 and BCc_pT02 ) )
ANTHt	R_Anthranilate_putative_transporter	anth_e <=> anth_c		Transport, Extracellular	-1000	1000	BCc_ORPHAN
AOXSr2	R_8_amino_7_oxononanoate_synthase	ala_L_c + pimACP_c --> 8aonn_c + ACP_c + co2_c	2.3.1.47	Cofactor and Prosthetic Group Biosynthesis	0	1000	BCc_ORPHAN
ARGSL	R_argininosuccinate_lyase	argsuc_c <=> arg_L_c + fum_c	4.3.2.1	Arginine and Proline Metabolism	-1000	1000	( BCc_033 )
ARGSS	R_argininosuccinate_synthase	asp_L_c + atp_c + citr_L_c --> amp_c + argsuc_c + h_c + ppi_c	6.3.4.5	Arginine and Proline Metabolism	0	1000	( BCc_032 )
ARGt	R_L_Arginine_putative_transporter	arg_L_e <=> arg_L_c		Transport, Extracellular	-1000	1000	BCc_ORPHAN
ASAD	R_aspartate_semialdehyde_dehydrogenase	4pasp_c + h_c + nadph_c <=> aspsa_c + nadp_c + pi_c	1.2.1.11	Threonine and Lysine Metabolism	-1000	1000	( BCc_277 )
ASNt	R_asparagine_L_putative_transporter	asn_L_e <=> asn_L_c		Transport, Extracellular	-1000	1000	BCc_ORPHAN
ASPK	R_aspartate_kinase	asp_L_c + atp_c <=> 4pasp_c + adp_c	2.7.2.4	Threonine and Lysine Metabolism	-1000	1000	( BCc_127 )
ASPt	R_L_Aspartate_putative_transporter	asp_L_e <=> asp_L_c		Transport, Extracellular	-1000	1000	BCc_ORPHAN
ATPM	R_ATP_maintenance_requirement	atp_c + h2o_c --> adp_c + h_c + pi_c		Unassigned	0	100	SPONTANEOUS
ATPPRT	R_ATP_phosphoribosyltransferase	atp_c + prpp_c --> ppi_c + prbatp_c	2.4.2.17	Histidine Metabolism	0	1000	( BCc_063 )
BTNt	R_Biotin_putative_transport	btn_e <=> btn_c		Transport, Extracellular	-1000	1000	BCc_ORPHAN
C160SN	R_Fatty_acid_biosynthesis_n_C160_	actACP_c + 19.0 h_c + 6.0 malACP_c + 14.0 nadph_c --> 7.0 ACP_c + 6.0 co2_c + 6.0 h2o_c + 14.0 nadp_c + palm_c		Membrane Lipid Metabolism	0	1000	( ( BCc_056 and BCc_217 and BCc_167 and BCc_147 ) )
C180SN	R_Fatty_acid_biosynthesis_n_C180_	actACP_c + 22.0 h_c + 7.0 malACP_c + 16.0 nadph_c --> 8.0 ACP_c + 7.0 co2_c + 7.0 h2o_c + 16.0 nadp_c + ocdca_c		Membrane Lipid Metabolism	0	1000	( ( BCc_056 and BCc_217 and BCc_167 and BCc_147 ) )
C80SN	R_Fatty_acid_biosynthesis_n_C80_	actACP_c + 23.0 h_c + 7.0 malACP_c + 16.0 nadph_c --> 8.0 ACP_c + 7.0 co2_c + 8.0 h2o_c + 16.0 nadp_c + octa_c		Membrane Lipid Metabolism	0	1000	( ( BCc_056 and BCc_217 and BCc_167 and BCc_147 ) )
CBPS	R_carbamoyl_phosphate_synthase_glutamine_hydrolysing_	2.0 atp_c + gln_L_c + h2o_c + hco3_c --> 2.0 adp_c + cbp_c + glu_L_c + 2.0 h_c + pi_c	6.3.5.5	Arginine and Proline Metabolism	0	1000	( ( BCc_091 and BCc_090 ) )
CHORM	R_chorismate_mutase	chor_c --> pphn_c	5.4.99.5	Tyrosine Tryptophan and Phenylalanine Metabolism	0	1000	( BCc_244 )
CHORS	R_chorismate_synthase	3psme_c --> chor_c + pi_c	4.2.3.5	Tyrosine Tryptophan and Phenylalanine Metabolism	0	1000	( BCc_061 )
CO2t	R_CO2_diffusion	co2_e <=> co2_c		Transport, Extracellular	-1000	1000	SPONTANEOUS
COAt	R_Coenzyme_A_putative_transporter	coa_e <=> coa_c		Transport, Extracellular	-1000	1000	BCc_ORPHAN
CTPt	R_CTP_putative_transporter	ctp_e <=> ctp_c		Transport, Extracellular	-1000	1000	BCc_ORPHAN
CYSt	R_L_Cysteine_putative_transporter	cys_L_e <=> cys_L_c		Transport, Extracellular	-1000	1000	BCc_ORPHAN
CYTBO3	R_cytochrome_oxidase_bo3_ubiquinol_8_25_protons_	2.0 h_c + 0.5 o2_c + q8h2_c --> h2o_c + 2.0 h_e + q8_c		Oxidative Phosphorylation	0	1000	( ( BCc_288 and BCc_289 and BCc_290 and BCc_291 ) )
DAD5t	R_5_Deoxyadenosine_putative_transporter	dad_5_e <=> dad_5_c		Transport, Extracellular	-1000	1000	BCc_ORPHAN
DAPDC	R_diaminopimelate_decarboxylase	26dap_M_c + h_c --> co2_c + lys_L_c	4.1.1.20	Threonine and Lysine Metabolism	0	1000	( BCc_271 )
DAPE	R_diaminopimelate_epimerase	26dap_LL_c <=> 26dap_M_c	5.1.1.7	Threonine and Lysine Metabolism	-1000	1000	( BCc_380 )
dATPt	R_dATP_putative_transporter	datp_e <=> datp_c		Transport, Extracellular	-1000	1000	BCc_ORPHAN
dCTPt	R_dCTP_putative_transporter	dctp_e <=> dctp_c		Transport, Extracellular	-1000	1000	BCc_ORPHAN
DDPA	R_3_deoxy_D_arabino_heptulosonate_7_phosphate_synthetase	e4p_c + h2o_c + pep_c --> 2dda7p_c + pi_c	4.1.2.15	Tyrosine Tryptophan and Phenylalanine Metabolism	0	1000	( BCc_077 )
dGTPt	R_dGTP_putative_transporter	dgtp_e <=> dgtp_c		Transport, Extracellular	-1000	1000	BCc_ORPHAN
DHAD1	R_dihydroxy_acid_dehydratase_2_3_dihydroxy_3_methylbutanoate_	23dhmb_c --> 3mob_c + h2o_c	4.2.1.9	Valine Leucine and Isoleucine Metabolism	0	1000	( BCc_389 )
DHAD2	R_Dihydroxy_acid_dehydratase_2_3_dihydroxy_3_methylpentanoate_	23dhmp_c --> 3mop_c + h2o_c	4.2.1.9	Valine Leucine and Isoleucine Metabolism	0	1000	( BCc_389 )
DHDPRy	R_dihydrodipicolinate_reductase_NADPH_	23dhdp_c + h_c + nadph_c --> nadp_c + thdp_c	1.3.1.26	Threonine and Lysine Metabolism	0	1000	( BCc_092 )
DHDPS	R_dihydrodipicolinate_synthase	aspsa_c + pyr_c --> 23dhdp_c + 2.0 h2o_c + h_c	4.2.1.52	Threonine and Lysine Metabolism	0	1000	( BCc_060 )
DHQD	R_3_dehydroquinate_dehydratase	3dhq_c <=> 3dhsk_c + h2o_c	4.2.1.10	Tyrosine Tryptophan and Phenylalanine Metabolism	-1000	1000	( BCc_251 )
DHQS	R_3_dehydroquinate_synthase	2dda7p_c --> 3dhq_c + pi_c	4.2.3.4	Tyrosine Tryptophan and Phenylalanine Metabolism	0	1000	( BCc_352 )
dTTPt	R_dTTP_putative_transporter	dttp_e <=> dttp_c		Transport, Extracellular	-1000	1000	BCc_ORPHAN
EGMEACPR	R_Enoylglutaryl_[ACP]_methyl_ester_reductase	egmeACP_c + h_c + nadh_c --> gmeACP_c + nad_c	1.3.1.9	Cofactor and Prosthetic Group Biosynthesis	0	1000	BCc_167
ENO	R_enolase	2pg_c <=> h2o_c + pep_c	4.2.1.11	GlycolysisGluconeogenesis	-1000	1000	( BCc_264 )
EPMEACPR	R_Enoylpimeloyl_[ACP]_methyl_ester_reductase	epmeACP_c + h_c + nadh_c --> nad_c + pmeACP_c	1.3.1.9	Cofactor and Prosthetic Group Biosynthesis	0	1000	BCc_167
FADt	R_FAD_putative_transporter	fad_e <=> fad_c		Transport, Extracellular	-1000	1000	BCc_ORPHAN
FBA	R_fructose_bisphosphate_aldolase	fdp_c <=> dhap_c + g3p_c	4.1.2.13	GlycolysisGluconeogenesis	-1000	1000	( BCc_279 )
FRDPt	R_Farnesyl_diphosphate_putative_transporter	frdp_e <=> frdp_c		Transport, Extracellular	-1000	1000	BCc_ORPHAN
FUMt	R_Fumarate_putative_transporter	fum_e <=> fum_c		Transport, Extracellular	-1000	1000	BCc_ORPHAN
G6PDH2r	R_glucose_6_phosphate_dehydrogenase	g6p_c + nadp_c <=> 6pgl_c + h_c + nadph_c	1.1.1.49	Pentose Phosphate Pathway	-1000	1000	( BCc_199 )
G6Pt	R_M_D_Glucose_C6H11O9P_putative_transporter	g6p_e <=> g6p_c		Transport, Extracellular	-1000	1000	BCc_ORPHAN
GAPD	R_glyceraldehyde_3_phosphate_dehydrogenase	g3p_c + nad_c + pi_c <=> 13dpg_c + h_c + nadh_c	1.2.1.12	GlycolysisGluconeogenesis	-1000	1000	( BCc_181 )
GHMT2	R_glycine_hydroxymethyltransferase	ser_L_c + thf_c <=> gly_c + h2o_c + mlthf_c	2.1.2.1	Glycine and Serine Metabolism	-1000	1000	( BCc_178 )
GLNt	R_L_Glutamine_putative_transporter	gln_L_e <=> gln_L_c		Transport, Extracellular	-1000	1000	BCc_ORPHAN
GLUt	R_L_Glutamate_putative_transporter	glu_L_e <=> glu_L_c		Transport, Extracellular	-1000	1000	BCc_ORPHAN
GLYt	R_Glycine_putative_transporter	gly_e <=> gly_c		Transport, Extracellular	-1000	1000	BCc_ORPHAN
GND	R_phosphogluconate_dehydrogenase	6pgc_c + nadp_c --> co2_c + nadph_c + ru5p_D_c	1.1.1.44	Pentose Phosphate Pathway	0	1000	( BCc_071 )
GTPt	R_GTP_putative_transporter	gtp_e <=> gtp_c		Transport, Extracellular	-1000	1000	BCc_ORPHAN
H2Ot	R_H2O_diffussion	h2o_e <=> h2o_c		Transport, Extracellular	-1000	1000	(SPONTANEOUS)
H2St	R_H2S_diffusion	h2s_e <=> h2s_c		Transport, Extracellular	-1000	1000	(SPONTANEOUS)
HCO3E	R_HCO3_equilibration_reaction	co2_c + h2o_c <=> h_c + hco3_c	4.2.1.1	Unassigned	-1000	1000	(SPONTANEOUS)
HCYSt	R_L_Homocysteine_putative_transporter	hcys_L_e <=> hcys_L_c		Transport, Extracellular	-1000	1000	BCc_ORPHAN
HEMEOS	R_Heme_O_synthase	frdp_c + h2o_c + pheme_c --> hemeO_c + ppi_c	2.5.1.-	Cofactor and Prosthetic Group Biosynthesis	0	1000	( BCc_287 )
HISt	R_L_Histidine_putative_transporter	his_L_e <=> his_L_c		Transport, Extracellular	-1000	1000	BCc_ORPHAN
HISTD	R_histidinol_dehydrogenase	h2o_c + histd_c + 2.0 nad_c --> 3.0 h_c + his_L_c + 2.0 nadh_c	1.1.1.23	Histidine Metabolism	0	1000	( BCc_064 )
HISTP	R_histidinol_phosphatase	h2o_c + hisp_c --> histd_c + pi_c	3.1.3.15	Histidine Metabolism	0	1000	( BCc_066 )
HSDy	R_homoserine_dehydrogenase_NADPH_	aspsa_c + h_c + nadph_c <=> hom_L_c + nadp_c	1.1.1.3	Threonine and Lysine Metabolism	-1000	1000	( BCc_127 )
HSK	R_homoserine_kinase	atp_c + hom_L_c --> adp_c + h_c + phom_c	2.7.1.39	Threonine and Lysine Metabolism	0	1000	( BCc_126 )
HSTPT	R_histidinol_phosphate_transaminase	glu_L_c + imacp_c --> akg_c + hisp_c	2.6.1.9	Histidine Metabolism	0	1000	( BCc_065 )
IG3PS	R_Imidazole_glycerol_3_phosphate_synthase	gln_L_c + prlp_c --> aicar_c + eig3p_c + glu_L_c + h_c	2.4.2.-	Histidine Metabolism	0	1000	( ( BCc_067 and BCc_069 ) )
IGPDH	R_imidazoleglycerol_phosphate_dehydratase	eig3p_c --> h2o_c + imacp_c	4.2.1.19	Histidine Metabolism	0	1000	( BCc_066 )
ILEt	R_L_Isoleucine_putative_transporter	ile_L_e <=> ile_L_c		Transport, Extracellular	-1000	1000	BCc_ORPHAN
ILETA	R_isoleucine_transaminase	3mop_c + glu_L_c <=> akg_c + ile_L_c	2.6.1.42	Valine Leucine and Isoleucine Metabolism	-1000	1000	BCc_ORPHAN
IPMD	R_3_isopropylmalate_dehydrogenase	3c2hmp_c + nad_c --> 3c4mop_c + h_c + nadh_c	1.1.1.85	Valine Leucine and Isoleucine Metabolism	0	1000	( BCc_pL03 )
IPPMIa	R_3_isopropylmalate_dehydratase	3c2hmp_c <=> 2ippm_c + h2o_c	4.2.1.33	Valine Leucine and Isoleucine Metabolism	-1000	1000	( ( BCc_pL05 and BCc_pL04 ) )
IPPMIb	R_2_isopropylmalate_hydratase	2ippm_c + h2o_c <=> 3c3hmp_c	4.2.1.33	Valine Leucine and Isoleucine Metabolism	-1000	1000	( ( BCc_pL05 and BCc_pL04 ) )
IPPS	R_2_isopropylmalate_synthase	3mob_c + accoa_c + h2o_c --> 3c3hmp_c + coa_c + h_c	2.3.3.13	Valine Leucine and Isoleucine Metabolism	0	1000	( BCc_pL01 )
KARA1i	R_acetohydroxy_acid_isomeroreductase	alac_S_c + h_c + nadph_c <=> 23dhmb_c + nadp_c	1.1.1.86	Valine Leucine and Isoleucine Metabolism	-1000	1000	( BCc_388 )
KARA2i	R_ketol_acid_reductoisomerase_2_Aceto_2_hydroxybutanoate_	2ahbut_c + h_c + nadph_c <=> 23dhmp_c + nadp_c	1.1.1.86	Valine Leucine and Isoleucine Metabolism	-1000	1000	( BCc_388 )
KAS14	R_beta_ketoacyl_ACP_synthase	acACP_c + h_c + malACP_c --> ACP_c + actACP_c + co2_c	2.3.1.41	Membrane Lipid Metabolism	0	1000	( BCc_056 )
LEUt	R_L_Leucine_putative_transporter	leu_L_e <=> leu_L_c		Transport, Extracellular	-1000	1000	BCc_ORPHAN
LEUTAi	R_leucine_transaminase	4mop_c + glu_L_c <=> akg_c + leu_L_c	2.6.1.42	Valine Leucine and Isoleucine Metabolism	-1000	1000	BCc_ORPHAN
LIPOPBt	R_lipoate_putative_transporter	lipopb_c --> lipopb_e		Transport, Extracellular	0	1000	BCc_ORPHAN
LIPOS	R_Lipoate_synthase	2.0 amet_c + 2.0 h2s_c + nad_c + octapb_c --> 2.0 dad_5_c + 3.0 h_c + lipopb_c + 2.0 met_L_c + nadh_c	2.8.1.8	Cofactor and Prosthetic Group Biosynthesis	0	1000	BCc_170
LYSt	R_L_Lysine_putative_transporter	lys_L_e <=> lys_L_c		Transport, Extracellular	-1000	1000	BCc_ORPHAN
MACPD	R_Malonyl_ACP_decarboxylase	h_c + malACP_c --> acACP_c + co2_c	2.3.1.-	Membrane Lipid Metabolism	0	1000	( BCc_056 )
MALCOAMT	R_Malonyl_CoA_methyltransferase	amet_c + malcoa_c --> ahcys_c + malcoame_c	2.1.1.197	Cofactor and Prosthetic Group Biosynthesis	0	1000	BCc_ORPHAN
malcoat	R_MalonylCoA_putative_transporter	malcoa_e <=> malcoa_c		Transport, Extracellular	-1000	1000	BCc_ORPHAN
MCOATA	R_Malonyl_CoA_ACP_transacylase	ACP_c + malcoa_c <=> coa_c + malACP_c	2.3.1.39	Membrane Lipid Metabolism	-1000	1000	( BCc_216 )
MEOHt	R_methanol_transport_difussion	meoh_e <=> meoh_c		Transport, Extracellular	-1000	1000	SPONTANEOUS
METS	R_methionine_synthase	5mthf_c + hcys_L_c --> h_c + met_L_c + thf_c	2.1.1.13	Methionine Metabolism	0	1000	( BCc_017 )
METt	R_L_Methionine_putative_transporter	met_L_e <=> met_L_c		Transport, Extracellular	-1000	1000	BCc_ORPHAN
MTHFC	R_methenyltetrahydrofolate_cyclohydrolase	h2o_c + methf_c <=> 10fthf_c + h_c	3.5.4.9	Folate Metabolism	-1000	1000	( BCc_305 )
MTHFD	R_methylenetetrahydrofolate_dehydrogenase_NADP_	mlthf_c + nadp_c <=> methf_c + nadph_c	1.5.1.5	Folate Metabolism	-1000	1000	( BCc_305 )
MTHFR2	R_5_10_methylenetetrahydrofolate_reductase_NADH_	2.0 h_c + mlthf_c + nadh_c --> 5mthf_c + nad_c	1.5.1.20	Folate Metabolism	0	1000	( BCc_030 )
NADH16	R_NADH_dehydrogenase_ubiquinone_8_35_protons_	4.0 h_c + nadh_c + q8_c --> 3.0 h_e + nad_c + q8h2_c	1.6.5.11	Oxidative Phosphorylation	0	1000	( ( BCc_109 and BCc_108 and BCc_107 and BCc_106 and BCc_105 and BCc_104 and BCc_103 and BCc_102 and BCc_101 and BCc_100 and BCc_099 and BCc_098 and BCc_097 ) )
NADH5	R_NADH_dehydrogenase_ubiquinone_8_35_protons_	h_c + nadh_c + q8_c --> nad_c + q8h2_c	1.6.5.3	Oxidative Phosphorylation	0	1000	( ( BCc_109 and BCc_108 and BCc_107 and BCc_106 and BCc_105 and BCc_104 and BCc_103 and BCc_102 and BCc_101 and BCc_100 and BCc_099 and BCc_098 and BCc_097 ) )
NADPt	R_Nicotinamide_adenine_dinucleotide_phosphate_putative_transporter	nadp_e <=> nadp_c		Transport, Extracellular	-1000	1000	BCc_ORPHAN
NADt	R_Nicotinamide_adenine_dinucleotide_putative_transporter	nad_e <=> nad_c		Transport, Extracellular	-1000	1000	BCc_ORPHAN
NH4t	R_Ammonia_diffusion	nh4_e <=> nh4_c		Transport, Extracellular	-1000	1000	(SPONTANEOUS)
O2t	R_o2_transport_(diffusion)	o2_e <=> o2_c		Transport, Extracellular	-1000	1000	(SPONTANEOUS)
OCBT	R_ornithine_carbamoyltransferase	cbp_c + orn_c <=> citr_L_c + h_c + pi_c	2.1.3.3	Arginine and Proline Metabolism	-1000	1000	( BCc_224 )
OCTNLL	R_Octanoate_non_lipoylated_apo_domain_ligase	atp_c + h_c + octa_c --> amp_c + octapb_c + ppi_c	2.3.1.181	Cofactor and Prosthetic Group Biosynthesis	0	1000	(BCc_169)
OGMEACPD	R_3_Oxo_glutaryl_[ACP]_methyl_ester_dehydratase	hgmeACP_c --> egmeACP_c + h2o_c	4.2.1.59	Cofactor and Prosthetic Group Biosynthesis	0	1000	BCc_147
OGMEACPR	R_3_Oxo_glutaryl_[ACP]_methyl_ester_reductase	h_c + nadph_c + ogmeACP_c --> hgmeACP_c + nadp_c	1.1.1.100	Cofactor and Prosthetic Group Biosynthesis	0	1000	BCc_217
OGMEACPS	R_3_Oxo_glutaryl_[ACP]_methyl_ester_synthase	h_c + malACP_c + malcoame_c --> co2_c + coa_c + ogmeACP_c	2.3.1.41	Cofactor and Prosthetic Group Biosynthesis	0	1000	BCc_056
OMCDC	R_2_Oxo_4_methyl_3_carboxypentanoate_decarboxylation	3c4mop_c + h_c --> 4mop_c + co2_c	1.1.1.85	Valine Leucine and Isoleucine Metabolism	0	1000	( BCc_pL03 )
OPMEACPD	R_3_Oxo_pimeloyl_[ACP]_methyl_ester_dehydratase	hpmeACP_c --> epmeACP_c + h2o_c	4.2.1.59	Cofactor and Prosthetic Group Biosynthesis	0	1000	BCc_147
OPMEACPR	R_3_Oxo_pimeloyl_[ACP]_methyl_ester_reductase	h_c + nadph_c + opmeACP_c --> hpmeACP_c + nadp_c	1.1.1.100	Cofactor and Prosthetic Group Biosynthesis	0	1000	BCc_217
OPMEACPS	R_3_Oxo_pimeloyl_[ACP]_methyl_ester_synthase	gmeACP_c + h_c + malACP_c --> ACP_c + co2_c + opmeACP_c	2.3.1.41	Cofactor and Prosthetic Group Biosynthesis	0	1000	BCc_056
ORNITHINEt	R_Ornithine_putative_transporter	orn_e <=> orn_c		Transport, Extracellular	-1000	1000	BCc_ORPHAN
PDH	R_pyruvate_dehydrogenase	coa_c + nad_c + pyr_c --> accoa_c + co2_c + nadh_c	2.3.1.12	GlycolysisGluconeogenesis	0	1000	( ( BCc_131 and BCc_132 and BCc_133 ) )
PFK	R_phosphofructokinase	atp_c + f6p_c --> adp_c + fdp_c + h_c	2.7.1.11	GlycolysisGluconeogenesis	0	1000	( BCc_187 )
PGI	R_glucose_6_phosphate_isomerase	g6p_c <=> f6p_c	5.3.1.9	GlycolysisGluconeogenesis	-1000	1000	( BCc_372 )
PGK	R_phosphoglycerate_kinase	13dpg_c + adp_c <=> 3pg_c + atp_c	2.7.2.3	GlycolysisGluconeogenesis	-1000	1000	( BCc_278 )
PGL	R_6_phosphogluconolactonase	6pgl_c + h2o_c --> 6pgc_c + h_c	3.1.1.31	Pentose Phosphate Pathway	0	1000	( BCc_179 )
PGM	R_phosphoglycerate_mutase	2pg_c <=> 3pg_c	5.4.2.1	GlycolysisGluconeogenesis	-1000	1000	( BCc_186 )
PHEMEt	R_Protoheme_putative_transporter	pheme_e <=> pheme_c		Transport, Extracellular	-1000	1000	BCc_ORPHAN
PHEt	R_L_Phenylalanine_putative_transporter	phe_L_e <=> phe_L_c		Transport, Extracellular	-1000	1000	BCc_ORPHAN
PHETA	R_phenylalanine_transaminase	akg_c + phe_L_c <=> glu_L_c + phpyr_c	2.6.1.58	Tyrosine Tryptophan and Phenylalanine Metabolism	-1000	1000	BCc_ORPHAN
PIt	R_Phosphate_putative_transporter	pi_e <=> pi_c		Transport, Extracellular	-1000	1000	BCc_ORPHAN
PMEACPE	R_Pimeloyl_[ACP]_methyl_ester_esterase	h2o_c + pmeACP_c --> meoh_c + pimACP_c	3.1.1.85	Cofactor and Prosthetic Group Biosynthesis	0	1000	BCc_356
PPA	R_inorganic_diphosphatase	h2o_c + ppi_c --> h_c + 2.0 pi_c	3.6.1.1	Anaplerotic reactions	0	1000	( BCc_053 )
PPNDH	R_prephenate_dehydratase	h_c + pphn_c --> co2_c + h2o_c + phpyr_c	4.2.1.51	Tyrosine Tryptophan and Phenylalanine Metabolism	0	1000	( BCc_244 )
PRAMPC	R_phosphoribosyl_AMP_cyclohydrolase	h2o_c + prbamp_c --> prfp_c	3.5.4.19	Histidine Metabolism	0	1000	( BCc_070 )
PRATPP	R_phosphoribosyl_ATP_pyrophosphatase	h2o_c + prbatp_c --> h_c + ppi_c + prbamp_c	3.6.1.31	Histidine Metabolism	0	1000	( BCc_070 )
PRMICIi	R_1_5_phosphoribosyl_5_5_phosphoribosylamino_methylideneamino_imidazole_4_carboxamide_isomerase_reversible_	prfp_c <=> prlp_c	5.3.1.16	Histidine Metabolism	-1000	1000	( BCc_068 )
PROt	R_L_proline_putative_transporter	pro_L_e <=> pro_L_c		Transport, Extracellular	-1000	1000	BCc_ORPHAN
PRPPS	R_phosphoribosylpyrophosphate_synthetase	atp_c + r5p_c <=> amp_c + h_c + prpp_c	2.7.6.1	Histidine Metabolism	-1000	1000	( BCc_110 )
PSCVT	R_3_phosphoshikimate_1_carboxyvinyltransferase	pep_c + skm5p_c <=> 3psme_c + pi_c	2.5.1.19	Tyrosine Tryptophan and Phenylalanine Metabolism	-1000	1000	( BCc_191 )
PTAr	R_phosphotransacetylase	accoa_c + pi_c <=> actp_c + coa_c	2.3.1.8	Pyruvate Metabolism	-1000	1000	( BCc_115 )
PYDX5Pt	R_Pyridoxal_5_phosphate_putative_transporter	pydx5p_e <=> pydx5p_c		Transport, Extracellular	-1000	1000	BCc_ORPHAN
PYK	R_pyruvate_kinase	adp_c + h_c + pep_c --> atp_c + pyr_c	2.7.1.40	GlycolysisGluconeogenesis	0	1000	( BCc_198 )
Q8t	R_Ubiquinone_8_putative_transporter	q8_e <=> q8_c		Transport, Extracellular	-1000	1000	BCc_ORPHAN
RIBFLVt	R_Riboflavin_putative_transporter	ribflv_e <=> ribflv_c		Transport, Extracellular	-1000	1000	BCc_ORPHAN
RPE	R_ribulose_5_phosphate_3_epimerase	ru5p_D_c <=> xu5p_D_c	5.1.3.1	Pentose Phosphate Pathway	-1000	1000	( BCc_351 )
RPI	R_ribose_5_phosphate_isomerase	r5p_c <=> ru5p_D_c	5.3.1.6	Pentose Phosphate Pathway	-1000	1000	( BCc_259 )
SDPDS	R_succinyl_diaminopimelate_desuccinylase	h2o_c + sl26da_c --> 26dap_LL_c + succ_c	3.5.1.18	Threonine and Lysine Metabolism	0	1000	( BCc_059 )
SDPTA	R_succinyldiaminopimelate_transaminase	akg_c + sl26da_c <=> glu_L_c + sl2a6o_c	2.6.1.17	Threonine and Lysine Metabolism	-1000	1000	BCc_192
SERt	R_L_Serine_putative_transporter	ser_L_e <=> ser_L_c		Transport, Extracellular	-1000	1000	BCc_ORPHAN
SHK3Dr	R_shikimate_dehydrogenase	3dhsk_c + h_c + nadph_c <=> nadp_c + skm_c	1.1.1.25	Tyrosine Tryptophan and Phenylalanine Metabolism	-1000	1000	( BCc_312 )
SHKK	R_shikimate_kinase	atp_c + skm_c --> adp_c + h_c + skm5p_c	2.7.1.71	Tyrosine Tryptophan and Phenylalanine Metabolism	0	1000	( BCc_353 )
SKMt	R_shikimate_putative_transporter	skm_e <=> skm_c		Transport, Extracellular	-1000	1000	BCc_ORPHAN
SUCCt	R_Succinate_putative_transporter	succ_e <=> succ_c		Transport, Extracellular	-1000	1000	BCc_ORPHAN
TALA	R_transaldolase	g3p_c + s7p_c <=> e4p_c + f6p_c	2.2.1.2	Pentose Phosphate Pathway	-1000	1000	( BCc_057 )
THDPS	R_tetrahydrodipicolinate_succinylase	h2o_c + succoa_c + thdp_c --> coa_c + sl2a6o_c	2.3.1.117	Threonine and Lysine Metabolism	0	1000	( BCc_140 )
THFt	R_Tetrahydrofolate_putative_transporter	thf_e <=> thf_c		Transport, Extracellular	-1000	1000	BCc_ORPHAN
THMPPt	R_Thiamine_diphosphate_putative_transporter	thmpp_e <=> thmpp_c		Transport, Extracellular	-1000	1000	BCc_ORPHAN
THRD_L	R_L_threonine_deaminase	thr_L_c --> 2obut_c + nh4_c	4.3.1.19	Valine Leucine and Isoleucine Metabolism	0	1000	BCc_ORPHAN
THRS	R_threonine_synthase	h2o_c + phom_c --> pi_c + thr_L_c	4.2.3.1	Threonine and Lysine Metabolism	0	1000	( BCc_125 )
THRt	R_L_Threonine_putative_transporter	thr_L_e <=> thr_L_c		Transport, Extracellular	-1000	1000	BCc_ORPHAN
TKT1	R_transketolase	r5p_c + xu5p_D_c <=> g3p_c + s7p_c	2.2.1.1	Pentose Phosphate Pathway	-1000	1000	( BCc_058 )
TKT2	R_transketolase	e4p_c + xu5p_D_c <=> f6p_c + g3p_c	2.2.1.1	Pentose Phosphate Pathway	-1000	1000	( BCc_058 )
TPI	R_triose_phosphate_isomerase	dhap_c <=> g3p_c	5.3.1.1	GlycolysisGluconeogenesis	-1000	1000	( BCc_188 )
TRPt	R_L_Tryptophan_putative_transporter	trp_L_e <=> trp_L_c		Transport, Extracellular	-1000	1000	BCc_ORPHAN
TYRLt	R_tyrosine_L_putative_transporter	tyr_L_e <=> tyr_L_c		Transport, Extracellular	-1000	1000	BCc_ORPHAN
UTPt	R_UTP_putative_transporter	utp_e <=> utp_c		Transport, Extracellular	-1000	1000	BCc_ORPHAN
VALt	R_L_Valine_putative_transporter	val_L_e <=> val_L_c		Transport, Extracellular	-1000	1000	BCc_ORPHAN
VALTA	R_valine_transaminase	akg_c + val_L_c <=> 3mob_c + glu_L_c	2.6.1.42	Valine Leucine and Isoleucine Metabolism	-1000	1000	BCc_ORPHAN
Biomass_whith_lipids_BCc	R_Biomass_whith_lipids_BCc	0.000223 10fthf_c + 0.000223 5mthf_c + 0.499149 ala_L_c + 0.000223 amet_c + 0.28742 arg_L_c + 0.234232 asn_L_c + 0.234232 asp_L_c + 54.119975 atp_c + 2e-05 btn_c + 0.000168 coa_c + 0.129799 ctp_c + 0.088988 cys_L_c + 0.024805 datp_c + 0.025612 dctp_c + 0.025612 dgtp_c + 0.024805 dttp_c + 0.000223 fad_c + 0.255712 gln_L_c + 0.255712 glu_L_c + 0.595297 gly_c + 0.209121 gtp_c + 48.752916 h2o_c + 0.0…		Growth	0	1000	UNIVERSAL

## Sheet: Exchanges
R_ID	Name	Reaction formula	LB	UB
EX_meoh_e	methanol exchange	meoh_e -->	0	1000
EX_8aonn_e	8-Amino-7-oxononanoate exchange	8aonn_e -->	0	1000
EX_aicar_e	R_AICAR_exchange	aicar_e -->	0	1000
EX_ac_e	R_Acetate_exchange	ac_e -->	0	1000
EX_akg_e	R_2_Oxoglutarate_exchange	akg_e -->	0	1000
EX_ala_L_e	R_L_Alanine_exchange	ala_L_e <--	-1	0
EX_amet_e	R_S-Adenosyl-L-methionine_exchange	amet_e <--	-1	0
EX_amp_e	R_amp_exchange	amp_e <--	-1	0
EX_anth_e	Anthranilate_exchange	anth_e -->	0	1000
EX_arg_L_e	R_L_Arginine_exchange	arg_L_e -->	0	1000
EX_asn_L_e	R_asparagine_L_exchange	asn_L_e <=>	-1	1000
EX_asp_L_e	R_L_Aspartate_exchange	asp_L_e <=>	-5	1000
EX_BCc_Biomass	EX_BCc_Biomass	BCc_Biomass_e -->	0	1000
EX_btn_e	Biotin exchange	btn_e <--	-1	0
EX_co2_e	R_CO2_exchange	co2_e -->	0	1000
EX_coa_e	R_Coenzyme_A_exchange	coa_e <=>	-1	1000
EX_ctp_e	R_CTP_exchange	ctp_e <--	-1	0
EX_cys_L_e	R_L_Cysteine_exchange	cys_L_e <--	-1	0
EX_dad_5_e	R_5_Deoxyadenosine_exchange	dad_5_e -->	0	1000
EX_datp_e	R_dATP_exchange	datp_e <--	-1	0
EX_dctp_e	R_dCTP_exchange	dctp_e <--	-1	0
EX_dgtp_e	R_dGTP_exchange	dgtp_e <--	-1	0
EX_dttp_e	R_dTTP_exchange	dttp_e <--	-1	0
EX_fad_e	R_FAD_exchange	fad_e <--	-1	0
EX_frdp_e	R_Farnesyl_diphosphate_exchange	frdp_e <--	-10	0
EX_fum_e	R_Fumarate_exchange	fum_e -->	0	1000
EX_g6p_e	EX_g6p_e	g6p_e <--	-10	0
EX_gln_L_e	R_L_Glutamine_exchange	gln_L_e <--	-10	0
EX_glu_L_e	R_L_Glutamate_exchange	glu_L_e -->	0	1000
EX_gly_e	R_Glycine_exchange	gly_e -->	0	1000
EX_gtp_e	R_GTP_exchange	gtp_e <--	-1	0
EX_h2o_e	R_H2O_exchange	h2o_e -->	0	1000
EX_h_e	R_Proton_exchange	h_e -->	0	1000
EX_hcys_L_e	R_L_Homocysteine_exchange	hcys_L_e <--	-10	0
EX_his_L_e	R_L_Histidine_exchange	his_L_e -->	0	1000
EX_ile_L_e	R_L_Isoleucine_exchange	ile_L_e -->	0	1000
EX_leu_L_e	R_L_Leucine_exchange	leu_L_e -->	0	1000
EX_lipopb_e	R_Lipoate_exchange	lipopb_e -->	0	1000
EX_lys_L_e	R_L_Lysine_exchange	lys_L_e -->	0	1000
EX_malcoa_e	R_MalonylCoA_exchange	malcoa_e <--	-10	0
EX_met_L_e	R_L_Methionine_exchange	met_L_e -->	0	1000
EX_nad_e	R_Nicotinamide_adenine_dinucleotide_exchange	nad_e <--	-1	0
EX_nadp_e	R_Nicotinamide_adenine_dinucleotide_phosphate_exchange	nadp_e <--	-1	0
EX_nh4_e	R_Ammonia_exchange	nh4_e -->	0	1000
EX_o2_e	R_O2_exchange	o2_e <--	-18.5	0
EX_orn_e	R_Ornithine_exchange	orn_e <--	-1	0
EX_phe_L_e	R_L_Phenylalanine_exchange	phe_L_e -->	0	1000
EX_pheme_e	R_Protoheme_exchange	pheme_e <--	-10	0
EX_pi_e	R_Phosphate_exchange	pi_e -->	0	1000
EX_pro_L_e	L-Proline exchange	pro_L_e <--	-1	0
EX_pydx5p_e	R_Pyridoxal 5-phosphate_exchange	pydx5p_e <--	-1	0
EX_q8_e	R_Ubiquinone_8_exchange	q8_e <--	-1	0
EX_ribflv_e	R_Riboflavin_exchange	ribflv_e <--	-1	0
EX_h2s_e	R_H2S_exchange	h2s_e <--	-1	0
EX_ser_L_e	R_L_Serine_exchange	ser_L_e <--	-10	0
EX_skm_e	R_Shikimate_exchange	skm_e -->	0	1000
EX_succ_e	R_Succinate_exchange	succ_e -->	0	1000
EX_thf_e	R_Tetrahydrofolate_exchange	thf_e <--	-1	0
EX_thmpp_e	R_Thiamine diphosphate_exchange	thmpp_e <--	-1	0
EX_thr_L_e	R_L_Threonine_exchange	thr_L_e -->	0	1000
EX_trp_L_e	R_L_Tryptophan_exchange	trp_L_e <--	-1	0
EX_tyr_L_e	R_tyrosine_L_exchange	tyr_L_e <--	-1	0
EX_utp_e	R_UTP_exchange	utp_e <--	-1	0
EX_val_L_e	R_L_Valine_exchange	val_L_e -->	0	1000
DM_ahcys_c	Sink for S-Adenosyl-L-homocysteine	ahcys_c -->		Cofactor and Prosthetic Group Biosynthesis	0	1000	BCc_ORPHAN

## Sheet: Metabolites
ID	Name	Formula	Charge
10fthf_c	M_10_Formyltetrahydrofolate	C20H21N7O7	-2
13dpg_c	M_3_Phospho_D_glyceroyl_phosphate	C3H4O10P2	-4
23dhdp_c	M_2_3_Dihydrodipicolinate	C7H5NO4	-2
23dhmb_c	M__R__2_3_Dihydroxy_3_methylbutanoate	C5H9O4	-1
23dhmp_c	M__R__2_3_Dihydroxy_3_methylpentanoate	C6H11O4	-1
26dap_LL_c	M_LL_2_6_Diaminoheptanedioate	C7H14N2O4	0
26dap_M_c	M_meso_2_6_Diaminoheptanedioate	C7H14N2O4	0
2ahbut_c	M__S__2_Aceto_2_hydroxybutanoate	C6H9O4	-1
2dda7p_c	M_2_Dehydro_3_deoxy_D_arabino_heptonate_7_phosphate	C7H10O10P	-3
2ippm_c	M_2_Isopropylmaleate	C7H8O4	-2
2obut_c	M_2_Oxobutanoate	C4H5O3	-1
2pg_c	M_D_Glycerate_2_phosphate	C3H4O7P	-3
3c2hmp_c	M_3_Carboxy_2_hydroxy_4_methylpentanoate	C7H10O5	-2
3c3hmp_c	M_3_Carboxy_3_hydroxy_4_methylpentanoate	C7H10O5	-2
3c4mop_c	M_3_Carboxy_4_methyl_2_oxopentanoate	C7H8O5	-2
3dhq_c	M_3_Dehydroquinate	C7H9O6	-1
3dhsk_c	M_3_Dehydroshikimate	C7H7O5	-1
3mob_c	M_3_Methyl_2_oxobutanoate	C5H7O3	-1
3mop_c	M__S__3_Methyl_2_oxopentanoate	C6H9O3	-1
3pg_c	M_3_Phospho_D_glycerate	C3H4O7P	-3
3psme_c	M_5_O__1_Carboxyvinyl__3_phosphoshikimate	C10H9O10P	-4
4mop_c	M_4_Methyl_2_oxopentanoate	C6H9O3	-1
4pasp_c	M_4_Phospho_L_aspartate	C4H6NO7P	-2
5mthf_c	M_5_Methyltetrahydrofolate	C20H24N7O6	-1
6pgc_c	M_6_Phospho_D_gluconate	C6H10O10P	-3
6pgl_c	M_6_phospho_D_glucono_1_5_lactone	C6H9O9P	-2
8aonn_c	8-Amino-7-oxononanoate	C9H17NO3	0
8aonn_e	8-Amino-7-oxononanoate	C9H17NO3	0
ac_c	M_Acetate	C2H3O2	-1
ac_e	M_Acetate	C2H3O2	-1
acACP_c	M_Acetyl_ACP	C13H23N2O8PRS	-1
accoa_c	M_Acetyl_CoA	C23H34N7O17P3S	-4
ACP_c	M_acyl_carrier_protein	C11H21N2O7PRS	-1
actACP_c	M_Acetoacetyl_ACP	C15H25N2O9PRS	-1
actp_c	M_Acetyl_phosphate	C2H3O5P	-2
adp_c	M_ADP	C10H12N5O10P2	-3
ahcys_c	S-Adenosyl-L-homocysteine	C14H20N6O5S	0
aicar_c	M_5_Amino_1__5_Phospho_D_ribosyl_imidazole_4_carboxamide	C9H13N4O8P	-2
aicar_e	M_5_Amino_1__5_Phospho_D_ribosyl_imidazole_4_carboxamide	C9H13N4O8P	-2
akg_c	M_2_Oxoglutarate	C5H4O5	-2
akg_e	M_2_Oxoglutarate	C5H4O5	-2
ala_L_c	M_L_Alanine	C3H7NO2	0
ala_L_e	M_L_Alanine	C3H7NO2	0
alac_S_c	M__S__2_Acetolactate	C5H7O4	-1
amet_c	S-Adenosyl-L-methionine	C15H23N6O5S	1
amet_e	S-Adenosyl-L-methionine	C15H23N6O5S	1
amp_c	M_AMP	C10H12N5O7P	-2
amp_e	M_AMP	C10H12N5O7P	-2
anth_c	M_Anthranilate	C7H6NO2	-1
anth_e	M_Anthranilate	C7H6NO2	-1
arg_L_c	M_L_Arginine	C6H15N4O2	1
arg_L_e	M_L_Arginine	C6H15N4O2	1
argsuc_c	M_N_omega___L_Arginino_succinate	C10H17N4O6	-1
asn_L_c	L-Asparagine	C4H8N2O3	0
asn_L_e	L-Asparagine	C4H8N2O3	0
asp_L_c	M_L_Aspartate	C4H6NO4	-1
asp_L_e	M_L_Aspartate	C4H6NO4	-1
aspsa_c	M_L_Aspartate_4_semialdehyde	C4H7NO3	0
atp_c	M_ATP	C10H12N5O13P3	-4
BCc_Biomass_e	BCc	Biomass	0
btn_c	Biotin	C10H15N2O3S	-1
btn_e	Biotin	C10H15N2O3S	-1
cbp_c	M_Carbamoyl_phosphate	CH2NO5P	-2
chor_c	M_chorismate	C10H8O6	-2
citr_L_c	M_L_Citrulline	C6H13N3O3	0
co2_c	M_CO2	CO2	0
co2_e	M_CO2	CO2	0
coa_c	M_Coenzyme_A	C21H32N7O16P3S	-4
coa_e	M_Coenzyme_A	C21H32N7O16P3S	-4
ctp_c	M_CTP	C9H12N3O14P3	-4
ctp_e	M_CTP	C9H12N3O14P3	-4
cys_L_c	M_L_Cysteine	C3H7NO2S	0
cys_L_e	M_L_Cysteine	C3H7NO2S	0
dad_5_c	M_5__Deoxyadenosine	C10H13N5O3	0
dad_5_e	M_5__Deoxyadenosine	C10H13N5O3	0
datp_c	M_dATP	C10H12N5O12P3	-4
datp_e	M_dATP	C10H12N5O12P3	-4
dctp_c	M_dCTP	C9H12N3O13P3	-4
dctp_e	M_dCTP	C9H12N3O13P3	-4
dgtp_c	M_dGTP	C10H12N5O13P3	-4
dgtp_e	M_dGTP	C10H12N5O13P3	-4
dhap_c	M_Dihydroxyacetone_phosphate	C3H5O6P	-2
dttp_c	M_dTTP	C10H13N2O14P3	-4
dttp_e	M_dTTP	C10H13N2O14P3	-4
e4p_c	M_D_Erythrose_4_phosphate	C4H7O7P	-2
egmeACP_c	Enoylglutaryl-[acyl-carrier protein] methyl ester	C17H27N2O10PRS	-1
eig3p_c	M_D_erythro_1__Imidazol_4_yl_glycerol_3_phosphate	C6H9N2O6P	-2
epmeACP_c	Enoylpimeloyl-[acyl-carrier protein] methyl ester	C19H31N2O10PRS	-1
f6p_c	M_D_Fructose_6_phosphate	C6H11O9P	-2
fad_c	Flavin adenine dinucleotide oxidized	C27H31N9O15P2	-2
fad_e	Flavin adenine dinucleotide oxidized	C27H31N9O15P2	-2
fdp_c	M_D_Fructose_1_6_bisphosphate	C6H10O12P2	-4
frdp_c	M_Farnesyl_diphosphate	C15H25O7P2	-3
frdp_e	M_Farnesyl_diphosphate	C15H25O7P2	-3
fum_c	M_Fumarate	C4H2O4	-2
fum_e	M_Fumarate	C4H2O4	-2
g3p_c	M_Glyceraldehyde_3_phosphate	C3H5O6P	-2
g6p_c	M_D_Glucose_6_phosphate	C6H11O9P	-2
g6p_e	M_D_Glucose_6_phosphate	C6H11O9P	-2
gln_L_c	M_L_Glutamine	C5H10N2O3	0
gln_L_e	M_L_Glutamine	C5H10N2O3	0
glu_L_c	M_L_Glutamate	C5H8NO4	-1
glu_L_e	M_L_Glutamate	C5H8NO4	-1
gly_c	M_Glycine	C2H5NO2	0
gly_e	M_Glycine	C2H5NO2	0
gmeACP_c	Glutaryl-[acyl-carrier protein] methyl ester	C17H29N2O10PRS	-1
gtp_c	M_GTP	C10H12N5O14P3	-4
gtp_e	M_GTP	C10H12N5O14P3	-4
h_c	M_H	H	1
h_e	M_H	H	1
h2o_c	M_H2O	H2O	0
h2o_e	M_H2O	H2O	0
h2s_c	Hydrogen sulfide	H2S	0
h2s_e	Hydrogen sulfide	H2S	0
hco3_c	M_Bicarbonate	CHO3	-1
hcys_L_c	M_L_Homocysteine	C4H9NO2S	0
hcys_L_e	M_L_Homocysteine	C4H9NO2S	0
hemeO_c	M_Heme_O	C49H56FeN4O5	-2
hgmeACP_c	3-Hydroxyglutaryl-[acyl-carrier protein] methyl ester	C17H29N2O11PRS	-1
his_L_c	M_L_Histidine	C6H9N3O2	0
his_L_e	M_L_Histidine	C6H9N3O2	0
hisp_c	M_L_Histidinol_phosphate	C6H11N3O4P	-1
histd_c	M_L_Histidinol	C6H12N3O	1
hom_L_c	M_L_Homoserine	C4H9NO3	0
hpmeACP_c	3-Hydroxypimeloyl-[acyl-carrier protein] methyl ester	C19H33N2O11PRS	-1
ile_L_c	M_L_Isoleucine	C6H13NO2	0
ile_L_e	M_L_Isoleucine	C6H13NO2	0
imacp_c	M_3__Imidazol_4_yl__2_oxopropyl_phosphate	C6H7N2O5P	-2
leu_L_c	M_L_Leucine	C6H13NO2	0
leu_L_e	M_L_Leucine	C6H13NO2	0
lipopb_c	lipoate	C8H13OS2	0
lipopb_e	lipoate	C8H13OS2	0
lys_L_c	M_L_Lysine	C6H15N2O2	1
lys_L_e	M_L_Lysine	C6H15N2O2	1
malACP_c	M_Malonyl_acyl_carrier_protein	C14H22N2O10PRS	-2
malcoa_c	M_Malonyl_CoA	C24H33N7O19P3S	-5
malcoa_e	M_Malonyl_CoA	C24H33N7O19P3S	-5
malcoame_c	malonyl-CoA methyl ester	C25H36N7O19P3S	-4
meoh_c	Methanol	CH4O	0
meoh_e	Methanol	CH4O	0
met_L_c	M_L_Methionine	C5H11NO2S	0
met_L_e	M_L_Methionine	C5H11NO2S	0
methf_c	M_5_10_Methenyltetrahydrofolate	C20H20N7O6	-1
mlthf_c	M_5_10_Methylenetetrahydrofolate	C20H21N7O6	-2
nad_c	M_Nicotinamide_adenine_dinucleotide	C21H26N7O14P2	-1
nad_e	M_Nicotinamide_adenine_dinucleotide	C21H26N7O14P2	-1
nadh_c	M_Nicotinamide_adenine_dinucleotide___reduced	C21H27N7O14P2	-2
nadp_c	M_Nicotinamide_adenine_dinucleotide_phosphate	C21H25N7O17P3	-3
nadp_e	M_Nicotinamide_adenine_dinucleotide_phosphate	C21H25N7O17P3	-3
nadph_c	M_Nicotinamide_adenine_dinucleotide_phosphate___reduced	C21H26N7O17P3	-4
nh4_c	M_Ammonium	H4N	1
nh4_e	M_Ammonium	H4N	1
o2_c	M_O2	O2	0
o2_e	M_O2	O2	0
ocdca_c	M_Octadecanate__n_C180_	C18H35O2	-1
octa_c	M_Octanoate__n_C80_	C8H15O2	-1
octapb_c	octanoate_protein_bound_	C8H15O	1
ogmeACP_c	3-Oxo-glutaryl-[acyl-carrier protein] methyl ester	C17H27N2O11PRS	-1
opmeACP_c	3-Oxo-pimeloyl-[acyl-carrier protein] methyl ester	C19H31N2O11PRS	-1
orn_c	M_Ornithine	C5H13N2O2	1
orn_e	M_Ornithine	C5H13N2O2	1
palm_c	M_Palmitate__n_C160_	C16H31O2	-1
pep_c	M_Phosphoenolpyruvate	C3H2O6P	-3
phe_L_c	M_L_Phenylalanine	C9H11NO2	0
phe_L_e	M_L_Phenylalanine	C9H11NO2	0
pheme_c	M_Protoheme	C34H30FeN4O4	-2
pheme_e	M_Protoheme	C34H30FeN4O4	-2
phom_c	M_O_Phospho_L_homoserine	C4H8NO6P	-2
phpyr_c	M_Phenylpyruvate	C9H7O3	-1
pi_c	M_Phosphate	HO4P	-2
pi_e	M_Phosphate	HO4P	-2
pimACP_c	Pimeloyl-[acyl-carrier protein]	C18H31N2O10PRS	-1
pmeACP_c	Pimeloyl-[acyl-carrier protein] methyl ester	C19H33N2O10PRS	-1
pphn_c	M_Prephenate	C10H8O6	-2
ppi_c	M_Diphosphate	HO7P2	-3
prbamp_c	M_1__5_Phosphoribosyl__AMP	C15H19N5O14P2	-4
prbatp_c	M_1__5_Phosphoribosyl__ATP	C15H19N5O20P4	-6
prfp_c	M_1__5_Phosphoribosyl__5__5_phosphoribosylamino_methylideneaminoimidazole_4_carboxamide	C15H21N5O15P2	-4
prlp_c	M_5__5_phospho_1_deoxyribulos_1_ylamino_methylideneamino_1__5_phosphoribosyl_imidazole_4_carboxamide	C15H21N5O15P2	-4
pro_L_c	L-Proline	C5H9NO2	0
pro_L_e	L-Proline	C5H9NO2	0
prpp_c	M_5_Phospho_alpha_D_ribose_1_diphosphate	C5H8O14P3	-5
pydx5p_c	Pyridoxal 5-phosphate	C8H8NO6P	-2
pydx5p_e	Pyridoxal 5-phosphate	C8H8NO6P	-2
pyr_c	M_Pyruvate	C3H3O3	-1
q8_c	M_Ubiquinone_8	C49H74O4	0
q8_e	M_Ubiquinone_8	C49H74O4	0
q8h2_c	M_Ubiquinol_8	C49H76O4	0
r5p_c	M_alpha_D_Ribose_5_phosphate	C5H9O8P	-2
ribflv_c	Riboflavin	C17H20N4O6	0
ribflv_e	Riboflavin	C17H20N4O6	0
ru5p_D_c	M_D_Ribulose_5_phosphate	C5H9O8P	-2
s7p_c	M_Sedoheptulose_7_phosphate	C7H13O10P	-2
ser_L_c	M_L_Serine	C3H7NO3	0
ser_L_e	M_L_Serine	C3H7NO3	0
skm_c	M_Shikimate	C7H9O5	-1
skm_e	M_Shikimate	C7H9O5	-1
skm5p_c	M_Shikimate_5_phosphate	C7H8O8P	-3
sl26da_c	M_N_Succinyl_LL_2_6_diaminoheptanedioate	C11H16N2O7	-2
sl2a6o_c	M_N_Succinyl_2_L_amino_6_oxoheptanedioate	C11H12NO8	-3
succ_c	M_Succinate	C4H4O4	-2
succ_e	M_Succinate	C4H4O4	-2
succoa_c	M_Succinyl_CoA	C25H35N7O19P3S	-5
thdp_c	M_2_3_4_5_Tetrahydrodipicolinate	C7H7NO4	-2
thf_c	M_5_6_7_8_Tetrahydrofolate	C19H21N7O6	-2
thf_e	M_5_6_7_8_Tetrahydrofolate	C19H21N7O6	-2
thmpp_c	Thiamine diphosphate	C12H16N4O7P2S	-2
thmpp_e	Thiamine diphosphate	C12H16N4O7P2S	-2
thr_L_c	M_L_Threonine	C4H9NO3	0
thr_L_e	M_L_Threonine	C4H9NO3	0
trp_L_c	M_L_Tryptophan	C11H12N2O2	0
trp_L_e	M_L_Tryptophan	C11H12N2O2	0
tyr_L_c	L-Tyrosine	C9H11NO3	0
tyr_L_e	L-Tyrosine	C9H11NO3	0
utp_c	M_UTP	C9H11N2O15P3	-4
utp_e	M_UTP	C9H11N2O15P3	-4
val_L_c	M_L_Valine	C5H11NO2	0
val_L_e	M_L_Valine	C5H11NO2	0
xu5p_D_c	M_D_Xylulose_5_phosphate	C5H9O8P	-2

## Sheet: Removed reactions
Gene	EC Number	Comment
BCc_367	3.6.1.19	Removed: Nucleotide salvage pathway, isolated
BCc_031	2.7.2.8	Removed: ornithine síntesis, isolated (ornithine imported)
BCc_039	6.5.1.2	Removed: DNA ligase wrong annotated as 3.6.1.22)
BCc_144	2.7.4.14	Removed: Nucleotide salvage pathway, isolated
BCc_042	6.1.1.17	Removed: tRNA charging gene, out of scope
BCc_161	2.7.8.7	Removed: acyl carrier protein synthase, out of scope
BCc_175	3.1.3.25	Removed: inositol fosfatase, isolated
BCc_194	1.8.1.9	Removed: thioredoxin reductase,out of the socpe
