# Supplementary material for: Determinism and Contingency Shape Metabolic Complementation in an Endosymbiotic Consortium
Source: Front Microbiol. 2017 Nov 22;8:2290. doi: 10.3389/fmicb.2017.02290 (PMC5702781; doi:10.3389/fmicb.2017.02290)
Supplement: Supplementary Table S3 — Genome-scale metabolic model of endosymbiotic consortium of the cedar aphid C. cedri iBSCc. The file corresponds to the representation of the iBSCc model in spreadsheet format, and includes the following fiver sheets: (i) the list of reactions; (ii) listing of exchange fluxes; (iii) listing of metabolites; (iv) the optimal flux distribution that maximizes the growth of the whole system; and (v) the exchange patterns between the consortium members. [file Table3.XLSX]

## Sheet: Reactions
R_ID	Name	Reaction formula	Subsystem	EC Number	LB	UB	Gene_reaction_rule
System_growth	System_growth	0.9 Aphid_Cc_Biomass_e + 0.05 BCc_Biomass_e + 0.05 SCc_Biomass_e -->	Growth		0	1000	UNIVERSAL
Aphid_Cc_Biomass	Aphid_Cc_Biomass	0.23386887 arg_L_e + 2e-06 btn_e + 0.062365032 cys_L_e + 0.000223 fad_e + 0.093547548 his_L_e + 0.306628074 ile_L_e + 0.436555224 leu_L_e + 3e-06 lipopb_e + 0.400175622 lys_L_e + 0.119532978 met_L_e + 0.197489268 phe_L_e + 0.000446 pheme_e + 0.000223 pydx5p_e + 0.000223 ribflv_e + 0.000669 thf_e + 0.000223 thmpp_e + 0.280642644 thr_L_e + 0.041576688 trp_L_e + 0.166306752 tyr_L_e + 0.374190192 val…	Aphid Metabolism		0	1000	Ccedri
Aphid_Cc_cys2amet	Aphid_Cc_cys2amet	cys_L_e --> amet_e	Aphid Metabolism		0	1000	Ccedri
Aphid_Cc_cys2hcys	Aphid_Cc_cys2hcys	cys_L_e --> hcys_L_e	Aphid Metabolism		0	1000	Ccedri
Aphid_Cc_cys2met	Aphid_Cc_cys2met	cys_L_e --> met_L_e	Aphid Metabolism		0	1000	Ccedri
Aphid_Cc_H2S2lipopb	Aphid_Cc_H2S2lipopb	2.0 h2s_e --> lipopb_e	Aphid Metabolism		0	1000	Ccedri
Aphid_Cc_phe2tyr	Aphid_Cc_phe2tyr	phe_L_e --> tyr_L_e	Aphid Metabolism		0	1000	Ccedri
BCc_8AONNt	8-amino-7-oxononanoate synthase	BCc_8aonn_bcc --> 8aonn_e	Cofactor and Prosthetic Group Biosynthesis	2.3.1.47	0	1000	BCc_ORPHAN
BCc_ACHBS	R_2_aceto_2_hydroxybutanoate_synthase	BCc_2obut_bcc + BCc_h_bcc + BCc_pyr_bcc --> BCc_2ahbut_bcc + BCc_co2_bcc	Valine Leucine and Isoleucine Metabolism	2.2.1.6	0	1000	( ( BCc_139 and BCc_138 ) )
BCc_ACKr	R_acetate_kinase	BCc_ac_bcc + BCc_atp_bcc <=> BCc_actp_bcc + BCc_adp_bcc	Pyruvate Metabolism	2.7.2.1	-1000	1000	( BCc_114 )
BCc_ACLS	R_acetolactate_synthase	BCc_h_bcc + 2.0 BCc_pyr_bcc --> BCc_alac_S_bcc + BCc_co2_bcc	Valine Leucine and Isoleucine Metabolism	4.1.3.18	0	1000	( ( BCc_139 and BCc_138 ) )
BCc_ACt	R_Acetate_putative_transporter	ac_e --> BCc_ac_bcc	Transport, Extracellular		0	1000	BCc_ORPHAN
BCc_ADK1	R_adenylate_kinase	BCc_amp_bcc + BCc_atp_bcc --> 2.0 BCc_adp_bcc	Nucleotide Salvage Pathway	2.7.4.3	0	1000	( BCc_303 )
BCc_AICARt	R_AICAR_putative_transporter	BCc_aicar_bcc --> aicar_e	Transport, Extracellular		0	1000	BCc_ORPHAN
BCc_AKGDH	R_2_Oxogluterate_dehydrogenase	BCc_akg_bcc + BCc_coa_bcc + BCc_nad_bcc --> BCc_co2_bcc + BCc_nadh_bcc + BCc_succoa_bcc	Citric Acid Cycle		0	1000	( ( BCc_133 and BCc_184 and BCc_185 ) )
BCc_AKGt	R_2_Oxoglutarate_putative_transporter	BCc_akg_bcc --> akg_e	Transport, Extracellular		0	1000	BCc_ORPHAN
BCc_ALAt	R_L_Alanine_putative_transporter	ala_L_e --> BCc_ala_L_bcc	Transport, Extracellular		0	1000	BCc_ORPHAN
BCc_AMETt	R_S-Adenosyl-L-methionine_putative_transporter	amet_e --> BCc_amet_bcc	Transport, Extracellular		0	1000	BCc_ORPHAN
BCc_AMPt	R_amp_putative_transporter	amp_e --> BCc_amp_bcc	Transport, Extracellular		0	1000	BCc_ORPHAN
BCc_ANS	R_anthranilate_synthase	BCc_chor_bcc + BCc_gln_L_bcc --> BCc_anth_bcc + BCc_glu_L_bcc + BCc_h_bcc + BCc_pyr_bcc	Tyrosine Tryptophan and Phenylalanine Metabolism	4.1.3.27	0	1000	( ( BCc_pT01 and BCc_pT02 ) )
BCc_ANTHt	Anthranilate_putative_transporter	BCc_anth_bcc --> anth_e	Transport, Extracellular		0	1000	BCc_ORPHAN
BCc_AOXSr2	8-amino-7-oxononanoate synthase	BCc_ala_L_bcc + BCc_pimACP_bcc --> BCc_8aonn_bcc + BCc_ACP_bcc + BCc_co2_bcc	Cofactor and Prosthetic Group Biosynthesis	2.3.1.47	0	1000	BCc_ORPHAN
BCc_ARGSL	R_argininosuccinate_lyase	BCc_argsuc_bcc --> BCc_arg_L_bcc + BCc_fum_bcc	Arginine and Proline Metabolism	4.3.2.1	0	1000	( BCc_033 )
BCc_ARGSS	R_argininosuccinate_synthase	BCc_asp_L_bcc + BCc_atp_bcc + BCc_citr_L_bcc --> BCc_amp_bcc + BCc_argsuc_bcc + BCc_h_bcc + BCc_ppi_bcc	Arginine and Proline Metabolism	6.3.4.5	0	1000	( BCc_032 )
BCc_ARGt	R_L_Arginine_putative_transporter	BCc_arg_L_bcc --> arg_L_e	Transport, Extracellular		0	1000	BCc_ORPHAN
BCc_ASAD	R_aspartate_semialdehyde_dehydrogenase	BCc_4pasp_bcc + BCc_h_bcc + BCc_nadph_bcc --> BCc_aspsa_bcc + BCc_nadp_bcc + BCc_pi_bcc	Threonine and Lysine Metabolism	1.2.1.11	0	1000	( BCc_277 )
BCc_ASNt	R_asparagine_L_putative_transporter	asn_L_e --> BCc_asn_L_bcc	Transport, Extracellular		0	1000	BCc_ORPHAN
BCc_ASPK	R_aspartate_kinase	BCc_asp_L_bcc + BCc_atp_bcc --> BCc_4pasp_bcc + BCc_adp_bcc	Threonine and Lysine Metabolism	2.7.2.4	0	1000	( BCc_127 )
BCc_ASPt	R_L_Aspartate_putative_transporter	asp_L_e --> BCc_asp_L_bcc	Transport, Extracellular		0	1000	BCc_ORPHAN
BCc_ATPM	ATP maintenance requirement	BCc_atp_bcc + BCc_h2o_bcc --> BCc_adp_bcc + BCc_h_bcc + BCc_pi_bcc	Unassigned		0	100	SPONTANEOUS
BCc_ATPPRT	R_ATP_phosphoribosyltransferase	BCc_atp_bcc + BCc_prpp_bcc --> BCc_ppi_bcc + BCc_prbatp_bcc	Histidine Metabolism	2.4.2.17	0	1000	( BCc_063 )
BCc_BTNt	Biotin_putative_transport	btn_e --> BCc_btn_bcc	Transport, Extracellular		0	1000	BCc_ORPHAN
BCc_Biomass_whith_lipids_BCc	Biomass_whith_lipids_BCc	0.000223 BCc_10fthf_bcc + 0.000223 BCc_5mthf_bcc + 0.499149 BCc_ala_L_bcc + 0.000223 BCc_amet_bcc + 0.28742 BCc_arg_L_bcc + 0.234232 BCc_asn_L_bcc + 0.234232 BCc_asp_L_bcc + 54.119975 BCc_atp_bcc + 2e-05 BCc_btn_bcc + 0.000168 BCc_coa_bcc + 0.129799 BCc_ctp_bcc + 0.088988 BCc_cys_L_bcc + 0.024805 BCc_datp_bcc + 0.025612 BCc_dctp_bcc + 0.025612 BCc_dgtp_bcc + 0.024805 BCc_dttp_bcc + 0.000223 BCc_f…	Growth		0	1000	UNIVERSAL
BCc_C160SN	R_Fatty_acid_biosynthesis__n_C160_	BCc_actACP_bcc + 19.0 BCc_h_bcc + 6.0 BCc_malACP_bcc + 14.0 BCc_nadph_bcc --> 7.0 BCc_ACP_bcc + 6.0 BCc_co2_bcc + 6.0 BCc_h2o_bcc + 14.0 BCc_nadp_bcc + BCc_palm_bcc	Membrane Lipid Metabolism		0	1000	( ( BCc_056 and BCc_217 and BCc_167 and BCc_147 ) )
BCc_C180SN	R_Fatty_acid_biosynthesis__n_C180_	BCc_actACP_bcc + 22.0 BCc_h_bcc + 7.0 BCc_malACP_bcc + 16.0 BCc_nadph_bcc --> 8.0 BCc_ACP_bcc + 7.0 BCc_co2_bcc + 7.0 BCc_h2o_bcc + 16.0 BCc_nadp_bcc + BCc_ocdca_bcc	Membrane Lipid Metabolism		0	1000	( ( BCc_056 and BCc_217 and BCc_167 and BCc_147 ) )
BCc_C80SN	R_Fatty_acid_biosynthesis__n_C80_	BCc_actACP_bcc + 23.0 BCc_h_bcc + 7.0 BCc_malACP_bcc + 16.0 BCc_nadph_bcc --> 8.0 BCc_ACP_bcc + 7.0 BCc_co2_bcc + 8.0 BCc_h2o_bcc + 16.0 BCc_nadp_bcc + BCc_octa_bcc	Membrane Lipid Metabolism		0	1000	( ( BCc_056 and BCc_217 and BCc_167 and BCc_147 ) )
BCc_CBPS	R_carbamoyl_phosphate_synthase__glutamine_hydrolysing_	2.0 BCc_atp_bcc + BCc_gln_L_bcc + BCc_h2o_bcc + BCc_hco3_bcc --> 2.0 BCc_adp_bcc + BCc_cbp_bcc + BCc_glu_L_bcc + 2.0 BCc_h_bcc + BCc_pi_bcc	Arginine and Proline Metabolism	6.3.5.5	0	1000	( ( BCc_091 and BCc_090 ) )
BCc_CHORM	R_chorismate_mutase	BCc_chor_bcc --> BCc_pphn_bcc	Tyrosine Tryptophan and Phenylalanine Metabolism	5.4.99.5	0	1000	( BCc_244 )
BCc_CHORS	R_chorismate_synthase	BCc_3psme_bcc --> BCc_chor_bcc + BCc_pi_bcc	Tyrosine Tryptophan and Phenylalanine Metabolism	4.2.3.5	0	1000	( BCc_061 )
BCc_CO2t	R_CO2_diffusion	BCc_co2_bcc --> co2_e	Transport, Extracellular		0	1000	SPONTANEOUS
BCc_COAt	R_Coenzyme_A_putative_transporter	BCc_coa_bcc --> coa_e	Transport, Extracellular		0	1000	BCc_ORPHAN
BCc_CTPt	R_CTP_putative_transporter	ctp_e --> BCc_ctp_bcc	Transport, Extracellular		0	1000	BCc_ORPHAN
BCc_CYSt	R_L_Cysteine_putative_transporter	cys_L_e --> BCc_cys_L_bcc	Transport, Extracellular		0	1000	BCc_ORPHAN
BCc_CYTBO3	R_cytochrome_oxidase_bo3__ubiquinol_8_25_protons_	2.0 BCc_h_bcc + 0.5 BCc_o2_bcc + BCc_q8h2_bcc --> BCc_h2o_bcc + BCc_q8_bcc + 2.0 h_e	Oxidative Phosphorylation		0	1000	( ( BCc_288 and BCc_289 and BCc_290 and BCc_291 ) )
BCc_DAD5t	R_5_Deoxyadenosine_putative_transporter	BCc_dad_5_bcc --> dad_5_e	Transport, Extracellular		0	1000	BCc_ORPHAN
BCc_DAPDC	R_diaminopimelate_decarboxylase	BCc_26dap_M_bcc + BCc_h_bcc --> BCc_co2_bcc + BCc_lys_L_bcc	Threonine and Lysine Metabolism	4.1.1.20	0	1000	( BCc_271 )
BCc_DAPE	R_diaminopimelate_epimerase	BCc_26dap_LL_bcc --> BCc_26dap_M_bcc	Threonine and Lysine Metabolism	5.1.1.7	0	1000	( BCc_380 )
BCc_dATPt	R_dATP_putative_transporter	datp_e --> BCc_datp_bcc	Transport, Extracellular		0	1000	BCc_ORPHAN
BCc_dCTPt	R_dCTP_putative_transporter	dctp_e --> BCc_dctp_bcc	Transport, Extracellular		0	1000	BCc_ORPHAN
BCc_DDPA	R_3_deoxy_D_arabino_heptulosonate_7_phosphate_synthetase	BCc_e4p_bcc + BCc_h2o_bcc + BCc_pep_bcc --> BCc_2dda7p_bcc + BCc_pi_bcc	Tyrosine Tryptophan and Phenylalanine Metabolism	4.1.2.15	0	1000	( BCc_077 )
BCc_dGTPt	R_dGTP_putative_transporter	dgtp_e --> BCc_dgtp_bcc	Transport, Extracellular		0	1000	BCc_ORPHAN
BCc_DHAD1	R_dihydroxy_acid_dehydratase__2_3_dihydroxy_3_methylbutanoate_	BCc_23dhmb_bcc --> BCc_3mob_bcc + BCc_h2o_bcc	Valine Leucine and Isoleucine Metabolism	4.2.1.9	0	1000	( BCc_389 )
BCc_DHAD2	R_Dihydroxy_acid_dehydratase__2_3_dihydroxy_3_methylpentanoate_	BCc_23dhmp_bcc --> BCc_3mop_bcc + BCc_h2o_bcc	Valine Leucine and Isoleucine Metabolism	4.2.1.9	0	1000	( BCc_389 )
BCc_DHDPRy	R_dihydrodipicolinate_reductase__NADPH_	BCc_23dhdp_bcc + BCc_h_bcc + BCc_nadph_bcc --> BCc_nadp_bcc + BCc_thdp_bcc	Threonine and Lysine Metabolism	1.3.1.26	0	1000	( BCc_092 )
BCc_DHDPS	R_dihydrodipicolinate_synthase	BCc_aspsa_bcc + BCc_pyr_bcc --> BCc_23dhdp_bcc + 2.0 BCc_h2o_bcc + BCc_h_bcc	Threonine and Lysine Metabolism	4.2.1.52	0	1000	( BCc_060 )
BCc_DHQD	R_3_dehydroquinate_dehydratase	BCc_3dhq_bcc --> BCc_3dhsk_bcc + BCc_h2o_bcc	Tyrosine Tryptophan and Phenylalanine Metabolism	4.2.1.10	0	1000	( BCc_251 )
BCc_DHQS	R_3_dehydroquinate_synthase	BCc_2dda7p_bcc --> BCc_3dhq_bcc + BCc_pi_bcc	Tyrosine Tryptophan and Phenylalanine Metabolism	4.2.3.4	0	1000	( BCc_352 )
BCc_DM_ahcys_c	Sink for S-Adenosyl-L-homocysteine	BCc_ahcys_bcc -->	Cofactor and Prosthetic Group Biosynthesis		0	1000	BCc_ORPHAN
BCc_dTTPt	R_dTTP_putative_transporter	dttp_e --> BCc_dttp_bcc	Transport, Extracellular		0	1000	BCc_ORPHAN
BCc_EGMEACPR	Enoylglutaryl-[ACP] methyl ester reductase	BCc_egmeACP_bcc + BCc_h_bcc + BCc_nadh_bcc --> BCc_gmeACP_bcc + BCc_nad_bcc	Cofactor and Prosthetic Group Biosynthesis	1.3.1.9	0	1000	BCc_167
BCc_ENO	R_enolase	BCc_2pg_bcc --> BCc_h2o_bcc + BCc_pep_bcc	GlycolysisGluconeogenesis	4.2.1.11	0	1000	( BCc_264 )
BCc_EPMEACPR	Enoylpimeloyl-[ACP] methyl ester reductase	BCc_epmeACP_bcc + BCc_h_bcc + BCc_nadh_bcc --> BCc_nad_bcc + BCc_pmeACP_bcc	Cofactor and Prosthetic Group Biosynthesis	1.3.1.9	0	1000	BCc_167
BCc_FADt	R_FAD_putative_transporter	fad_e --> BCc_fad_bcc	Transport, Extracellular		0	1000	BCc_ORPHAN
BCc_FBA	R_fructose_bisphosphate_aldolase	BCc_fdp_bcc --> BCc_dhap_bcc + BCc_g3p_bcc	GlycolysisGluconeogenesis	4.1.2.13	0	1000	( BCc_279 )
BCc_FRDPt	R_Farnesyl_diphosphate_putative_transporter	frdp_e --> BCc_frdp_bcc	Transport, Extracellular		0	1000	BCc_ORPHAN
BCc_FUMt	R_Fumarate_putative_transporter	BCc_fum_bcc --> fum_e	Transport, Extracellular		0	1000	BCc_ORPHAN
BCc_G6PDH2r	R_glucose_6_phosphate_dehydrogenase	BCc_g6p_bcc + BCc_nadp_bcc --> BCc_6pgl_bcc + BCc_h_bcc + BCc_nadph_bcc	Pentose Phosphate Pathway	1.1.1.49	0	1000	( BCc_199 )
BCc_G6Pt	R_M_D_Glucose_C6H11O9P_putative_transporter	g6p_e --> BCc_g6p_bcc	Transport, Extracellular		0	1000	BCc_ORPHAN
BCc_GAPD	R_glyceraldehyde_3_phosphate_dehydrogenase	BCc_g3p_bcc + BCc_nad_bcc + BCc_pi_bcc --> BCc_13dpg_bcc + BCc_h_bcc + BCc_nadh_bcc	GlycolysisGluconeogenesis	1.2.1.12	0	1000	( BCc_181 )
BCc_GHMT2	R_glycine_hydroxymethyltransferase	BCc_ser_L_bcc + BCc_thf_bcc --> BCc_gly_bcc + BCc_h2o_bcc + BCc_mlthf_bcc	Glycine and Serine Metabolism	2.1.2.1	0	1000	( BCc_178 )
BCc_GLNt	R_L_Glutamine_putative_transporter	gln_L_e --> BCc_gln_L_bcc	Transport, Extracellular		0	1000	BCc_ORPHAN
BCc_GLUt	R_L_Glutamate_putative_transporter	glu_L_e --> BCc_glu_L_bcc	Transport, Extracellular		0	1000	BCc_ORPHAN
BCc_GLYt	R_Glycine_putative_transporter	gly_e --> BCc_gly_bcc	Transport, Extracellular		0	1000	BCc_ORPHAN
BCc_GND	R_phosphogluconate_dehydrogenase	BCc_6pgc_bcc + BCc_nadp_bcc --> BCc_co2_bcc + BCc_nadph_bcc + BCc_ru5p_D_bcc	Pentose Phosphate Pathway	1.1.1.44	0	1000	( BCc_071 )
BCc_GTPt	R_GTP_putative_transporter	gtp_e --> BCc_gtp_bcc	Transport, Extracellular		0	1000	BCc_ORPHAN
BCc_H2Ot	R_H2O_diffussion	h2o_e <=> BCc_h2o_bcc	Transport, Extracellular		-1000	1000	(SPONTANEOUS)
BCc_H2St	R_H2S_diffusion	h2s_e --> BCc_h2s_bcc	Transport, Extracellular		0	1000	(SPONTANEOUS)
BCc_HCO3E	R_HCO3_equilibration_reaction	BCc_co2_bcc + BCc_h2o_bcc --> BCc_h_bcc + BCc_hco3_bcc	Unassigned	4.2.1.1	0	1000	(SPONTANEOUS)
BCc_HCYSt	R_L_Homocysteine_putative_transporter	hcys_L_e --> BCc_hcys_L_bcc	Transport, Extracellular		0	1000	BCc_ORPHAN
BCc_HEMEOS	R_Heme_O_synthase	BCc_frdp_bcc + BCc_h2o_bcc + BCc_pheme_bcc --> BCc_hemeO_bcc + BCc_ppi_bcc	Cofactor and Prosthetic Group Biosynthesis	2.5.1.-	0	1000	( BCc_287 )
BCc_HISt	R_L_Histidine_putative_transporter	BCc_his_L_bcc --> his_L_e	Transport, Extracellular		0	1000	BCc_ORPHAN
BCc_HISTD	R_histidinol_dehydrogenase	BCc_h2o_bcc + BCc_histd_bcc + 2.0 BCc_nad_bcc --> 3.0 BCc_h_bcc + BCc_his_L_bcc + 2.0 BCc_nadh_bcc	Histidine Metabolism	1.1.1.23	0	1000	( BCc_064 )
BCc_HISTP	R_histidinol_phosphatase	BCc_h2o_bcc + BCc_hisp_bcc --> BCc_histd_bcc + BCc_pi_bcc	Histidine Metabolism	3.1.3.15	0	1000	( BCc_066 )
BCc_HSDy	R_homoserine_dehydrogenase__NADPH_	BCc_aspsa_bcc + BCc_h_bcc + BCc_nadph_bcc --> BCc_hom_L_bcc + BCc_nadp_bcc	Threonine and Lysine Metabolism	1.1.1.3	0	1000	( BCc_127 )
BCc_HSK	R_homoserine_kinase	BCc_atp_bcc + BCc_hom_L_bcc --> BCc_adp_bcc + BCc_h_bcc + BCc_phom_bcc	Threonine and Lysine Metabolism	2.7.1.39	0	1000	( BCc_126 )
BCc_HSTPT	R_histidinol_phosphate_transaminase	BCc_glu_L_bcc + BCc_imacp_bcc --> BCc_akg_bcc + BCc_hisp_bcc	Histidine Metabolism	2.6.1.9	0	1000	( BCc_065 )
BCc_Ht	R_proton_motive_force_dissipation	h_e --> BCc_h_bcc	Transport, Extracellular		0	1000	BCc_ORPHAN
BCc_IG3PS	R_Imidazole_glycerol_3_phosphate_synthase	BCc_gln_L_bcc + BCc_prlp_bcc --> BCc_aicar_bcc + BCc_eig3p_bcc + BCc_glu_L_bcc + BCc_h_bcc	Histidine Metabolism	2.4.2.-	0	1000	( ( BCc_067 and BCc_069 ) )
BCc_IGPDH	R_imidazoleglycerol_phosphate_dehydratase	BCc_eig3p_bcc --> BCc_h2o_bcc + BCc_imacp_bcc	Histidine Metabolism	4.2.1.19	0	1000	( BCc_066 )
BCc_ILEt	R_L_Isoleucine_putative_transporter	BCc_ile_L_bcc --> ile_L_e	Transport, Extracellular		0	1000	BCc_ORPHAN
BCc_ILETA	R_isoleucine_transaminase	BCc_3mop_bcc + BCc_glu_L_bcc --> BCc_akg_bcc + BCc_ile_L_bcc	Valine Leucine and Isoleucine Metabolism	2.6.1.42	0	1000	BCc_ORPHAN
BCc_IPMD	R_3_isopropylmalate_dehydrogenase	BCc_3c2hmp_bcc + BCc_nad_bcc --> BCc_3c4mop_bcc + BCc_h_bcc + BCc_nadh_bcc	Valine Leucine and Isoleucine Metabolism	1.1.1.85	0	1000	( BCc_pL03 )
BCc_IPPMIa	R_3_isopropylmalate_dehydratase	BCc_2ippm_bcc + BCc_h2o_bcc --> BCc_3c2hmp_bcc	Valine Leucine and Isoleucine Metabolism	4.2.1.33	0	1000	( ( BCc_pL05 and BCc_pL04 ) )
BCc_IPPMIb	R_2_isopropylmalate_hydratase	BCc_3c3hmp_bcc --> BCc_2ippm_bcc + BCc_h2o_bcc	Valine Leucine and Isoleucine Metabolism	4.2.1.33	0	1000	( ( BCc_pL05 and BCc_pL04 ) )
BCc_IPPS	R_2_isopropylmalate_synthase	BCc_3mob_bcc + BCc_accoa_bcc + BCc_h2o_bcc --> BCc_3c3hmp_bcc + BCc_coa_bcc + BCc_h_bcc	Valine Leucine and Isoleucine Metabolism	2.3.3.13	0	1000	( BCc_pL01 )
BCc_KARA1i	R_acetohydroxy_acid_isomeroreductase	BCc_alac_S_bcc + BCc_h_bcc + BCc_nadph_bcc --> BCc_23dhmb_bcc + BCc_nadp_bcc	Valine Leucine and Isoleucine Metabolism	1.1.1.86	0	1000	( BCc_388 )
BCc_KARA2i	R_ketol_acid_reductoisomerase__2_Aceto_2_hydroxybutanoate_	BCc_2ahbut_bcc + BCc_h_bcc + BCc_nadph_bcc --> BCc_23dhmp_bcc + BCc_nadp_bcc	Valine Leucine and Isoleucine Metabolism	1.1.1.86	0	1000	( BCc_388 )
BCc_KAS14	R_beta_ketoacyl_ACP_synthase	BCc_acACP_bcc + BCc_h_bcc + BCc_malACP_bcc --> BCc_ACP_bcc + BCc_actACP_bcc + BCc_co2_bcc	Membrane Lipid Metabolism	2.3.1.41	0	1000	( BCc_056 )
BCc_LEUt	R_L_Leucine_putative_transporter	BCc_leu_L_bcc --> leu_L_e	Transport, Extracellular		0	1000	BCc_ORPHAN
BCc_LEUTAi	R_leucine_transaminase	BCc_4mop_bcc + BCc_glu_L_bcc --> BCc_akg_bcc + BCc_leu_L_bcc	Valine Leucine and Isoleucine Metabolism	2.6.1.42	0	1000	BCc_ORPHAN
BCc_LIPOPBt	R_lipoate_putative_transporter	BCc_lipopb_bcc --> lipopb_e	Transport, Extracellular		0	1000	BCc_ORPHAN
BCc_LIPOS	Lipoate synthase	2.0 BCc_amet_bcc + 2.0 BCc_h2s_bcc + BCc_nad_bcc + BCc_octapb_bcc --> 2.0 BCc_dad_5_bcc + 3.0 BCc_h_bcc + BCc_lipopb_bcc + 2.0 BCc_met_L_bcc + BCc_nadh_bcc	Cofactor and Prosthetic Group Biosynthesis	2.8.1.8	0	1000	BCc_170
BCc_LYSt	R_L_Lysine_putative_transporter	BCc_lys_L_bcc --> lys_L_e	Transport, Extracellular		0	1000	BCc_ORPHAN
BCc_MACPD	R_Malonyl_ACP_decarboxylase	BCc_h_bcc + BCc_malACP_bcc --> BCc_acACP_bcc + BCc_co2_bcc	Membrane Lipid Metabolism	2.3.1.-	0	1000	( BCc_056 )
BCc_MALCOAMT	Malonyl-CoA methyltransferase	BCc_amet_bcc + BCc_malcoa_bcc --> BCc_ahcys_bcc + BCc_malcoame_bcc	Cofactor and Prosthetic Group Biosynthesis	2.1.1.197	0	1000	BCc_ORPHAN
BCc_malcoat	R_MalonylCoA_putative_transporter	malcoa_e --> BCc_malcoa_bcc	Transport, Extracellular		0	1000	BCc_ORPHAN
BCc_MCOATA	R_Malonyl_CoA_ACP_transacylase	BCc_ACP_bcc + BCc_malcoa_bcc --> BCc_coa_bcc + BCc_malACP_bcc	Membrane Lipid Metabolism	2.3.1.39	0	1000	( BCc_216 )
BCc_MEOHt	methanol transport difussion	BCc_meoh_bcc --> meoh_e	Transport, Extracellular		0	1000	SPONTANEOUS
BCc_METS	R_methionine_synthase	BCc_5mthf_bcc + BCc_hcys_L_bcc --> BCc_h_bcc + BCc_met_L_bcc + BCc_thf_bcc	Methionine Metabolism	2.1.1.13	0	1000	( BCc_017 )
BCc_METt	R_L_Methionine_putative_transporter	met_L_e --> BCc_met_L_bcc	Transport, Extracellular		0	1000	BCc_ORPHAN
BCc_MTHFC	R_methenyltetrahydrofolate_cyclohydrolase	BCc_h2o_bcc + BCc_methf_bcc --> BCc_10fthf_bcc + BCc_h_bcc	Folate Metabolism	3.5.4.9	0	1000	( BCc_305 )
BCc_MTHFD	R_methylenetetrahydrofolate_dehydrogenase__NADP_	BCc_mlthf_bcc + BCc_nadp_bcc --> BCc_methf_bcc + BCc_nadph_bcc	Folate Metabolism	1.5.1.5	0	1000	( BCc_305 )
BCc_MTHFR2	R_5_10_methylenetetrahydrofolate_reductase__NADH_	2.0 BCc_h_bcc + BCc_mlthf_bcc + BCc_nadh_bcc --> BCc_5mthf_bcc + BCc_nad_bcc	Folate Metabolism	1.5.1.20	0	1000	( BCc_030 )
BCc_NADH16	R_NADH_dehydrogenase__ubiquinone_8__35_protons_	4.0 BCc_h_bcc + BCc_nadh_bcc + BCc_q8_bcc --> BCc_nad_bcc + BCc_q8h2_bcc + 3.0 h_e	Oxidative Phosphorylation	1.6.5.11	0	1000	( ( BCc_109 and BCc_108 and BCc_107 and BCc_106 and BCc_105 and BCc_104 and BCc_103 and BCc_102 and BCc_101 and BCc_100 and BCc_099 and BCc_098 and BCc_097 ) )
BCc_NADH5	R_NADH_dehydrogenase__ubiquinone_8__35_protons_	BCc_h_bcc + BCc_nadh_bcc + BCc_q8_bcc --> BCc_nad_bcc + BCc_q8h2_bcc	Oxidative Phosphorylation	1.6.5.3	0	1000	( ( BCc_109 and BCc_108 and BCc_107 and BCc_106 and BCc_105 and BCc_104 and BCc_103 and BCc_102 and BCc_101 and BCc_100 and BCc_099 and BCc_098 and BCc_097 ) )
BCc_NADPt	R_Nicotinamide_adenine_dinucleotide_phosphate_putative_transporter	nadp_e --> BCc_nadp_bcc	Transport, Extracellular		0	1000	BCc_ORPHAN
BCc_NADt	R_Nicotinamide_adenine_dinucleotide_putative_transporter	nad_e --> BCc_nad_bcc	Transport, Extracellular		0	1000	BCc_ORPHAN
BCc_NH4t	R_Ammonia_diffusion	BCc_nh4_bcc --> nh4_e	Transport, Extracellular		0	1000	(SPONTANEOUS)
BCc_O2t	o2 transport (diffusion)	o2_e --> BCc_o2_bcc	Transport, Extracellular		0	1000	(SPONTANEOUS)
BCc_OCBT	R_ornithine_carbamoyltransferase	BCc_cbp_bcc + BCc_orn_bcc --> BCc_citr_L_bcc + BCc_h_bcc + BCc_pi_bcc	Arginine and Proline Metabolism	2.1.3.3	0	1000	( BCc_224 )
BCc_OCTNLL	Octanoate non-lipoylated apo domain ligase	BCc_atp_bcc + BCc_h_bcc + BCc_octa_bcc --> BCc_amp_bcc + BCc_octapb_bcc + BCc_ppi_bcc	Cofactor and Prosthetic Group Biosynthesis	2.3.1.181	0	1000	(BCc_169)
BCc_OGMEACPD	3-Oxo-glutaryl-[ACP] methyl ester dehydratase	BCc_hgmeACP_bcc --> BCc_egmeACP_bcc + BCc_h2o_bcc	Cofactor and Prosthetic Group Biosynthesis	4.2.1.59	0	1000	BCc_147
BCc_OGMEACPR	3-Oxo-glutaryl-[ACP] methyl ester reductase	BCc_h_bcc + BCc_nadph_bcc + BCc_ogmeACP_bcc --> BCc_hgmeACP_bcc + BCc_nadp_bcc	Cofactor and Prosthetic Group Biosynthesis	1.1.1.100	0	1000	BCc_217
BCc_OGMEACPS	3-Oxo-glutaryl-[ACP] methyl ester synthase	BCc_h_bcc + BCc_malACP_bcc + BCc_malcoame_bcc --> BCc_co2_bcc + BCc_coa_bcc + BCc_ogmeACP_bcc	Cofactor and Prosthetic Group Biosynthesis	2.3.1.41	0	1000	BCc_056
BCc_OMCDC	R_2_Oxo_4_methyl_3_carboxypentanoate_decarboxylation	BCc_3c4mop_bcc + BCc_h_bcc --> BCc_4mop_bcc + BCc_co2_bcc	Valine Leucine and Isoleucine Metabolism	1.1.1.85	0	1000	( BCc_pL03 )
BCc_OPMEACPD	3-Oxo-pimeloyl-[ACP] methyl ester dehydratase	BCc_hpmeACP_bcc --> BCc_epmeACP_bcc + BCc_h2o_bcc	Cofactor and Prosthetic Group Biosynthesis	4.2.1.59	0	1000	BCc_147
BCc_OPMEACPR	3-Oxo-pimeloyl-[ACP] methyl ester reductase	BCc_h_bcc + BCc_nadph_bcc + BCc_opmeACP_bcc --> BCc_hpmeACP_bcc + BCc_nadp_bcc	Cofactor and Prosthetic Group Biosynthesis	1.1.1.100	0	1000	BCc_217
BCc_OPMEACPS	3-Oxo-pimeloyl-[ACP] methyl ester synthase	BCc_gmeACP_bcc + BCc_h_bcc + BCc_malACP_bcc --> BCc_ACP_bcc + BCc_co2_bcc + BCc_opmeACP_bcc	Cofactor and Prosthetic Group Biosynthesis	2.3.1.41	0	1000	BCc_056
BCc_ORNITHINEt	R_Ornithine_putative_transporter	orn_e --> BCc_orn_bcc	Transport, Extracellular		0	1000	BCc_ORPHAN
BCc_PDH	R_pyruvate_dehydrogenase	BCc_coa_bcc + BCc_nad_bcc + BCc_pyr_bcc --> BCc_accoa_bcc + BCc_co2_bcc + BCc_nadh_bcc	GlycolysisGluconeogenesis	2.3.1.12	0	1000	( ( BCc_131 and BCc_132 and BCc_133 ) )
BCc_PFK	R_phosphofructokinase	BCc_atp_bcc + BCc_f6p_bcc --> BCc_adp_bcc + BCc_fdp_bcc + BCc_h_bcc	GlycolysisGluconeogenesis	2.7.1.11	0	1000	( BCc_187 )
BCc_PGI	R_glucose_6_phosphate_isomerase	BCc_g6p_bcc <=> BCc_f6p_bcc	GlycolysisGluconeogenesis	5.3.1.9	-1000	1000	( BCc_372 )
BCc_PGK	R_phosphoglycerate_kinase	BCc_13dpg_bcc + BCc_adp_bcc --> BCc_3pg_bcc + BCc_atp_bcc	GlycolysisGluconeogenesis	2.7.2.3	0	1000	( BCc_278 )
BCc_PGL	R_6_phosphogluconolactonase	BCc_6pgl_bcc + BCc_h2o_bcc --> BCc_6pgc_bcc + BCc_h_bcc	Pentose Phosphate Pathway	3.1.1.31	0	1000	( BCc_179 )
BCc_PGM	R_phosphoglycerate_mutase	BCc_3pg_bcc --> BCc_2pg_bcc	GlycolysisGluconeogenesis	5.4.2.1	0	1000	( BCc_186 )
BCc_PHEMEt	R_Protoheme_putative_transporter	pheme_e --> BCc_pheme_bcc	Transport, Extracellular		0	1000	BCc_ORPHAN
BCc_PHEt	R_L_Phenylalanine_putative_transporter	BCc_phe_L_bcc --> phe_L_e	Transport, Extracellular		0	1000	BCc_ORPHAN
BCc_PHETA	R_phenylalanine_transaminase	BCc_glu_L_bcc + BCc_phpyr_bcc --> BCc_akg_bcc + BCc_phe_L_bcc	Tyrosine Tryptophan and Phenylalanine Metabolism	2.6.1.58	0	1000	BCc_ORPHAN
BCc_PIt	R_Phosphate_putative_transporter	BCc_pi_bcc --> pi_e	Transport, Extracellular		0	1000	BCc_ORPHAN
BCc_PMEACPE	Pimeloyl-[ACP] methyl ester esterase	BCc_h2o_bcc + BCc_pmeACP_bcc --> BCc_meoh_bcc + BCc_pimACP_bcc	Cofactor and Prosthetic Group Biosynthesis	3.1.1.85	0	1000	BCc_356
BCc_PPA	R_inorganic_diphosphatase	BCc_h2o_bcc + BCc_ppi_bcc --> BCc_h_bcc + 2.0 BCc_pi_bcc	Anaplerotic reactions	3.6.1.1	0	1000	( BCc_053 )
BCc_PPNDH	R_prephenate_dehydratase	BCc_h_bcc + BCc_pphn_bcc --> BCc_co2_bcc + BCc_h2o_bcc + BCc_phpyr_bcc	Tyrosine Tryptophan and Phenylalanine Metabolism	4.2.1.51	0	1000	( BCc_244 )
BCc_PRAMPC	R_phosphoribosyl_AMP_cyclohydrolase	BCc_h2o_bcc + BCc_prbamp_bcc --> BCc_prfp_bcc	Histidine Metabolism	3.5.4.19	0	1000	( BCc_070 )
BCc_PRATPP	R_phosphoribosyl_ATP_pyrophosphatase	BCc_h2o_bcc + BCc_prbatp_bcc --> BCc_h_bcc + BCc_ppi_bcc + BCc_prbamp_bcc	Histidine Metabolism	3.6.1.31	0	1000	( BCc_070 )
BCc_PRMICIi	R_1__5_phosphoribosyl__5__5_phosphoribosylamino_methylideneamino_imidazole_4_carboxamide_isomerase__reversible_	BCc_prfp_bcc --> BCc_prlp_bcc	Histidine Metabolism	5.3.1.16	0	1000	( BCc_068 )
BCc_PROt	R_L_proline_putative_transporter	pro_L_e --> BCc_pro_L_bcc	Transport, Extracellular		0	1000	BCc_ORPHAN
BCc_PRPPS	R_phosphoribosylpyrophosphate_synthetase	BCc_atp_bcc + BCc_r5p_bcc --> BCc_amp_bcc + BCc_h_bcc + BCc_prpp_bcc	Histidine Metabolism	2.7.6.1	0	1000	( BCc_110 )
BCc_PSCVT	R_3_phosphoshikimate_1_carboxyvinyltransferase	BCc_pep_bcc + BCc_skm5p_bcc --> BCc_3psme_bcc + BCc_pi_bcc	Tyrosine Tryptophan and Phenylalanine Metabolism	2.5.1.19	0	1000	( BCc_191 )
BCc_PTAr	R_phosphotransacetylase	BCc_accoa_bcc + BCc_pi_bcc <=> BCc_actp_bcc + BCc_coa_bcc	Pyruvate Metabolism	2.3.1.8	-1000	1000	( BCc_115 )
BCc_PYDX5Pt	R_Pyridoxal 5-phosphate_putative_transporter	pydx5p_e --> BCc_pydx5p_bcc	Transport, Extracellular		0	1000	BCc_ORPHAN
BCc_PYK	R_pyruvate_kinase	BCc_adp_bcc + BCc_h_bcc + BCc_pep_bcc --> BCc_atp_bcc + BCc_pyr_bcc	GlycolysisGluconeogenesis	2.7.1.40	0	1000	( BCc_198 )
BCc_Q8t	R_Ubiquinone_8_putative_transporter	q8_e --> BCc_q8_bcc	Transport, Extracellular		0	1000	BCc_ORPHAN
BCc_RIBFLVt	R_Riboflavin_putative_transporter	ribflv_e --> BCc_ribflv_bcc	Transport, Extracellular		0	1000	BCc_ORPHAN
BCc_RPE	R_ribulose_5_phosphate_3_epimerase	BCc_ru5p_D_bcc <=> BCc_xu5p_D_bcc	Pentose Phosphate Pathway	5.1.3.1	-1000	1000	( BCc_351 )
BCc_RPI	R_ribose_5_phosphate_isomerase	BCc_ru5p_D_bcc --> BCc_r5p_bcc	Pentose Phosphate Pathway	5.3.1.6	0	1000	( BCc_259 )
BCc_SDPDS	R_succinyl_diaminopimelate_desuccinylase	BCc_h2o_bcc + BCc_sl26da_bcc --> BCc_26dap_LL_bcc + BCc_succ_bcc	Threonine and Lysine Metabolism	3.5.1.18	0	1000	( BCc_059 )
BCc_SDPTA	R_succinyldiaminopimelate_transaminase	BCc_glu_L_bcc + BCc_sl2a6o_bcc --> BCc_akg_bcc + BCc_sl26da_bcc	Threonine and Lysine Metabolism	2.6.1.17	0	1000	BCc_192
BCc_SERt	R_L_Serine_putative_transporter	ser_L_e --> BCc_ser_L_bcc	Transport, Extracellular		0	1000	BCc_ORPHAN
BCc_SHK3Dr	R_shikimate_dehydrogenase	BCc_3dhsk_bcc + BCc_h_bcc + BCc_nadph_bcc --> BCc_nadp_bcc + BCc_skm_bcc	Tyrosine Tryptophan and Phenylalanine Metabolism	1.1.1.25	0	1000	( BCc_312 )
BCc_SHKK	R_shikimate_kinase	BCc_atp_bcc + BCc_skm_bcc --> BCc_adp_bcc + BCc_h_bcc + BCc_skm5p_bcc	Tyrosine Tryptophan and Phenylalanine Metabolism	2.7.1.71	0	1000	( BCc_353 )
BCc_SKMt	R_shikimate_putative_transporter	BCc_skm_bcc --> skm_e	Transport, Extracellular		0	1000	BCc_ORPHAN
BCc_SUCCt	R_Succinate_putative_transporter	BCc_succ_bcc --> succ_e	Transport, Extracellular		0	1000	BCc_ORPHAN
BCc_TALA	R_transaldolase	BCc_g3p_bcc + BCc_s7p_bcc <=> BCc_e4p_bcc + BCc_f6p_bcc	Pentose Phosphate Pathway	2.2.1.2	-1000	1000	( BCc_057 )
BCc_THDPS	R_tetrahydrodipicolinate_succinylase	BCc_h2o_bcc + BCc_succoa_bcc + BCc_thdp_bcc --> BCc_coa_bcc + BCc_sl2a6o_bcc	Threonine and Lysine Metabolism	2.3.1.117	0	1000	( BCc_140 )
BCc_THFt	R_Tetrahydrofolate_putative_transporter	thf_e --> BCc_thf_bcc	Transport, Extracellular		0	1000	BCc_ORPHAN
BCc_THMPPt	R_Thiamine diphosphate_putative_transporter	thmpp_e --> BCc_thmpp_bcc	Transport, Extracellular		0	1000	BCc_ORPHAN
BCc_THRD_L	R_L_threonine_deaminase	BCc_thr_L_bcc --> BCc_2obut_bcc + BCc_nh4_bcc	Valine Leucine and Isoleucine Metabolism	4.3.1.19	0	1000	BCc_ORPHAN
BCc_THRS	R_threonine_synthase	BCc_h2o_bcc + BCc_phom_bcc --> BCc_pi_bcc + BCc_thr_L_bcc	Threonine and Lysine Metabolism	4.2.3.1	0	1000	( BCc_125 )
BCc_THRt	R_L_Threonine_putative_transporter	BCc_thr_L_bcc --> thr_L_e	Transport, Extracellular		0	1000	BCc_ORPHAN
BCc_TKT1	R_transketolase	BCc_r5p_bcc + BCc_xu5p_D_bcc <=> BCc_g3p_bcc + BCc_s7p_bcc	Pentose Phosphate Pathway	2.2.1.1	-1000	1000	( BCc_058 )
BCc_TKT2	R_transketolase	BCc_e4p_bcc + BCc_xu5p_D_bcc <=> BCc_f6p_bcc + BCc_g3p_bcc	Pentose Phosphate Pathway	2.2.1.1	-1000	1000	( BCc_058 )
BCc_TPI	R_triose_phosphate_isomerase	BCc_dhap_bcc --> BCc_g3p_bcc	GlycolysisGluconeogenesis	5.3.1.1	0	1000	( BCc_188 )
BCc_TRPt	R_L_Tryptophan_putative_transporter	trp_L_e --> BCc_trp_L_bcc	Transport, Extracellular		0	1000	BCc_ORPHAN
BCc_TYRLt	R_tyrosine_L_putative_transporter	tyr_L_e --> BCc_tyr_L_bcc	Transport, Extracellular		0	1000	BCc_ORPHAN
BCc_UTPt	R_UTP_putative_transporter	utp_e --> BCc_utp_bcc	Transport, Extracellular		0	1000	BCc_ORPHAN
BCc_VALt	R_L_Valine_putative_transporter	BCc_val_L_bcc --> val_L_e	Transport, Extracellular		0	1000	BCc_ORPHAN
BCc_VALTA	R_valine_transaminase	BCc_3mob_bcc + BCc_glu_L_bcc --> BCc_akg_bcc + BCc_val_L_bcc	Valine Leucine and Isoleucine Metabolism	2.6.1.42	0	1000	BCc_ORPHAN
SCc_4AMPMt	4AMPM_putative_transport	SCc_4ampm_scc --> 4ampm_e			0	1000	SCc_ORPHAN
SCc_4PASPt	4-Phospho-L-aspartate_putative_transporter	4pasp_e --> SCc_4pasp_scc			0	1000	SCc_ORPHAN
SCc_8AONNt	8-Amino-7-oxononanoate reversible transport via proton symport	8aonn_e --> SCc_8aonn_scc			0	1000	SCc_ORPHAN
SCc_A5PISO	arabinose-5-phosphate isomerase	SCc_ru5p_D_scc --> SCc_ara5p_scc			0	1000	(SCc_610)
SCc_ACCOACr	acetyl-CoA carboxylase, reversible reaction	SCc_accoa_scc + SCc_atp_scc + SCc_hco3_scc --> SCc_adp_scc + SCc_h_scc + SCc_malcoa_scc + SCc_pi_scc	Transport, Extracellular		0	1000	(SCc_220 and SCc_738 and SCc_737 and SCc_493)
SCc_ACKr	acetate kinase	SCc_actp_scc + SCc_adp_scc --> SCc_ac_scc + SCc_atp_scc	Transport, Extracellular		0	1000	(SCc_499)
SCc_ACOATA	Acetyl-CoA ACP transacylase	SCc_ACP_scc + SCc_accoa_scc <=> SCc_acACP_scc + SCc_coa_scc	Transport, Extracellular		-1000	1000	(SCc_433)
SCc_ACt	acetate_putative_transport	SCc_ac_scc --> ac_e	Alternate Carbon Metabolism	5.3.1.13	0	1000	SCc_ORPHAN
SCc_ADCL	4-aminobenzoate synthase	SCc_4adcho_scc --> SCc_4abz_scc + SCc_h_scc + SCc_pyr_scc	Membrane Lipid Metabolism	6.4.1.2	0	1000	SCc_438
SCc_ADCS	4_amino_4_deoxychorismate_synthase	SCc_chor_scc + SCc_gln_L_scc --> SCc_4adcho_scc + SCc_glu_L_scc	Pyruvate Metabolism	2.7.2.1	0	1000	SCc_516
SCc_ADK1	adenylate kinase	SCc_amp_scc + SCc_atp_scc --> 2.0 SCc_adp_scc	Membrane Lipid Metabolism	2.3.1.38	0	1000	(SCc_364)
SCc_ADSK	adenylyl-sulfate kinase	SCc_aps_scc + SCc_atp_scc --> SCc_adp_scc + SCc_h_scc + SCc_paps_scc	Transport, Extracellular		0	1000	(SCc_160)
SCc_ADSL1r	adenylsuccinate lyase	SCc_dcamp_scc --> SCc_amp_scc + SCc_fum_scc	Cofactor and Prosthetic Group Biosynthesis	4.1.3.38	0	1000	(SCc_406)
SCc_ADSS	adenylosuccinate synthase	SCc_asp_L_scc + SCc_gtp_scc + SCc_imp_scc --> SCc_dcamp_scc + SCc_gdp_scc + 2.0 SCc_h_scc + SCc_pi_scc	Cofactor and Prosthetic Group Biosynthesis	2.6.1.85	0	1000	(SCc_087)
SCc_AGMHE	ADP-D-glycero-D-manno-heptose epimerase	SCc_adphep_DD_scc --> SCc_adphep_LD_scc	Nucleotide Salvage Pathway	2.7.4.3	0	1000	(SCc_043)
SCc_AHCYSt	Adenosyl-homocysteine_putative_transporter	SCc_ahcys_scc --> ahcys_e	Cysteine Metabolism	2.7.1.25	0	1000	SCc_ORPHAN
SCc_AKGt	2-oxoglutarate reversible transport via symport	SCc_akg_scc --> akg_e	Purine and Pyrimidine Biosynthesis	4.3.2.2	0	1000	SCc_ORPHAN
SCc_ALAALAr	D-alanine-D-alanine ligase (reversible)	2.0 SCc_ala_D_scc + SCc_atp_scc --> SCc_adp_scc + SCc_alaala_scc + SCc_h_scc + SCc_pi_scc	Purine and Pyrimidine Biosynthesis	6.3.4.4	0	1000	(SCc_139)
SCc_ALAt	L-alanine reversible transport via proton symport	ala_L_e + h_e --> SCc_ala_L_scc + SCc_h_scc	Cell Envelope Biosynthesis	5.1.3.20	0	1000	(SCc_361)
SCc_AMAOTr	adenosylmethionine-8-amino-7-oxononanoate transaminase	SCc_8aonn_scc + SCc_amet_scc --> SCc_amob_scc + SCc_dann_scc	Transport, Extracellular		0	1000	(SCc_554)
SCc_AMETt	S-Adenosyl-L-methionine_putative_transporter	amet_e --> SCc_amet_scc	Transport, Extracellular		0	1000	SCc_ORPHAN
SCc_AMOBt	S-Adenosyl-4-methylthio-2-oxobutanoate_putative_transporter	SCc_amob_scc --> amob_e	Cell Envelope Biosynthesis	6.3.2.4	0	1000	SCc_ORPHAN
SCc_AMPMS2	4_amino_2_methyl_5_phosphomethylpyrimidine_synthetase	SCc_air_scc + SCc_h2o_scc + SCc_nad_scc --> SCc_4ampm_scc + 2.0 SCc_for_scc + 3.0 SCc_h_scc + SCc_nadh_scc	Transport, Extracellular		0	999999	SCc_720
SCc_AMPt	AMP_putative_transporter	SCc_amp_scc --> amp_e	Cofactor and Prosthetic Group Biosynthesis	2.6.1.62	0	1000	SCc_ORPHAN
SCc_ANPRT	anthranilate phosphoribosyltransferase	SCc_anth_scc + SCc_prpp_scc --> SCc_ppi_scc + SCc_pran_scc	Transport, Extracellular		0	1000	(SCc_377)
SCc_ANTHt	anthranilate_putative_transport	anth_e --> SCc_anth_scc	Transport, Extracellular		0	1000	SCc_ORPHAN
SCc_APRAUR	5-amino-6-(5-phosphoribosylamino)uracil reductase	SCc_5apru_scc + SCc_h_scc + SCc_nadph_scc --> SCc_5aprbu_scc + SCc_nadp_scc	Cofactor and Prosthetic Group Biosynthesis		0	1000	(SCc_468)
SCc_ARGt	L-arginine reversible transport via proton symport	arg_L_e + h_e --> SCc_arg_L_scc + SCc_h_scc	Transport, Extracellular		0	1000	(SCc_625)
SCc_ASAD	aspartate-semialdehyde dehydrogenase	SCc_4pasp_scc + SCc_h_scc + SCc_nadph_scc --> SCc_aspsa_scc + SCc_nadp_scc + SCc_pi_scc	Tyrosine, Tryptophan, and Phenylalanine Metabolism	2.4.2.18	0	1000	(SCc_627)
SCc_ASNN	L-asparaginase	SCc_asn_L_scc + SCc_h2o_scc --> SCc_asp_L_scc + SCc_nh4_scc	Transport, Extracellular		0	1000	(SCc_449)
SCc_ASNt	L-asparagine reversible transport via proton symport	asn_L_e + h_e --> SCc_asn_L_scc + SCc_h_scc	Cofactor and Prosthetic Group Biosynthesis	1.1.1.193	0	1000	(SCc_548)
SCc_ASPCT	aspartate carbamoyltransferase	SCc_asp_L_scc + SCc_cbp_scc --> SCc_cbasp_scc + SCc_h_scc + SCc_pi_scc	Transport, Extracellular		0	1000	(SCc_770)
SCc_ASPt2	L-aspartate transport in via proton symport	asp_L_e + 2.0 h_e --> SCc_asp_L_scc + 2.0 SCc_h_scc	Threonine and Lysine Metabolism	1.2.1.11	0	1000	(SCc_075)
SCc_ATPM	ATP maintenance requirement	SCc_atp_scc + SCc_h2o_scc --> SCc_adp_scc + SCc_h_scc + SCc_pi_scc	Alanine and Aspartate Metabolism	3.5.1.1	0	100	SPONTANEOUS
SCc_ATPS4r	ATP synthase (four protons for one ATP)	SCc_adp_scc + SCc_pi_scc + 4.0 h_e --> SCc_atp_scc + SCc_h2o_scc + 3.0 SCc_h_scc	Transport, Extracellular		0	1000	((SCc_002 and SCc_003 and SCc_001) and (SCc_004 and SCc_005 and SCc_006 and SCc_007 and SCc_008))
SCc_BPNT	3,5-bisphosphate nucleotidase	SCc_h2o_scc + SCc_pap_scc --> SCc_amp_scc + SCc_pi_scc	Transport, Extracellular		0	1000	SCc_094
SCc_BTNt	Biotin_putative_transporter	btn_e --> SCc_btn_scc	Transport, Extracellular		0	1000	SCc_ORPHAN
SCc_BTS5	Biotin synthase	SCc_amet_scc + SCc_dtbt_scc + SCc_h2s_scc --> SCc_btn_scc + SCc_dad_5_scc + 3.0 SCc_h_scc + SCc_met_L_scc	Oxidative Phosphorylation	3.6.3.14	0	1000	(SCc_553)
SCc_Biomass_whith_wall_SCc	Biomass_whith_wall_SCc	0.000223 SCc_10fthf_scc + 0.499149 SCc_ala_L_scc + 0.000223 SCc_amet_scc + 0.28742 SCc_arg_L_scc + 0.234232 SCc_asn_L_scc + 0.234232 SCc_asp_L_scc + 54.119975 SCc_atp_scc + 2e-06 SCc_btn_scc + 0.000129 SCc_clpn_scc + 0.000168 SCc_coa_scc + 0.129799 SCc_ctp_scc + 0.088988 SCc_cys_L_scc + 0.024805 SCc_datp_scc + 0.025612 SCc_dctp_scc + 0.025612 SCc_dgtp_scc + 0.024805 SCc_dttp_scc + 0.000223 SCc_fa…	Growth		0	1000	UNIVERSAL
SCc_C120SN	Fatty acid biosynthesis (n-C12:0)	SCc_actACP_scc + 14.0 SCc_h_scc + 4.0 SCc_malACP_scc + 10.0 SCc_nadph_scc --> 4.0 SCc_ACP_scc + 4.0 SCc_co2_scc + SCc_ddcaACP_scc + 5.0 SCc_h2o_scc + 10.0 SCc_nadp_scc			0	1000	((SCc_216) and (SCc_437) and (SCc_435)) or ((SCc_616) and (SCc_216) and (SCc_435)) or ((SCc_616) and (SCc_503) and (SCc_435)) or ((SCc_503) and (SCc_437) and (SCc_435))
SCc_C140SN	Fatty acid biosynthesis (n-C14:0)	SCc_actACP_scc + 17.0 SCc_h_scc + 5.0 SCc_malACP_scc + 12.0 SCc_nadph_scc --> 5.0 SCc_ACP_scc + 5.0 SCc_co2_scc + 6.0 SCc_h2o_scc + SCc_myrsACP_scc + 12.0 SCc_nadp_scc	Cysteine Metabolism	3.1.3.7	0	1000	((SCc_216) and (SCc_616) and (SCc_435)) or ((SCc_616) and (SCc_503) and (SCc_435)) or ((SCc_503) and (SCc_437) and (SCc_435)) or ((SCc_216) and (SCc_437) and (SCc_435))
SCc_C141SN	Fatty acid biosynthesis (n-C14:1)	SCc_actACP_scc + 16.0 SCc_h_scc + 5.0 SCc_malACP_scc + 11.0 SCc_nadph_scc --> 5.0 SCc_ACP_scc + 5.0 SCc_co2_scc + 6.0 SCc_h2o_scc + 11.0 SCc_nadp_scc + SCc_tdeACP_scc	Transport, Extracellular		0	1000	((SCc_616) and (SCc_216) and (SCc_503) and (SCc_435))
SCc_C160SN	Fatty acid biosynthesis (n-C16:0)	SCc_actACP_scc + 20.0 SCc_h_scc + 6.0 SCc_malACP_scc + 14.0 SCc_nadph_scc --> 6.0 SCc_ACP_scc + 6.0 SCc_co2_scc + 7.0 SCc_h2o_scc + 14.0 SCc_nadp_scc + SCc_palmACP_scc	Cofactor and Prosthetic Group Biosynthesis	2.8.1.6	0	1000	((SCc_216) and (SCc_437) and (SCc_435)) or ((SCc_616) and (SCc_216) and (SCc_435)) or ((SCc_616) and (SCc_503) and (SCc_435)) or ((SCc_503) and (SCc_437) and (SCc_435))
SCc_C161SN	Fatty acid biosynthesis (n-C16:1)	SCc_actACP_scc + 19.0 SCc_h_scc + 6.0 SCc_malACP_scc + 13.0 SCc_nadph_scc --> 6.0 SCc_ACP_scc + 6.0 SCc_co2_scc + 7.0 SCc_h2o_scc + SCc_hdeACP_scc + 13.0 SCc_nadp_scc	Membrane Lipid Metabolism		0	1000	((SCc_616) and (SCc_216) and (SCc_503) and (SCc_435))
SCc_C181SN	Fatty acid biosynthesis (n-C18:1)	SCc_actACP_scc + 22.0 SCc_h_scc + 7.0 SCc_malACP_scc + 15.0 SCc_nadph_scc --> 7.0 SCc_ACP_scc + 7.0 SCc_co2_scc + 8.0 SCc_h2o_scc + 15.0 SCc_nadp_scc + SCc_octeACP_scc	Membrane Lipid Metabolism		0	1000	((SCc_616) and (SCc_216) and (SCc_503) and (SCc_437) and (SCc_435))
SCc_CBPS	carbamoyl-phosphate synthase (glutamine-hydrolysing)	2.0 SCc_atp_scc + SCc_gln_L_scc + SCc_h2o_scc + SCc_hco3_scc --> 2.0 SCc_adp_scc + SCc_cbp_scc + SCc_glu_L_scc + 2.0 SCc_h_scc + SCc_pi_scc	Membrane Lipid Metabolism		0	1000	(SCc_116 and SCc_117)
SCc_CDPMEK	4-(cytidine 5-diphospho)-2-C-methyl-D-erythritol kinase	SCc_4c2me_scc + SCc_atp_scc --> SCc_2p4c2me_scc + SCc_adp_scc + SCc_h_scc	Membrane Lipid Metabolism		0	1000	(SCc_418)
SCc_CHORS	chorismate_synthase	SCc_3psme_scc --> SCc_chor_scc + SCc_pi_scc	Membrane Lipid Metabolism		0	1000	( SCc_617 )
SCc_CLPNS_SCc	Cardiolipin Synthase (SCc)	0.04 SCc_pg_scc --> 0.02 SCc_clpn_scc + SCc_glyc_scc	Membrane Lipid Metabolism		0	1000	(SCc_338)
SCc_CO2t	CO2 transporter via diffusion	SCc_co2_scc --> co2_e	Arginine and Proline Metabolism	6.3.5.5	0	1000	(SPONTANEOUS)
SCc_CPPPGO	coproporphyrinogen oxidase (O2 required)	SCc_cpppg3_scc + 2.0 SCc_h_scc + SCc_o2_scc --> 2.0 SCc_co2_scc + 2.0 SCc_h2o_scc + SCc_pppg9_scc	Cofactor and Prosthetic Group Biosynthesis		0	1000	(SCc_333)
SCc_CTPS2	CTP synthase (glutamine)	SCc_atp_scc + SCc_gln_L_scc + SCc_h2o_scc + SCc_utp_scc --> SCc_adp_scc + SCc_ctp_scc + SCc_glu_L_scc + 2.0 SCc_h_scc + SCc_pi_scc	Tyrosine Tryptophan and Phenylalanine Metabolism	4.2.3.5	0	1000	(SCc_149)
SCc_CTPt	CTP_putative_transporter	SCc_ctp_scc --> ctp_e	Membrane Lipid Metabolism	2.7.8.-	0	1000	SCc_ORPHAN
SCc_CYSS	cysteine synthase	SCc_acser_scc + SCc_h2s_scc --> SCc_ac_scc + SCc_cys_L_scc + SCc_h_scc	Transport, Extracellular		0	1000	(SCc_313)
SCc_CYSt	L-cysteine_putative_transporter	SCc_cys_L_scc --> cys_L_e	Cofactor and Prosthetic Group Biosynthesis	1.3.3.3	0	1000	SCc_ORPHAN
SCc_CYTBO3	cytochrome oxidase bo3	2.5 SCc_h_scc + 0.5 SCc_o2_scc + SCc_q8h2_scc --> SCc_h2o_scc + SCc_q8_scc + 2.5 h_e	Purine and Pyrimidine Biosynthesis	6.3.4.2	0	1000	(SCc_479 and SCc_478 and SCc_476 and SCc_477)
SCc_CYTK1	cytidylate kinase (CMP)	SCc_atp_scc + SCc_cmp_scc --> SCc_adp_scc + SCc_cdp_scc	Transport, Extracellular		0	1000	(SCc_514)
SCc_DAD5t	5_Deoxyadenosine_putative_transport	SCc_dad_5_scc --> dad_5_e	Cysteine Metabolism		0	1000	SCc_ORPHAN
SCc_DAGK_SCc	Diacylglycerol kinase	0.02 SCc_12dgr_scc + SCc_atp_scc --> SCc_adp_scc + SCc_h_scc + 0.02 SCc_pa_scc	Transport, Extracellular		0	1000	SCc_ORPHAN
SCc_DALAt	D-alanine transport via proton symport	ala_D_e + h_e --> SCc_ala_D_scc + SCc_h_scc	Oxidative Phosphorylation		0	1000	(SCc_361)
SCc_DAPE	diaminopimelate epimerase	SCc_26dap_LL_scc --> SCc_26dap_M_scc	Nucleotide Salvage Pathway	2.7.4.14	0	1000	(SCc_682)
SCc_DASYN_SCc	CDP-Diacylglycerol synthetase (SCc)	SCc_ctp_scc + SCc_h_scc + 0.02 SCc_pa_scc --> 0.02 SCc_cdpdag_scc + SCc_ppi_scc	Transport, Extracellular		0	1000	(SCc_211)
SCc_dATPt	dATP_putative_transporter	SCc_datp_scc --> datp_e	Cell Envelope Biosynthesis	2.7.1.107	0	1000	SCc_ORPHAN
SCc_DB4PS	3,4-Dihydroxy-2-butanone-4-phosphate synthase	SCc_ru5p_D_scc --> SCc_db4p_scc + SCc_for_scc + SCc_h_scc	Transport, Extracellular		0	1000	(SCc_596)
SCc_DBTSr	dethiobiotin synthase	SCc_atp_scc + SCc_co2_scc + SCc_dann_scc --> SCc_adp_scc + SCc_dtbt_scc + 3.0 SCc_h_scc + SCc_pi_scc	Threonine and Lysine Metabolism	5.1.1.7	0	1000	(SCc_552)
SCc_DCTPD	dCTP_deaminase	SCc_dctp_scc + SCc_h2o_scc + SCc_h_scc --> SCc_dutp_scc + SCc_nh4_scc	Membrane Lipid Metabolism	2.7.7.41	0	999999	(SCc_536)
SCc_dCTPt	dCTP_putative_transporter	SCc_dctp_scc --> dctp_e	Transport, Extracellular		0	1000	SCc_ORPHAN
SCc_dGTPt	dGTP_putative_transporter	SCc_dgtp_scc --> dgtp_e	Cofactor and Prosthetic Group Biosynthesis	4.1.99.12	0	1000	SCc_ORPHAN
SCc_DHDPRy	dihydrodipicolinate reductase (NADPH)	SCc_23dhdp_scc + SCc_h_scc + SCc_nadph_scc --> SCc_nadp_scc + SCc_thdp_scc	Cofactor and Prosthetic Group Biosynthesis	6.3.3.3	0	1000	(SCc_115)
SCc_DHDPS	dihydrodipicolinate synthase	SCc_aspsa_scc + SCc_pyr_scc --> SCc_23dhdp_scc + 2.0 SCc_h2o_scc + SCc_h_scc	Nucleotide Salvage Pathway	3.5.4.13	0	1000	(SCc_305)
SCc_DHFR	dihydrofolate reductase	SCc_dhf_scc + SCc_h_scc + SCc_nadph_scc --> SCc_nadp_scc + SCc_thf_scc	Transport, Extracellular		0	1000	(SCc_118)
SCc_DHFS	dihydrofolate synthase	SCc_atp_scc + SCc_dhpt_scc + SCc_glu_L_scc --> SCc_adp_scc + SCc_dhf_scc + SCc_h_scc + SCc_pi_scc	Transport, Extracellular		0	1000	(SCc_494)
SCc_DHNPA2	dihydroneopterin aldolase	SCc_dhnpt_scc --> SCc_6hmhpt_scc + SCc_gcald_scc	Threonine and Lysine Metabolism	1.17.1.8	0	1000	SCc_ORPHAN
SCc_DHORD2	dihydoorotic acid dehydrogenase (quinone8)	SCc_dhor_S_scc + SCc_q8_scc --> SCc_orot_scc + SCc_q8h2_scc	Threonine and Lysine Metabolism	4.2.1.52	0	1000	(SCc_504)
SCc_DHORTS	dihydroorotase	SCc_cbasp_scc + SCc_h_scc --> SCc_dhor_S_scc + SCc_h2o_scc	Cofactor and Prosthetic Group Biosynthesis	1.5.1.3	0	1000	(SCc_428)
SCc_DHPPDA2	diaminohydroxyphosphoribosylaminopryrimidine deaminase (25drapp)	SCc_25drapp_scc + SCc_h2o_scc + SCc_h_scc --> SCc_5apru_scc + SCc_nh4_scc	Cofactor and Prosthetic Group Biosynthesis	6.3.2.12	0	1000	(SCc_468)
SCc_DHPS2	dihydropteroate synthase	SCc_4abz_scc + SCc_6hmhptpp_scc --> SCc_dhpt_scc + SCc_ppi_scc	Cofactor and Prosthetic Group Biosynthesis	4.1.2.25	0	1000	(SCc_061)
SCc_DMATT	dimethylallyltranstransferase	SCc_dmpp_scc + SCc_ipdp_scc --> SCc_grdp_scc + SCc_ppi_scc	Purine and Pyrimidine Biosynthesis	1.3.3.2	0	1000	(SCc_474)
SCc_DMPPS	1-hydroxy-2-methyl-2-(E)-butenyl 4-diphosphate reductase (dmpp)	SCc_h2mb4p_scc + SCc_h_scc + SCc_nadh_scc --> SCc_dmpp_scc + SCc_h2o_scc + SCc_nad_scc	Purine and Pyrimidine Biosynthesis	3.5.2.3	0	1000	(SCc_114)
SCc_DNMPPA	Dihydroneopterin monophosphate dephosphorylase	SCc_dhpmp_scc + SCc_h2o_scc --> SCc_dhnpt_scc + SCc_pi_scc	Cofactor and Prosthetic Group Biosynthesis	3.5.4.26	0	1000	SCc_ORPHAN
SCc_DNTPPA	Dihydroneopterin triphosphate pyrophosphatase	SCc_ahdt_scc + SCc_h2o_scc --> SCc_dhpmp_scc + SCc_h_scc + SCc_ppi_scc	Cofactor and Prosthetic Group Biosynthesis		0	1000	SCc_ORPHAN
SCc_DPCOAK	dephospho-CoA kinase	SCc_atp_scc + SCc_dpcoa_scc --> SCc_adp_scc + SCc_coa_scc + SCc_h_scc	Cofactor and Prosthetic Group Biosynthesis	2.5.1.1	0	1000	(SCc_146)
SCc_DTMPK	dTMP kinase	SCc_atp_scc + SCc_dtmp_scc --> SCc_adp_scc + SCc_dtdp_scc	Cofactor and Prosthetic Group Biosynthesis		0	1000	(SCc_439)
SCc_dTTPt	dTTP_putative_transporter	SCc_dttp_scc --> dttp_e	Cofactor and Prosthetic Group Biosynthesis	3.6.1.	0	1000	SCc_ORPHAN
SCc_DUTPDP	dUTP_diphosphatase	SCc_dutp_scc + SCc_h2o_scc --> SCc_dump_scc + SCc_h_scc + SCc_ppi_scc	Cofactor and Prosthetic Group Biosynthesis	3.6.1.37	0	999999	(SCc_028)
SCc_DXPRIi	1-deoxy-D-xylulose reductoisomerase	SCc_dxyl5p_scc + SCc_h_scc + SCc_nadph_scc --> SCc_2me4p_scc + SCc_nadp_scc	Cofactor and Prosthetic Group Biosynthesis	2.7.1.24	0	1000	(SCc_209)
SCc_DXPS	1-deoxy-D-xylulose 5-phosphate synthase	SCc_g3p_scc + SCc_h_scc + SCc_pyr_scc --> SCc_co2_scc + SCc_dxyl5p_scc	Nucleotide Salvage Pathway	2.7.4.9	0	1000	(SCc_473)
SCc_E4PD	Erythrose 4-phosphate dehydrogenase	SCc_e4p_scc + SCc_h2o_scc + SCc_nad_scc --> SCc_4per_scc + 2.0 SCc_h_scc + SCc_nadh_scc	Transport, Extracellular		0	1000	(SCc_448)
SCc_EDTXS1	Endotoxin Synthesis (lauroyl transferase)	SCc_ddcaACP_scc + SCc_kdo2lipid4_scc --> SCc_ACP_scc + SCc_kdo2lipid4L_scc	Nucleotide Salvage Pathway	3.6.1.23	0	1000	(SCc_322)
SCc_EDTXS2	Endotoxin Synthesis (myristoyl transferase)	SCc_kdo2lipid4L_scc + SCc_myrsACP_scc --> SCc_ACP_scc + SCc_lipa_scc	Cofactor and Prosthetic Group Biosynthesis		0	1000	(SCc_322)
SCc_ENO	enolase	SCc_2pg_scc --> SCc_h2o_scc + SCc_pep_scc	Cofactor and Prosthetic Group Biosynthesis		0	1000	(SCc_150)
SCc_FADt	fad_putative_transporter	SCc_fad_scc --> fad_e	Cofactor and Prosthetic Group Biosynthesis		0	1000	SCc_ORPHAN
SCc_FBA	fructose-bisphosphate aldolase	SCc_fdp_scc --> SCc_dhap_scc + SCc_g3p_scc	Cell Envelope Biosynthesis	2.3.1.241	0	1000	(SCc_186)
SCc_FCLT	Ferrochelatase	SCc_fe2_scc + SCc_ppp9_scc --> 2.0 SCc_h_scc + SCc_pheme_scc	Cell Envelope Biosynthesis	2.3.1.243	0	1000	(SCc_363)
SCc_FE2abc	iron (II) transport via ABC system	SCc_atp_scc + SCc_h2o_scc + fe2_e --> SCc_adp_scc + SCc_fe2_scc + SCc_h_scc + SCc_pi_scc	Glycolysis/Gluconeogenesis	4.2.1.11	0	1000	(SCc_629 and SCc_630)
SCc_FMNAT	FMN adenylyltransferase	SCc_atp_scc + SCc_fmn_scc + SCc_h_scc --> SCc_fad_scc + SCc_ppi_scc	Transport, Extracellular		0	1000	(SCc_111)
SCc_FMNt	FMN_putative_transporter	SCc_fmn_scc --> fmn_e	Glycolysis/Gluconeogenesis	4.1.2.13	0	1000	SCc_ORPHAN
SCc_FORt	formate transport via diffusion	SCc_for_scc --> for_e	Cofactor and Prosthetic Group Biosynthesis	4.99.1.1	0	1000	(SPONTANEOUS)
SCc_FRUK	fructose-1-phosphate kinase	SCc_atp_scc + SCc_f1p_scc --> SCc_adp_scc + SCc_fdp_scc + SCc_h_scc	Transport, Extracellular		0	1000	(SCc_621)
SCc_FRUpts	D-fructose transport via PEP:Pyr PTS	SCc_pep_scc + fru_e --> SCc_f1p_scc + SCc_pyr_scc	Cofactor and Prosthetic Group Biosynthesis	2.7.7.2	0	1000	((SCc_312) and (SCc_311) and (SCc_622) and (SCc_620))
SCc_FUMt2_2	Fumarate transport via proton symport (2 H)	SCc_fum_scc + 2.0 SCc_h_scc --> fum_e + 2.0 h_e	Transport, Extracellular		0	1000	(SCc_075)
SCc_G1PACT	glucosamine-1-phosphate N-acetyltransferase	SCc_accoa_scc + SCc_gam1p_scc --> SCc_acgam1p_scc + SCc_coa_scc + SCc_h_scc	Transport, Extracellular		0	1000	(SCc_009)
SCc_G3PD2	glycerol-3-phosphate dehydrogenase (NADP)	SCc_dhap_scc + SCc_h_scc + SCc_nadph_scc --> SCc_glyc3p_scc + SCc_nadp_scc	Alternate Carbon Metabolism	2.7.1.56	0	1000	(SCc_038)
SCc_G6PDH2r	glucose 6-phosphate dehydrogenase	SCc_g6p_scc + SCc_nadp_scc --> SCc_6pgl_scc + SCc_h_scc + SCc_nadph_scc	Transport, Extracellular		0	1000	(SCc_354)
SCc_GALU	UTP-glucose-1-phosphate uridylyltransferase	SCc_g1p_scc + SCc_h_scc + SCc_utp_scc --> SCc_ppi_scc + SCc_udpg_scc	Transport, Extracellular		0	1000	(SCc_334)
SCc_GAPD	glyceraldehyde-3-phosphate dehydrogenase	SCc_g3p_scc + SCc_nad_scc + SCc_pi_scc --> SCc_13dpg_scc + SCc_h_scc + SCc_nadh_scc	Cell Envelope Biosynthesis	2.3.1.157	0	1000	(SCc_448)
SCc_GARFT	phosphoribosylglycinamide formyltransferase	SCc_10fthf_scc + SCc_gar_scc --> SCc_fgam_scc + SCc_h_scc + SCc_thf_scc	Alternate Carbon Metabolism	1.1.1.94	0	1000	(SCc_302)
SCc_GCALDt	glycolaldehyde_putative_transport	SCc_gcald_scc --> gcald_e	Pentose Phosphate Pathway	1.1.1.49	0	1000	SCc_ORPHAN
SCc_GF6PTA	glutamine-fructose-6-phosphate transaminase	SCc_f6p_scc + SCc_gln_L_scc --> SCc_gam6p_scc + SCc_glu_L_scc	Alternate Carbon Metabolism	2.7.7.9	0	1000	(SCc_010)
SCc_GHMT2	glycine hydroxymethyltransferase	SCc_ser_L_scc + SCc_thf_scc --> SCc_gly_scc + SCc_h2o_scc + SCc_mlthf_scc	Glycolysis/Gluconeogenesis	1.2.1.12	0	1000	(SCc_568)
SCc_GK1	guanylate kinase (GMP:ATP)	SCc_atp_scc + SCc_gmp_scc --> SCc_adp_scc + SCc_gdp_scc	Purine and Pyrimidine Biosynthesis	2.1.2.2	0	1000	(SCc_762)
SCc_GLCpts	D-glucose transport via PEP:Pyr PTS	SCc_pep_scc + glc_D_e --> SCc_g6p_scc + SCc_pyr_scc	Transport, Extracellular		0	1000	(SCc_312 and SCc_311 and SCc_442 and SCc_614)
SCc_GLNabc	L-glutamine transport via ABC system	SCc_atp_scc + SCc_h2o_scc + gln_L_e --> SCc_adp_scc + SCc_gln_L_scc + SCc_h_scc + SCc_pi_scc	Cell Envelope Biosynthesis	2.6.1.16	0	1000	((SCc_544) and (SCc_543) and (SCc_545))
SCc_GLUCYS	gamma-glutamylcysteine synthetase	SCc_atp_scc + SCc_cys_L_scc + SCc_glu_L_scc --> SCc_adp_scc + SCc_glucys_scc + SCc_h_scc + SCc_pi_scc	Glycine and Serine Metabolism	2.1.2.1	0	1000	(SCc_171)
SCc_GLUPRT	glutamine phosphoribosyldiphosphate amidotransferase	SCc_gln_L_scc + SCc_h2o_scc + SCc_prpp_scc --> SCc_glu_L_scc + SCc_ppi_scc + SCc_pram_scc	Nucleotide Salvage Pathway	2.7.4.8	0	1000	(SCc_497)
SCc_GLUR	glutamate racemase	SCc_glu_L_scc --> SCc_glu_D_scc	Transport, Extracellular		0	1000	(SCc_768)
SCc_GLUt	L-glutamate transport via proton symport, reversible	glu_L_e + 2.0 h_e --> SCc_glu_L_scc + 2.0 SCc_h_scc	Transport, Extracellular		0	1000	(SCc_075)
SCc_GLYCt	glycerol_putative_transport	SCc_glyc_scc --> glyc_e	Cofactor and Prosthetic Group Biosynthesis	6.3.2.2	0	1000	SCc_ORPHAN
SCc_GLYt	glycine reversible transport via proton symport	gly_e + h_e --> SCc_gly_scc + SCc_h_scc	Purine and Pyrimidine Biosynthesis	2.4.2.14	0	1000	(SCc_361)
SCc_GMHEPAT	D-glycero-D-manno-hepose 1-phosphate adenyltransferase	SCc_atp_scc + SCc_gmhep1p_scc + SCc_h_scc --> SCc_adphep_DD_scc + SCc_ppi_scc	Cell Envelope Biosynthesis	5.1.1.3	0	1000	(SCc_595)
SCc_GMHEPK	D-glycero-D-manno-heptose 7-phosphate kinase	SCc_atp_scc + SCc_gmhep7p_scc --> SCc_adp_scc + SCc_gmhep17bp_scc + SCc_h_scc	Transport, Extracellular		0	1000	(SCc_595)
SCc_GMHEPPA	D-glycero-D-manno-heptose 1,7-bisphosphate phosphatase	SCc_gmhep17bp_scc + SCc_h2o_scc --> SCc_gmhep1p_scc + SCc_pi_scc	Transport, Extracellular		0	1000	(SCc_224)
SCc_GMPS2	GMP synthase	SCc_atp_scc + SCc_gln_L_scc + SCc_h2o_scc + SCc_xmp_scc --> SCc_amp_scc + SCc_glu_L_scc + SCc_gmp_scc + 2.0 SCc_h_scc + SCc_ppi_scc	Transport, Extracellular		0	1000	(SCc_555)
SCc_GND	phosphogluconate dehydrogenase	SCc_6pgc_scc + SCc_nadp_scc --> SCc_co2_scc + SCc_nadph_scc + SCc_ru5p_D_scc	Cell Envelope Biosynthesis		0	1000	(SCc_529)
SCc_GRTT	geranyltranstransferase	SCc_grdp_scc + SCc_ipdp_scc --> SCc_frdp_scc + SCc_ppi_scc	Cell Envelope Biosynthesis		0	1000	(SCc_474)
SCc_GTHRDt	glutathione_putative_transport	SCc_gthrd_scc --> gthrd_e	Cell Envelope Biosynthesis		0	1000	SCc_ORPHAN
SCc_GTHS	glutathione synthetase	SCc_atp_scc + SCc_glucys_scc + SCc_gly_scc --> SCc_adp_scc + SCc_gthrd_scc + SCc_h_scc + SCc_pi_scc	Purine and Pyrimidine Biosynthesis	6.3.5.2	0	1000	(SCc_016)
SCc_GTPCI	GTP cyclohydrolase I	SCc_gtp_scc + SCc_h2o_scc --> SCc_ahdt_scc + SCc_for_scc + SCc_h_scc	Pentose Phosphate Pathway	1.1.1.44	0	1000	(SCc_538)
SCc_GTPCII2	GTP cyclohydrolase II (25drapp)	SCc_gtp_scc + 3.0 SCc_h2o_scc --> SCc_25drapp_scc + SCc_for_scc + 2.0 SCc_h_scc + SCc_ppi_scc	Cofactor and Prosthetic Group Biosynthesis	2.5.1.10	0	1000	(SCc_372)
SCc_GTPt	GTP_putative_transporter	SCc_gtp_scc --> gtp_e	Transport, Extracellular		0	1000	SCc_ORPHAN
SCc_H2Ot	H2O transport via diffusion	SCc_h2o_scc --> h2o_e	Cofactor and Prosthetic Group Biosynthesis	6.3.2.3	0	1000	(SPONTANEOUS)
SCc_H2St	H2S_putative_diffusion	SCc_h2s_scc --> h2s_e	Cofactor and Prosthetic Group Biosynthesis	3.5.4.16	0	1000	(SPONTANEOUS)
SCc_HCO3E	HCO3 equilibration reaction	SCc_co2_scc + SCc_h2o_scc --> SCc_h_scc + SCc_hco3_scc	Cofactor and Prosthetic Group Biosynthesis	3.5.4.25	0	1000	SPONTANEOUS
SCc_HEMEOS	Heme O synthase	SCc_frdp_scc + SCc_h2o_scc + SCc_pheme_scc --> SCc_hemeO_scc + SCc_ppi_scc	Transport, Extracellular		0	1000	(SCc_475)
SCc_HISt	L-histidine reversible transport via proton symport	h_e + his_L_e --> SCc_h_scc + SCc_his_L_scc	Transport, Extracellular		0	1000	(SCc_625)
SCc_HMBS	hydroxymethylbilane synthase	SCc_h2o_scc + 4.0 SCc_ppbng_scc --> SCc_hmbil_scc + 4.0 SCc_nh4_scc	Transport, Extracellular		0	1000	(SCc_681)
SCc_HPPK2	6-hydroxymethyl-dihydropterin pyrophosphokinase	SCc_6hmhpt_scc + SCc_atp_scc --> SCc_6hmhptpp_scc + SCc_amp_scc + SCc_h_scc	Unassigned	4.2.1.1	0	1000	(SCc_275)
SCc_HXPRT	hypoxanthine phosphoribosyltransferase (Hypoxanthine)	SCc_hxan_scc + SCc_prpp_scc --> SCc_imp_scc + SCc_ppi_scc	Cofactor and Prosthetic Group Biosynthesis		0	1000	(SCc_272)
SCc_HYXNt	Hypoxanthine_putative_transport	hxan_e --> SCc_hxan_scc	Transport, Extracellular		0	1000	SCc_ORPHAN
SCc_IGPS	indole-3-glycerol-phosphate synthase	SCc_2cpr5p_scc + SCc_h_scc --> SCc_3ig3p_scc + SCc_co2_scc + SCc_h2o_scc	Transport, Extracellular		0	1000	(SCc_378)
SCc_ILEt	L-isoleucine reversible transport via proton symport	h_e + ile_L_e --> SCc_h_scc + SCc_ile_L_scc	Cofactor and Prosthetic Group Biosynthesis	4.3.1.8	0	1000	(SCc_286)
SCc_IMPD	IMP dehydrogenase	SCc_h2o_scc + SCc_imp_scc + SCc_nad_scc --> SCc_h_scc + SCc_nadh_scc + SCc_xmp_scc	Cofactor and Prosthetic Group Biosynthesis		0	1000	(SCc_556)
SCc_IPDPS	1-hydroxy-2-methyl-2-(E)-butenyl 4-diphosphate reductase (ipdp)	SCc_h2mb4p_scc + SCc_h_scc + SCc_nadh_scc --> SCc_h2o_scc + SCc_ipdp_scc + SCc_nad_scc	Nucleotide Salvage Pathway	2.4.2.8	0	1000	(SCc_114)
SCc_K2L4ALabc	KDO(2)-lipid IV(A) with laurate transport via ABC system	SCc_atp_scc + SCc_h2o_scc + SCc_kdo2lipid4L_scc --> SCc_adp_scc + SCc_h_scc + SCc_pi_scc + kdo2lipid4L_e	Transport, Extracellular		0	1000	(SCc_511)
SCc_KAS14	beta-ketoacyl-ACP synthase	SCc_acACP_scc + SCc_h_scc + SCc_malACP_scc --> SCc_ACP_scc + SCc_actACP_scc + SCc_co2_scc	Tyrosine, Tryptophan, and Phenylalanine Metabolism	4.1.1.48	0	1000	(SCc_437) or (SCc_616)
SCc_KAS15	beta-ketoacyl-ACP synthase (2)	SCc_accoa_scc + SCc_h_scc + SCc_malACP_scc --> SCc_actACP_scc + SCc_co2_scc + SCc_coa_scc	Transport, Extracellular		0	1000	(SCc_433)
SCc_KAS16	3-hydroxy-myristoyl-ACP synthesis	SCc_ddcaACP_scc + 2.0 SCc_h_scc + SCc_malACP_scc + SCc_nadph_scc --> SCc_3hmrsACP_scc + SCc_ACP_scc + SCc_co2_scc + SCc_nadp_scc	Purine and Pyrimidine Biosynthesis	1.1.1.205	0	1000	((SCc_616) and (SCc_435)) or ((SCc_437) and (SCc_435))
SCc_KDOCT2	3-deoxy-manno-octulosonate cytidylyltransferase	SCc_ctp_scc + SCc_kdo_scc --> SCc_ckdo_scc + SCc_ppi_scc	Cofactor and Prosthetic Group Biosynthesis		0	1000	(SCc_508)
SCc_KDOPP	3-deoxy-manno-octulosonate-8-phosphatase	SCc_h2o_scc + SCc_kdo8p_scc --> SCc_kdo_scc + SCc_pi_scc	Transport, Extracellular		0	1000	SCc_ORPHAN
SCc_KDOPS	3-deoxy -D-manno-octulosonic -acid 8-phosphate synthase	SCc_ara5p_scc + SCc_h2o_scc + SCc_pep_scc --> SCc_kdo8p_scc + SCc_pi_scc	Membrane Lipid Metabolism	2.3.1.41	0	1000	(SCc_414)
SCc_Kt2	potassium_transport_in_via_proton_symport	h_e + k_e --> SCc_h_scc + SCc_k_scc	Membrane Lipid Metabolism		0	999999	(SCc_012 and SCc_069)
SCc_LEUt	L-leucine reversible transport via proton symport	h_e + leu_L_e --> SCc_h_scc + SCc_leu_L_scc	Membrane Lipid Metabolism		0	1000	(SCc_286)
SCc_LPADSS	Lipid A disaccaride synthase	SCc_lipidX_scc + SCc_u23ga_scc --> SCc_h_scc + SCc_lipidAds_scc + SCc_udp_scc	Cell Envelope Biosynthesis	2.7.7.38	0	1000	(SCc_218)
SCc_LPSSYN_SCc	Lipopolysaccharide synthesis (SCc)	3.0 SCc_adphep_LD_scc + 2.0 SCc_cdpea_scc + 3.0 SCc_ckdo_scc + SCc_lipa_scc + 2.0 SCc_udpg_scc --> 3.0 SCc_adp_scc + 2.0 SCc_cdp_scc + 3.0 SCc_cmp_scc + 10.0 SCc_h_scc + SCc_lps_scc + 2.0 SCc_udp_scc	Cell Envelope Biosynthesis	3.1.3.45	0	1000	((SCc_101) and (SCc_047) and (SCc_045) and (SCc_044))
SCc_LYSt	L-lysine reversible transport via proton symport	h_e + lys_L_e --> SCc_h_scc + SCc_lys_L_scc	Cell Envelope Biosynthesis	2.5.1.55	0	1000	(SCc_625)
SCc_MACPD	Malonyl-ACP decarboxylase	SCc_h_scc + SCc_malACP_scc --> SCc_acACP_scc + SCc_co2_scc	Transport, Extracellular		0	1000	(SCc_616)
SCc_MCOATA	Malonyl-CoA-ACP transacylase	SCc_ACP_scc + SCc_malcoa_scc --> SCc_coa_scc + SCc_malACP_scc	Transport, Extracellular		0	1000	(SCc_434 and SCc_436)
SCc_MECDPDH	2C-methyl-D-erythritol 2,4 cyclodiphosphate dehydratase	SCc_2mecdp_scc + SCc_h_scc --> SCc_h2mb4p_scc + SCc_h2o_scc	Cell Envelope Biosynthesis	2.4.1.182	0	1000	(SCc_561)
SCc_MECDPS	2-C-methyl-D-erythritol 2,4-cyclodiphosphate synthase	SCc_2p4c2me_scc --> SCc_2mecdp_scc + SCc_cmp_scc	Cell Envelope Biosynthesis		0	1000	(SCc_163)
SCc_MEPCT	2-C-methyl-D-erythritol 4-phosphate cytidylyltransferase	SCc_2me4p_scc + SCc_ctp_scc + SCc_h_scc --> SCc_4c2me_scc + SCc_ppi_scc	Transport, Extracellular		0	1000	(SCc_162)
SCc_METAT	methionine adenosyltransferase	SCc_atp_scc + SCc_h2o_scc + SCc_met_L_scc --> SCc_amet_scc + SCc_pi_scc + SCc_ppi_scc	Membrane Lipid Metabolism		0	1000	(SCc_278)
SCc_METt	L-methionine_putative_transport	met_L_e --> SCc_met_L_scc	Membrane Lipid Metabolism	2.3.1.39	0	1000	SCc_ORPHAN
SCc_METt_reverse	SCc_METt_reverse	SCc_met_L_scc --> met_L_e	Cofactor and Prosthetic Group Biosynthesis		0	1000	SCc_ORPHAN
SCc_MOAT	3-deoxy-D-manno-octulosonic acid transferase	SCc_ckdo_scc + SCc_lipidA_scc --> SCc_cmp_scc + SCc_h_scc + SCc_kdolipid4_scc	Cofactor and Prosthetic Group Biosynthesis		0	1000	(SCc_035)
SCc_MOAT2	3-deoxy-D-manno-octulosonic acid transferase	SCc_ckdo_scc + SCc_kdolipid4_scc --> SCc_cmp_scc + SCc_h_scc + SCc_kdo2lipid4_scc	Cofactor and Prosthetic Group Biosynthesis		0	1000	(SCc_035)
SCc_MTHFC	methenyltetrahydrofolate cyclohydrolase	SCc_h2o_scc + SCc_methf_scc --> SCc_10fthf_scc + SCc_h_scc	Methionine Metabolism	2.5.1.6	0	1000	(SCc_329)
SCc_MTHFD	methylenetetrahydrofolate dehydrogenase (NADP)	SCc_mlthf_scc + SCc_nadp_scc --> SCc_methf_scc + SCc_nadph_scc	Transport, Extracellular		0	1000	(SCc_329)
SCc_NADH5	NADH dehydrogenase (ubiquinone-8 )	SCc_h_scc + SCc_nadh_scc + SCc_q8_scc --> SCc_nad_scc + SCc_q8h2_scc	Cell Envelope Biosynthesis		0	1000	(SCc_445)
SCc_NADK	NAD kinase	SCc_atp_scc + SCc_nad_scc --> SCc_adp_scc + SCc_h_scc + SCc_nadp_scc	Cell Envelope Biosynthesis		0	1000	(SCc_241)
SCc_NADPt	NADP_putative_transporter	SCc_nadp_scc --> nadp_e	Folate Metabolism	3.5.4.9	0	1000	SCc_ORPHAN
SCc_NADS1	NAD synthase (nh3)	SCc_atp_scc + SCc_dnad_scc + SCc_nh4_scc --> SCc_amp_scc + SCc_h_scc + SCc_nad_scc + SCc_ppi_scc	Folate Metabolism	1.5.1.5	0	1000	(SCc_569)
SCc_NADt	NAD_putative_transporter	SCc_nad_scc --> nad_e	Oxidative Phosphorylation	1.6.5.9	0	1000	SCc_ORPHAN
SCc_NDPK1	nucleoside-diphosphate kinase (ATP:GDP)	SCc_atp_scc + SCc_gdp_scc --> SCc_adp_scc + SCc_gtp_scc	Cofactor and Prosthetic Group Biosynthesis	2.7.1.23	0	1000	(SCc_564)
SCc_NDPK2	nucleoside-diphosphate kinase (ATP:UDP)	SCc_atp_scc + SCc_udp_scc --> SCc_adp_scc + SCc_utp_scc	Transport, Extracellular		0	1000	(SCc_564)
SCc_NDPK3	nucleoside-diphosphate kinase (ATP:CDP)	SCc_atp_scc + SCc_cdp_scc <=> SCc_adp_scc + SCc_ctp_scc	Cofactor and Prosthetic Group Biosynthesis	6.3.1.5	-1000	1000	(SCc_564)
SCc_NDPK4	nucleoside-diphosphate kinase (ATP:dTDP)	SCc_atp_scc + SCc_dtdp_scc --> SCc_adp_scc + SCc_dttp_scc	Transport, Extracellular		0	1000	(SCc_564)
SCc_NDPK5	nucleoside-diphosphate kinase (ATP:dGDP)	SCc_atp_scc + SCc_dgdp_scc --> SCc_adp_scc + SCc_dgtp_scc	Nucleotide Salvage Pathway	2.7.4.6	0	1000	(SCc_564)
SCc_NDPK6	nucleoside_diphosphate_kinase__ATPdUDP_	SCc_atp_scc + SCc_dudp_scc <=> SCc_adp_scc + SCc_dutp_scc	Nucleotide Salvage Pathway	2.7.4.6	-999999	999999	SCc_364
SCc_NDPK7	nucleoside-diphosphate kinase (ATP:dCDP)	SCc_atp_scc + SCc_dcdp_scc --> SCc_adp_scc + SCc_dctp_scc	Nucleotide Salvage Pathway	2.7.4.6	0	1000	(SCc_564)
SCc_NDPK8	nucleoside-diphosphate kinase (ATP:dADP)	SCc_atp_scc + SCc_dadp_scc --> SCc_adp_scc + SCc_datp_scc	Nucleotide Salvage Pathway	2.7.4.6	0	1000	(SCc_564)
SCc_NH4t	ammonia transport via diffusion	nh4_e <=> SCc_nh4_scc	Nucleotide Salvage Pathway	2.7.4.6	-1000	1000	(SPONTANEOUS)
SCc_NICRNTt	Nicotinate_D-ribonucleotide_putative_transporter	nicrnt_e --> SCc_nicrnt_scc	Nucleotide Salvage Pathway	2.7.4.6	0	1000	(SCc_295)
SCc_NNAT	nicotinate-nucleotide adenylyltransferase	SCc_atp_scc + SCc_h_scc + SCc_nicrnt_scc --> SCc_dnad_scc + SCc_ppi_scc	Nucleotide Salvage Pathway	2.7.4.6	0	1000	(SCc_257)
SCc_O2t	o2 transport (diffusion)	o2_e --> SCc_o2_scc	Nucleotide Salvage Pathway	2.7.4.6	0	1000	(SPONTANEOUS)
SCc_OHPBAT	O-Phospho-4-hydroxy-L-threonine:2-oxoglutarate aminotransferase	SCc_glu_L_scc + SCc_ohpb_scc --> SCc_akg_scc + SCc_phthr_scc	Transport, Extracellular		0	1000	(SCc_516)
SCc_OMPDC	orotidine-5-phosphate decarboxylase	SCc_h_scc + SCc_orot5p_scc --> SCc_co2_scc + SCc_ump_scc	Transport, Extracellular		0	1000	(SCc_711)
SCc_ORPT	orotate phosphoribosyltransferase	SCc_orot_scc + SCc_prpp_scc --> SCc_orot5p_scc + SCc_ppi_scc	Cofactor and Prosthetic Group Biosynthesis	2.7.7.18	0	1000	(SCc_027)
SCc_PAPPT3	phospho-N-acetylmuramoyl-pentapeptide-transferase (meso-2,6-diaminopimelate)	SCc_udcpp_scc + SCc_ugmda_scc --> SCc_uagmda_scc + SCc_ump_scc	Transport, Extracellular		0	1000	(SCc_134)
SCc_PAPSR	phosphoadenylyl-sulfate reductase (thioredoxin)	SCc_paps_scc + SCc_trdrd_scc --> 2.0 SCc_h_scc + SCc_pap_scc + SCc_so3_scc + SCc_trdox_scc	Cofactor and Prosthetic Group Biosynthesis	2.6.1.52	0	1000	((SCc_156) and (SCc_706))
SCc_PASYN_SCc	Phosphatidic acid synthase (SCc)	SCc_glyc3p_scc + 0.14 SCc_hdeACP_scc + 0.04 SCc_myrsACP_scc + SCc_octeACP_scc + 0.72 SCc_palmACP_scc + 0.1 SCc_tdeACP_scc --> 2.0 SCc_ACP_scc + 0.02 SCc_pa_scc	Purine and Pyrimidine Biosynthesis	4.1.1.23	0	1000	((SCc_587) and (SCc_015))
SCc_PDH	pyruvate dehydrogenase	SCc_coa_scc + SCc_nad_scc + SCc_pyr_scc --> SCc_accoa_scc + SCc_co2_scc + SCc_nadh_scc	Purine and Pyrimidine Biosynthesis	2.4.2.10	0	1000	((SCc_574) and (SCc_572) and (SCc_573))
SCc_PDX5PO2	pyridoxine-5-phosphate oxidase (anaerboic)	SCc_nad_scc + SCc_pdx5p_scc --> SCc_h_scc + SCc_nadh_scc + SCc_pydx5p_scc	Cell Envelope Biosynthesis	2.7.8.13	0	1000	SCc_ORPHAN
SCc_PDX5PS	Pyridoxine 5-phosphate synthase	SCc_dxyl5p_scc + SCc_nad_scc + SCc_phthr_scc --> SCc_co2_scc + 2.0 SCc_h2o_scc + SCc_h_scc + SCc_nadh_scc + SCc_pdx5p_scc + SCc_pi_scc	Cysteine Metabolism	1.8.4.8	0	1000	(SCc_249 and SCc_122)
SCc_PEPT_SCc	ethanolamine phosphotransferase	SCc_cmp_scc + SCc_h_scc + 0.02 SCc_pe_scc --> 0.02 SCc_12dgr_scc + SCc_cdpea_scc	Membrane Lipid Metabolism		0	1000	SCc_ORPHAN
SCc_PERD	Erythronate 4-phosphate (4per) dehydrogenase	SCc_4per_scc + SCc_nad_scc --> SCc_h_scc + SCc_nadh_scc + SCc_ohpb_scc	Glycolysis/Gluconeogenesis	1.2.5.1	0	1000	(SCc_491)
SCc_PFK	phosphofructokinase	SCc_atp_scc + SCc_f6p_scc --> SCc_adp_scc + SCc_fdp_scc + SCc_h_scc	Cofactor and Prosthetic Group Biosynthesis	1.4.3.5	0	1000	(SCc_678)
SCc_PGAMT	phosphoglucosamine mutase	SCc_gam6p_scc --> SCc_gam1p_scc	Cofactor and Prosthetic Group Biosynthesis		0	1000	(SCc_060)
SCc_PGI	glucose-6-phosphate isomerase	SCc_g6p_scc <=> SCc_f6p_scc	Cell Envelope Biosynthesis	2.7.8.1	-1000	1000	(SCc_014)
SCc_PGK	phosphoglycerate kinase	SCc_13dpg_scc + SCc_adp_scc --> SCc_3pg_scc + SCc_atp_scc	Cofactor and Prosthetic Group Biosynthesis	1.1.1.290	0	1000	(SCc_185)
SCc_PGL	6-phosphogluconolactonase	SCc_6pgl_scc + SCc_h2o_scc --> SCc_6pgc_scc + SCc_h_scc	Glycolysis/Gluconeogenesis	2.7.1.11	0	1000	(SCc_297)
SCc_PGM	phosphoglycerate mutase	SCc_3pg_scc --> SCc_2pg_scc	Cell Envelope Biosynthesis	5.4.2.10	0	1000	(SCc_296)
SCc_PGMT	phosphoglucomutase	SCc_g6p_scc --> SCc_g1p_scc	Glycolysis/Gluconeogenesis	5.3.1.9	0	1000	(SCc_253)
SCc_PGPP_SCc	Phosphatidylglycerol phosphate phosphatase (SCc)	SCc_h2o_scc + 0.02 SCc_pgp_scc --> 0.02 SCc_pg_scc + SCc_pi_scc	Glycolysis/Gluconeogenesis	2.7.2.3	0	1000	(SCc_472)
SCc_PGSA_SCc	Phosphatidylglycerol synthase (SCc)	0.02 SCc_cdpdag_scc + SCc_glyc3p_scc --> SCc_cmp_scc + SCc_h_scc + 0.02 SCc_pgp_scc	Pentose Phosphate Pathway	3.1.1.31	0	1000	(SCc_457)
SCc_PHEMEt	pheme_putative_transporter	SCc_pheme_scc --> pheme_e	Glycolysis/Gluconeogenesis	5.4.2.1	0	1000	SCc_ORPHAN
SCc_PHEt	L-phenylalanine_putative_transport	phe_L_e --> SCc_phe_L_scc	Alternate Carbon Metabolism	5.4.2.2	0	1000	SCc_ORPHAN
SCc_PIt	phosphate reversible transport via symport	h_e + pi_e --> SCc_h_scc + SCc_pi_scc	Membrane Lipid Metabolism	3.1.3.27	0	1000	(SCc_712)
SCc_PMDPHT	pyrimidine phosphatase	SCc_5aprbu_scc + SCc_h2o_scc --> SCc_4r5au_scc + SCc_pi_scc	Membrane Lipid Metabolism	2.7.8.5	0	1000	(SCc_385)
SCc_PNTK	pantothenate kinase	SCc_atp_scc + SCc_pnto_R_scc --> SCc_4ppan_scc + SCc_adp_scc + SCc_h_scc	Transport, Extracellular		0	1000	(SCc_734)
SCc_PNTOt	Pantothenate_putative_transporter	pnto_R_e --> SCc_pnto_R_scc	Transport, Extracellular		0	1000	SCc_ORPHAN
SCc_PPA	inorganic diphosphatase	SCc_h2o_scc + SCc_ppi_scc --> SCc_h_scc + 2.0 SCc_pi_scc	Transport, Extracellular		0	1000	(SCc_299 or SCc_068 )
SCc_PPA2	inorganic_triphosphatase	SCc_h2o_scc + SCc_pppi_scc --> SCc_h_scc + SCc_pi_scc + SCc_ppi_scc	Cofactor and Prosthetic Group Biosynthesis	2.5.1.78	0	999999	(SCc_299 or SCc_068 )
SCc_PPBNGt	Phorphobilinogen_putative_transport	ppbng_e --> SCc_ppbng_scc	Cofactor and Prosthetic Group Biosynthesis	2.7.1.33	0	1000	SCc_ORPHAN
SCc_PPCDC	phosphopantothenoylcysteine decarboxylase	SCc_4ppcys_scc + SCc_h_scc --> SCc_co2_scc + SCc_pan4p_scc	Transport, Extracellular		0	1000	SCc_ORPHAN
SCc_PPK2r	polyphosphate_kinase	SCc_atp_scc + SCc_ppi_scc --> SCc_adp_scc + SCc_pppi_scc	Anaplerotic reactions	3.6.1.1	0	999999	SCc_300
SCc_PPKr	polyphosphate_kinase	SCc_atp_scc + SCc_pi_scc <=> SCc_adp_scc + SCc_ppi_scc	Anaplerotic reactions	3.6.1.1	-999999	999999	SCc_300
SCc_PPNCL2	phosphopantothenate-cysteine ligase	SCc_4ppan_scc + SCc_ctp_scc + SCc_cys_L_scc --> SCc_4ppcys_scc + SCc_cmp_scc + SCc_h_scc + SCc_ppi_scc	Transport, Extracellular		0	1000	SCc_ORPHAN
SCc_PPPGO	protoporphyrinogen oxidase (aerobic)	1.5 SCc_o2_scc + SCc_pppg9_scc --> 3.0 SCc_h2o_scc + SCc_ppp9_scc	Cofactor and Prosthetic Group Biosynthesis	4.1.1.36	0	1000	(SCc_013)
SCc_PPTGS	Peptidoglycan subunit synthesis	SCc_uaagmda_scc --> SCc_h_scc + SCc_peptido_scc + SCc_udcpdp_scc	Oxidative Phosphorylation	2.7.4.1	0	1000	(SCc_634)
SCc_PRAGSr	phosphoribosylglycinamide synthase	SCc_atp_scc + SCc_gly_scc + SCc_pram_scc --> SCc_adp_scc + SCc_gar_scc + SCc_h_scc + SCc_pi_scc	Oxidative Phosphorylation	2.7.4.1	0	1000	(SCc_718)
SCc_PRAIi	phosphoribosylanthranilate isomerase (irreversible)	SCc_pran_scc --> SCc_2cpr5p_scc	Cofactor and Prosthetic Group Biosynthesis	6.3.2.5	0	1000	(SCc_378)
SCc_PRAIS	phosphoribosylaminoimidazole synthase	SCc_atp_scc + SCc_fpram_scc --> SCc_adp_scc + SCc_air_scc + 2.0 SCc_h_scc + SCc_pi_scc	Cofactor and Prosthetic Group Biosynthesis	1.3.3.4	0	1000	(SCc_303)
SCc_PRFGS	phosphoribosylformylglycinamidine synthase	SCc_atp_scc + SCc_fgam_scc + SCc_gln_L_scc + SCc_h2o_scc --> SCc_adp_scc + SCc_fpram_scc + SCc_glu_L_scc + SCc_h_scc + SCc_pi_scc	Cell Envelope Biosynthesis		0	1000	(SCc_570)
SCc_PROt	L-proline reversible transport via proton symport	h_e + pro_L_e --> SCc_h_scc + SCc_pro_L_scc	Purine and Pyrimidine Biosynthesis	6.3.4.13	0	1000	(SCc_325)
SCc_PRPPS	phosphoribosylpyrophosphate synthetase	SCc_atp_scc + SCc_r5p_scc --> SCc_amp_scc + SCc_h_scc + SCc_prpp_scc	Tyrosine, Tryptophan, and Phenylalanine Metabolism	5.3.1.24	0	1000	(SCc_419)
SCc_PSCVT	3_phosphoshikimate_1_carboxyvinyltransferase	SCc_pep_scc + SCc_skm5p_scc --> SCc_3psme_scc + SCc_pi_scc	Purine and Pyrimidine Biosynthesis	6.3.3.1	0	1000	( SCc_515 )
SCc_PSD_SCc	Phosphatidylserine decarboxylase (SCc)	SCc_h_scc + 0.02 SCc_ps_scc --> SCc_co2_scc + 0.02 SCc_pe_scc	Purine and Pyrimidine Biosynthesis	6.3.5.3	0	1000	(SCc_078)
SCc_PSSA_SCc	Phosphatidylserine syntase (SCc)	0.02 SCc_cdpdag_scc + SCc_ser_L_scc --> SCc_cmp_scc + SCc_h_scc + 0.02 SCc_ps_scc	Transport, Extracellular		0	1000	(SCc_225)
SCc_PTAr	phosphotransacetylase	SCc_accoa_scc + SCc_pi_scc --> SCc_actp_scc + SCc_coa_scc	Histidine Metabolism	2.7.6.1	0	1000	(SCc_500)
SCc_PTPATi	pantetheine-phosphate adenylyltransferase	SCc_atp_scc + SCc_h_scc + SCc_pan4p_scc --> SCc_dpcoa_scc + SCc_ppi_scc	Tyrosine Tryptophan and Phenylalanine Metabolism	2.5.1.19	0	1000	(SCc_033)
SCc_PYDX5Pt	Pyridoxal-5-phosphate_putative_transporter	SCc_pydx5p_scc --> pydx5p_e	Membrane Lipid Metabolism	4.1.1.65	0	1000	SCc_ORPHAN
SCc_PYK	pyruvate kinase	SCc_adp_scc + SCc_h_scc + SCc_pep_scc --> SCc_atp_scc + SCc_pyr_scc	Membrane Lipid Metabolism	2.7.8.8	0	1000	(SCc_388)
SCc_RBFK	riboflavin kinase	SCc_atp_scc + SCc_ribflv_scc --> SCc_adp_scc + SCc_fmn_scc + SCc_h_scc	Pyruvate Metabolism	2.3.1.8	0	1000	(SCc_111)
SCc_RBFSa	riboflavin synthase	SCc_4r5au_scc + SCc_db4p_scc --> SCc_dmlz_scc + 2.0 SCc_h2o_scc + SCc_pi_scc	Cofactor and Prosthetic Group Biosynthesis	2.7.7.3	0	1000	(SCc_385)
SCc_RBFSb	riboflavin synthase	2.0 SCc_dmlz_scc --> SCc_4r5au_scc + SCc_ribflv_scc	Transport, Extracellular		0	1000	(SCc_469)
SCc_RIBFLVt	Riboflavine_putative_transporter	SCc_ribflv_scc --> ribflv_e	Glycolysis/Gluconeogenesis	2.7.1.40	0	1000	(SCc_295)
SCc_RNDR1	ribonucleoside-diphosphate reductase (ADP)	SCc_adp_scc + SCc_trdrd_scc --> SCc_dadp_scc + SCc_h2o_scc + SCc_trdox_scc	Cofactor and Prosthetic Group Biosynthesis	2.7.1.26	0	1000	((SCc_461) and (SCc_462) and (SCc_706))
SCc_RNDR2	ribonucleoside-diphosphate reductase (GDP)	SCc_gdp_scc + SCc_trdrd_scc --> SCc_dgdp_scc + SCc_h2o_scc + SCc_trdox_scc	Cofactor and Prosthetic Group Biosynthesis	2.5.1.9	0	1000	(SCc_461 and SCc_462)
SCc_RNDR3	ribonucleoside-diphosphate reductase (CDP)	SCc_cdp_scc + SCc_trdrd_scc --> SCc_dcdp_scc + SCc_h2o_scc + SCc_trdox_scc	Cofactor and Prosthetic Group Biosynthesis	2.5.1.9	0	1000	(SCc_461 and SCc_462)
SCc_RNDR4	ribonucleoside-diphosphate reductase (UDP)	SCc_trdrd_scc + SCc_udp_scc --> SCc_dudp_scc + SCc_h2o_scc + SCc_trdox_scc	Transport, Extracellular		0	1000	(SCc_461 and SCc_462)
SCc_RPE	ribulose 5-phosphate 3-epimerase	SCc_ru5p_D_scc <=> SCc_xu5p_D_scc	Nucleotide Salvage Pathway	1.17.4.1	-1000	1000	(SCc_636)
SCc_RPI	ribose-5-phosphate isomerase	SCc_ru5p_D_scc --> SCc_r5p_scc	Nucleotide Salvage Pathway	1.17.4.1	0	1000	(SCc_187)
SCc_S7PI	sedoheptulose 7-phosphate isomerase	SCc_s7p_scc --> SCc_gmhep7p_scc	Nucleotide Salvage Pathway	1.17.4.1	0	1000	(SCc_228)
SCc_SADT2	Sulfate adenyltransferase	SCc_atp_scc + SCc_gtp_scc + SCc_h2o_scc + SCc_so4_scc --> SCc_aps_scc + SCc_gdp_scc + SCc_pi_scc + SCc_ppi_scc	Nucleotide Salvage Pathway	1.17.4.1	0	1000	(SCc_159 and SCc_158)
SCc_SDPDS	succinyl-diaminopimelate desuccinylase	SCc_h2o_scc + SCc_sl26da_scc --> SCc_26dap_LL_scc + SCc_succ_scc	Pentose Phosphate Pathway	5.1.3.1	0	1000	(SCc_332)
SCc_SDPTA	succinyldiaminopimelate transaminase	SCc_glu_L_scc + SCc_sl2a6o_scc --> SCc_akg_scc + SCc_sl26da_scc	Pentose Phosphate Pathway	5.3.1.6	0	1000	SCc_516
SCc_SERAT	serine O-acetyltransferase	SCc_accoa_scc + SCc_ser_L_scc --> SCc_acser_scc + SCc_coa_scc	Cell Envelope Biosynthesis		0	1000	(SCc_037)
SCc_SERt	L-serine reversible transport via proton symport	h_e + ser_L_e --> SCc_h_scc + SCc_ser_L_scc	Cysteine Metabolism	2.7.7.4	0	1000	(SCc_528)
SCc_SHCHD2	sirohydrochlorin dehydrogenase (NAD)	SCc_dscl_scc + SCc_nad_scc --> SCc_h_scc + SCc_nadh_scc + SCc_scl_scc	Threonine and Lysine Metabolism	3.5.1.18	0	1000	(SCc_157)
SCc_SHCHF	sirohydrochlorin ferrochetalase	SCc_fe2_scc + SCc_scl_scc --> 3.0 SCc_h_scc + SCc_sheme_scc	Threonine and Lysine Metabolism	2.6.1.17	0	1000	(SCc_157)
SCc_SHEMEt	Siroheme_putative_transporter	SCc_sheme_scc --> sheme_e	Cysteine Metabolism	2.3.1.30	0	1000	SCc_ORPHAN
SCc_SHKK	shikimate_kinase	SCc_atp_scc + SCc_skm_scc --> SCc_adp_scc + SCc_h_scc + SCc_skm5p_scc	Transport, Extracellular		0	1000	( SCc_638 )
SCc_SKMt	shikimate_putative_transporter	skm_e --> SCc_skm_scc	Cofactor and Prosthetic Group Biosynthesis		0	1000	SCc_ORPHAN
SCc_SUCOAS	succinyl-CoA synthetase (ADP-forming)	SCc_atp_scc + SCc_coa_scc + SCc_succ_scc --> SCc_adp_scc + SCc_pi_scc + SCc_succoa_scc	Cofactor and Prosthetic Group Biosynthesis		0	1000	(SCc_252 and SCc_251)
SCc_SULabc	sulfate transport via ABC system	SCc_atp_scc + SCc_h2o_scc + so4_e --> SCc_adp_scc + SCc_h_scc + SCc_pi_scc + SCc_so4_scc	Transport, Extracellular		0	1000	((SCc_310) and (SCc_309) and (SCc_308) and (SCc_677))
SCc_SULR	sulfite reductase (NADPH2)	5.0 SCc_h_scc + 3.0 SCc_nadph_scc + SCc_so3_scc --> 3.0 SCc_h2o_scc + SCc_h2s_scc + 3.0 SCc_nadp_scc	Tyrosine Tryptophan and Phenylalanine Metabolism	2.7.1.71	0	1000	(SCc_154 and SCc_155)
SCc_TALA	transaldolase	SCc_g3p_scc + SCc_s7p_scc <=> SCc_e4p_scc + SCc_f6p_scc	Transport, Extracellular		-1000	1000	(SCc_108)
SCc_TDSK	Tetraacyldisaccharide 4kinase	SCc_atp_scc + SCc_lipidAds_scc --> SCc_adp_scc + SCc_h_scc + SCc_lipidA_scc	Citric Acid Cycle	6.2.1.5	0	1000	(SCc_510)
SCc_THDPS	tetrahydrodipicolinate succinylase	SCc_h2o_scc + SCc_succoa_scc + SCc_thdp_scc --> SCc_coa_scc + SCc_sl2a6o_scc	Transport, Extracellular		0	1000	(SCc_203)
SCc_THFt	Tetrahydrofolate_putative_transporter	SCc_thf_scc --> thf_e	Cysteine Metabolism	1.8.1.2	0	1000	SCc_ORPHAN
SCc_THMabc	thiamine transport via ABC system	SCc_atp_scc + SCc_h2o_scc + thm_e --> SCc_adp_scc + SCc_h_scc + SCc_pi_scc + SCc_thm_scc	Pentose Phosphate Pathway	2.2.1.2	0	1000	((SCc_126) and (SCc_127) and (SCc_128))
SCc_THMPPt	Thiamine diphosphate_putative_transporter	SCc_thmpp_scc --> thmpp_e	Cell Envelope Biosynthesis	2.7.1.130	0	1000	SCc_ORPHAN
SCc_THRt	L-threonine_putative_transport	thr_L_e --> SCc_thr_L_scc	Threonine and Lysine Metabolism	2.3.1.117	0	1000	SCc_ORPHAN
SCc_TKT1	transketolase	SCc_r5p_scc + SCc_xu5p_D_scc <=> SCc_g3p_scc + SCc_s7p_scc	Transport, Extracellular		-1000	1000	(SCc_184)
SCc_TKT2	transketolase	SCc_e4p_scc + SCc_xu5p_D_scc <=> SCc_f6p_scc + SCc_g3p_scc	Transport, Extracellular		-1000	1000	(SCc_184)
SCc_TMDS	thymidylate synthase	SCc_dump_scc + SCc_mlthf_scc --> SCc_dhf_scc + SCc_dtmp_scc	Transport, Extracellular		0	1000	(SCc_196)
SCc_TMKr	thiamine kinase	SCc_atp_scc + SCc_thm_scc --> SCc_adp_scc + SCc_h_scc + SCc_thmmp_scc	Transport, Extracellular		0	1000	(SCc_444)
SCc_TMPKr	thiamine-phosphate kinase	SCc_atp_scc + SCc_thmmp_scc --> SCc_adp_scc + SCc_thmpp_scc	Pentose Phosphate Pathway	2.2.1.1	0	1000	(SCc_471)
SCc_TPI	triose-phosphate isomerase	SCc_dhap_scc --> SCc_g3p_scc	Pentose Phosphate Pathway	2.2.1.1	0	1000	(SCc_676)
SCc_TRDR	thioredoxin reductase (NADPH)	SCc_h_scc + SCc_nadph_scc + SCc_trdox_scc --> SCc_nadp_scc + SCc_trdrd_scc	Nucleotide Salvage Pathway	2.1.1.45	0	1000	(SCc_520 and SCc_706)
SCc_TRPS2	tryptophan synthase (indole)	SCc_indole_scc + SCc_ser_L_scc --> SCc_h2o_scc + SCc_trp_L_scc	Cofactor and Prosthetic Group Biosynthesis	2.7.1.89	0	1000	(SCc_380 and SCc_379)
SCc_TRPS3	tryptophan synthase (indoleglycerol phosphate)	SCc_3ig3p_scc --> SCc_g3p_scc + SCc_indole_scc	Cofactor and Prosthetic Group Biosynthesis	2.7.4.16	0	1000	(SCc_380 and SCc_379)
SCc_TRPt	L-tryptophan_putative_transport	SCc_trp_L_scc --> trp_L_e	Glycolysis/Gluconeogenesis	5.3.1.1	0	1000	SCc_ORPHAN
SCc_TYRt	L-tyrosine_putative_transport	tyr_L_e --> SCc_tyr_L_scc	Oxidative Phosphorylation	1.8.1.9	0	1000	SCc_ORPHAN
SCc_U23GAAT	UDP-3-O-(3-hydroxymyristoyl)glucosamine acyltransferase	SCc_3hmrsACP_scc + SCc_u3hga_scc --> SCc_ACP_scc + SCc_h_scc + SCc_u23ga_scc	Tyrosine, Tryptophan, and Phenylalanine Metabolism	4.2.1.20	0	1000	(SCc_215)
SCc_UAAGDS	UDP-N-acetylmuramoyl-L-alanyl-D-glutamyl-meso-2,6-diaminopimelate synthetase	SCc_26dap_M_scc + SCc_atp_scc + SCc_uamag_scc --> SCc_adp_scc + SCc_h_scc + SCc_pi_scc + SCc_ugmd_scc	Tyrosine, Tryptophan, and Phenylalanine Metabolism	4.2.1.20	0	1000	(SCc_132)
SCc_UAGAAT	UDP-N-acetylglucosamine acyltransferase	SCc_3hmrsACP_scc + SCc_uacgam_scc --> SCc_ACP_scc + SCc_u3aga_scc	Transport, Extracellular		0	1000	(SCc_217 and SCc_436)
SCc_UAGCVT	UDP-N-acetylglucosamine 1-carboxyvinyltransferase	SCc_pep_scc + SCc_uacgam_scc --> SCc_pi_scc + SCc_uaccg_scc	Transport, Extracellular		0	1000	(SCc_603)
SCc_UAGDP	UDP-N-acetylglucosamine diphosphorylase	SCc_acgam1p_scc + SCc_h_scc + SCc_utp_scc --> SCc_ppi_scc + SCc_uacgam_scc	Cell Envelope Biosynthesis		0	1000	(SCc_009)
SCc_UAGPT3	UDP-N-acetylglucosamine-N-acetylmuramyl-(pentapeptide)pyrophosphoryl-undecaprenol N-acetylglucosamine transferase	SCc_uacgam_scc + SCc_uagmda_scc --> SCc_h_scc + SCc_uaagmda_scc + SCc_udp_scc	Cell Envelope Biosynthesis	6.3.2.13	0	1000	(SCc_137)
SCc_UAMAGS	UDP-N-acetylmuramoyl-L-alanyl-D-glutamate synthetase	SCc_atp_scc + SCc_glu_D_scc + SCc_uama_scc --> SCc_adp_scc + SCc_h_scc + SCc_pi_scc + SCc_uamag_scc	Cell Envelope Biosynthesis	2.3.1.129	0	1000	(SCc_135)
SCc_UAMAS	UDP-N-acetylmuramoyl-L-alanine synthetase	SCc_ala_L_scc + SCc_atp_scc + SCc_uamr_scc --> SCc_adp_scc + SCc_h_scc + SCc_pi_scc + SCc_uama_scc	Cell Envelope Biosynthesis	2.5.1.7	0	1000	(SCc_138)
SCc_UAPGR	UDP-N-acetylenolpyruvoylglucosamine reductase	SCc_h_scc + SCc_nadph_scc + SCc_uaccg_scc --> SCc_nadp_scc + SCc_uamr_scc	Cell Envelope Biosynthesis	2.7.7.23	0	1000	(SCc_736)
SCc_UDCPDP	undecaprenyl-diphosphatase	SCc_h2o_scc + SCc_udcpdp_scc --> SCc_h_scc + SCc_pi_scc + SCc_udcpp_scc	Cell Envelope Biosynthesis	2.4.1.150	0	1000	(SCc_527)
SCc_UDCPDPS	Undecaprenyl diphosphate synthase	SCc_frdp_scc + 8.0 SCc_ipdp_scc --> 8.0 SCc_ppi_scc + SCc_udcpdp_scc	Cell Envelope Biosynthesis	6.3.2.9	0	1000	(SCc_210)
SCc_UDPGD	UDPglucose 6-dehydrogenase	SCc_h2o_scc + 2.0 SCc_nad_scc + SCc_udpg_scc --> 3.0 SCc_h_scc + 2.0 SCc_nadh_scc + SCc_udpglcur_scc	Cell Envelope Biosynthesis	6.3.2.8	0	1000	(SCc_335)
SCc_UDPGLCURt	UDP_D_glucuronate_putative_transporter	SCc_udpglcur_scc --> udpglcur_e	Cell Envelope Biosynthesis	1.1.1.158	0	1000	SCc_ORPHAN
SCc_UGMDDS	UDP-N-acetylmuramoyl-L-alanyl-D-glutamyl-meso-2,6-diaminopimeloyl-D-alanyl-D-alanine synthetase	SCc_alaala_scc + SCc_atp_scc + SCc_ugmd_scc --> SCc_adp_scc + SCc_h_scc + SCc_pi_scc + SCc_ugmda_scc	Cell Envelope Biosynthesis	3.6.1.27	0	1000	(SCc_133)
SCc_UHGADA	UDP-3-O-acetylglucosamine deacetylase	SCc_h2o_scc + SCc_u3aga_scc --> SCc_ac_scc + SCc_u3hga_scc	Cofactor and Prosthetic Group Biosynthesis		0	1000	(SCc_143)
SCc_UMPK	UMP kinase	SCc_atp_scc + SCc_ump_scc --> SCc_adp_scc + SCc_udp_scc	Cell Envelope Biosynthesis	1.1.1.22	0	1000	(SCc_207) or (SCc_514)
SCc_UPP3MT	uroporphyrinogen methyltransferase	2.0 SCc_amet_scc + SCc_uppg3_scc --> 2.0 SCc_ahcys_scc + SCc_dscl_scc + SCc_h_scc	Transport, Extracellular		0	1000	(SCc_157)
SCc_UPP3S	uroporphyrinogen-III synthase	SCc_hmbil_scc --> SCc_h2o_scc + SCc_uppg3_scc	Cell Envelope Biosynthesis	6.3.2.15	0	1000	(SCc_680)
SCc_UPPDC1	uroporphyrinogen decarboxylase (uroporphyrinogen III)	4.0 SCc_h_scc + SCc_uppg3_scc --> 4.0 SCc_co2_scc + SCc_cpppg3_scc	Cell Envelope Biosynthesis		0	1000	(SCc_719)
SCc_URIDK2r	uridylate kinase (dUMP)	SCc_atp_scc + SCc_dump_scc <=> SCc_adp_scc + SCc_dudp_scc	Nucleotide Salvage Pathway	2.7.4.14	-1000	1000	(SCc_207)
SCc_USHD	UDP-sugar hydrolase	SCc_h2o_scc + SCc_u23ga_scc --> 2.0 SCc_h_scc + SCc_lipidX_scc + SCc_ump_scc	Cofactor and Prosthetic Group Biosynthesis	2.1.1.107	0	1000	SCc_331
SCc_UTPt	UTP_putative_transporter	SCc_utp_scc --> utp_e	Cofactor and Prosthetic Group Biosynthesis	4.2.1.75	0	1000	SCc_ORPHAN
SCc_VALt	L-valine reversible transport via proton symport	h_e + val_L_e --> SCc_h_scc + SCc_val_L_scc	Cofactor and Prosthetic Group Biosynthesis	4.1.1.37	0	1000	(SCc_286)
SCc_ZNabc	zinc_Zn2_transport_via_ABC_system	SCc_atp_scc + SCc_h2o_scc + zn2_e --> SCc_adp_scc + SCc_h_scc + SCc_pi_scc + SCc_zn2_scc	Nucleotide Salvage Pathway		0	999999	SCc_368 and SCc_367
			Cell Envelope Biosynthesis	3.6.1.54
			Transport, Extracellular
			Transport, Extracellular
			Inorganic Ion Transport and Metabolism

## Sheet: Exchanges
R_ID	Name	Reaction formula	LB	UB
EX_4ampm_e	4-Amino-2-methyl-5-phosphomethylpyrimidine exchange	4ampm_e -->	0	1000
EX_4pasp_e	4-Phospho-L-aspartate exchange	4pasp_e <--	-1000	0
EX_ac_e	Acetate exchange	ac_e -->	0	1000
EX_ahcys_e	Adenosyl-homocysteine exchange	ahcys_e -->	0	1000
EX_aicar_e	R_AICAR_exchange	aicar_e -->	0	1000
EX_akg_e	2-Oxoglutarate exchange	akg_e -->	0	1000
EX_ala_D_e	D-Alanine exchange	ala_D_e <--	-1000	0
EX_ala_L_e	L-Alanine exchange	ala_L_e <--	-1000	0
EX_amet_e	S-Adenosyl-L-methionine_exchange	amet_e -->	0	1000
EX_amob_e	S-Adenosyl-4-methylthio-2-oxobutanoate_exchange	amob_e -->	0	1000
EX_amp_e	amp exchange	amp_e -->	0	1000
EX_anth_e	Anthranilate exchange	anth_e -->	0	1000
EX_Aphid_Cc_Biomass	EX_Aphid_Cc_Biomass	Aphid_Cc_Biomass_e -->	0	1000
EX_arg_L_e	L-Arginine exchange	arg_L_e -->	0	1000
EX_asn_L_e	L-Asparagine exchange	asn_L_e <=>	-1000	1000
EX_asp_L_e	L-Aspartate exchange	asp_L_e <=>	-1000	1000
EX_BCc_Biomass	EX_BCc_Biomass	BCc_Biomass_e -->	0	1000
EX_btn_e	Biotin exchange	btn_e -->	0	1000
EX_co2_e	CO2 exchange	co2_e <=>	-1000	1000
EX_coa_e	R_Coenzyme_A_exchange	coa_e -->	0	1000
EX_ctp_e	ctp exchange	ctp_e -->	0	1000
EX_cys_L_e	L-Cysteine exchange	cys_L_e -->	0	1000
EX_dad_5_e	5_Deoxyadenosine_exchange	dad_5_e -->	0	1000
EX_datp_e	datp exchange	datp_e -->	0	1000
EX_dctp_e	dctp exchange	dctp_e -->	0	1000
EX_dgtp_e	dgtp exchange	dgtp_e -->	0	1000
EX_dttp_e	dttp exchange	dttp_e -->	0	1000
EX_fad_e	fad exchange	fad_e -->	0	1000
EX_fe2_e	Fe2+ exchange	fe2_e <--	-1000	0
EX_fmn_e	fmn exchange	fmn_e -->	0	1000
EX_for_e	Formate exchange	for_e -->	0	1000
EX_frdp_e	R_Farnesyl_diphosphate_exchange	frdp_e <--	-1000	0
EX_fru_e	D-Fructose exchange	fru_e <--	-1000	0
EX_fum_e	Fumarate exchange	fum_e -->	0	1000
EX_g6p_e	EX_g6p_e	g6p_e <--	-1000	0
EX_gcald_e	Glycolaldehyde exchange	gcald_e -->	0	1000
EX_glc_D_e	D-Glucose exchange	glc_D_e <--	-1000	0
EX_gln_L_e	L-Glutamine exchange	gln_L_e <--	-1000	0
EX_glu_L_e	L-Glutamate exchange	glu_L_e <=>	-100	1000
EX_gly_e	Glycine exchange	gly_e -->	0	1000
EX_glyc_e	Glycerol exchange	glyc_e -->	0	1000
EX_gthrd_e	Reduced glutathione exchange	gthrd_e -->	0	1000
EX_gtp_e	gtp exchange	gtp_e -->	0	1000
EX_h_e	H+ exchange	h_e <=>	-1000	1000
EX_h2o_e	H2O exchange	h2o_e <=>	-1000	1000
EX_h2s_e	H2S_exchange	h2s_e -->	0	1000
EX_hcys_L_e	R_L_Homocysteine_exchange	hcys_L_e -->	0	1000
EX_his_L_e	L-Histidine exchange	his_L_e -->	0	1000
EX_hxan_e	Hypoxanthine exchange	hxan_e <=>	-1000	1000
EX_ile_L_e	L-Isoleucine exchange	ile_L_e -->	0	1000
EX_k_e	K_exchange	k_e <--	-1000	0
EX_leu_L_e	L-Leucine exchange	leu_L_e -->	0	1000
EX_lipopb_e	R_Lipoate_exchange	lipopb_e -->	0	1000
EX_lys_L_e	L-Lysine exchange	lys_L_e -->	0	1000
EX_malcoa_e	R_MalonylCoA_exchange	malcoa_e <--	-1000	0
EX_meoh_e	methanol exchange	meoh_e -->	0	1000
EX_met_L_e	L-Methionine exchange	met_L_e -->	0	1000
EX_nad_e	nad exchange	nad_e -->	0	1000
EX_nadp_e	nadp exchange	nadp_e -->	0	1000
EX_nh4_e	Ammonia exchange	nh4_e <=>	-1000	1000
EX_nicrnt_e	nicrnt_exchange	nicrnt_e <--	-1000	0
EX_o2_e	O2 exchange	o2_e <--	-1000	0
EX_orn_e	R_Ornithine_exchange	orn_e <--	-1000	0
EX_phe_L_e	L-Phenylalanine exchange	phe_L_e -->	0	1000
EX_pheme_e	protoheme exchange	pheme_e -->	0	1000
EX_pi_e	Phosphate exchange	pi_e <=>	-1000	1000
EX_pnto_R_e	(R)-Pantothenate exchange	pnto_R_e <--	-1000	0
EX_ppbng_e	Porphobilinogen exchange	ppbng_e <--	-1000	0
EX_pro_L_e	L-Proline exchange	pro_L_e <--	-1000	0
EX_pydx5p_e	Pyridoxal-5-phosphate exchange	pydx5p_e -->	0	1000
EX_q8_e	R_Ubiquinone_8_exchange	q8_e <--	-1000	0
EX_ribflv_e	riboflavine exchange	ribflv_e -->	0	1000
EX_SCc_Biomass	EX_SCc_Biomass	SCc_Biomass_e -->	0	1000
EX_ser_L_e	L-Serine exchange	ser_L_e <=>	-1000	1000
EX_sheme_e	siroheme exchange	sheme_e -->	0	1000
EX_skm_e	Shikimate_exchange	skm_e -->	0	1000
EX_so4_e	Sulfate exchange	so4_e <--	-1000	0
EX_succ_e	R_Succinate_exchange	succ_e -->	0	1000
EX_thf_e	Tetrahydrofolate_exchange	thf_e -->	0	1000
EX_thm_e	Thiamin exchange	thm_e <--	-1000	0
EX_thmpp_e	Thiamine diphosphate exchange	thmpp_e -->	0	1000
EX_thr_L_e	L-Threonine exchange	thr_L_e -->	0	1000
EX_trp_L_e	L-Tryptophan exchange	trp_L_e -->	0	1000
EX_tyr_L_e	L-Tyrosine exchange	tyr_L_e -->	0	1000
EX_udpglcur_e	UDP_D_glucuronate_exchange	udpglcur_e -->	0	1000
EX_utp_e	utp exchange	utp_e -->	0	1000
EX_val_L_e	L-Valine exchange	val_L_e -->	0	1000
EX_zn2_e	Zinc_exchange	zn2_e <--	-1000	0

## Sheet: Metabolites
ID	Name	Formula	Compartment	Charge
SCc_10fthf_scc	SCc_10fthf	C20H21N7O7	scc	-2
SCc_12dgr_scc	SCc_12dgr	C1836H3448O250	scc	0
SCc_13dpg_scc	SCc_13dpg	C3H4O10P2	scc	-4
SCc_23dhdp_scc	SCc_23dhdp	C7H5NO4	scc	-2
SCc_25drapp_scc	SCc_25drapp	C9H14N5O8P	scc	-2
SCc_26dap_LL_scc	SCc_26dap_LL	C7H14N2O4	scc	0
SCc_26dap_M_scc	SCc_26dap_M	C7H14N2O4	scc	0
SCc_2cpr5p_scc	SCc_2cpr5p	C12H13NO9P	scc	-3
SCc_2me4p_scc	SCc_2me4p	C5H11O7P	scc	-2
SCc_2mecdp_scc	SCc_2mecdp	C5H10O9P2	scc	-2
SCc_2p4c2me_scc	SCc_2p4c2me	C14H22N3O17P3	scc	-4
SCc_2pg_scc	SCc_2pg	C3H4O7P	scc	-3
SCc_3hmrsACP_scc	SCc_3hmrsACP	C25H47N2O9PRS	scc	-1
SCc_3ig3p_scc	SCc_3ig3p	C11H12NO6P	scc	-2
SCc_3pg_scc	SCc_3pg	C3H4O7P	scc	-3
SCc_3psme_scc	SCc_3psme	C10H9O10P	scc	-4
SCc_4abz_scc	SCc_4abz	C7H6NO2	scc	-1
SCc_4adcho_scc	SCc_4adcho	C10H10NO5	scc	-1
SCc_4c2me_scc	SCc_4c2me	C14H23N3O14P2	scc	-2
SCc_4pasp_scc	SCc_4pasp	C4H6NO7P	scc	-2
SCc_4per_scc	SCc_4per	C4H6O8P	scc	-3
SCc_4ppan_scc	SCc_4ppan	C9H15NO8P	scc	-3
SCc_4ppcys_scc	SCc_4ppcys	C12H20N2O9PS	scc	-3
SCc_4r5au_scc	SCc_4r5au	C9H16N4O6	scc	0
SCc_5aprbu_scc	SCc_5aprbu	C9H15N4O9P	scc	-2
SCc_5apru_scc	SCc_5apru	C9H13N4O9P	scc	-2
SCc_6hmhpt_scc	SCc_6hmhpt	C7H9N5O2	scc	0
SCc_6hmhptpp_scc	SCc_6hmhptpp	C7H8N5O8P2	scc	-3
SCc_6pgc_scc	SCc_6pgc	C6H10O10P	scc	-3
SCc_6pgl_scc	SCc_6pgl	C6H9O9P	scc	-2
SCc_8aonn_scc	SCc_8aonn	C9H17NO3	scc	0
SCc_ACP_scc	SCc_ACP	C11H21N2O7PRS	scc	-1
SCc_acACP_scc	SCc_acACP	C13H23N2O8PRS	scc	-1
SCc_ac_scc	SCc_ac	C2H3O2	scc	-1
SCc_accoa_scc	SCc_accoa	C23H34N7O17P3S	scc	-4
SCc_acgam1p_scc	SCc_acgam1p	C8H14NO9P	scc	-2
SCc_acser_scc	SCc_acser	C5H9NO4	scc	0
SCc_actACP_scc	SCc_actACP	C15H25N2O9PRS	scc	-1
SCc_actp_scc	SCc_actp	C2H3O5P	scc	-2
SCc_adp_scc	SCc_adp	C10H12N5O10P2	scc	-3
SCc_adphep_DD_scc	SCc_adphep_DD	C17H25N5O16P2	scc	-2
SCc_adphep_LD_scc	SCc_adphep_LD	C17H25N5O16P2	scc	-2
SCc_ahcys_scc	SCc_ahcys	C14H20N6O5S	scc	0
SCc_ahdt_scc	SCc_ahdt	C9H12N5O13P3	scc	-4
SCc_air_scc	SCc_air	C8H12N3O7P	scc	-2
SCc_4ampm_scc	SCc_4ampm	C6H8N3O4P	scc	-2
SCc_akg_scc	SCc_akg	C5H4O5	scc	-2
SCc_ala_D_scc	SCc_ala_D	C3H7NO2	scc	0
SCc_ala_L_scc	SCc_ala_L	C3H7NO2	scc	0
SCc_alaala_scc	SCc_alaala	C6H12N2O3	scc	0
SCc_amet_scc	SCc_amet	C15H23N6O5S	scc	1
SCc_amob_scc	SCc_amob	C15H19N5O6S	scc	0
SCc_amp_scc	SCc_amp	C10H12N5O7P	scc	-2
SCc_anth_scc	SCc_anth	C7H6NO2	scc	-1
SCc_aps_scc	SCc_aps	C10H12N5O10PS	scc	-2
SCc_ara5p_scc	SCc_ara5p	C5H9O8P	scc	-2
SCc_arg_L_scc	SCc_arg_L	C6H15N4O2	scc	1
SCc_asn_L_scc	SCc_asn_L	C4H8N2O3	scc	0
SCc_asp_L_scc	SCc_asp_L	C4H6NO4	scc	-1
SCc_aspsa_scc	SCc_aspsa	C4H7NO3	scc	0
SCc_atp_scc	SCc_atp	C10H12N5O13P3	scc	-4
SCc_btn_scc	SCc_btn	C10H15N2O3S	scc	-1
SCc_cbasp_scc	SCc_cbasp	C5H6N2O5	scc	-2
SCc_cbp_scc	SCc_cbp	CH2NO5P	scc	-2
SCc_cdp_scc	SCc_cdp	C9H12N3O11P2	scc	-3
SCc_cdpdag_scc	SCc_cdpdag	C2286H3998N150O750P100	scc	-100
SCc_cdpea_scc	SCc_cdpea	C11H19N4O11P2	scc	-1
SCc_chor_scc	SCc_chor	C10H8O6	scc	-2
SCc_ckdo_scc	SCc_ckdo	C17H24N3O15P	scc	-2
SCc_clpn_scc	SCc_clpn	C3822H7096O850P100	scc	-100
SCc_cmp_scc	SCc_cmp	C9H12N3O8P	scc	-2
SCc_co2_scc	SCc_co2	CO2	scc	0
SCc_coa_scc	SCc_coa	C21H32N7O16P3S	scc	-4
SCc_cpppg3_scc	SCc_cpppg3	C36H40N4O8	scc	-4
SCc_ctp_scc	SCc_ctp	C9H12N3O14P3	scc	-4
SCc_cys_L_scc	SCc_cys_L	C3H7NO2S	scc	0
SCc_dad_5_scc	SCc_dad_5	C10H13N5O3	scc	0
SCc_dadp_scc	SCc_dadp	C10H12N5O9P2	scc	-3
SCc_dann_scc	SCc_dann	C9H21N2O2	scc	1
SCc_datp_scc	SCc_datp	C10H12N5O12P3	scc	-4
SCc_db4p_scc	SCc_db4p	C4H7O6P	scc	-2
SCc_dcamp_scc	SCc_dcamp	C14H14N5O11P	scc	-4
SCc_dcdp_scc	SCc_dcdp	C9H12N3O10P2	scc	-3
SCc_dctp_scc	SCc_dctp	C9H12N3O13P3	scc	-4
SCc_ddcaACP_scc	SCc_ddcaACP	C23H43N2O8PRS	scc	-1
SCc_dgdp_scc	SCc_dgdp	C10H12N5O10P2	scc	-3
SCc_dgtp_scc	SCc_dgtp	C10H12N5O13P3	scc	-4
SCc_dhap_scc	SCc_dhap	C3H5O6P	scc	-2
SCc_dhf_scc	SCc_dhf	C19H19N7O6	scc	-2
SCc_dhnpt_scc	SCc_dhnpt	C9H13N5O4	scc	0
SCc_dhor_S_scc	SCc_dhor_S	C5H5N2O4	scc	-1
SCc_dhpmp_scc	SCc_dhpmp	C9H12N5O7P	scc	-2
SCc_dhpt_scc	SCc_dhpt	C14H13N6O3	scc	-1
SCc_dmlz_scc	SCc_dmlz	C13H18N4O6	scc	0
SCc_dmpp_scc	SCc_dmpp	C5H9O7P2	scc	-3
SCc_dnad_scc	SCc_dnad	C21H24N6O15P2	scc	-2
SCc_dpcoa_scc	SCc_dpcoa	C21H33N7O13P2S	scc	-2
SCc_dscl_scc	SCc_dscl	C42H41N4O16	scc	-7
SCc_dtbt_scc	SCc_dtbt	C10H17N2O3	scc	-1
SCc_dtdp_scc	SCc_dtdp	C10H13N2O11P2	scc	-3
SCc_dtmp_scc	SCc_dtmp	C10H13N2O8P	scc	-2
SCc_dttp_scc	SCc_dttp	C10H13N2O14P3	scc	-4
SCc_dudp_scc	SCc_dudp	C9H11N2O11P2	scc	-3
SCc_dump_scc	SCc_dump	C9H11N2O8P	scc	-2
SCc_dxyl5p_scc	SCc_dxyl5p	C5H9O7P	scc	-2
SCc_e4p_scc	SCc_e4p	C4H7O7P	scc	-2
SCc_f1p_scc	SCc_f1p	C6H11O9P	scc	-2
SCc_f6p_scc	SCc_f6p	C6H11O9P	scc	-2
SCc_fad_scc	SCc_fad	C27H31N9O15P2	scc	-2
SCc_fdp_scc	SCc_fdp	C6H10O12P2	scc	-4
SCc_fe2_scc	SCc_fe2	Fe	scc	2
SCc_fgam_scc	SCc_fgam	C8H13N2O9P	scc	-2
SCc_fmn_scc	SCc_fmn	C17H19N4O9P	scc	-2
SCc_for_scc	SCc_for	CH1O2	scc	-1
SCc_fpram_scc	SCc_fpram	C8H15N3O8P	scc	-1
SCc_frdp_scc	SCc_frdp	C15H25O7P2	scc	-3
SCc_fum_scc	SCc_fum	C4H2O4	scc	-2
SCc_g1p_scc	SCc_g1p	C6H11O9P	scc	-2
SCc_g3p_scc	SCc_g3p	C3H5O6P	scc	-2
SCc_g6p_scc	SCc_g6p	C6H11O9P	scc	-2
SCc_gam1p_scc	SCc_gam1p	C6H13NO8P	scc	-1
SCc_gam6p_scc	SCc_gam6p	C6H13NO8P	scc	-1
SCc_gar_scc	SCc_gar	C7H14N2O8P	scc	-1
SCc_gcald_scc	SCc_gcald	C2H4O2	scc	0
SCc_gdp_scc	SCc_gdp	C10H12N5O11P2	scc	-3
SCc_gln_L_scc	SCc_gln_L	C5H10N2O3	scc	0
SCc_glu_D_scc	SCc_glu_D	C5H8NO4	scc	-1
SCc_glu_L_scc	SCc_glu_L	C5H8NO4	scc	-1
SCc_glucys_scc	SCc_glucys	C8H13N2O5S	scc	-1
SCc_gly_scc	SCc_gly	C2H5NO2	scc	0
SCc_glyc3p_scc	SCc_glyc3p	C3H7O6P	scc	-2
SCc_glyc_scc	SCc_glyc	C3H8O3	scc	0
SCc_gmhep17bp_scc	SCc_gmhep17bp	C7H12O13P2	scc	-4
SCc_gmhep1p_scc	SCc_gmhep1p	C7H13O10P	scc	-2
SCc_gmhep7p_scc	SCc_gmhep7p	C7H13O10P	scc	-2
SCc_gmp_scc	SCc_gmp	C10H12N5O8P	scc	-2
SCc_grdp_scc	SCc_grdp	C10H17O7P2	scc	-3
SCc_gthrd_scc	SCc_gthrd	C10H16N3O6S	scc	-1
SCc_gtp_scc	SCc_gtp	C10H12N5O14P3	scc	-4
SCc_h2mb4p_scc	SCc_h2mb4p	C5H9O8P2	scc	-3
SCc_h2o_scc	SCc_h2o	H2O	scc	0
SCc_h2s_scc	SCc_h2s	H2S	scc	0
SCc_h_scc	SCc_h	H	scc	1
SCc_hco3_scc	SCc_hco3	CHO3	scc	-1
SCc_hdeACP_scc	SCc_hdeACP	C27H49N2O8PRS	scc	-1
SCc_hemeO_scc	SCc_hemeO	C49H56FeN4O5	scc	-2
SCc_his_L_scc	SCc_his_L	C6H9N3O2	scc	0
SCc_hmbil_scc	SCc_hmbil	C40H38N4O17	scc	-8
SCc_hxan_scc	SCc_hxan	C5H4N4O	scc	0
SCc_ile_L_scc	SCc_ile_L	C6H13NO2	scc	0
SCc_imp_scc	SCc_imp	C10H11N4O8P	scc	-2
SCc_indole_scc	SCc_indole	C8H7N	scc	0
SCc_ipdp_scc	SCc_ipdp	C5H9O7P2	scc	-3
SCc_kdo2lipid4L_scc	SCc_kdo2lipid4L	C96H170N2O38P2	scc	-6
SCc_kdo2lipid4_scc	SCc_kdo2lipid4	C84H148N2O37P2	scc	-6
SCc_kdo8p_scc	SCc_kdo8p	C8H12O11P	scc	-3
SCc_kdo_scc	SCc_kdo	C8H13O8	scc	-1
SCc_kdolipid4_scc	SCc_kdolipid4	C76H137N2O30P2	scc	-5
SCc_leu_L_scc	SCc_leu_L	C6H13NO2	scc	0
SCc_lipa_scc	SCc_lipa	C110H196N2O39P2	scc	-6
SCc_lipidA_scc	SCc_lipidA	C68H126N2O23P2	scc	-4
SCc_lipidAds_scc	SCc_lipidAds	C68H127N2O20P	scc	-2
SCc_lipidX_scc	SCc_lipidX	C34H64NO12P	scc	-2
SCc_lps_scc	SCc_lps	C171H297N4O88P2	scc	-7
SCc_lys_L_scc	SCc_lys_L	C6H15N2O2	scc	1
SCc_malACP_scc	SCc_malACP	C14H22N2O10PRS	scc	-2
SCc_malcoa_scc	SCc_malcoa	C24H33N7O19P3S	scc	-5
SCc_met_L_scc	SCc_met_L	C5H11NO2S	scc	0
SCc_methf_scc	SCc_methf	C20H20N7O6	scc	-1
SCc_mlthf_scc	SCc_mlthf	C20H21N7O6	scc	-2
SCc_q8h2_scc	SCc_q8h2	C49H76O4	scc	0
SCc_q8_scc	SCc_q8	C49H74O4	scc	0
SCc_myrsACP_scc	SCc_myrsACP	C25H47N2O8PRS	scc	-1
SCc_nad_scc	SCc_nad	C21H26N7O14P2	scc	-1
SCc_nadh_scc	SCc_nadh	C21H27N7O14P2	scc	-2
SCc_nadp_scc	SCc_nadp	C21H25N7O17P3	scc	-3
SCc_nadph_scc	SCc_nadph	C21H26N7O17P3	scc	-4
SCc_nh4_scc	SCc_nh4	H4N	scc	1
SCc_nicrnt_scc	SCc_nicrnt	C11H12NO9P	scc	-2
SCc_o2_scc	SCc_o2	O2	scc	0
SCc_octeACP_scc	SCc_octeACP	C29H53N2O8PRS	scc	-1
SCc_ohpb_scc	SCc_ohpb	C4H4O8P	scc	-3
SCc_orot5p_scc	SCc_orot5p	C10H10N2O11P	scc	-3
SCc_orot_scc	SCc_orot	C5H3N2O4	scc	-1
SCc_pa_scc	SCc_pa	C1836H3398O400P50	scc	-100
SCc_palmACP_scc	SCc_palmACP	C27H51N2O8PRS	scc	-1
SCc_pan4p_scc	SCc_pan4p	C11H21N2O7PS	scc	-2
SCc_pap_scc	SCc_pap	C10H11N5O10P2	scc	-4
SCc_paps_scc	SCc_paps	C10H11N5O13P2S	scc	-4
SCc_pdx5p_scc	SCc_pdx5p	C8H10NO6P	scc	-2
SCc_pe_scc	SCc_pe	C1936H3748N50O400P50	scc	0
SCc_pep_scc	SCc_pep	C3H2O6P	scc	-3
SCc_peptido_scc	SCc_peptido	C40H62N8O21	scc	-2
SCc_pg_scc	SCc_pg	C1986H3748O500P50	scc	-50
SCc_pgp_scc	SCc_pgp	C1986H3698O650P100	scc	-150
SCc_phe_L_scc	SCc_phe_L	C9H11NO2	scc	0
SCc_pheme_scc	SCc_pheme	C34H30FeN4O4	scc	-2
SCc_phthr_scc	SCc_phthr	C4H8NO7P	scc	-2
SCc_pi_scc	SCc_pi	HO4P	scc	-2
SCc_pnto_R_scc	SCc_pnto_R	C9H16NO5	scc	-1
SCc_ppbng_scc	SCc_ppbng	C10H13N2O4	scc	-1
SCc_ppi_scc	SCc_ppi	HO7P2	scc	-3
SCc_ppp9_scc	SCc_ppp9	C34H32N4O4	scc	-2
SCc_pppg9_scc	SCc_pppg9	C34H38N4O4	scc	-2
SCc_pram_scc	SCc_pram	C5H11NO7P	scc	-1
SCc_pran_scc	SCc_pran	C12H13NO9P	scc	-3
SCc_pro_L_scc	SCc_pro_L	C5H9NO2	scc	0
SCc_prpp_scc	SCc_prpp	C5H8O14P3	scc	-5
SCc_ps_scc	SCc_ps	C1986H3698N50O500P50	scc	-50
SCc_pydx5p_scc	SCc_pydx5p	C8H8NO6P	scc	-2
SCc_pyr_scc	SCc_pyr	C3H3O3	scc	-1
SCc_r5p_scc	SCc_r5p	C5H9O8P	scc	-2
SCc_ribflv_scc	SCc_ribflv	C17H20N4O6	scc	0
SCc_ru5p_D_scc	SCc_ru5p_D	C5H9O8P	scc	-2
SCc_s7p_scc	SCc_s7p	C7H13O10P	scc	-2
SCc_scl_scc	SCc_scl	C42H39N4O16	scc	-7
SCc_ser_L_scc	SCc_ser_L	C3H7NO3	scc	0
SCc_sheme_scc	SCc_sheme	C42H36FeN4O16	scc	-8
SCc_skm_scc	SCc_skm	C7H9O5	scc	-1
SCc_skm5p_scc	SCc_skm5p	C7H8O8P	scc	-3
SCc_sl26da_scc	SCc_sl26da	C11H16N2O7	scc	-2
SCc_sl2a6o_scc	SCc_sl2a6o	C11H12NO8	scc	-3
SCc_so3_scc	SCc_so3	O3S	scc	-2
SCc_so4_scc	SCc_so4	O4S	scc	-2
SCc_succ_scc	SCc_succ	C4H4O4	scc	-2
SCc_succoa_scc	SCc_succoa	C25H35N7O19P3S	scc	-5
SCc_tdeACP_scc	SCc_tdeACP	C25H45N2O8PRS	scc	-1
SCc_thdp_scc	SCc_thdp	C7H7NO4	scc	-2
SCc_thf_scc	SCc_thf	C19H21N7O6	scc	-2
SCc_thm_scc	SCc_thm	C12H17N4OS	scc	1
SCc_thmmp_scc	SCc_thmmp	C12H16N4O4PS	scc	-1
SCc_thmpp_scc	SCc_thmpp	C12H16N4O7P2S	scc	-2
SCc_thr_L_scc	SCc_thr_L	C4H9NO3	scc	0
SCc_trdox_scc	SCc_trdox	X	scc	0
SCc_trdrd_scc	SCc_trdrd	XH2	scc	0
SCc_trp_L_scc	SCc_trp_L	C11H12N2O2	scc	0
SCc_tyr_L_scc	SCc_tyr_L	C9H11NO3	scc	0
SCc_u23ga_scc	SCc_u23ga	C43H75N3O20P2	scc	-2
SCc_u3aga_scc	SCc_u3aga	C31H51N3O19P2	scc	-2
SCc_u3hga_scc	SCc_u3hga	C29H50N3O18P2	scc	-1
SCc_uaagmda_scc	SCc_uaagmda	C95H152N8O28P2	scc	-4
SCc_uaccg_scc	SCc_uaccg	C20H26N3O19P2	scc	-3
SCc_uacgam_scc	SCc_uacgam	C17H25N3O17P2	scc	-2
SCc_uagmda_scc	SCc_uagmda	C87H139N7O23P2	scc	-4
SCc_uama_scc	SCc_uama	C23H33N4O20P2	scc	-3
SCc_uamag_scc	SCc_uamag	C28H39N5O23P2	scc	-4
SCc_uamr_scc	SCc_uamr	C20H28N3O19P2	scc	-3
SCc_udcpdp_scc	SCc_udcpdp	C55H89O7P2	scc	-3
SCc_udcpp_scc	SCc_udcpp	C55H89O4P	scc	-2
SCc_udp_scc	SCc_udp	C9H11N2O12P2	scc	-3
SCc_udpg_scc	SCc_udpg	C15H22N2O17P2	scc	-2
SCc_udpglcur_scc	SCc_udpglcur	C15H19N2O18P2	scc	-3
SCc_ugmd_scc	SCc_ugmd	C35H51N7O26P2	scc	-4
SCc_ugmda_scc	SCc_ugmda	C41H61N9O28P2	scc	-4
SCc_ump_scc	SCc_ump	C9H11N2O9P	scc	-2
SCc_uppg3_scc	SCc_uppg3	C40H36N4O16	scc	-8
SCc_utp_scc	SCc_utp	C9H11N2O15P3	scc	-4
SCc_val_L_scc	SCc_val_L	C5H11NO2	scc	0
SCc_xmp_scc	SCc_xmp	C10H11N4O9P	scc	-2
SCc_xu5p_D_scc	SCc_xu5p_D	C5H9O8P	scc	-2
SCc_dutp_scc	SCc_dutp	C9H11N2O14P3	scc	-4
SCc_zn2_scc	SCc_zn2	Zn	scc	2
SCc_k_scc	SCc_k	K	scc	1
SCc_pppi_scc	SCc_pppi	HO10P3	scc	-4
BCc_10fthf_bcc	BCc_10fthf	C20H21N7O7	bcc	-2
BCc_13dpg_bcc	BCc_13dpg	C3H4O10P2	bcc	-4
BCc_23dhdp_bcc	BCc_23dhdp	C7H5NO4	bcc	-2
BCc_23dhmb_bcc	BCc_23dhmb	C5H9O4	bcc	-1
BCc_23dhmp_bcc	BCc_23dhmp	C6H11O4	bcc	-1
BCc_26dap_LL_bcc	BCc_26dap_LL	C7H14N2O4	bcc	0
BCc_26dap_M_bcc	BCc_26dap_M	C7H14N2O4	bcc	0
BCc_2ahbut_bcc	BCc_2ahbut	C6H9O4	bcc	-1
BCc_2dda7p_bcc	BCc_2dda7p	C7H10O10P	bcc	-3
BCc_2ippm_bcc	BCc_2ippm	C7H8O4	bcc	-2
BCc_2obut_bcc	BCc_2obut	C4H5O3	bcc	-1
BCc_2pg_bcc	BCc_2pg	C3H4O7P	bcc	-3
BCc_3c2hmp_bcc	BCc_3c2hmp	C7H10O5	bcc	-2
BCc_3c3hmp_bcc	BCc_3c3hmp	C7H10O5	bcc	-2
BCc_3c4mop_bcc	BCc_3c4mop	C7H8O5	bcc	-2
BCc_3dhq_bcc	BCc_3dhq	C7H9O6	bcc	-1
BCc_3dhsk_bcc	BCc_3dhsk	C7H7O5	bcc	-1
BCc_3mob_bcc	BCc_3mob	C5H7O3	bcc	-1
BCc_3mop_bcc	BCc_3mop	C6H9O3	bcc	-1
BCc_3pg_bcc	BCc_3pg	C3H4O7P	bcc	-3
BCc_3psme_bcc	BCc_3psme	C10H9O10P	bcc	-4
BCc_4mop_bcc	BCc_4mop	C6H9O3	bcc	-1
BCc_4pasp_bcc	BCc_4pasp	C4H6NO7P	bcc	-2
BCc_5mthf_bcc	BCc_5mthf	C20H24N7O6	bcc	-1
BCc_6pgc_bcc	BCc_6pgc	C6H10O10P	bcc	-3
BCc_6pgl_bcc	BCc_6pgl	C6H9O9P	bcc	-2
BCc_ACP_bcc	BCc_ACP	C11H21N2O7PRS	bcc	-1
BCc_acACP_bcc	BCc_acACP	C13H23N2O8PRS	bcc	-1
BCc_ac_bcc	BCc_ac	C2H3O2	bcc	-1
BCc_accoa_bcc	BCc_accoa	C23H34N7O17P3S	bcc	-4
BCc_actACP_bcc	BCc_actACP	C15H25N2O9PRS	bcc	-1
BCc_actp_bcc	BCc_actp	C2H3O5P	bcc	-2
BCc_adp_bcc	BCc_adp	C10H12N5O10P2	bcc	-3
BCc_aicar_bcc	BCc_aicar	C9H13N4O8P	bcc	-2
BCc_akg_bcc	BCc_akg	C5H4O5	bcc	-2
BCc_ala_L_bcc	BCc_ala_L	C3H7NO2	bcc	0
BCc_alac_S_bcc	BCc_alac_S	C5H7O4	bcc	-1
BCc_amet_bcc	BCc_amet	C15H23N6O5S	bcc	1
BCc_amp_bcc	BCc_amp	C10H12N5O7P	bcc	-2
BCc_anth_bcc	BCc_anth	C7H6NO2	bcc	-1
BCc_arg_L_bcc	BCc_arg_L	C6H15N4O2	bcc	1
BCc_argsuc_bcc	BCc_argsuc	C10H17N4O6	bcc	-1
BCc_asn_L_bcc	BCc_asn_L	C4H8N2O3	bcc	0
BCc_asp_L_bcc	BCc_asp_L	C4H6NO4	bcc	-1
BCc_aspsa_bcc	BCc_aspsa	C4H7NO3	bcc	0
BCc_atp_bcc	BCc_atp	C10H12N5O13P3	bcc	-4
BCc_btn_bcc	BCc_btn	C10H15N2O3S	bcc	-1
BCc_cbp_bcc	BCc_cbp	CH2NO5P	bcc	-2
BCc_chor_bcc	BCc_chor	C10H8O6	bcc	-2
BCc_citr_L_bcc	BCc_citr_L	C6H13N3O3	bcc	0
BCc_co2_bcc	BCc_co2	CO2	bcc	0
BCc_coa_bcc	BCc_coa	C21H32N7O16P3S	bcc	-4
BCc_ctp_bcc	BCc_ctp	C9H12N3O14P3	bcc	-4
BCc_cys_L_bcc	BCc_cys_L	C3H7NO2S	bcc	0
BCc_dad_5_bcc	BCc_dad_5	C10H13N5O3	bcc	0
BCc_datp_bcc	BCc_datp	C10H12N5O12P3	bcc	-4
BCc_dctp_bcc	BCc_dctp	C9H12N3O13P3	bcc	-4
BCc_dgtp_bcc	BCc_dgtp	C10H12N5O13P3	bcc	-4
BCc_dhap_bcc	BCc_dhap	C3H5O6P	bcc	-2
BCc_dttp_bcc	BCc_dttp	C10H13N2O14P3	bcc	-4
BCc_e4p_bcc	BCc_e4p	C4H7O7P	bcc	-2
BCc_eig3p_bcc	BCc_eig3p	C6H9N2O6P	bcc	-2
BCc_f6p_bcc	BCc_f6p	C6H11O9P	bcc	-2
BCc_fad_bcc	BCc_fad	C27H31N9O15P2	bcc	-2
BCc_fdp_bcc	BCc_fdp	C6H10O12P2	bcc	-4
BCc_frdp_bcc	BCc_frdp	C15H25O7P2	bcc	-3
BCc_fum_bcc	BCc_fum	C4H2O4	bcc	-2
BCc_g3p_bcc	BCc_g3p	C3H5O6P	bcc	-2
BCc_g6p_bcc	BCc_g6p	C6H11O9P	bcc	-2
BCc_gln_L_bcc	BCc_gln_L	C5H10N2O3	bcc	0
BCc_glu_L_bcc	BCc_glu_L	C5H8NO4	bcc	-1
BCc_gly_bcc	BCc_gly	C2H5NO2	bcc	0
BCc_gtp_bcc	BCc_gtp	C10H12N5O14P3	bcc	-4
BCc_h2o_bcc	BCc_h2o	H2O	bcc	0
BCc_h_bcc	BCc_h	H	bcc	1
BCc_hco3_bcc	BCc_hco3	CHO3	bcc	-1
BCc_hcys_L_bcc	BCc_hcys_L	C4H9NO2S	bcc	0
BCc_hemeO_bcc	BCc_hemeO	C49H56FeN4O5	bcc	-2
BCc_his_L_bcc	BCc_his_L	C6H9N3O2	bcc	0
BCc_hisp_bcc	BCc_hisp	C6H11N3O4P	bcc	-1
BCc_histd_bcc	BCc_histd	C6H12N3O	bcc	1
BCc_hom_L_bcc	BCc_hom_L	C4H9NO3	bcc	0
BCc_ile_L_bcc	BCc_ile_L	C6H13NO2	bcc	0
BCc_imacp_bcc	BCc_imacp	C6H7N2O5P	bcc	-2
BCc_leu_L_bcc	BCc_leu_L	C6H13NO2	bcc	0
BCc_lipopb_bcc	BCc_lipopb	C8H13OS2	bcc	0
BCc_lys_L_bcc	BCc_lys_L	C6H15N2O2	bcc	1
BCc_malACP_bcc	BCc_malACP	C14H22N2O10PRS	bcc	-2
BCc_malcoa_bcc	BCc_malcoa	C24H33N7O19P3S	bcc	-5
BCc_met_L_bcc	BCc_met_L	C5H11NO2S	bcc	0
BCc_methf_bcc	BCc_methf	C20H20N7O6	bcc	-1
BCc_mlthf_bcc	BCc_mlthf	C20H21N7O6	bcc	-2
BCc_nad_bcc	BCc_nad	C21H26N7O14P2	bcc	-1
BCc_nadh_bcc	BCc_nadh	C21H27N7O14P2	bcc	-2
BCc_nadp_bcc	BCc_nadp	C21H25N7O17P3	bcc	-3
BCc_nadph_bcc	BCc_nadph	C21H26N7O17P3	bcc	-4
BCc_nh4_bcc	BCc_nh4	H4N	bcc	1
BCc_o2_bcc	BCc_o2	O2	bcc	0
BCc_ocdca_bcc	BCc_ocdca	C18H35O2	bcc	-1
BCc_octa_bcc	BCc_octa	C8H15O2	bcc	-1
BCc_octapb_bcc	BCc_octapb	C8H15O	bcc	1
BCc_orn_bcc	BCc_orn	C5H13N2O2	bcc	1
BCc_palm_bcc	BCc_palm	C16H31O2	bcc	-1
BCc_pep_bcc	BCc_pep	C3H2O6P	bcc	-3
BCc_phe_L_bcc	BCc_phe_L	C9H11NO2	bcc	0
BCc_pheme_bcc	BCc_pheme	C34H30FeN4O4	bcc	-2
BCc_phom_bcc	BCc_phom	C4H8NO6P	bcc	-2
BCc_phpyr_bcc	BCc_phpyr	C9H7O3	bcc	-1
BCc_pi_bcc	BCc_pi	HO4P	bcc	-2
BCc_pphn_bcc	BCc_pphn	C10H8O6	bcc	-2
BCc_ppi_bcc	BCc_ppi	HO7P2	bcc	-3
BCc_prbamp_bcc	BCc_prbamp	C15H19N5O14P2	bcc	-4
BCc_prbatp_bcc	BCc_prbatp	C15H19N5O20P4	bcc	-6
BCc_prfp_bcc	BCc_prfp	C15H21N5O15P2	bcc	-4
BCc_prlp_bcc	BCc_prlp	C15H21N5O15P2	bcc	-4
BCc_pro_L_bcc	BCc_pro_L	C5H9NO2	bcc	0
BCc_prpp_bcc	BCc_prpp	C5H8O14P3	bcc	-5
BCc_pydx5p_bcc	BCc_pydx5p	C8H8NO6P	bcc	-2
BCc_pyr_bcc	BCc_pyr	C3H3O3	bcc	-1
BCc_q8_bcc	BCc_q8	C49H74O4	bcc	0
BCc_q8h2_bcc	BCc_q8h2	C49H76O4	bcc	0
BCc_r5p_bcc	BCc_r5p	C5H9O8P	bcc	-2
BCc_ribflv_bcc	BCc_ribflv	C17H20N4O6	bcc	0
BCc_ru5p_D_bcc	BCc_ru5p_D	C5H9O8P	bcc	-2
BCc_h2s_bcc	BCc_h2s	H2S	bcc	0
BCc_s7p_bcc	BCc_s7p	C7H13O10P	bcc	-2
BCc_ser_L_bcc	BCc_ser_L	C3H7NO3	bcc	0
BCc_skm5p_bcc	BCc_skm5p	C7H8O8P	bcc	-3
BCc_skm_bcc	BCc_skm	C7H9O5	bcc	-1
BCc_sl26da_bcc	BCc_sl26da	C11H16N2O7	bcc	-2
BCc_sl2a6o_bcc	BCc_sl2a6o	C11H12NO8	bcc	-3
BCc_succ_bcc	BCc_succ	C4H4O4	bcc	-2
BCc_succoa_bcc	BCc_succoa	C25H35N7O19P3S	bcc	-5
BCc_thdp_bcc	BCc_thdp	C7H7NO4	bcc	-2
BCc_thf_bcc	BCc_thf	C19H21N7O6	bcc	-2
BCc_thmpp_bcc	BCc_thmpp	C12H16N4O7P2S	bcc	-2
BCc_thr_L_bcc	BCc_thr_L	C4H9NO3	bcc	0
BCc_trp_L_bcc	BCc_trp_L	C11H12N2O2	bcc	0
BCc_tyr_L_bcc	BCc_tyr_L	C9H11NO3	bcc	0
BCc_utp_bcc	BCc_utp	C9H11N2O15P3	bcc	-4
BCc_val_L_bcc	BCc_val_L	C5H11NO2	bcc	0
BCc_xu5p_D_bcc	BCc_xu5p_D	C5H9O8P	bcc	-2
BCc_8aonn_bcc	BCc_8aonn	8-Amino-7-oxononanoate	bcc	0
BCc_pmeACP_bcc	BCc_pmeACP	Pimeloyl-[acyl-carrier protein] methyl ester	bcc	0
BCc_pimACP_bcc	BCc_pimACP	Pimeloyl-[acyl-carrier protein]	bcc	0
BCc_epmeACP_bcc	BCc_epmeACP	Enoylpimeloyl-[acyl-carrier protein] methyl ester	bcc	0
BCc_hpmeACP_bcc	BCc_hpmeACP	3-Hydroxypimeloyl-[acyl-carrier protein] methyl ester	bcc	0
BCc_opmeACP_bcc	BCc_opmeACP	3-Oxo-pimeloyl-[acyl-carrier protein] methyl ester	bcc	0
BCc_egmeACP_bcc	BCc_egmeACP	Enoylglutaryl-[acyl-carrier protein] methyl ester	bcc	0
BCc_hgmeACP_bcc	BCc_hgmeACP	3-Hydroxyglutaryl-[acyl-carrier protein] methyl ester	bcc	0
BCc_ogmeACP_bcc	BCc_ogmeACP	3-Oxo-glutaryl-[acyl-carrier protein] methyl ester	bcc	0
BCc_malcoame_bcc	BCc_malcoame	malonyl-CoA methyl ester	bcc	0
BCc_meoh_bcc	BCc_meoh	Methanol	bcc	0
BCc_ahcys_bcc	BCc_ahcys	S-Adenosyl-L-homocysteine	bcc	0
BCc_gmeACP_bcc	BCc_gmeACP	Glutaryl-[acyl-carrier protein] methyl ester	bcc	0
4ampm_e	4ampm_e	C6H8N3O4P	e	-2	-2
4pasp_e	4pasp_e	C4H6NO7P	e	-2	0
8aonn_e	8aonn_e	C9H17NO3	e	0	-4
ac_e	ac_e	C2H3O2	e	-1	0
ahcys_e	ahcys_e	C14H20N6O5S	e	0	-5
aicar_e	aicar_e	C9H13N4O8P	e	-2	1
akg_e	akg_e	C5H4O5	e	-2	0
ala_D_e	ala_D_e	C3H7NO2	e	0	-2
ala_L_e	ala_L_e	C3H7NO2	e	0
amet_e	amet_e	C15H23N6O5S	e	1	0
amob_e	amob_e	C15H19N5O6S	e	0	-2
amp_e	amp_e	C10H12N5O7P	e	-2	0
anth_e	anth_e	C7H6NO2	e	-1	-1
arg_L_e	arg_L_e	C6H15N4O2	e	1	0
asn_L_e	asn_L_e	C4H8N2O3	e	0	-2
asp_L_e	asp_L_e	C4H6NO4	e	-1	-2
btn_e	btn_e	C10H15N2O3S	e	-1	0
co2_e	co2_e	CO2	e	0	0
coa_e	coa_e	C21H32N7O16P3S	e	-4	1
ctp_e	ctp_e	C9H12N3O14P3	e	-4	0
cys_L_e	cys_L_e	C3H7NO2S	e	0	-2
dad_5_e	dad_5_e	C10H13N5O3	e	0	-1
datp_e	datp_e	C10H12N5O12P3	e	-4	1
dctp_e	dctp_e	C9H12N3O13P3	e	-4	0
dgtp_e	dgtp_e	C10H12N5O13P3	e	-4	-1
dttp_e	dttp_e	C10H13N2O14P3	e	-4	-1
fad_e	fad_e	C27H31N9O15P2	e	-2	0
fe2_e	fe2_e	Fe	e	2	-4
fmn_e	fmn_e	C17H19N4O9P	e	-2	0
for_e	for_e	CH1O2	e	-1	0
frdp_e	frdp_e	C15H25O7P2	e	-3	-4
fru_e	fru_e	C6H12O6	e	0	-4
fum_e	fum_e	C4H2O4	e	-2	-4
g6p_e	g6p_e	C6H11O9P	e	-2	-4
gcald_e	gcald_e	C2H4O2	e	0	-2
glc_D_e	glc_D_e	C6H12O6	e	0	2
gln_L_e	gln_L_e	C5H10N2O3	e	0	-2
glu_L_e	glu_L_e	C5H8NO4	e	-1	-1
gly_e	gly_e	C2H5NO2	e	0	0
glyc_e	glyc_e	C3H8O3	e	0	-2
gthrd_e	gthrd_e	C10H16N3O6S	e	-1	0
gtp_e	gtp_e	C10H12N5O14P3	e	-4	0
h2o_e	h2o_e	H2O	e	0	0
h2s_e	h2s_e	H2S	e	0	-1
h_e	h_e	H	e	1	0
hcys_L_e	hcys_L_e	C4H9NO2S	e	0	0
his_L_e	his_L_e	C6H9N3O2	e	0	-1
hxan_e	hxan_e	C5H4N4O	e	0	-4
ile_L_e	ile_L_e	C6H13NO2	e	0	0
k_e	k_e	K	e	1	0
kdo2lipid4L_e	kdo2lipid4L_e	C96H170N2O38P2	e	-6	1
leu_L_e	leu_L_e	C6H13NO2	e	0	0
lipopb_e	lipopb_e	C8H13OS2	e	0	0
lys_L_e	lys_L_e	C6H15N2O2	e	1	0
malcoa_e	malcoa_e	C24H33N7O19P3S	e	-5	-6
meoh_e	meoh_e	CH4O1	e	None	0
met_L_e	met_L_e	C5H11NO2S	e	0	1
nad_e	nad_e	C21H26N7O14P2	e	-1	0
nadp_e	nadp_e	C21H25N7O17P3	e	-3	-1
nh4_e	nh4_e	H4N	e	1	-3
nicrnt_e	nicrnt_e	C11H12NO9P	e	-2	1
o2_e	o2_e	O2	e	0	-2
orn_e	orn_e	C5H13N2O2	e	1	0
phe_L_e	phe_L_e	C9H11NO2	e	0	0
pheme_e	pheme_e	C34H30FeN4O4	e	-2	-2
pi_e	pi_e	HO4P	e	-2	-2
pnto_R_e	pnto_R_e	C9H16NO5	e	-1	-1
ppbng_e	ppbng_e	C10H13N2O4	e	-1	-1
pro_L_e	pro_L_e	C5H9NO2	e	0	0
pydx5p_e	pydx5p_e	C8H8NO6P	e	-2	-2
q8_e	q8_e	C49H74O4	e	0	0
ribflv_e	ribflv_e	C17H20N4O6	e	0	0
ser_L_e	ser_L_e	C3H7NO3	e	0	0
sheme_e	sheme_e	C42H36FeN4O16	e	-8	-8
skm_e	skm_e	C7H9O5	e	-1	-1
so4_e	so4_e	O4S	e	-2	-2
succ_e	succ_e	C4H4O4	e	-2	-2
thf_e	thf_e	C19H21N7O6	e	-2	1
thm_e	thm_e	C12H17N4OS	e	1	-2
thmpp_e	thmpp_e	C12H16N4O7P2S	e	-2	0
thr_L_e	thr_L_e	C4H9NO3	e	0	0
trp_L_e	trp_L_e	C11H12N2O2	e	0	0
tyr_L_e	tyr_L_e	C9H11NO3	e	0	-3
udpglcur_e	udpglcur_e	C15H19N2O18P2	e	-3	-4
utp_e	utp_e	C9H11N2O15P3	e	-4
val_L_e	val_L_e	C5H11NO2	e	0
zn2_e	zn2_e	Zn	e	2
Aphid_Cc_Biomass_e	Aphid_Cc_Biomass_e		e	0	-3
BCc_Biomass_e	BCc_Biomass_e		e	0	-2
SCc_Biomass_e	SCc_Biomass_e		e	0	0

## Sheet: Optimal Flux Distribution
Reaction ID	Flux value
System_Growth	0.454723
Aphid_Cc_Biomass	0.409251
Aphid_Cc_H2S2lipopb	1.22775e-06
Aphid_Cc_cys2amet	0
Aphid_Cc_cys2hcys	4.32439
Aphid_Cc_cys2met	0
Aphid_Cc_phe2tyr	0.0741541
BCc_8AONNt	1.3187e-06
BCc_ACHBS	0.138325
BCc_ACKr	-1.50868
BCc_ACLS	0.370402
BCc_ACt	0
BCc_ACt_reverse	1.50868
BCc_ADK1	0.197587
BCc_AICARt	0.0424704
BCc_AKGDH	0.178935
BCc_AKGt	0.71436
BCc_ALAt	0.01135
BCc_AMETt	7.75302e-06
BCc_AMPt	0.046335
BCc_ANS	0.0195269
BCc_ANTHt	0.0195269
BCc_AOXSr2	1.3187e-06
BCc_ARGSL	0.108781
BCc_ARGSS	0.108781
BCc_ARGt	0.102246
BCc_ASAD	0.443322
BCc_ASNt	0.00532553
BCc_ASPK	0.443322
BCc_ASPt	0.557428
BCc_ATPM	3.15
BCc_ATPPRT	0.0424704
BCc_BTNt	4.54723e-07
BCc_BTNt_reverse	0
BCc_Biomass_whith_lipids_BCc	0.0227361
BCc_C160SN	0.00490305
BCc_C180SN	0.000281155
BCc_C80SN	6.82084e-07
BCc_CBPS	0.108781
BCc_CHORM	0.163163
BCc_CHORS	0.18269
BCc_CO2t	3.69432
BCc_COAt	0.0417611
BCc_CTPt	0.00295113
BCc_CYSt	0.00202324
BCc_CYTBO3	0.956764
BCc_DAD5t	1.36417e-06
BCc_DAPDC	0.178935
BCc_DAPE	0.178935
BCc_DDPA	0.182999
BCc_DHAD1	0.370402
BCc_DHAD2	0.138325
BCc_DHDPRy	0.178935
BCc_DHDPS	0.178935
BCc_DHQD	0.182999
BCc_DHQS	0.182999
BCc_DM_ahcys_c	1.3187e-06
BCc_EGMEACPR	1.3187e-06
BCc_ENO	3.11147
BCc_EPMEACPR	1.3187e-06
BCc_FADt	5.07016e-06
BCc_FBA	1.48619
BCc_FRDPt	5.07016e-06
BCc_FUMt	0.108781
BCc_G6PDH2r	0.82576
BCc_G6Pt	1.85075
BCc_GAPD	3.11147
BCc_GHMT2	4.32441
BCc_GLNt	0.176592
BCc_GLUt	0.728331
BCc_GLUt_reverse	0
BCc_GLYt	0
BCc_GLYt_reverse	4.31087
BCc_GND	0.82576
BCc_GTPt	0.0047546
BCc_H2Ot	-2.993
BCc_H2St	1.36417e-06
BCc_HCO3E	0.108781
BCc_HCYSt	4.32439
BCc_HEMEOS	5.07016e-06
BCc_HISTD	0.0424704
BCc_HISTP	0.0424704
BCc_HISt	0.0403774
BCc_HSDy	0.264387
BCc_HSK	0.264387
BCc_HSTPT	0.0424704
BCc_Ht	0
BCc_IG3PS	0.0424704
BCc_IGPDH	0.0424704
BCc_ILETA	0.138325
BCc_ILEt	0.131906
BCc_IPMD	0.198567
BCc_IPPMIa	0.198567
BCc_IPPMIb	0.198567
BCc_IPPS	0.198567
BCc_KARA1i	0.370402
BCc_KARA2i	0.138325
BCc_KAS14	0.00518489
BCc_LEUTAi	0.198567
BCc_LEUt	0.188614
BCc_LIPOPBt	0
BCc_LIPOS	6.82084e-07
BCc_LYSt	0.171353
BCc_MACPD	0.00518489
BCc_MALCOAMT	1.3187e-06
BCc_MCOATA	0.0417636
BCc_MEOHt	1.3187e-06
BCc_METS	4.32439
BCc_METt	0
BCc_METt_reverse	4.321
BCc_MTHFC	5.07016e-06
BCc_MTHFD	5.07016e-06
BCc_MTHFR2	4.3244
BCc_NADH16	0
BCc_NADH5	0.956764
BCc_NADPt	2.54645e-06
BCc_NADt	4.06295e-05
BCc_NH4t	0.138325
BCc_O2t	0.478382
BCc_OCBT	0.108781
BCc_OCTNLL	6.82084e-07
BCc_OGMEACPD	1.3187e-06
BCc_OGMEACPR	1.3187e-06
BCc_OGMEACPS	1.3187e-06
BCc_OMCDC	0.198567
BCc_OPMEACPD	1.3187e-06
BCc_OPMEACPR	1.3187e-06
BCc_OPMEACPS	1.3187e-06
BCc_ORNITHINEt	0.108781
BCc_PDH	1.70725
BCc_PFK	1.48619
BCc_PGI	1.02499
BCc_PGK	3.11147
BCc_PGL	0.82576
BCc_PGM	3.11147
BCc_PHEMEt	5.07016e-06
BCc_PHETA	0.163163
BCc_PHEt	0.15907
BCc_PIt	1.87704
BCc_PMEACPE	1.3187e-06
BCc_PPA	0.210775
BCc_PPNDH	0.163163
BCc_PRAMPC	0.0424704
BCc_PRATPP	0.0424704
BCc_PRMICIi	0.0424704
BCc_PROt	0.00488368
BCc_PRPPS	0.0424704
BCc_PSCVT	0.18269
BCc_PTAr	1.50868
BCc_PYDX5Pt	5.07016e-06
BCc_PYK	2.74578
BCc_Q8t	5.07016e-06
BCc_RIBFLVt	5.07016e-06
BCc_RPE	0.461193
BCc_RPI	0.364566
BCc_SDPDS	0.178935
BCc_SDPTA	0.178935
BCc_SERt	4.32917
BCc_SHK3Dr	0.182999
BCc_SHKK	0.18269
BCc_SKMt	0.00030928
BCc_SUCCt	0.178935
BCc_TALA	0.322096
BCc_THDPS	0.178935
BCc_THFt	2.02806e-05
BCc_THMPPt	5.07016e-06
BCc_THRD_L	0.138325
BCc_THRS	0.264387
BCc_THRt	0.120458
BCc_TKT1	0.322096
BCc_TKT2	0.139097
BCc_TPI	1.48619
BCc_TRPt	0.00125581
BCc_TYRLt	0.00304648
BCc_UTPt	0.00318536
BCc_VALTA	0.171835
BCc_VALt	0.162486
BCc_dATPt	0.00056397
BCc_dCTPt	0.000582318
BCc_dGTPt	0.000582318
BCc_dTTPt	0.00056397
BCc_malcoat	0.0417649
SCc_4AMPMt	0
SCc_4PASPt	0.000627518
SCc_8AONNt	1.3187e-06
SCc_A5PISO	0.00183935
SCc_ACCOACr	0.0652718
SCc_ACKr	4.09504
SCc_ACOATA	-1.16415e-10
SCc_ACt	8.45028
SCc_ADCL	0.00030928
SCc_ADCS	0.00030928
SCc_ADK1	4.46759
SCc_ADSK	4.35397
SCc_ADSL1r	0.0515447
SCc_ADSS	0.0515447
SCc_AGMHE	0.000572951
SCc_AHCYSt	1.01403e-05
SCc_AKGt	0.000728921
SCc_ALAALAr	0.000627518
SCc_ALAt	0.0119762
SCc_AMAOTr	1.3187e-06
SCc_AMETt	0
SCc_AMETt_reverse	7.75302e-06
SCc_AMOBt	1.3187e-06
SCc_AMPMS2	0
SCc_AMPt	0.046335
SCc_ANPRT	0.0195269
SCc_ANTHt	0.0195269
SCc_APRAUR	0.000202806
SCc_ARGt	0.00653482
SCc_ASAD	0.000627518
SCc_ASNN	0.0714357
SCc_ASNt	0.0767613
SCc_ASPCT	0.0145655
SCc_ASPt2	0
SCc_ATPM	3.15
SCc_ATPS4r	9.61821
SCc_BPNT	4.35397
SCc_BTNt	0
SCc_BTNt_reverse	1.27322e-06
SCc_BTS5	1.3187e-06
SCc_Biomass_whith_wall_SCc	0.0227361
SCc_C120SN	0.00316601
SCc_C140SN	0.000314168
SCc_C141SN	0.000307961
SCc_C160SN	0.00221732
SCc_C161SN	0.000431145
SCc_C181SN	0.00307961
SCc_CBPS	0.0145655
SCc_CDPMEK	2.89658e-05
SCc_CHORS	0.00030928
SCc_CLPNS_SCc	0.000146648
SCc_CO2t	17.3259
SCc_CPPPGO	0.000192666
SCc_CTPS2	0.00706689
SCc_CTPt	0.00295113
SCc_CYSS	4.35397
SCc_CYSt	4.35194
SCc_CYTBO3	17.082
SCc_CYTK1	0.00495175
SCc_DAD5t	1.3187e-06
SCc_DAGK_SCc	0.000381967
SCc_DALAt	0.00125504
SCc_DAPE	0.000627518
SCc_DASYN_SCc	0.00346158
SCc_DB4PS	0.000405613
SCc_DBTSr	1.3187e-06
SCc_DCTPD	0
SCc_DHDPRy	0.000627518
SCc_DHDPS	0.000627518
SCc_DHFR	0.00143722
SCc_DHFS	0.00030928
SCc_DHNPA2	0.00030928
SCc_DHORD2	0.0145655
SCc_DHORTS	0.0145655
SCc_DHPPDA2	0.000202806
SCc_DHPS2	0.00030928
SCc_DMATT	6.32065e-06
SCc_DMPPS	6.32065e-06
SCc_DNMPPA	0.00030928
SCc_DNTPPA	0.00030928
SCc_DPCOAK	3.81967e-06
SCc_DTMPK	0.00112794
SCc_DUTPDP	0
SCc_DXPRIi	2.89658e-05
SCc_DXPS	0.000130369
SCc_E4PD	0.000101403
SCc_EDTXS1	0.000633202
SCc_EDTXS2	0.000190984
SCc_ENO	8.52955
SCc_FADt	9.6333e-05
SCc_FBA	2.8108
SCc_FCLT	0.000192666
SCc_FE2abc	0.000197736
SCc_FMNAT	0.000101403
SCc_FMNt	0
SCc_FORt	0.000917699
SCc_FRUK	2.8108
SCc_FRUpts	2.8108
SCc_FUMt2_2	0.0515447
SCc_G1PACT	0.00252144
SCc_G3PD2	0.00390039
SCc_G6PDH2r	8.77606
SCc_GALU	0.000381967
SCc_GAPD	8.52955
SCc_GARFT	0
SCc_GCALDt	0.00030928
SCc_GF6PTA	0.00252144
SCc_GHMT2	0.00113808
SCc_GK1	0.0111859
SCc_GLCpts	2.9951
SCc_GLNabc	0.041463
SCc_GLUCYS	5.07016e-06
SCc_GLUPRT	0
SCc_GLUR	0.000627518
SCc_GLUt	0
SCc_GLUt_reverse	0.0281644
SCc_GLYCt	0.000146648
SCc_GLYt	0.0124017
SCc_GLYt_reverse	0
SCc_GMHEPAT	0.000572951
SCc_GMHEPK	0.000572951
SCc_GMHEPPA	0.000572951
SCc_GMPS2	0.0111859
SCc_GND	8.77606
SCc_GRTT	6.32065e-06
SCc_GTHRDt	0
SCc_GTHS	5.07016e-06
SCc_GTPCI	0.00030928
SCc_GTPCII2	0.000202806
SCc_GTPt	0.0047546
SCc_H2Ot	22.0721
SCc_H2St	3.81967e-06
SCc_HCO3E	0.0798373
SCc_HEMEOS	5.07016e-06
SCc_HISt	0.002093
SCc_HMBS	0.000197736
SCc_HPPK2	0.00030928
SCc_HXPRT	0.0627306
SCc_HYXNt	0.0627306
SCc_IGPS	0.0195269
SCc_ILEt	0.00641855
SCc_IMPD	0.0111859
SCc_IPDPS	2.26452e-05
SCc_K2L4ALabc	0.000442218
SCc_KAS14	0
SCc_KAS15	0.00951621
SCc_KAS16	0.00253281
SCc_KDOCT2	0.00183935
SCc_KDOPP	0.00183935
SCc_KDOPS	0.00183935
SCc_Kt2	0.00403794
SCc_LEUt	0.00995338
SCc_LPADSS	0.000633202
SCc_LPSSYN_SCc	0.000190984
SCc_LYSt	0.00758132
SCc_MACPD	0
SCc_MCOATA	0.0652718
SCc_MECDPDH	2.89658e-05
SCc_MECDPS	2.89658e-05
SCc_MEPCT	2.89658e-05
SCc_METAT	2.56009e-05
SCc_METt	0.00341961
SCc_METt_reverse	0
SCc_MOAT	0.000633202
SCc_MOAT2	0.000633202
SCc_MTHFC	5.07016e-06
SCc_MTHFD	5.07016e-06
SCc_NADH5	17.0674
SCc_NADK	5.0929e-06
SCc_NADPt	2.54645e-06
SCc_NADS1	8.63519e-05
SCc_NADt	4.06295e-05
SCc_NDPK1	4.41554
SCc_NDPK2	0.016341
SCc_NDPK3	0.00416908
SCc_NDPK4	0.00112794
SCc_NDPK5	0.00116464
SCc_NDPK6	1.16415e-10
SCc_NDPK7	0.00116464
SCc_NDPK8	0.00112794
SCc_NH4t	-0.0723431
SCc_NICRNTt	8.63519e-05
SCc_NNAT	8.63519e-05
SCc_O2t	8.54148
SCc_OHPBAT	0.000101403
SCc_OMPDC	0.0145655
SCc_ORPT	0.0145655
SCc_PAPPT3	0.000627518
SCc_PAPSR	4.35397
SCc_PASYN_SCc	0.00307961
SCc_PDH	8.52632
SCc_PDX5PO2	0.000101403
SCc_PDX5PS	0.000101403
SCc_PEPT_SCc	0.000381967
SCc_PERD	0.000101403
SCc_PFK	0
SCc_PGAMT	0.00252144
SCc_PGI	-5.78134
SCc_PGK	8.52955
SCc_PGL	8.77606
SCc_PGM	8.52955
SCc_PGMT	0.000381967
SCc_PGPP_SCc	0.000820775
SCc_PGSA_SCc	0.000820775
SCc_PHEMEt	0.000187596
SCc_PHEt	0.00409298
SCc_PIt	0.107359
SCc_PMDPHT	0.000202806
SCc_PNTK	3.81967e-06
SCc_PNTOt	3.81967e-06
SCc_PPA	0
SCc_PPA2	0
SCc_PPBNGt	0.000790945
SCc_PPCDC	3.81967e-06
SCc_PPK2r	0
SCc_PPKr	-4.48899
SCc_PPNCL2	3.81967e-06
SCc_PPPGO	0.000192666
SCc_PPTGS	0.000627518
SCc_PRAGSr	0
SCc_PRAIS	0
SCc_PRAIi	0.0195269
SCc_PRFGS	0
SCc_PROt	0.00488368
SCc_PRPPS	0.096823
SCc_PSCVT	0.00030928
SCc_PSD_SCc	0.00258169
SCc_PSSA_SCc	0.0026408
SCc_PTAr	4.09504
SCc_PTPATi	3.81967e-06
SCc_PYDX5Pt	9.6333e-05
SCc_PYK	2.72087
SCc_RBFK	0.000101403
SCc_RBFSa	0.000405613
SCc_RBFSb	0.000202806
SCc_RIBFLVt	9.6333e-05
SCc_RNDR1	0.00112794
SCc_RNDR2	0.00116464
SCc_RNDR3	0.00116464
SCc_RNDR4	0.00112794
SCc_RPE	5.78444
SCc_RPI	2.98938
SCc_S7PI	0.000572951
SCc_SADT2	4.35397
SCc_SDPDS	0.000627518
SCc_SDPTA	0.000627518
SCc_SERAT	4.35397
SCc_SERt	4.38204
SCc_SHCHD2	5.07016e-06
SCc_SHCHF	5.07016e-06
SCc_SHEMEt	0
SCc_SHKK	0.00030928
SCc_SKMt	0.00030928
SCc_SUCOAS	0.000627518
SCc_SULR	4.35397
SCc_SULabc	4.35397
SCc_TALA	2.89198
SCc_TDSK	0.000633202
SCc_THDPS	0.000627518
SCc_THFt	0.000294069
SCc_THMPPt	9.6333e-05
SCc_THMabc	0.000101403
SCc_THRt	0.0056046
SCc_TKT1	2.89256
SCc_TKT2	2.89188
SCc_TMDS	0.00112794
SCc_TMKr	0.000101403
SCc_TMPKr	0.000101403
SCc_TPI	2.8069
SCc_TRDR	4.35856
SCc_TRPS2	0.0195269
SCc_TRPS3	0.0195269
SCc_TRPt	0.0182711
SCc_TYRt	0.00304648
SCc_U23GAAT	0.0012664
SCc_UAAGDS	0.000627518
SCc_UAGAAT	0.0012664
SCc_UAGCVT	0.000627518
SCc_UAGDP	0.00252144
SCc_UAGPT3	0.000627518
SCc_UAMAGS	0.000627518
SCc_UAMAS	0.000627518
SCc_UAPGR	0.000627518
SCc_UDCPDP	0.000627518
SCc_UDCPDPS	1.25049e-06
SCc_UDPGD	0
SCc_UDPGLCURt	0
SCc_UGMDDS	0.000627518
SCc_UHGADA	0.0012664
SCc_UMPK	0.0158263
SCc_UPP3MT	5.07016e-06
SCc_UPP3S	0.000197736
SCc_UPPDC1	0.000192666
SCc_URIDK2r	-0.00112794
SCc_USHD	0.000633202
SCc_UTPt	0.00318536
SCc_VALt	0.00934874
SCc_ZNabc	7.18007e-05
SCc_dATPt	0.00056397
SCc_dCTPt	0.000582318
SCc_dGTPt	0.000582318
SCc_dTTPt	0.00056397
EX_4ampm_e	0
EX_4pasp_e	-0.000627518
EX_Aphid_Cc_Biomass	0
EX_BCc_Biomass	0
EX_SCc_Biomass	0
EX_ac_e	9.95896
EX_ahcys_e	1.01403e-05
EX_aicar_e	0.0424704
EX_akg_e	0.715089
EX_ala_D_e	-0.00125504
EX_ala_L_e	-0.0233263
EX_amet_e	0
EX_amob_e	1.3187e-06
EX_amp_e	0
EX_anth_e	0
EX_arg_L_e	0
EX_asn_L_e	-0.0820868
EX_asp_L_e	-0.557428
EX_btn_e	0
EX_co2_e	21.0202
EX_coa_e	0.0417611
EX_ctp_e	0
EX_cys_L_e	0
EX_dad_5_e	2.68286e-06
EX_datp_e	0
EX_dctp_e	0
EX_dgtp_e	0
EX_dttp_e	0
EX_fad_e	0
EX_fe2_e	-0.000197736
EX_fmn_e	0
EX_for_e	0.000917699
EX_frdp_e	-5.07012e-06
EX_fru_e	-2.8108
EX_fum_e	0.160325
EX_g6p_e	-1.85075
EX_gcald_e	0.00030928
EX_glc_D_e	-2.9951
EX_gln_L_e	-0.218055
EX_glu_L_e	-0.700166
EX_gly_e	4.29847
EX_glyc_e	0.000146648
EX_gthrd_e	0
EX_gtp_e	0
EX_h2o_e	25.0651
EX_h2s_e	0
EX_h_e	1.66247
EX_hcys_L_e	0
EX_his_L_e	0
EX_hxan_e	-0.0627306
EX_ile_L_e	0
EX_k_e	-0.00403794
EX_leu_L_e	0
EX_lipopb_e	0
EX_lys_L_e	0
EX_malcoa_e	-0.0417649
EX_meoh_e	1.3187e-06
EX_met_L_e	4.26866
EX_nad_e	0
EX_nadp_e	0
EX_nh4_e	0.210668
EX_nicrnt_e	-8.63519e-05
EX_o2_e	-9.01986
EX_orn_e	-0.108781
EX_phe_L_e	0
EX_pheme_e	0
EX_pi_e	1.76968
EX_pnto_R_e	-3.8197e-06
EX_ppbng_e	-0.000790945
EX_pro_L_e	-0.00976736
EX_pydx5p_e	0
EX_q8_e	-5.07012e-06
EX_ribflv_e	0
EX_ser_L_e	-8.71122
EX_sheme_e	0
EX_so4_e	-4.35397
EX_succ_e	0.178935
EX_thf_e	0
EX_thm_e	-0.000101403
EX_thmpp_e	0
EX_thr_L_e	0
EX_trp_L_e	0
EX_tyr_L_e	0
EX_udpglcur_e	0
EX_utp_e	0
EX_val_L_e	0
EX_zn2_e	-7.18008e-05

## Sheet: Exchange Patterns
Compound	Cedar aphid	B. aphidicola Bcc	S. symbiotica SCc	System exchange
4PASP (e)	0	0	-0.000627518	-0.000627518
8AONN (e)	0	1.3187e-06	-1.3187e-06	0
ALA-D (e)	0	0	-0.00125504	-0.00125504
HXAN (e)	0	0	-0.0627292	-0.0627292
PNTO-R (e)	0	0	-3.81967e-06	-3.81967e-06
PPBNG (e)	0	0	-0.000790945	-0.000790945
NICRNT (e)	0	0	-8.63519e-05	-8.63519e-05
THM (e)	0	0	-0.000101403	-0.000101403
FE2 (e)	0	0	-0.000197736	-0.000197736
K (e)	0	0	-0.00403794	-0.00403794
SO4 (e)	0	0	-4.35396	-4.35396
ZN2 (e)	0	0	-7.18007e-05	-7.18007e-05
FRDP (e)	0	-5.07016e-06	0	-5.07016e-06
MALCOA (e)	0	-0.0417587	0	-0.0417587
ORN (e)	0	-0.108781	0	-0.108781
Q8 (e)	0	-5.07016e-06	0	-5.07016e-06
4AMPM (e)	0	0	0	0
AHCYS (e)	0	0	1.01403e-05	1.01403e-05
AMOB (e)	0	0	1.3187e-06	1.3187e-06
FOR (e)	0	0	0.000917699	0.000917699
GLYC (e)	0	0	0.000146648	0.000146648
GCALD (e)	0	0	0.00030928	0.00030928
AICAR (e)	0	0.0424704	0	0.0424704
SUCC (e)	0	0.178935	0	0.178935
AC (e)	0	1.50863	8.45025	9.95888
AKG (e)	0	0.714397	0.000728921	0.715126
FUM (e)	0	0.108781	0.0515433	0.160324
DAD-5 (e)	0	0	1.3187e-06	1.3187e-06
PI (e)	0	1.87705	-0.107359	1.7697
H2O (e)	0	2.99303	22.072	25.0651
CO2 (e)	0	3.69432	17.3258	21.0201
H (e)	0	1.91352	-0.251048	1.66248
NH4 (e)	0	0.138325	0.0723418	0.210667
GLC-D (e)	0	0	-5.80588	-5.80588
G6P (e)	0	-1.85077	0	-1.85077
O2 (e)	0	-0.478381	-8.54145	-9.01983
AMP (e)	0	-0.046335	0.046335	0
ANTH (e)	0	0.0195269	-0.0195269	0
SKM (e)	0	0.00030928	-0.00030928	0
HCYS-L (e)	4.32437	-4.32437	0	0
AMET (e)	0	-6.38886e-06	6.38886e-06	0
ALA-L (e)	0	-0.01135	-0.0119762	-0.0233263
ASN-L (e)	0	-0.00532553	-0.0767599	-0.0820854
ASP-L (e)	0	-0.557428	0	-0.557428
GLN-L (e)	0	-0.176592	-0.041463	-0.218055
GLU-L (e)	0	-0.728368	0.0281644	-0.700204
PRO-L (e)	0	-0.00488368	-0.00488368	-0.00976736
SER-L (e)	0	-4.32916	-4.38203	-8.71118
ARG-L (e)	-0.095711	0.102246	-0.00653482	0
CYS-L (e)	-4.3499	-0.00202324	4.35192	0
GLY (e)	0	4.31085	-0.0124017	4.29845
HIS-L (e)	-0.0382844	0.0403774	-0.002093	0
ILE-L (e)	-0.125488	0.131906	-0.00641855	0
LEU-L (e)	-0.17866	0.188614	-0.00995338	0
PHE-L (e)	-0.154977	0.15907	-0.00409298	0
THR-L (e)	-0.114853	0.120458	-0.0056046	0
TRP-L (e)	-0.0170153	-0.00125581	0.0182711	0
TYR-L (e)	0.00609297	-0.00304648	-0.00304648	0
VAL-L (e)	-0.153138	0.162523	-0.00934874	3.7113e-05
LYS-L (e)	-0.163772	0.171353	-0.00758132	0
MET-L (e)	-0.0489189	4.32098	-0.00341824	4.26864
H2S (e)	-3.81967e-06	0	3.81967e-06	0
PHEME (e)	-0.000182526	-5.07016e-06	0.000187596	0
RIBFLV (e)	-9.12629e-05	-5.07016e-06	9.6333e-05	0
THF (e)	-0.000273789	-2.02806e-05	0.000294069	0
THMPP (e)	-9.12629e-05	-5.07016e-06	9.6333e-05	0
PYDX5P (e)	-9.12629e-05	-5.07016e-06	9.6333e-05	0
BTN (e)	-8.18501e-07	-4.54723e-07	1.27322e-06	0
FAD (e)	-9.12629e-05	-5.07016e-06	9.6333e-05	0
CTP (e)	0	-0.00295113	0.00295113	0
GTP (e)	0	-0.0047546	0.0047546	0
UTP (e)	0	-0.00318536	0.00318536	0
DATP (e)	0	-0.00056397	0.00056397	0
DCTP (e)	0	-0.000582318	0.000582318	0
DGTP (e)	0	-0.000582318	0.000582318	0
DTTP (e)	0	-0.00056397	0.00056397	0
NADP (e)	0	-2.54645e-06	2.54645e-06	0
NAD (e)	0	-4.06295e-05	4.06295e-05	0
