# Supplementary material for: Determinism and Contingency Shape Metabolic Complementation in an Endosymbiotic Consortium
Source: Front Microbiol. 2017 Nov 22;8:2290. doi: 10.3389/fmicb.2017.02290 (PMC5702781; doi:10.3389/fmicb.2017.02290)
Supplement: Supplementary Table S4 — Results from the robustness analysis. The table include two sheets. The first sheet lists the results from the single KO in-silico experiments, whereas the second sheet includes the results of the double KO in-silico experiments. [file Table4.XLSX]

## Sheet: Single KO
GENE ID	FBA	MOMA	Reaction encoded by gene
BCc_017	dispensable	lethal	(BCc_METS)
BCc_030	lethal	lethal	(BCc_MTHFR2)
BCc_032	lethal	lethal	(BCc_ARGSS)
BCc_033	lethal	lethal	(BCc_ARGSL)
BCc_053	lethal	lethal	(BCc_PPA)
BCc_056	lethal	lethal	(BCc_KAS14 BCc_C160SN BCc_MACPD BCc_OGMEACPS BCc_C180SN BCc_C80SN BCc_OPMEACPS)
BCc_057	dispensable	lethal	(BCc_TALA)		Results summary
BCc_058	lethal	lethal	(BCc_TKT1 BCc_TKT2)
BCc_059	lethal	lethal	(BCc_SDPDS)			Whole system	S. symbiotica SCc	B. aphidicola Cc
BCc_060	lethal	lethal	(BCc_DHDPS)		Total genes	334	236	98
BCc_061	lethal	lethal	(BCc_CHORS)		FBA Lethals	284	209	72
BCc_063	lethal	lethal	(BCc_ATPPRT)		FBA Non lethals	50	27	26
BCc_064	lethal	lethal	(BCc_HISTD)		FBA %Fragility	85.03	88.56	73.74
BCc_065	lethal	lethal	(BCc_HSTPT)		MOMA Lethals	296	214	76
BCc_066	lethal	lethal	(BCc_HISTP BCc_IGPDH)		MOMA Non lethals	38	21	22
BCc_067	lethal	lethal	(BCc_IG3PS)		MOMA %Fragility	88.62	91.1	77.78
BCc_068	lethal	lethal	(BCc_PRMICIi)
BCc_069	lethal	lethal	(BCc_IG3PS)
BCc_070	lethal	lethal	(BCc_PRAMPC BCc_PRATPP)
BCc_071	lethal	lethal	(BCc_GND)
BCc_077	lethal	lethal	(BCc_DDPA)
BCc_090	lethal	lethal	(BCc_CBPS)
BCc_091	lethal	lethal	(BCc_CBPS)
BCc_092	lethal	lethal	(BCc_DHDPRy)
BCc_097	dispensable	dispensable	(BCc_NADH16 BCc_NADH5)
BCc_098	dispensable	dispensable	(BCc_NADH16 BCc_NADH5)
BCc_099	dispensable	dispensable	(BCc_NADH16 BCc_NADH5)
BCc_100	dispensable	dispensable	(BCc_NADH16 BCc_NADH5)
BCc_101	dispensable	dispensable	(BCc_NADH16 BCc_NADH5)
BCc_102	dispensable	dispensable	(BCc_NADH16 BCc_NADH5)
BCc_103	dispensable	dispensable	(BCc_NADH16 BCc_NADH5)
BCc_104	dispensable	dispensable	(BCc_NADH16 BCc_NADH5)
BCc_105	dispensable	dispensable	(BCc_NADH16 BCc_NADH5)
BCc_106	dispensable	dispensable	(BCc_NADH16 BCc_NADH5)
BCc_107	dispensable	dispensable	(BCc_NADH16 BCc_NADH5)
BCc_108	dispensable	dispensable	(BCc_NADH16 BCc_NADH5)
BCc_109	dispensable	dispensable	(BCc_NADH16 BCc_NADH5)
BCc_110	lethal	lethal	(BCc_PRPPS)
BCc_114	dispensable	dispensable	(BCc_ACKr)
BCc_115	dispensable	dispensable	(BCc_PTAr)
BCc_125	lethal	lethal	(BCc_THRS)
BCc_126	lethal	lethal	(BCc_HSK)
BCc_127	lethal	lethal	(BCc_ASPK BCc_HSDy)
BCc_131	dispensable	dispensable	(BCc_PDH)
BCc_132	dispensable	dispensable	(BCc_PDH)
BCc_133	lethal	lethal	(BCc_AKGDH BCc_PDH)
BCc_138	lethal	lethal	(BCc_ACHBS BCc_ACLS)
BCc_139	lethal	lethal	(BCc_ACHBS BCc_ACLS)
BCc_140	lethal	lethal	(BCc_THDPS)
BCc_147	lethal	lethal	(BCc_OPMEACPD BCc_C180SN BCc_C80SN BCc_OGMEACPD BCc_C160SN)
BCc_167	lethal	lethal	(BCc_C160SN BCc_EPMEACPR BCc_EGMEACPR BCc_C180SN BCc_C80SN)
BCc_169	lethal	lethal	(BCc_OCTNLL)
BCc_170	lethal	lethal	(BCc_LIPOS)
BCc_178	lethal	lethal	(BCc_GHMT2)
BCc_179	lethal	lethal	(BCc_PGL)
BCc_181	lethal	lethal	(BCc_GAPD)
BCc_184	lethal	lethal	(BCc_AKGDH)
BCc_185	lethal	lethal	(BCc_AKGDH)
BCc_186	lethal	lethal	(BCc_PGM)
BCc_187	lethal	lethal	(BCc_PFK)
BCc_188	lethal	lethal	(BCc_TPI)
BCc_191	lethal	lethal	(BCc_PSCVT)
BCc_192	lethal	lethal	(BCc_SDPTA)
BCc_198	dispensable	lethal	(BCc_PYK)
BCc_199	lethal	lethal	(BCc_G6PDH2r)
BCc_216	lethal	lethal	(BCc_MCOATA)
BCc_217	lethal	lethal	(BCc_OGMEACPR BCc_C160SN BCc_C80SN BCc_C180SN BCc_OPMEACPR)
BCc_224	lethal	lethal	(BCc_OCBT)
BCc_244	lethal	lethal	(BCc_CHORM BCc_PPNDH)
BCc_251	lethal	lethal	(BCc_DHQD)
BCc_259	lethal	lethal	(BCc_RPI)
BCc_264	lethal	lethal	(BCc_ENO)
BCc_271	lethal	lethal	(BCc_DAPDC)
BCc_277	lethal	lethal	(BCc_ASAD)
BCc_278	lethal	lethal	(BCc_PGK)
BCc_279	lethal	lethal	(BCc_FBA)
BCc_287	lethal	lethal	(BCc_HEMEOS)
BCc_288	dispensable	dispensable	(BCc_CYTBO3)
BCc_289	dispensable	dispensable	(BCc_CYTBO3)
BCc_290	dispensable	dispensable	(BCc_CYTBO3)
BCc_291	dispensable	dispensable	(BCc_CYTBO3)
BCc_303	lethal	lethal	(BCc_ADK1)
BCc_305	lethal	lethal	(BCc_MTHFC BCc_MTHFD)
BCc_312	lethal	lethal	(BCc_SHK3Dr)
BCc_351	dispensable	lethal	(BCc_RPE)
BCc_352	lethal	lethal	(BCc_DHQS)
BCc_353	lethal	lethal	(BCc_SHKK)
BCc_356	lethal	lethal	(BCc_PMEACPE)
BCc_372	dispensable	dispensable	(BCc_PGI)
BCc_380	lethal	lethal	(BCc_DAPE)
BCc_388	lethal	lethal	(BCc_KARA1i BCc_KARA2i)
BCc_389	lethal	lethal	(BCc_DHAD2 BCc_DHAD1)
BCc_pL01	lethal	lethal	(BCc_IPPS)
BCc_pL03	lethal	lethal	(BCc_OMCDC BCc_IPMD)
BCc_pL04	lethal	lethal	(BCc_IPPMIa BCc_IPPMIb)
BCc_pL05	lethal	lethal	(BCc_IPPMIa BCc_IPPMIb)
BCc_pT01	lethal	lethal	(BCc_ANS)
BCc_pT02	lethal	lethal	(BCc_ANS)
SCc_001	lethal	lethal	(SCc_ATPS4r)
SCc_002	lethal	lethal	(SCc_ATPS4r)
SCc_003	lethal	lethal	(SCc_ATPS4r)
SCc_004	lethal	lethal	(SCc_ATPS4r)
SCc_005	lethal	lethal	(SCc_ATPS4r)
SCc_006	lethal	lethal	(SCc_ATPS4r)
SCc_007	lethal	lethal	(SCc_ATPS4r)
SCc_008	lethal	lethal	(SCc_ATPS4r)
SCc_009	lethal	lethal	(SCc_G1PACT SCc_UAGDP)
SCc_010	lethal	lethal	(SCc_GF6PTA)
SCc_012	lethal	lethal	(SCc_Kt2)
SCc_013	lethal	lethal	(SCc_PPPGO)
SCc_014	dispensable	dispensable	(SCc_PGI)
SCc_015	lethal	lethal	(SCc_PASYN_SCc)
SCc_016	lethal	lethal	(SCc_GTHS)
SCc_027	lethal	lethal	(SCc_ORPT)
SCc_028	dispensable	dispensable	(SCc_DUTPDP)
SCc_033	lethal	lethal	(SCc_PTPATi)
SCc_035	lethal	lethal	(SCc_MOAT SCc_MOAT2)
SCc_037	lethal	lethal	(SCc_SERAT)
SCc_038	lethal	lethal	(SCc_G3PD2)
SCc_043	lethal	lethal	(SCc_AGMHE)
SCc_044	lethal	lethal	(SCc_LPSSYN_SCc)
SCc_045	lethal	lethal	(SCc_LPSSYN_SCc)
SCc_047	lethal	lethal	(SCc_LPSSYN_SCc)
SCc_060	lethal	lethal	(SCc_PGAMT)
SCc_061	lethal	lethal	(SCc_DHPS2)
SCc_068	dispensable	dispensable	(SCc_PPA2 SCc_PPA)
SCc_069	lethal	lethal	(SCc_Kt2)
SCc_075	lethal	lethal	(SCc_GLUt_reverse SCc_FUMt2_2 SCc_ASPt2 SCc_GLUt)
SCc_078	lethal	lethal	(SCc_PSD_SCc)
SCc_087	lethal	lethal	(SCc_ADSS)
SCc_094	lethal	lethal	(SCc_BPNT)
SCc_101	lethal	lethal	(SCc_LPSSYN_SCc)
SCc_108	dispensable	lethal	(SCc_TALA)
SCc_111	lethal	lethal	(SCc_FMNAT SCc_RBFK)
SCc_114	lethal	lethal	(SCc_DMPPS SCc_IPDPS)
SCc_115	lethal	lethal	(SCc_DHDPRy)
SCc_116	lethal	lethal	(SCc_CBPS)
SCc_117	lethal	lethal	(SCc_CBPS)
SCc_118	lethal	lethal	(SCc_DHFR)
SCc_122	lethal	lethal	(SCc_PDX5PS)
SCc_126	lethal	lethal	(SCc_THMabc)
SCc_127	lethal	lethal	(SCc_THMabc)
SCc_128	lethal	lethal	(SCc_THMabc)
SCc_132	lethal	lethal	(SCc_UAAGDS)
SCc_133	lethal	lethal	(SCc_UGMDDS)
SCc_134	lethal	lethal	(SCc_PAPPT3)
SCc_135	lethal	lethal	(SCc_UAMAGS)
SCc_137	lethal	lethal	(SCc_UAGPT3)
SCc_138	lethal	lethal	(SCc_UAMAS)
SCc_139	lethal	lethal	(SCc_ALAALAr)
SCc_143	lethal	lethal	(SCc_UHGADA)
SCc_146	lethal	lethal	(SCc_DPCOAK)
SCc_149	lethal	lethal	(SCc_CTPS2)
SCc_150	lethal	lethal	(SCc_ENO)
SCc_154	lethal	lethal	(SCc_SULR)
SCc_155	lethal	lethal	(SCc_SULR)
SCc_156	lethal	lethal	(SCc_PAPSR)
SCc_157	lethal	lethal	(SCc_SHCHF SCc_SHCHD2 SCc_UPP3MT)
SCc_158	lethal	lethal	(SCc_SADT2)
SCc_159	lethal	lethal	(SCc_SADT2)
SCc_160	lethal	lethal	(SCc_ADSK)
SCc_162	lethal	lethal	(SCc_MEPCT)
SCc_163	lethal	lethal	(SCc_MECDPS)
SCc_171	lethal	lethal	(SCc_GLUCYS)
SCc_184	lethal	lethal	(SCc_TKT1 SCc_TKT2)
SCc_185	lethal	lethal	(SCc_PGK)
SCc_186	lethal	lethal	(SCc_FBA)
SCc_187	lethal	lethal	(SCc_RPI)
SCc_196	lethal	lethal	(SCc_TMDS)
SCc_203	lethal	lethal	(SCc_THDPS)
SCc_207	dispensable	dispensable	(SCc_UMPK SCc_URIDK2r)
SCc_209	lethal	lethal	(SCc_DXPRIi)
SCc_210	lethal	lethal	(SCc_UDCPDPS)
SCc_211	lethal	lethal	(SCc_DASYN_SCc)
SCc_215	lethal	lethal	(SCc_U23GAAT)
SCc_216	lethal	lethal	(SCc_C120SN SCc_C141SN SCc_C181SN SCc_C161SN SCc_C160SN SCc_C140SN)
SCc_217	lethal	lethal	(SCc_UAGAAT)
SCc_218	lethal	lethal	(SCc_LPADSS)
SCc_220	lethal	lethal	(SCc_ACCOACr)
SCc_224	lethal	lethal	(SCc_GMHEPPA)
SCc_225	lethal	lethal	(SCc_PSSA_SCc)
SCc_228	lethal	lethal	(SCc_S7PI)
SCc_241	lethal	lethal	(SCc_NADK)
SCc_249	lethal	lethal	(SCc_PDX5PS)
SCc_251	lethal	lethal	(SCc_SUCOAS)
SCc_252	lethal	lethal	(SCc_SUCOAS)
SCc_253	lethal	lethal	(SCc_PGMT)
SCc_257	lethal	lethal	(SCc_NNAT)
SCc_272	lethal	lethal	(SCc_HXPRT)
SCc_275	lethal	lethal	(SCc_HPPK2)
SCc_278	dispensable	dispensable	(SCc_METAT)
SCc_286	lethal	lethal	(SCc_LEUt SCc_ILEt SCc_VALt)
SCc_295	lethal	lethal	(SCc_NICRNTt SCc_RIBFLVt)
SCc_296	lethal	lethal	(SCc_PGM)
SCc_297	dispensable	lethal	(SCc_PGL)
SCc_299	dispensable	dispensable	(SCc_PPA2 SCc_PPA)
SCc_300	dispensable	dispensable	(SCc_PPK2r SCc_PPKr)
SCc_302	dispensable	dispensable	(SCc_GARFT)
SCc_303	dispensable	dispensable	(SCc_PRAIS)
SCc_305	lethal	lethal	(SCc_DHDPS)
SCc_308	lethal	lethal	(SCc_SULabc)
SCc_309	lethal	lethal	(SCc_SULabc)
SCc_310	lethal	lethal	(SCc_SULabc)
SCc_311	lethal	lethal	(SCc_FRUpts SCc_GLCpts)
SCc_312	lethal	lethal	(SCc_FRUpts SCc_GLCpts)
SCc_313	lethal	lethal	(SCc_CYSS)
SCc_322	lethal	lethal	(SCc_EDTXS1 SCc_EDTXS2)
SCc_325	lethal	lethal	(SCc_PROt)
SCc_329	lethal	lethal	(SCc_MTHFC SCc_MTHFD)
SCc_331	lethal	lethal	(SCc_USHD)
SCc_332	lethal	lethal	(SCc_SDPDS)
SCc_333	lethal	lethal	(SCc_CPPPGO)
SCc_334	lethal	lethal	(SCc_GALU)
SCc_335	dispensable	dispensable	(SCc_UDPGD)
SCc_338	lethal	lethal	(SCc_CLPNS_SCc)
SCc_354	dispensable	lethal	(SCc_G6PDH2r)
SCc_361	lethal	lethal	(SCc_ALAt SCc_DALAt SCc_GLYt_reverse SCc_GLYt)
SCc_363	lethal	lethal	(SCc_FCLT)
SCc_364	lethal	lethal	(SCc_ADK1 SCc_NDPK6)
SCc_367	lethal	lethal	(SCc_ZNabc)
SCc_368	lethal	lethal	(SCc_ZNabc)
SCc_372	lethal	lethal	(SCc_GTPCII2)
SCc_377	lethal	lethal	(SCc_ANPRT)
SCc_378	lethal	lethal	(SCc_IGPS SCc_PRAIi)
SCc_379	lethal	lethal	(SCc_TRPS2 SCc_TRPS3)
SCc_380	lethal	lethal	(SCc_TRPS2 SCc_TRPS3)
SCc_385	lethal	lethal	(SCc_RBFSa SCc_PMDPHT)
SCc_388	dispensable	lethal	(SCc_PYK)
SCc_406	lethal	lethal	(SCc_ADSL1r)
SCc_414	lethal	lethal	(SCc_KDOPS)
SCc_418	lethal	lethal	(SCc_CDPMEK)
SCc_419	lethal	lethal	(SCc_PRPPS)
SCc_428	lethal	lethal	(SCc_DHORTS)
SCc_433	dispensable	dispensable	(SCc_ACOATA SCc_KAS15)
SCc_434	lethal	lethal	(SCc_MCOATA)
SCc_435	lethal	lethal	(SCc_C120SN SCc_C141SN SCc_C181SN SCc_C161SN SCc_C160SN SCc_KAS16 SCc_C140SN)
SCc_436	lethal	lethal	(SCc_UAGAAT SCc_MCOATA)
SCc_437	lethal	lethal	(SCc_C120SN SCc_KAS16 SCc_C181SN SCc_KAS14 SCc_C140SN SCc_C160SN)
SCc_438	lethal	lethal	(SCc_ADCL)
SCc_439	lethal	lethal	(SCc_DTMPK)
SCc_442	lethal	lethal	(SCc_GLCpts)
SCc_444	lethal	lethal	(SCc_TMKr)
SCc_445	lethal	lethal	(SCc_NADH5)
SCc_448	lethal	lethal	(SCc_E4PD SCc_GAPD)
SCc_449	dispensable	dispensable	(SCc_ASNN)
SCc_457	lethal	lethal	(SCc_PGSA_SCc)
SCc_461	lethal	lethal	(SCc_RNDR3 SCc_RNDR2 SCc_RNDR1 SCc_RNDR4)
SCc_462	lethal	lethal	(SCc_RNDR3 SCc_RNDR2 SCc_RNDR1 SCc_RNDR4)
SCc_468	lethal	lethal	(SCc_APRAUR SCc_DHPPDA2)
SCc_469	lethal	lethal	(SCc_RBFSb)
SCc_471	lethal	lethal	(SCc_TMPKr)
SCc_472	lethal	lethal	(SCc_PGPP_SCc)
SCc_473	lethal	lethal	(SCc_DXPS)
SCc_474	lethal	lethal	(SCc_GRTT SCc_DMATT)
SCc_475	lethal	lethal	(SCc_HEMEOS)
SCc_476	lethal	lethal	(SCc_CYTBO3)
SCc_477	lethal	lethal	(SCc_CYTBO3)
SCc_478	lethal	lethal	(SCc_CYTBO3)
SCc_479	lethal	lethal	(SCc_CYTBO3)
SCc_491	lethal	lethal	(SCc_PERD)
SCc_493	lethal	lethal	(SCc_ACCOACr)
SCc_494	lethal	lethal	(SCc_DHFS)
SCc_497	dispensable	dispensable	(SCc_GLUPRT)
SCc_499	lethal	lethal	(SCc_ACKr)
SCc_500	lethal	lethal	(SCc_PTAr)
SCc_503	lethal	lethal	(SCc_C120SN SCc_C141SN SCc_C181SN SCc_C161SN SCc_C160SN SCc_C140SN)
SCc_504	lethal	lethal	(SCc_DHORD2)
SCc_508	lethal	lethal	(SCc_KDOCT2)
SCc_510	lethal	lethal	(SCc_TDSK)
SCc_511	lethal	lethal	(SCc_K2L4ALabc)
SCc_514	lethal	lethal	(SCc_CYTK1 SCc_UMPK)
SCc_515	lethal	lethal	(SCc_PSCVT)
SCc_516	lethal	lethal	(SCc_OHPBAT SCc_ADCS SCc_SDPTA)
SCc_520	lethal	lethal	(SCc_TRDR)
SCc_527	lethal	lethal	(SCc_UDCPDP)
SCc_528	lethal	lethal	(SCc_SERt)
SCc_529	dispensable	lethal	(SCc_GND)
SCc_536	dispensable	dispensable	(SCc_DCTPD)
SCc_538	lethal	lethal	(SCc_GTPCI)
SCc_543	lethal	lethal	(SCc_GLNabc)
SCc_544	lethal	lethal	(SCc_GLNabc)
SCc_545	lethal	lethal	(SCc_GLNabc)
SCc_548	lethal	lethal	(SCc_ASNt)
SCc_552	lethal	lethal	(SCc_DBTSr)
SCc_553	lethal	lethal	(SCc_BTS5)
SCc_554	lethal	lethal	(SCc_AMAOTr)
SCc_555	lethal	lethal	(SCc_GMPS2)
SCc_556	lethal	lethal	(SCc_IMPD)
SCc_561	lethal	lethal	(SCc_MECDPDH)
SCc_564	lethal	lethal	(SCc_NDPK2 SCc_NDPK5 SCc_NDPK1 SCc_NDPK8 SCc_NDPK4 SCc_NDPK3 SCc_NDPK7)
SCc_568	lethal	lethal	(SCc_GHMT2)
SCc_569	lethal	lethal	(SCc_NADS1)
SCc_570	dispensable	dispensable	(SCc_PRFGS)
SCc_572	lethal	lethal	(SCc_PDH)
SCc_573	lethal	lethal	(SCc_PDH)
SCc_574	lethal	lethal	(SCc_PDH)
SCc_587	lethal	lethal	(SCc_PASYN_SCc)
SCc_595	lethal	lethal	(SCc_GMHEPK SCc_GMHEPAT)
SCc_596	lethal	lethal	(SCc_DB4PS)
SCc_603	lethal	lethal	(SCc_UAGCVT)
SCc_610	lethal	lethal	(SCc_A5PISO)
SCc_614	lethal	lethal	(SCc_GLCpts)
SCc_616	lethal	lethal	(SCc_C181SN SCc_C141SN SCc_C160SN SCc_C140SN SCc_C120SN SCc_C161SN SCc_KAS14 SCc_MACPD SCc_KAS16)
SCc_617	lethal	lethal	(SCc_CHORS)
SCc_620	dispensable	dispensable	(SCc_FRUpts)
SCc_621	dispensable	dispensable	(SCc_FRUK)
SCc_622	dispensable	dispensable	(SCc_FRUpts)
SCc_625	lethal	lethal	(SCc_LYSt SCc_ARGt SCc_HISt)
SCc_627	lethal	lethal	(SCc_ASAD)
SCc_629	lethal	lethal	(SCc_FE2abc)
SCc_630	lethal	lethal	(SCc_FE2abc)
SCc_634	lethal	lethal	(SCc_PPTGS)
SCc_636	dispensable	lethal	(SCc_RPE)
SCc_638	lethal	lethal	(SCc_SHKK)
SCc_676	lethal	lethal	(SCc_TPI)
SCc_677	lethal	lethal	(SCc_SULabc)
SCc_678	dispensable	dispensable	(SCc_PFK)
SCc_680	lethal	lethal	(SCc_UPP3S)
SCc_681	lethal	lethal	(SCc_HMBS)
SCc_682	lethal	lethal	(SCc_DAPE)
SCc_706	lethal	lethal	(SCc_PAPSR SCc_RNDR1 SCc_TRDR)
SCc_711	lethal	lethal	(SCc_OMPDC)
SCc_712	lethal	lethal	(SCc_PIt)
SCc_718	dispensable	dispensable	(SCc_PRAGSr)
SCc_719	lethal	lethal	(SCc_UPPDC1)
SCc_720	dispensable	dispensable	(SCc_AMPMS2)
SCc_734	lethal	lethal	(SCc_PNTK)
SCc_736	lethal	lethal	(SCc_UAPGR)
SCc_737	lethal	lethal	(SCc_ACCOACr)
SCc_738	lethal	lethal	(SCc_ACCOACr)
SCc_762	lethal	lethal	(SCc_GK1)
SCc_768	lethal	lethal	(SCc_GLUR)
SCc_770	lethal	lethal	(SCc_ASPCT)

## Sheet: Double KO
Gene 1	Reaction encoded by gene 1	Gene 2	Reaction encoded by gene 2	FBA
BCc_114	Acetate kinase	BCc_131	Pyruvate dehydrogenase	lethal
BCc_114	Acetate kinase	BCc_132	Pyruvate dehydrogenase	lethal
BCc_115	Phosphotransacetylase	BCc_131	Pyruvate dehydrogenase	lethal
BCc_115	Phosphotransacetylase	BCc_132	Pyruvate dehydrogenase	lethal
SCc_028	dUTP diphosphatase	SCc_207	UMP kinase	lethal
SCc_620	D-fructose transport PTS	SCc_678	Phosphofructokinase	lethal
SCc_621	Fructose-1-phosphate kinase	SCc_678	Phosphofructokinase	lethal
SCc_622	D-fructose transport PTS	SCc_678	Phosphofructokinase	lethal
