# Supplementary material for: Determinism and Contingency Shape Metabolic Complementation in an Endosymbiotic Consortium
Source: Front Microbiol. 2017 Nov 22;8:2290. doi: 10.3389/fmicb.2017.02290 (PMC5702781; doi:10.3389/fmicb.2017.02290)
Supplement: Supplementary Table S5 — Results from in-silico reduction experiments. The table includes two sheets. The first sheet summarizes the results from the reduction experiments and the second sheet includes a table with a mapping between Enzyme Subsets and the reactions IDs. [file Table5.XLSX]

## Sheet: Reduction experiments summary
		Normalized Optimal Flux
GLRP ID *	% Gene Loss	Meta-biomass N.O.F.	Tryptophan N.O.F.	Tetrahydrofolate N.O.F.	Biotin N.O.F.
iBSCc Ancestor	0	100	100	100	100
iBSCc: KO ( SCc_SHK3Dr, SCc_ANS, BCc_TRPS3, BCc_DHFS, SCc_AOXSr2, BCc_BTS5 )	45.5882	99.9652	99.8041	71.3012	64.4003
KO ( SCc_SHK3Dr, SCc_CHORS, SCc_ANS, BCc_TRPS3, SCc_DHFS, SCc_AOXSr2, SCc_BTS5 )	50	99.9888	99.8041	93.2524	54.3739
KO ( SCc_SHK3Dr, SCc_CHORS, SCc_ANS, BCc_TRPS3, SCc_DHFS, BCc_AOXSr2, SCc_BTS5 )	50	99.9885	99.8041	93.2524	85.8671
KO ( SCc_SHK3Dr, SCc_CHORS, SCc_ANS, BCc_TRPS3, SCc_DHFS, SCc_AOXSr2, BCc_BTS5 )	50	99.9884	99.8041	93.2524	66.0396
KO ( SCc_SHK3Dr, SCc_CHORS, SCc_ANS, BCc_TRPS3, SCc_DHFS, BCc_AOXSr2, BCc_BTS5 )	50	99.9882	99.8041	93.2524	58.6592
KO ( SCc_SHK3Dr, SCc_CHORS, SCc_ANS, BCc_TRPS3, BCc_DHFS, SCc_AOXSr2, SCc_BTS5 )	50	99.9528	99.8041	63.2246	54.3739
KO ( SCc_SHK3Dr, SCc_CHORS, SCc_ANS, BCc_TRPS3, BCc_DHFS, BCc_AOXSr2, SCc_BTS5 )	50	99.9525	99.8041	63.2246	85.8671
KO ( SCc_SHK3Dr, SCc_CHORS, SCc_ANS, BCc_TRPS3, BCc_DHFS, SCc_AOXSr2, BCc_BTS5 )	50	99.9523	99.8041	63.2246	64.4003
KO ( SCc_SHK3Dr, SCc_CHORS, SCc_ANS, BCc_TRPS3, BCc_DHFS, BCc_AOXSr2, BCc_BTS5 )	50	99.9521	99.8041	63.2246	58.6592
KO ( SCc_SHK3Dr, SCc_CHORS, SCc_ANS, SCc_TRPS3, SCc_DHFS, SCc_AOXSr2, SCc_BTS5 )	50	99.9143	64.666	93.2524	54.3739
KO ( SCc_SHK3Dr, SCc_CHORS, SCc_ANS, SCc_TRPS3, SCc_DHFS, BCc_AOXSr2, SCc_BTS5 )	50	99.914	64.666	93.2524	85.8671
KO ( SCc_SHK3Dr, SCc_CHORS, SCc_ANS, SCc_TRPS3, SCc_DHFS, SCc_AOXSr2, BCc_BTS5 )	50	99.9139	64.666	93.2524	66.0396
KO ( SCc_SHK3Dr, SCc_CHORS, SCc_ANS, SCc_TRPS3, SCc_DHFS, BCc_AOXSr2, BCc_BTS5 )	50	99.9136	64.666	93.2524	58.6592
KO ( SCc_SHK3Dr, SCc_CHORS, SCc_ANS, SCc_TRPS3, BCc_DHFS, SCc_AOXSr2, SCc_BTS5 )	50	99.8783	64.666	63.2246	54.3739
KO ( SCc_SHK3Dr, SCc_CHORS, SCc_ANS, SCc_TRPS3, BCc_DHFS, BCc_AOXSr2, SCc_BTS5 )	50	99.878	64.666	63.2246	85.8671
KO ( SCc_SHK3Dr, SCc_CHORS, SCc_ANS, SCc_TRPS3, BCc_DHFS, SCc_AOXSr2, BCc_BTS5 )	50	99.8779	64.666	63.2246	64.4003
KO ( SCc_SHK3Dr, SCc_CHORS, SCc_ANS, SCc_TRPS3, BCc_DHFS, BCc_AOXSr2, BCc_BTS5 )	50	99.8777	64.666	63.2246	58.6592
KO ( BCc_SHK3Dr, BCc_CHORS, BCc_ANS, BCc_TRPS3, SCc_DHFS, SCc_AOXSr2, SCc_BTS5 )	50	99.6044	64.421	73.149	54.3739
KO ( BCc_SHK3Dr, BCc_CHORS, BCc_ANS, BCc_TRPS3, SCc_DHFS, BCc_AOXSr2, SCc_BTS5 )	50	99.6041	64.421	73.149	85.8671
KO ( BCc_SHK3Dr, BCc_CHORS, BCc_ANS, BCc_TRPS3, SCc_DHFS, SCc_AOXSr2, BCc_BTS5 )	50	99.6039	64.421	73.149	64.5949
KO ( BCc_SHK3Dr, BCc_CHORS, BCc_ANS, BCc_TRPS3, SCc_DHFS, BCc_AOXSr2, BCc_BTS5 )	50	99.6037	64.421	73.149	58.6592
KO ( BCc_SHK3Dr, BCc_CHORS, SCc_ANS, BCc_TRPS3, SCc_DHFS, SCc_AOXSr2, SCc_BTS5 )	50	99.5913	60.7398	73.149	54.3739
KO ( BCc_SHK3Dr, BCc_CHORS, SCc_ANS, BCc_TRPS3, SCc_DHFS, BCc_AOXSr2, SCc_BTS5 )	50	99.591	60.7398	73.149	85.8671
KO ( BCc_SHK3Dr, BCc_CHORS, SCc_ANS, BCc_TRPS3, SCc_DHFS, SCc_AOXSr2, BCc_BTS5 )	50	99.5908	60.7398	73.149	64.5949
KO ( BCc_SHK3Dr, BCc_CHORS, SCc_ANS, BCc_TRPS3, SCc_DHFS, BCc_AOXSr2, BCc_BTS5 )	50	99.5906	60.7398	73.149	58.6592
KO ( BCc_SHK3Dr, BCc_CHORS, BCc_ANS, BCc_TRPS3, BCc_DHFS, SCc_AOXSr2, SCc_BTS5 )	50	99.5878	64.421	63.8108	54.3739
KO ( BCc_SHK3Dr, BCc_CHORS, BCc_ANS, BCc_TRPS3, BCc_DHFS, BCc_AOXSr2, SCc_BTS5 )	50	99.5875	64.421	63.8108	85.8671
KO ( BCc_SHK3Dr, BCc_CHORS, BCc_ANS, BCc_TRPS3, BCc_DHFS, SCc_AOXSr2, BCc_BTS5 )	50	99.5874	64.421	63.8108	64.4003
KO ( BCc_SHK3Dr, BCc_CHORS, BCc_ANS, BCc_TRPS3, BCc_DHFS, BCc_AOXSr2, BCc_BTS5 )	50	99.5872	64.421	63.8108	58.6592
KO ( BCc_SHK3Dr, BCc_CHORS, SCc_ANS, BCc_TRPS3, BCc_DHFS, SCc_AOXSr2, SCc_BTS5 )	50	99.5747	60.7398	63.8108	54.3739
KO ( BCc_SHK3Dr, BCc_CHORS, SCc_ANS, BCc_TRPS3, BCc_DHFS, BCc_AOXSr2, SCc_BTS5 )	50	99.5744	60.7398	63.8108	85.8671
KO ( BCc_SHK3Dr, BCc_CHORS, SCc_ANS, BCc_TRPS3, BCc_DHFS, SCc_AOXSr2, BCc_BTS5 )	50	99.5743	60.7398	63.8108	64.4003
KO ( BCc_SHK3Dr, BCc_CHORS, SCc_ANS, BCc_TRPS3, BCc_DHFS, BCc_AOXSr2, BCc_BTS5 )	50	99.5741	60.7398	63.8108	58.6592
KO ( BCc_SHK3Dr, BCc_CHORS, SCc_ANS, SCc_TRPS3, SCc_DHFS, SCc_AOXSr2, SCc_BTS5 )	50	99.5173	75.163	73.149	54.3739
KO ( BCc_SHK3Dr, BCc_CHORS, SCc_ANS, SCc_TRPS3, SCc_DHFS, BCc_AOXSr2, SCc_BTS5 )	50	99.517	75.163	73.149	85.8671
KO ( BCc_SHK3Dr, BCc_CHORS, SCc_ANS, SCc_TRPS3, SCc_DHFS, SCc_AOXSr2, BCc_BTS5 )	50	99.5169	75.163	73.149	64.5949
KO ( BCc_SHK3Dr, BCc_CHORS, SCc_ANS, SCc_TRPS3, SCc_DHFS, BCc_AOXSr2, BCc_BTS5 )	50	99.5167	75.163	73.149	58.6592
KO ( BCc_SHK3Dr, BCc_CHORS, SCc_ANS, SCc_TRPS3, BCc_DHFS, SCc_AOXSr2, SCc_BTS5 )	50	99.5008	75.163	63.8108	54.3739
KO ( BCc_SHK3Dr, BCc_CHORS, SCc_ANS, SCc_TRPS3, BCc_DHFS, BCc_AOXSr2, SCc_BTS5 )	50	99.5005	75.163	63.8108	85.8671
KO ( BCc_SHK3Dr, BCc_CHORS, SCc_ANS, SCc_TRPS3, BCc_DHFS, SCc_AOXSr2, BCc_BTS5 )	50	99.5004	75.163	63.8108	64.4003
KO ( BCc_SHK3Dr, BCc_CHORS, SCc_ANS, SCc_TRPS3, BCc_DHFS, BCc_AOXSr2, BCc_BTS5 )	50	99.5002	75.163	63.8108	58.6592
KO ( SCc_SHK3Dr, SCc_CHORS, BCc_ANS, BCc_TRPS3, SCc_DHFS, SCc_AOXSr2, SCc_BTS5 )	50	99.4545	68.443	93.2524	54.3739
KO ( SCc_SHK3Dr, SCc_CHORS, BCc_ANS, BCc_TRPS3, SCc_DHFS, BCc_AOXSr2, SCc_BTS5 )	50	99.4542	68.443	93.2524	85.8671
KO ( SCc_SHK3Dr, SCc_CHORS, BCc_ANS, BCc_TRPS3, SCc_DHFS, SCc_AOXSr2, BCc_BTS5 )	50	99.4541	68.443	93.2524	66.0396
KO ( SCc_SHK3Dr, SCc_CHORS, BCc_ANS, BCc_TRPS3, SCc_DHFS, BCc_AOXSr2, BCc_BTS5 )	50	99.4539	68.443	93.2524	58.6592
KO ( SCc_SHK3Dr, SCc_CHORS, BCc_ANS, BCc_TRPS3, BCc_DHFS, SCc_AOXSr2, SCc_BTS5 )	50	99.4189	68.443	63.2246	54.3739
KO ( SCc_SHK3Dr, SCc_CHORS, BCc_ANS, BCc_TRPS3, BCc_DHFS, BCc_AOXSr2, SCc_BTS5 )	50	99.4186	68.443	63.2246	85.8671
KO ( SCc_SHK3Dr, SCc_CHORS, BCc_ANS, BCc_TRPS3, BCc_DHFS, SCc_AOXSr2, BCc_BTS5 )	50	99.4184	68.443	63.2246	64.4003
KO ( SCc_SHK3Dr, SCc_CHORS, BCc_ANS, BCc_TRPS3, BCc_DHFS, BCc_AOXSr2, BCc_BTS5 )	50	99.4182	68.443	63.2246	58.6592
KO ( BCc_SHK3Dr, BCc_CHORS, BCc_ANS, SCc_TRPS3, SCc_DHFS, SCc_AOXSr2, SCc_BTS5 )	50	99.1501	59.6414	73.149	54.3739
KO ( BCc_SHK3Dr, BCc_CHORS, BCc_ANS, SCc_TRPS3, SCc_DHFS, BCc_AOXSr2, SCc_BTS5 )	50	99.1498	58.8917	73.149	85.8671
KO ( BCc_SHK3Dr, BCc_CHORS, BCc_ANS, SCc_TRPS3, SCc_DHFS, SCc_AOXSr2, BCc_BTS5 )	50	99.1497	58.8917	73.149	64.5949
KO ( BCc_SHK3Dr, BCc_CHORS, BCc_ANS, SCc_TRPS3, SCc_DHFS, BCc_AOXSr2, BCc_BTS5 )	50	99.1495	58.8917	73.149	58.6592
KO ( BCc_SHK3Dr, BCc_CHORS, BCc_ANS, SCc_TRPS3, BCc_DHFS, SCc_AOXSr2, SCc_BTS5 )	50	99.1337	59.6414	63.8108	54.3739
KO ( BCc_SHK3Dr, BCc_CHORS, BCc_ANS, SCc_TRPS3, BCc_DHFS, BCc_AOXSr2, SCc_BTS5 )	50	99.1334	58.8917	63.8108	85.8671
KO ( BCc_SHK3Dr, BCc_CHORS, BCc_ANS, SCc_TRPS3, BCc_DHFS, SCc_AOXSr2, BCc_BTS5 )	50	99.1333	58.8917	63.8108	64.4003
KO ( BCc_SHK3Dr, BCc_CHORS, BCc_ANS, SCc_TRPS3, BCc_DHFS, BCc_AOXSr2, BCc_BTS5 )	50	99.1331	58.8917	63.8108	58.6592
KO ( SCc_SHK3Dr, SCc_CHORS, BCc_ANS, SCc_TRPS3, SCc_DHFS, SCc_AOXSr2, SCc_BTS5 )	50	99.0017	55.5082	93.2524	54.3739
KO ( SCc_SHK3Dr, SCc_CHORS, BCc_ANS, SCc_TRPS3, SCc_DHFS, BCc_AOXSr2, SCc_BTS5 )	50	99.0014	55.5082	93.2524	85.8671
KO ( SCc_SHK3Dr, SCc_CHORS, BCc_ANS, SCc_TRPS3, SCc_DHFS, SCc_AOXSr2, BCc_BTS5 )	50	99.0012	55.5082	93.2524	66.0396
KO ( SCc_SHK3Dr, SCc_CHORS, BCc_ANS, SCc_TRPS3, SCc_DHFS, BCc_AOXSr2, BCc_BTS5 )	50	99.001	55.5082	93.2524	58.6592
KO ( SCc_SHK3Dr, SCc_CHORS, BCc_ANS, SCc_TRPS3, BCc_DHFS, SCc_AOXSr2, SCc_BTS5 )	50	98.9663	55.5082	63.2246	54.3739
KO ( SCc_SHK3Dr, SCc_CHORS, BCc_ANS, SCc_TRPS3, BCc_DHFS, BCc_AOXSr2, SCc_BTS5 )	50	98.966	55.5082	63.2246	85.8671
KO ( SCc_SHK3Dr, SCc_CHORS, BCc_ANS, SCc_TRPS3, BCc_DHFS, SCc_AOXSr2, BCc_BTS5 )	50	98.9659	55.5082	63.2246	64.4003
KO ( SCc_SHK3Dr, SCc_CHORS, BCc_ANS, SCc_TRPS3, BCc_DHFS, BCc_AOXSr2, BCc_BTS5 )	50	98.9657	55.5082	63.2246	58.6592
KO ( SCc_SHK3Dr, BCc_CHORS, BCc_ANS, BCc_TRPS3, SCc_DHFS, SCc_AOXSr2, SCc_BTS5 )	50	98.3724	75.7557	86.2162	54.3739
KO ( SCc_SHK3Dr, BCc_CHORS, BCc_ANS, BCc_TRPS3, SCc_DHFS, BCc_AOXSr2, SCc_BTS5 )	50	98.3721	75.7557	86.2162	85.8671
KO ( SCc_SHK3Dr, BCc_CHORS, BCc_ANS, BCc_TRPS3, SCc_DHFS, SCc_AOXSr2, BCc_BTS5 )	50	98.372	75.7557	86.2162	64.4003
KO ( SCc_SHK3Dr, BCc_CHORS, BCc_ANS, BCc_TRPS3, SCc_DHFS, BCc_AOXSr2, BCc_BTS5 )	50	98.3717	75.7557	86.2162	58.6592
KO ( SCc_SHK3Dr, BCc_CHORS, SCc_ANS, BCc_TRPS3, SCc_DHFS, SCc_AOXSr2, SCc_BTS5 )	50	98.3596	75.2806	86.2162	54.3739
KO ( SCc_SHK3Dr, BCc_CHORS, SCc_ANS, BCc_TRPS3, SCc_DHFS, BCc_AOXSr2, SCc_BTS5 )	50	98.3593	75.2806	86.2162	85.8671
KO ( SCc_SHK3Dr, BCc_CHORS, SCc_ANS, BCc_TRPS3, SCc_DHFS, SCc_AOXSr2, BCc_BTS5 )	50	98.3592	75.2806	86.2162	64.4003
KO ( SCc_SHK3Dr, BCc_CHORS, SCc_ANS, BCc_TRPS3, SCc_DHFS, BCc_AOXSr2, BCc_BTS5 )	50	98.359	75.2806	86.2162	58.6592
KO ( SCc_SHK3Dr, BCc_CHORS, BCc_ANS, BCc_TRPS3, BCc_DHFS, SCc_AOXSr2, SCc_BTS5 )	50	98.3562	75.7557	71.3012	54.3739
KO ( SCc_SHK3Dr, BCc_CHORS, BCc_ANS, BCc_TRPS3, BCc_DHFS, BCc_AOXSr2, SCc_BTS5 )	50	98.3559	75.7557	71.3012	85.8671
KO ( SCc_SHK3Dr, BCc_CHORS, BCc_ANS, BCc_TRPS3, BCc_DHFS, SCc_AOXSr2, BCc_BTS5 )	50	98.3558	75.7557	71.3012	64.4003
KO ( SCc_SHK3Dr, BCc_CHORS, BCc_ANS, BCc_TRPS3, BCc_DHFS, BCc_AOXSr2, BCc_BTS5 )	50	98.3556	75.7557	71.3012	58.6592
KO ( SCc_SHK3Dr, BCc_CHORS, SCc_ANS, BCc_TRPS3, BCc_DHFS, SCc_AOXSr2, SCc_BTS5 )	50	98.3434	75.2806	71.3012	54.3739
KO ( SCc_SHK3Dr, BCc_CHORS, SCc_ANS, BCc_TRPS3, BCc_DHFS, BCc_AOXSr2, SCc_BTS5 )	50	98.3432	75.2806	71.3012	85.8671
KO ( SCc_SHK3Dr, BCc_CHORS, SCc_ANS, BCc_TRPS3, BCc_DHFS, SCc_AOXSr2, BCc_BTS5 )	50	98.343	75.2806	71.3012	64.4003
KO ( SCc_SHK3Dr, BCc_CHORS, SCc_ANS, BCc_TRPS3, BCc_DHFS, BCc_AOXSr2, BCc_BTS5 )	50	98.3428	75.2806	71.3012	58.6592
KO ( SCc_SHK3Dr, BCc_CHORS, SCc_ANS, SCc_TRPS3, SCc_DHFS, SCc_AOXSr2, SCc_BTS5 )	50	98.2875	63.3807	86.2162	54.3739
KO ( SCc_SHK3Dr, BCc_CHORS, SCc_ANS, SCc_TRPS3, SCc_DHFS, BCc_AOXSr2, SCc_BTS5 )	50	98.2872	63.3807	86.2162	85.8671
KO ( SCc_SHK3Dr, BCc_CHORS, SCc_ANS, SCc_TRPS3, SCc_DHFS, SCc_AOXSr2, BCc_BTS5 )	50	98.287	63.3807	86.2162	64.4003
KO ( SCc_SHK3Dr, BCc_CHORS, SCc_ANS, SCc_TRPS3, SCc_DHFS, BCc_AOXSr2, BCc_BTS5 )	50	98.2868	63.3807	86.2162	58.6592
KO ( SCc_SHK3Dr, BCc_CHORS, SCc_ANS, SCc_TRPS3, BCc_DHFS, SCc_AOXSr2, SCc_BTS5 )	50	98.2713	63.3807	71.3012	54.3739
KO ( SCc_SHK3Dr, BCc_CHORS, SCc_ANS, SCc_TRPS3, BCc_DHFS, BCc_AOXSr2, SCc_BTS5 )	50	98.2711	63.3807	71.3012	85.8671
KO ( SCc_SHK3Dr, BCc_CHORS, SCc_ANS, SCc_TRPS3, BCc_DHFS, SCc_AOXSr2, BCc_BTS5 )	50	98.2709	63.3807	71.3012	64.4003
KO ( SCc_SHK3Dr, BCc_CHORS, SCc_ANS, SCc_TRPS3, BCc_DHFS, BCc_AOXSr2, BCc_BTS5 )	50	98.2707	63.3807	71.3012	58.6592
KO ( SCc_SHK3Dr, BCc_CHORS, BCc_ANS, SCc_TRPS3, SCc_DHFS, SCc_AOXSr2, SCc_BTS5 )	50	97.9293	68.0949	86.2162	54.3739
KO ( SCc_SHK3Dr, BCc_CHORS, BCc_ANS, SCc_TRPS3, SCc_DHFS, BCc_AOXSr2, SCc_BTS5 )	50	97.929	68.0949	86.2162	85.8671
KO ( SCc_SHK3Dr, BCc_CHORS, BCc_ANS, SCc_TRPS3, SCc_DHFS, SCc_AOXSr2, BCc_BTS5 )	50	97.9289	68.0949	86.2162	64.4003
KO ( SCc_SHK3Dr, BCc_CHORS, BCc_ANS, SCc_TRPS3, SCc_DHFS, BCc_AOXSr2, BCc_BTS5 )	50	97.9287	68.0949	86.2162	58.6592
KO ( SCc_SHK3Dr, BCc_CHORS, BCc_ANS, SCc_TRPS3, BCc_DHFS, SCc_AOXSr2, SCc_BTS5 )	50	97.9133	68.0949	71.3012	54.3739
KO ( SCc_SHK3Dr, BCc_CHORS, BCc_ANS, SCc_TRPS3, BCc_DHFS, BCc_AOXSr2, SCc_BTS5 )	50	97.913	68.0949	71.3012	85.8671
KO ( SCc_SHK3Dr, BCc_CHORS, BCc_ANS, SCc_TRPS3, BCc_DHFS, SCc_AOXSr2, BCc_BTS5 )	50	97.9129	68.0949	71.3012	64.4003
KO ( SCc_SHK3Dr, BCc_CHORS, BCc_ANS, SCc_TRPS3, BCc_DHFS, BCc_AOXSr2, BCc_BTS5 )	50	97.9127	68.0949	71.3012	58.6592
KO ( BCc_SHK3Dr, SCc_CHORS, SCc_ANS, BCc_TRPS3, SCc_DHFS, SCc_AOXSr2, SCc_BTS5 )	50	97.8605	65.7951	79.4608	54.3739
KO ( BCc_SHK3Dr, SCc_CHORS, SCc_ANS, BCc_TRPS3, SCc_DHFS, BCc_AOXSr2, SCc_BTS5 )	50	97.8602	65.7951	79.4608	85.8671
KO ( BCc_SHK3Dr, SCc_CHORS, SCc_ANS, BCc_TRPS3, SCc_DHFS, SCc_AOXSr2, BCc_BTS5 )	50	97.8601	65.7951	79.4608	65.4447
KO ( BCc_SHK3Dr, SCc_CHORS, SCc_ANS, BCc_TRPS3, SCc_DHFS, BCc_AOXSr2, BCc_BTS5 )	50	97.8599	65.7951	79.4608	58.6592
KO ( BCc_SHK3Dr, SCc_CHORS, SCc_ANS, BCc_TRPS3, BCc_DHFS, SCc_AOXSr2, SCc_BTS5 )	50	97.826	65.7951	53.3624	54.3739
KO ( BCc_SHK3Dr, SCc_CHORS, SCc_ANS, BCc_TRPS3, BCc_DHFS, BCc_AOXSr2, SCc_BTS5 )	50	97.8257	65.7951	53.3624	85.8671
KO ( BCc_SHK3Dr, SCc_CHORS, SCc_ANS, BCc_TRPS3, BCc_DHFS, SCc_AOXSr2, BCc_BTS5 )	50	97.8256	65.7951	53.3624	64.4003
KO ( BCc_SHK3Dr, SCc_CHORS, SCc_ANS, BCc_TRPS3, BCc_DHFS, BCc_AOXSr2, BCc_BTS5 )	50	97.8254	65.7951	53.3624	58.6592
KO ( BCc_SHK3Dr, SCc_CHORS, SCc_ANS, SCc_TRPS3, SCc_DHFS, SCc_AOXSr2, SCc_BTS5 )	50	97.7891	69.3226	79.4608	54.3739
KO ( BCc_SHK3Dr, SCc_CHORS, SCc_ANS, SCc_TRPS3, SCc_DHFS, BCc_AOXSr2, SCc_BTS5 )	50	97.7888	69.3226	79.4608	85.8671
KO ( BCc_SHK3Dr, SCc_CHORS, SCc_ANS, SCc_TRPS3, SCc_DHFS, SCc_AOXSr2, BCc_BTS5 )	50	97.7887	69.3226	79.4608	65.4447
KO ( BCc_SHK3Dr, SCc_CHORS, SCc_ANS, SCc_TRPS3, SCc_DHFS, BCc_AOXSr2, BCc_BTS5 )	50	97.7885	69.3226	79.4608	58.6592
KO ( BCc_SHK3Dr, SCc_CHORS, SCc_ANS, SCc_TRPS3, BCc_DHFS, SCc_AOXSr2, SCc_BTS5 )	50	97.7546	69.3226	53.3624	54.3739
KO ( BCc_SHK3Dr, SCc_CHORS, SCc_ANS, SCc_TRPS3, BCc_DHFS, BCc_AOXSr2, SCc_BTS5 )	50	97.7543	69.3226	53.3624	85.8671
KO ( BCc_SHK3Dr, SCc_CHORS, SCc_ANS, SCc_TRPS3, BCc_DHFS, SCc_AOXSr2, BCc_BTS5 )	50	97.7542	69.3226	53.3624	64.4003
KO ( BCc_SHK3Dr, SCc_CHORS, SCc_ANS, SCc_TRPS3, BCc_DHFS, BCc_AOXSr2, BCc_BTS5 )	50	97.754	69.3226	53.3624	58.6592
KO ( BCc_SHK3Dr, SCc_CHORS, BCc_ANS, BCc_TRPS3, SCc_DHFS, SCc_AOXSr2, SCc_BTS5 )	50	97.3486	50.3734	79.4608	54.3739
KO ( BCc_SHK3Dr, SCc_CHORS, BCc_ANS, BCc_TRPS3, SCc_DHFS, BCc_AOXSr2, SCc_BTS5 )	50	97.3484	50.3734	79.4608	85.8671
KO ( BCc_SHK3Dr, SCc_CHORS, BCc_ANS, BCc_TRPS3, SCc_DHFS, SCc_AOXSr2, BCc_BTS5 )	50	97.3482	50.3734	79.4608	65.4447
KO ( BCc_SHK3Dr, SCc_CHORS, BCc_ANS, BCc_TRPS3, SCc_DHFS, BCc_AOXSr2, BCc_BTS5 )	50	97.348	50.3734	79.4608	58.6592
KO ( BCc_SHK3Dr, SCc_CHORS, BCc_ANS, BCc_TRPS3, BCc_DHFS, SCc_AOXSr2, SCc_BTS5 )	50	97.3145	50.3734	53.3624	54.3739
KO ( BCc_SHK3Dr, SCc_CHORS, BCc_ANS, BCc_TRPS3, BCc_DHFS, BCc_AOXSr2, SCc_BTS5 )	50	97.3142	50.3734	53.3624	85.8671
KO ( BCc_SHK3Dr, SCc_CHORS, BCc_ANS, BCc_TRPS3, BCc_DHFS, SCc_AOXSr2, BCc_BTS5 )	50	97.3141	50.3734	53.3624	64.4003
KO ( BCc_SHK3Dr, SCc_CHORS, BCc_ANS, BCc_TRPS3, BCc_DHFS, BCc_AOXSr2, BCc_BTS5 )	50	97.3139	50.3734	53.3624	58.6592
KO ( BCc_SHK3Dr, SCc_CHORS, BCc_ANS, SCc_TRPS3, SCc_DHFS, SCc_AOXSr2, SCc_BTS5 )	50	96.9147	47.9038	79.4608	54.3739
KO ( BCc_SHK3Dr, SCc_CHORS, BCc_ANS, SCc_TRPS3, SCc_DHFS, BCc_AOXSr2, SCc_BTS5 )	50	96.9144	47.9038	79.4608	85.8671
KO ( BCc_SHK3Dr, SCc_CHORS, BCc_ANS, SCc_TRPS3, SCc_DHFS, SCc_AOXSr2, BCc_BTS5 )	50	96.9143	47.9038	79.4608	65.4447
KO ( BCc_SHK3Dr, SCc_CHORS, BCc_ANS, SCc_TRPS3, SCc_DHFS, BCc_AOXSr2, BCc_BTS5 )	50	96.9141	47.9038	79.4608	58.6592
KO ( BCc_SHK3Dr, SCc_CHORS, BCc_ANS, SCc_TRPS3, BCc_DHFS, SCc_AOXSr2, SCc_BTS5 )	50	96.8808	47.9038	53.3624	54.3739
KO ( BCc_SHK3Dr, SCc_CHORS, BCc_ANS, SCc_TRPS3, BCc_DHFS, BCc_AOXSr2, SCc_BTS5 )	50	96.8806	47.9038	53.3624	85.8671
KO ( BCc_SHK3Dr, SCc_CHORS, BCc_ANS, SCc_TRPS3, BCc_DHFS, SCc_AOXSr2, BCc_BTS5 )	50	96.8804	47.9038	53.3624	64.4003
KO ( BCc_SHK3Dr, SCc_CHORS, BCc_ANS, SCc_TRPS3, BCc_DHFS, BCc_AOXSr2, BCc_BTS5 )	50	96.8802	47.9038	53.3624	58.6592
KO ( SCc_SHK3Dr, SCc_CHORS, BCc_TRPS3, SCc_DHFS, SCc_AOXSr2, SCc_BTS5 )	47.0588	99.9888	99.8041	93.2524	54.3739
KO ( SCc_SHK3Dr, SCc_CHORS, BCc_TRPS3, SCc_DHFS, BCc_AOXSr2, SCc_BTS5 )	47.0588	99.9885	99.8041	93.2524	85.8671
KO ( SCc_SHK3Dr, SCc_CHORS, BCc_TRPS3, SCc_DHFS, SCc_AOXSr2, BCc_BTS5 )	47.0588	99.9884	99.8041	93.2524	66.0396
KO ( SCc_SHK3Dr, SCc_CHORS, BCc_TRPS3, SCc_DHFS, BCc_AOXSr2, BCc_BTS5 )	47.0588	99.9882	99.8041	93.2524	58.6592
KO ( SCc_SHK3Dr, SCc_CHORS, BCc_TRPS3, BCc_DHFS, SCc_AOXSr2, SCc_BTS5 )	47.0588	99.9528	99.8041	63.2246	54.3739
KO ( SCc_SHK3Dr, SCc_CHORS, BCc_TRPS3, BCc_DHFS, BCc_AOXSr2, SCc_BTS5 )	47.0588	99.9525	99.8041	63.2246	85.8671
KO ( SCc_SHK3Dr, SCc_CHORS, BCc_TRPS3, BCc_DHFS, SCc_AOXSr2, BCc_BTS5 )	47.0588	99.9523	99.8041	63.2246	64.4003
KO ( SCc_SHK3Dr, SCc_CHORS, BCc_TRPS3, BCc_DHFS, BCc_AOXSr2, BCc_BTS5 )	47.0588	99.9521	99.8041	63.2246	58.6592
KO ( SCc_SHK3Dr, SCc_CHORS, SCc_TRPS3, SCc_DHFS, SCc_AOXSr2, SCc_BTS5 )	47.0588	99.9143	64.666	93.2524	54.3739
KO ( SCc_SHK3Dr, SCc_CHORS, SCc_TRPS3, SCc_DHFS, BCc_AOXSr2, SCc_BTS5 )	47.0588	99.914	64.666	93.2524	85.8671
KO ( SCc_SHK3Dr, SCc_CHORS, SCc_TRPS3, SCc_DHFS, SCc_AOXSr2, BCc_BTS5 )	47.0588	99.9139	64.666	93.2524	66.0396
KO ( SCc_SHK3Dr, SCc_CHORS, SCc_TRPS3, SCc_DHFS, BCc_AOXSr2, BCc_BTS5 )	47.0588	99.9136	64.666	93.2524	58.6592
KO ( SCc_SHK3Dr, SCc_CHORS, SCc_TRPS3, BCc_DHFS, SCc_AOXSr2, SCc_BTS5 )	47.0588	99.8783	64.666	63.2246	54.3739
KO ( SCc_SHK3Dr, SCc_CHORS, SCc_TRPS3, BCc_DHFS, BCc_AOXSr2, SCc_BTS5 )	47.0588	99.878	64.666	63.2246	85.8671
KO ( SCc_SHK3Dr, SCc_CHORS, SCc_TRPS3, BCc_DHFS, SCc_AOXSr2, BCc_BTS5 )	47.0588	99.8779	64.666	63.2246	64.4003
KO ( SCc_SHK3Dr, SCc_CHORS, SCc_TRPS3, BCc_DHFS, BCc_AOXSr2, BCc_BTS5 )	47.0588	99.8777	64.666	63.2246	58.6592
KO ( BCc_SHK3Dr, BCc_CHORS, BCc_TRPS3, SCc_DHFS, SCc_AOXSr2, SCc_BTS5 )	47.0588	99.6044	64.421	73.149	54.3739
KO ( BCc_SHK3Dr, BCc_CHORS, BCc_TRPS3, SCc_DHFS, BCc_AOXSr2, SCc_BTS5 )	47.0588	99.6041	64.421	73.149	85.8671
KO ( BCc_SHK3Dr, BCc_CHORS, BCc_TRPS3, SCc_DHFS, SCc_AOXSr2, BCc_BTS5 )	47.0588	99.6039	64.421	73.149	64.5949
KO ( BCc_SHK3Dr, BCc_CHORS, BCc_TRPS3, SCc_DHFS, BCc_AOXSr2, BCc_BTS5 )	47.0588	99.6037	64.421	73.149	58.6592
KO ( BCc_SHK3Dr, BCc_CHORS, BCc_TRPS3, BCc_DHFS, SCc_AOXSr2, SCc_BTS5 )	47.0588	99.5878	64.421	63.8108	54.3739
KO ( BCc_SHK3Dr, BCc_CHORS, BCc_TRPS3, BCc_DHFS, BCc_AOXSr2, SCc_BTS5 )	47.0588	99.5875	64.421	63.8108	85.8671
KO ( BCc_SHK3Dr, BCc_CHORS, BCc_TRPS3, BCc_DHFS, SCc_AOXSr2, BCc_BTS5 )	47.0588	99.5874	64.421	63.8108	64.4003
KO ( BCc_SHK3Dr, BCc_CHORS, BCc_TRPS3, BCc_DHFS, BCc_AOXSr2, BCc_BTS5 )	47.0588	99.5872	64.421	63.8108	58.6592
KO ( BCc_SHK3Dr, BCc_CHORS, SCc_TRPS3, SCc_DHFS, SCc_AOXSr2, SCc_BTS5 )	47.0588	99.5173	75.163	73.149	54.3739
KO ( BCc_SHK3Dr, BCc_CHORS, SCc_TRPS3, SCc_DHFS, BCc_AOXSr2, SCc_BTS5 )	47.0588	99.517	75.163	73.149	85.8671
KO ( BCc_SHK3Dr, BCc_CHORS, SCc_TRPS3, SCc_DHFS, SCc_AOXSr2, BCc_BTS5 )	47.0588	99.5169	75.163	73.149	64.5949
KO ( BCc_SHK3Dr, BCc_CHORS, SCc_TRPS3, SCc_DHFS, BCc_AOXSr2, BCc_BTS5 )	47.0588	99.5167	75.163	73.149	58.6592
KO ( BCc_SHK3Dr, BCc_CHORS, SCc_TRPS3, BCc_DHFS, SCc_AOXSr2, SCc_BTS5 )	47.0588	99.5008	75.163	63.8108	54.3739
KO ( BCc_SHK3Dr, BCc_CHORS, SCc_TRPS3, BCc_DHFS, BCc_AOXSr2, SCc_BTS5 )	47.0588	99.5005	75.163	63.8108	85.8671
KO ( BCc_SHK3Dr, BCc_CHORS, SCc_TRPS3, BCc_DHFS, SCc_AOXSr2, BCc_BTS5 )	47.0588	99.5004	75.163	63.8108	64.4003
KO ( BCc_SHK3Dr, BCc_CHORS, SCc_TRPS3, BCc_DHFS, BCc_AOXSr2, BCc_BTS5 )	47.0588	99.5002	75.163	63.8108	58.6592
KO ( SCc_SHK3Dr, BCc_CHORS, BCc_TRPS3, SCc_DHFS, SCc_AOXSr2, SCc_BTS5 )	47.0588	98.3724	75.7557	86.2162	54.3739
KO ( SCc_SHK3Dr, BCc_CHORS, BCc_TRPS3, SCc_DHFS, BCc_AOXSr2, SCc_BTS5 )	47.0588	98.3721	75.7557	86.2162	85.8671
KO ( SCc_SHK3Dr, BCc_CHORS, BCc_TRPS3, SCc_DHFS, SCc_AOXSr2, BCc_BTS5 )	47.0588	98.372	75.7557	86.2162	64.4003
KO ( SCc_SHK3Dr, BCc_CHORS, BCc_TRPS3, SCc_DHFS, BCc_AOXSr2, BCc_BTS5 )	47.0588	98.3717	75.7557	86.2162	58.6592
KO ( SCc_SHK3Dr, BCc_CHORS, BCc_TRPS3, BCc_DHFS, SCc_AOXSr2, SCc_BTS5 )	47.0588	98.3562	75.7557	71.3012	54.3739
KO ( SCc_SHK3Dr, BCc_CHORS, BCc_TRPS3, BCc_DHFS, BCc_AOXSr2, SCc_BTS5 )	47.0588	98.3559	75.7557	71.3012	85.8671
KO ( SCc_SHK3Dr, BCc_CHORS, BCc_TRPS3, BCc_DHFS, SCc_AOXSr2, BCc_BTS5 )	47.0588	98.3558	75.7557	71.3012	64.4003
KO ( SCc_SHK3Dr, BCc_CHORS, BCc_TRPS3, BCc_DHFS, BCc_AOXSr2, BCc_BTS5 )	47.0588	98.3556	75.7557	71.3012	58.6592
KO ( SCc_SHK3Dr, BCc_CHORS, SCc_TRPS3, SCc_DHFS, SCc_AOXSr2, SCc_BTS5 )	47.0588	98.2875	70.5483	86.2162	54.3739
KO ( SCc_SHK3Dr, BCc_CHORS, SCc_TRPS3, SCc_DHFS, BCc_AOXSr2, SCc_BTS5 )	47.0588	98.2872	70.5483	86.2162	85.8671
KO ( SCc_SHK3Dr, BCc_CHORS, SCc_TRPS3, SCc_DHFS, SCc_AOXSr2, BCc_BTS5 )	47.0588	98.287	70.5483	86.2162	64.4003
KO ( SCc_SHK3Dr, BCc_CHORS, SCc_TRPS3, SCc_DHFS, BCc_AOXSr2, BCc_BTS5 )	47.0588	98.2868	70.5483	86.2162	58.6592
KO ( SCc_SHK3Dr, BCc_CHORS, SCc_TRPS3, BCc_DHFS, SCc_AOXSr2, SCc_BTS5 )	47.0588	98.2713	70.5483	71.3012	54.3739
KO ( SCc_SHK3Dr, BCc_CHORS, SCc_TRPS3, BCc_DHFS, BCc_AOXSr2, SCc_BTS5 )	47.0588	98.2711	70.5483	71.3012	85.8671
KO ( SCc_SHK3Dr, BCc_CHORS, SCc_TRPS3, BCc_DHFS, SCc_AOXSr2, BCc_BTS5 )	47.0588	98.2709	70.5483	71.3012	64.4003
KO ( SCc_SHK3Dr, BCc_CHORS, SCc_TRPS3, BCc_DHFS, BCc_AOXSr2, BCc_BTS5 )	47.0588	98.2707	70.5483	71.3012	58.6592
KO ( BCc_SHK3Dr, SCc_CHORS, BCc_TRPS3, SCc_DHFS, SCc_AOXSr2, SCc_BTS5 )	47.0588	97.8605	65.7951	79.4608	54.3739
KO ( BCc_SHK3Dr, SCc_CHORS, BCc_TRPS3, SCc_DHFS, BCc_AOXSr2, SCc_BTS5 )	47.0588	97.8602	65.7951	79.4608	85.8671
KO ( BCc_SHK3Dr, SCc_CHORS, BCc_TRPS3, SCc_DHFS, SCc_AOXSr2, BCc_BTS5 )	47.0588	97.8601	65.7951	79.4608	65.4447
KO ( BCc_SHK3Dr, SCc_CHORS, BCc_TRPS3, SCc_DHFS, BCc_AOXSr2, BCc_BTS5 )	47.0588	97.8599	65.7951	79.4608	58.6592
KO ( BCc_SHK3Dr, SCc_CHORS, BCc_TRPS3, BCc_DHFS, SCc_AOXSr2, SCc_BTS5 )	47.0588	97.826	65.7951	53.3624	54.3739
KO ( BCc_SHK3Dr, SCc_CHORS, BCc_TRPS3, BCc_DHFS, BCc_AOXSr2, SCc_BTS5 )	47.0588	97.8257	65.7951	53.3624	85.8671
KO ( BCc_SHK3Dr, SCc_CHORS, BCc_TRPS3, BCc_DHFS, SCc_AOXSr2, BCc_BTS5 )	47.0588	97.8256	65.7951	53.3624	64.4003
KO ( BCc_SHK3Dr, SCc_CHORS, BCc_TRPS3, BCc_DHFS, BCc_AOXSr2, BCc_BTS5 )	47.0588	97.8254	65.7951	53.3624	58.6592
KO ( BCc_SHK3Dr, SCc_CHORS, SCc_TRPS3, SCc_DHFS, SCc_AOXSr2, SCc_BTS5 )	47.0588	97.7891	69.3226	79.4608	54.3739
KO ( BCc_SHK3Dr, SCc_CHORS, SCc_TRPS3, SCc_DHFS, BCc_AOXSr2, SCc_BTS5 )	47.0588	97.7888	69.3226	79.4608	85.8671
KO ( BCc_SHK3Dr, SCc_CHORS, SCc_TRPS3, SCc_DHFS, SCc_AOXSr2, BCc_BTS5 )	47.0588	97.7887	69.3226	79.4608	65.4447
KO ( BCc_SHK3Dr, SCc_CHORS, SCc_TRPS3, SCc_DHFS, BCc_AOXSr2, BCc_BTS5 )	47.0588	97.7885	69.3226	79.4608	58.6592
KO ( BCc_SHK3Dr, SCc_CHORS, SCc_TRPS3, BCc_DHFS, SCc_AOXSr2, SCc_BTS5 )	47.0588	97.7546	69.3226	53.3624	54.3739
KO ( BCc_SHK3Dr, SCc_CHORS, SCc_TRPS3, BCc_DHFS, BCc_AOXSr2, SCc_BTS5 )	47.0588	97.7543	69.3226	53.3624	85.8671
KO ( BCc_SHK3Dr, SCc_CHORS, SCc_TRPS3, BCc_DHFS, SCc_AOXSr2, BCc_BTS5 )	47.0588	97.7542	69.3226	53.3624	64.4003
KO ( BCc_SHK3Dr, SCc_CHORS, SCc_TRPS3, BCc_DHFS, BCc_AOXSr2, BCc_BTS5 )	47.0588	97.754	69.3226	53.3624	58.6592
KO ( SCc_SHK3Dr, SCc_ANS, BCc_TRPS3, SCc_DHFS, SCc_AOXSr2, SCc_BTS5 )	45.5882	99.9888	99.8041	93.2524	54.3739
KO ( SCc_SHK3Dr, SCc_ANS, BCc_TRPS3, SCc_DHFS, BCc_AOXSr2, SCc_BTS5 )	45.5882	99.9885	99.8041	93.2524	85.8671
KO ( SCc_SHK3Dr, SCc_ANS, BCc_TRPS3, SCc_DHFS, SCc_AOXSr2, BCc_BTS5 )	45.5882	99.9884	99.8041	93.2524	66.0396
KO ( SCc_SHK3Dr, SCc_ANS, BCc_TRPS3, SCc_DHFS, BCc_AOXSr2, BCc_BTS5 )	45.5882	99.9882	99.8041	93.2524	58.6592
KO ( SCc_SHK3Dr, SCc_ANS, BCc_TRPS3, BCc_DHFS, SCc_AOXSr2, SCc_BTS5 )	45.5882	99.9656	99.8041	71.3012	54.3739
KO ( SCc_SHK3Dr, SCc_ANS, BCc_TRPS3, BCc_DHFS, BCc_AOXSr2, SCc_BTS5 )	45.5882	99.9653	99.8041	71.3012	85.8671
KO ( SCc_SHK3Dr, SCc_ANS, BCc_TRPS3, BCc_DHFS, BCc_AOXSr2, BCc_BTS5 )	45.5882	99.965	99.8041	71.3012	58.6592
KO ( SCc_SHK3Dr, SCc_ANS, SCc_TRPS3, SCc_DHFS, SCc_AOXSr2, SCc_BTS5 )	45.5882	99.9143	64.666	93.2524	54.3739
KO ( SCc_SHK3Dr, SCc_ANS, SCc_TRPS3, SCc_DHFS, BCc_AOXSr2, SCc_BTS5 )	45.5882	99.914	64.666	93.2524	85.8671
KO ( SCc_SHK3Dr, SCc_ANS, SCc_TRPS3, SCc_DHFS, SCc_AOXSr2, BCc_BTS5 )	45.5882	99.9139	64.666	93.2524	66.0396
KO ( SCc_SHK3Dr, SCc_ANS, SCc_TRPS3, SCc_DHFS, BCc_AOXSr2, BCc_BTS5 )	45.5882	99.9136	64.666	93.2524	58.6592
KO ( SCc_SHK3Dr, SCc_ANS, SCc_TRPS3, BCc_DHFS, SCc_AOXSr2, SCc_BTS5 )	45.5882	99.8911	64.666	71.3012	54.3739
KO ( SCc_SHK3Dr, SCc_ANS, SCc_TRPS3, BCc_DHFS, BCc_AOXSr2, SCc_BTS5 )	45.5882	99.8908	64.666	71.3012	85.8671
KO ( SCc_SHK3Dr, SCc_ANS, SCc_TRPS3, BCc_DHFS, SCc_AOXSr2, BCc_BTS5 )	45.5882	99.8907	64.666	71.3012	64.4003
KO ( SCc_SHK3Dr, SCc_ANS, SCc_TRPS3, BCc_DHFS, BCc_AOXSr2, BCc_BTS5 )	45.5882	99.8905	64.666	71.3012	58.6592
KO ( SCc_SHK3Dr, BCc_ANS, BCc_TRPS3, SCc_DHFS, SCc_AOXSr2, SCc_BTS5 )	45.5882	99.8164	75.7557	93.2524	54.3739
KO ( SCc_SHK3Dr, BCc_ANS, BCc_TRPS3, SCc_DHFS, BCc_AOXSr2, SCc_BTS5 )	45.5882	99.8161	75.7557	93.2524	85.8671
KO ( SCc_SHK3Dr, BCc_ANS, BCc_TRPS3, SCc_DHFS, SCc_AOXSr2, BCc_BTS5 )	45.5882	99.816	75.7557	93.2524	66.0396
KO ( SCc_SHK3Dr, BCc_ANS, BCc_TRPS3, SCc_DHFS, BCc_AOXSr2, BCc_BTS5 )	45.5882	99.8158	75.7557	93.2524	58.6592
KO ( SCc_SHK3Dr, BCc_ANS, BCc_TRPS3, BCc_DHFS, SCc_AOXSr2, SCc_BTS5 )	45.5882	99.7932	75.7557	71.3012	54.3739
KO ( SCc_SHK3Dr, BCc_ANS, BCc_TRPS3, BCc_DHFS, BCc_AOXSr2, SCc_BTS5 )	45.5882	99.793	75.7557	71.3012	85.8671
KO ( SCc_SHK3Dr, BCc_ANS, BCc_TRPS3, BCc_DHFS, SCc_AOXSr2, BCc_BTS5 )	45.5882	99.7928	75.7557	71.3012	64.4003
KO ( SCc_SHK3Dr, BCc_ANS, BCc_TRPS3, BCc_DHFS, BCc_AOXSr2, BCc_BTS5 )	45.5882	99.7926	75.7557	71.3012	58.6592
KO ( BCc_SHK3Dr, BCc_ANS, BCc_TRPS3, SCc_DHFS, SCc_AOXSr2, SCc_BTS5 )	45.5882	99.6044	64.421	79.4608	54.3739
KO ( BCc_SHK3Dr, BCc_ANS, BCc_TRPS3, SCc_DHFS, BCc_AOXSr2, SCc_BTS5 )	45.5882	99.6041	64.421	79.4608	85.8671
KO ( BCc_SHK3Dr, BCc_ANS, BCc_TRPS3, SCc_DHFS, SCc_AOXSr2, BCc_BTS5 )	45.5882	99.6039	64.421	79.4608	65.4447
KO ( BCc_SHK3Dr, BCc_ANS, BCc_TRPS3, SCc_DHFS, BCc_AOXSr2, BCc_BTS5 )	45.5882	99.6037	64.421	79.4608	58.6592
KO ( BCc_SHK3Dr, SCc_ANS, BCc_TRPS3, SCc_DHFS, SCc_AOXSr2, SCc_BTS5 )	45.5882	99.5913	65.7951	79.4608	54.3739
KO ( BCc_SHK3Dr, SCc_ANS, BCc_TRPS3, SCc_DHFS, BCc_AOXSr2, SCc_BTS5 )	45.5882	99.591	65.7951	79.4608	85.8671
KO ( BCc_SHK3Dr, SCc_ANS, BCc_TRPS3, SCc_DHFS, SCc_AOXSr2, BCc_BTS5 )	45.5882	99.5908	65.7951	79.4608	65.4447
KO ( BCc_SHK3Dr, SCc_ANS, BCc_TRPS3, SCc_DHFS, BCc_AOXSr2, BCc_BTS5 )	45.5882	99.5906	65.7951	79.4608	58.6592
KO ( BCc_SHK3Dr, BCc_ANS, BCc_TRPS3, BCc_DHFS, SCc_AOXSr2, SCc_BTS5 )	45.5882	99.5878	64.421	63.8108	54.3739
KO ( BCc_SHK3Dr, BCc_ANS, BCc_TRPS3, BCc_DHFS, BCc_AOXSr2, SCc_BTS5 )	45.5882	99.5875	64.421	63.8108	85.8671
KO ( BCc_SHK3Dr, BCc_ANS, BCc_TRPS3, BCc_DHFS, SCc_AOXSr2, BCc_BTS5 )	45.5882	99.5874	64.421	63.8108	64.4003
KO ( BCc_SHK3Dr, BCc_ANS, BCc_TRPS3, BCc_DHFS, BCc_AOXSr2, BCc_BTS5 )	45.5882	99.5872	64.421	63.8108	58.6592
KO ( BCc_SHK3Dr, SCc_ANS, BCc_TRPS3, BCc_DHFS, SCc_AOXSr2, SCc_BTS5 )	45.5882	99.5747	65.7951	63.8108	54.3739
KO ( BCc_SHK3Dr, SCc_ANS, BCc_TRPS3, BCc_DHFS, BCc_AOXSr2, SCc_BTS5 )	45.5882	99.5744	65.7951	63.8108	85.8671
KO ( BCc_SHK3Dr, SCc_ANS, BCc_TRPS3, BCc_DHFS, SCc_AOXSr2, BCc_BTS5 )	45.5882	99.5743	65.7951	63.8108	64.4003
KO ( BCc_SHK3Dr, SCc_ANS, BCc_TRPS3, BCc_DHFS, BCc_AOXSr2, BCc_BTS5 )	45.5882	99.5741	65.7951	63.8108	58.6592
KO ( BCc_SHK3Dr, SCc_ANS, SCc_TRPS3, SCc_DHFS, SCc_AOXSr2, SCc_BTS5 )	45.5882	99.5173	75.922	79.4608	54.3739
KO ( BCc_SHK3Dr, SCc_ANS, SCc_TRPS3, SCc_DHFS, BCc_AOXSr2, SCc_BTS5 )	45.5882	99.517	75.922	79.4608	85.8671
KO ( BCc_SHK3Dr, SCc_ANS, SCc_TRPS3, SCc_DHFS, SCc_AOXSr2, BCc_BTS5 )	45.5882	99.5169	75.922	79.4608	65.4447
KO ( BCc_SHK3Dr, SCc_ANS, SCc_TRPS3, SCc_DHFS, BCc_AOXSr2, BCc_BTS5 )	45.5882	99.5167	75.922	79.4608	58.6592
KO ( BCc_SHK3Dr, SCc_ANS, SCc_TRPS3, BCc_DHFS, SCc_AOXSr2, SCc_BTS5 )	45.5882	99.5008	75.922	63.8108	54.3739
KO ( BCc_SHK3Dr, SCc_ANS, SCc_TRPS3, BCc_DHFS, BCc_AOXSr2, SCc_BTS5 )	45.5882	99.5005	75.922	63.8108	85.8671
KO ( BCc_SHK3Dr, SCc_ANS, SCc_TRPS3, BCc_DHFS, SCc_AOXSr2, BCc_BTS5 )	45.5882	99.5004	75.922	63.8108	64.4003
KO ( BCc_SHK3Dr, SCc_ANS, SCc_TRPS3, BCc_DHFS, BCc_AOXSr2, BCc_BTS5 )	45.5882	99.5002	75.922	63.8108	58.6592
KO ( SCc_SHK3Dr, BCc_ANS, SCc_TRPS3, SCc_DHFS, SCc_AOXSr2, SCc_BTS5 )	45.5882	99.3602	68.0949	93.2524	54.3739
KO ( SCc_SHK3Dr, BCc_ANS, SCc_TRPS3, SCc_DHFS, BCc_AOXSr2, SCc_BTS5 )	45.5882	99.3599	68.0949	93.2524	85.8671
KO ( SCc_SHK3Dr, BCc_ANS, SCc_TRPS3, SCc_DHFS, SCc_AOXSr2, BCc_BTS5 )	45.5882	99.3598	68.0949	93.2524	66.0396
KO ( SCc_SHK3Dr, BCc_ANS, SCc_TRPS3, SCc_DHFS, BCc_AOXSr2, BCc_BTS5 )	45.5882	99.3596	68.0949	93.2524	58.6592
KO ( SCc_SHK3Dr, BCc_ANS, SCc_TRPS3, BCc_DHFS, SCc_AOXSr2, SCc_BTS5 )	45.5882	99.3373	68.0949	71.3012	54.3739
KO ( SCc_SHK3Dr, BCc_ANS, SCc_TRPS3, BCc_DHFS, BCc_AOXSr2, SCc_BTS5 )	45.5882	99.337	68.0949	71.3012	85.8671
KO ( SCc_SHK3Dr, BCc_ANS, SCc_TRPS3, BCc_DHFS, SCc_AOXSr2, BCc_BTS5 )	45.5882	99.3369	68.0949	71.3012	64.4003
KO ( SCc_SHK3Dr, BCc_ANS, SCc_TRPS3, BCc_DHFS, BCc_AOXSr2, BCc_BTS5 )	45.5882	99.3367	68.0949	71.3012	58.6592
KO ( BCc_SHK3Dr, BCc_ANS, SCc_TRPS3, SCc_DHFS, SCc_AOXSr2, SCc_BTS5 )	45.5882	99.1501	59.6414	79.4608	54.3739
KO ( BCc_SHK3Dr, BCc_ANS, SCc_TRPS3, SCc_DHFS, BCc_AOXSr2, SCc_BTS5 )	45.5882	99.1498	58.8917	79.4608	85.8671
KO ( BCc_SHK3Dr, BCc_ANS, SCc_TRPS3, SCc_DHFS, SCc_AOXSr2, BCc_BTS5 )	45.5882	99.1497	58.8917	79.4608	65.4447
KO ( BCc_SHK3Dr, BCc_ANS, SCc_TRPS3, SCc_DHFS, BCc_AOXSr2, BCc_BTS5 )	45.5882	99.1495	58.8917	79.4608	58.6592
KO ( BCc_SHK3Dr, BCc_ANS, SCc_TRPS3, BCc_DHFS, SCc_AOXSr2, SCc_BTS5 )	45.5882	99.1337	59.6414	63.8108	54.3739
KO ( BCc_SHK3Dr, BCc_ANS, SCc_TRPS3, BCc_DHFS, BCc_AOXSr2, SCc_BTS5 )	45.5882	99.1334	58.8917	63.8108	85.8671
KO ( BCc_SHK3Dr, BCc_ANS, SCc_TRPS3, BCc_DHFS, SCc_AOXSr2, BCc_BTS5 )	45.5882	99.1333	58.8917	63.8108	64.4003
KO ( BCc_SHK3Dr, BCc_ANS, SCc_TRPS3, BCc_DHFS, BCc_AOXSr2, BCc_BTS5 )	45.5882	99.1331	58.8917	63.8108	58.6592
KO ( SCc_CHORS, SCc_ANS, BCc_TRPS3, SCc_DHFS, SCc_AOXSr2, SCc_BTS5 )	44.1176	99.9888	99.8041	93.2524	54.3739
KO ( SCc_CHORS, SCc_ANS, BCc_TRPS3, SCc_DHFS, BCc_AOXSr2, SCc_BTS5 )	44.1176	99.9885	99.8041	93.2524	85.8671
KO ( SCc_CHORS, SCc_ANS, BCc_TRPS3, SCc_DHFS, SCc_AOXSr2, BCc_BTS5 )	44.1176	99.9884	99.8041	93.2524	66.0396
KO ( SCc_CHORS, SCc_ANS, BCc_TRPS3, SCc_DHFS, BCc_AOXSr2, BCc_BTS5 )	44.1176	99.9882	99.8041	93.2524	58.6592
KO ( SCc_CHORS, SCc_ANS, BCc_TRPS3, BCc_DHFS, SCc_AOXSr2, SCc_BTS5 )	44.1176	99.9528	99.8041	63.2246	54.3739
KO ( SCc_CHORS, SCc_ANS, BCc_TRPS3, BCc_DHFS, BCc_AOXSr2, SCc_BTS5 )	44.1176	99.9525	99.8041	63.2246	85.8671
KO ( SCc_CHORS, SCc_ANS, BCc_TRPS3, BCc_DHFS, SCc_AOXSr2, BCc_BTS5 )	44.1176	99.9523	99.8041	63.2246	64.4003
KO ( SCc_CHORS, SCc_ANS, BCc_TRPS3, BCc_DHFS, BCc_AOXSr2, BCc_BTS5 )	44.1176	99.9521	99.8041	63.2246	58.6592
KO ( SCc_CHORS, SCc_ANS, SCc_TRPS3, SCc_DHFS, SCc_AOXSr2, SCc_BTS5 )	44.1176	99.9143	69.3226	93.2524	54.3739
KO ( SCc_CHORS, SCc_ANS, SCc_TRPS3, SCc_DHFS, BCc_AOXSr2, SCc_BTS5 )	44.1176	99.914	69.3226	93.2524	85.8671
KO ( SCc_CHORS, SCc_ANS, SCc_TRPS3, SCc_DHFS, SCc_AOXSr2, BCc_BTS5 )	44.1176	99.9139	69.3226	93.2524	66.0396
KO ( SCc_CHORS, SCc_ANS, SCc_TRPS3, SCc_DHFS, BCc_AOXSr2, BCc_BTS5 )	44.1176	99.9136	69.3226	93.2524	58.6592
KO ( SCc_CHORS, SCc_ANS, SCc_TRPS3, BCc_DHFS, SCc_AOXSr2, SCc_BTS5 )	44.1176	99.8783	69.3226	63.2246	54.3739
KO ( SCc_CHORS, SCc_ANS, SCc_TRPS3, BCc_DHFS, BCc_AOXSr2, SCc_BTS5 )	44.1176	99.878	69.3226	63.2246	85.8671
KO ( SCc_CHORS, SCc_ANS, SCc_TRPS3, BCc_DHFS, SCc_AOXSr2, BCc_BTS5 )	44.1176	99.8779	69.3226	63.2246	64.4003
KO ( SCc_CHORS, SCc_ANS, SCc_TRPS3, BCc_DHFS, BCc_AOXSr2, BCc_BTS5 )	44.1176	99.8777	69.3226	63.2246	58.6592
KO ( BCc_CHORS, BCc_ANS, BCc_TRPS3, SCc_DHFS, SCc_AOXSr2, SCc_BTS5 )	44.1176	99.6044	75.7557	86.2162	54.3739
KO ( BCc_CHORS, BCc_ANS, BCc_TRPS3, SCc_DHFS, BCc_AOXSr2, SCc_BTS5 )	44.1176	99.6041	75.7557	86.2162	85.8671
KO ( BCc_CHORS, BCc_ANS, BCc_TRPS3, SCc_DHFS, SCc_AOXSr2, BCc_BTS5 )	44.1176	99.6039	75.7557	86.2162	64.5949
KO ( BCc_CHORS, BCc_ANS, BCc_TRPS3, SCc_DHFS, BCc_AOXSr2, BCc_BTS5 )	44.1176	99.6037	75.7557	86.2162	58.6592
KO ( BCc_CHORS, SCc_ANS, BCc_TRPS3, SCc_DHFS, SCc_AOXSr2, SCc_BTS5 )	44.1176	99.5913	75.2806	86.2162	54.3739
KO ( BCc_CHORS, SCc_ANS, BCc_TRPS3, SCc_DHFS, BCc_AOXSr2, SCc_BTS5 )	44.1176	99.591	75.2806	86.2162	85.8671
KO ( BCc_CHORS, SCc_ANS, BCc_TRPS3, SCc_DHFS, SCc_AOXSr2, BCc_BTS5 )	44.1176	99.5908	75.2806	86.2162	64.5949
KO ( BCc_CHORS, SCc_ANS, BCc_TRPS3, SCc_DHFS, BCc_AOXSr2, BCc_BTS5 )	44.1176	99.5906	75.2806	86.2162	58.6592
KO ( BCc_CHORS, BCc_ANS, BCc_TRPS3, BCc_DHFS, SCc_AOXSr2, SCc_BTS5 )	44.1176	99.5878	75.7557	71.3012	54.3739
KO ( BCc_CHORS, BCc_ANS, BCc_TRPS3, BCc_DHFS, BCc_AOXSr2, SCc_BTS5 )	44.1176	99.5875	75.7557	71.3012	85.8671
KO ( BCc_CHORS, BCc_ANS, BCc_TRPS3, BCc_DHFS, SCc_AOXSr2, BCc_BTS5 )	44.1176	99.5874	75.7557	71.3012	64.4003
KO ( BCc_CHORS, BCc_ANS, BCc_TRPS3, BCc_DHFS, BCc_AOXSr2, BCc_BTS5 )	44.1176	99.5872	75.7557	71.3012	58.6592
KO ( BCc_CHORS, SCc_ANS, BCc_TRPS3, BCc_DHFS, SCc_AOXSr2, SCc_BTS5 )	44.1176	99.5747	75.2806	71.3012	54.3739
KO ( BCc_CHORS, SCc_ANS, BCc_TRPS3, BCc_DHFS, BCc_AOXSr2, SCc_BTS5 )	44.1176	99.5744	75.2806	71.3012	85.8671
KO ( BCc_CHORS, SCc_ANS, BCc_TRPS3, BCc_DHFS, SCc_AOXSr2, BCc_BTS5 )	44.1176	99.5743	75.2806	71.3012	64.4003
KO ( BCc_CHORS, SCc_ANS, BCc_TRPS3, BCc_DHFS, BCc_AOXSr2, BCc_BTS5 )	44.1176	99.5741	75.2806	71.3012	58.6592
KO ( BCc_CHORS, SCc_ANS, SCc_TRPS3, SCc_DHFS, SCc_AOXSr2, SCc_BTS5 )	44.1176	99.5173	77.8564	86.2162	54.3739
KO ( BCc_CHORS, SCc_ANS, SCc_TRPS3, SCc_DHFS, BCc_AOXSr2, SCc_BTS5 )	44.1176	99.517	77.8564	86.2162	85.8671
KO ( BCc_CHORS, SCc_ANS, SCc_TRPS3, SCc_DHFS, SCc_AOXSr2, BCc_BTS5 )	44.1176	99.5169	77.8564	86.2162	64.5949
KO ( BCc_CHORS, SCc_ANS, SCc_TRPS3, SCc_DHFS, BCc_AOXSr2, BCc_BTS5 )	44.1176	99.5167	77.8564	86.2162	58.6592
KO ( BCc_CHORS, SCc_ANS, SCc_TRPS3, BCc_DHFS, SCc_AOXSr2, SCc_BTS5 )	44.1176	99.5008	77.8564	71.3012	54.3739
KO ( BCc_CHORS, SCc_ANS, SCc_TRPS3, BCc_DHFS, BCc_AOXSr2, SCc_BTS5 )	44.1176	99.5005	77.8564	71.3012	85.8671
KO ( BCc_CHORS, SCc_ANS, SCc_TRPS3, BCc_DHFS, SCc_AOXSr2, BCc_BTS5 )	44.1176	99.5004	77.8564	71.3012	64.4003
KO ( BCc_CHORS, SCc_ANS, SCc_TRPS3, BCc_DHFS, BCc_AOXSr2, BCc_BTS5 )	44.1176	99.5002	77.8564	71.3012	58.6592
KO ( SCc_CHORS, BCc_ANS, BCc_TRPS3, SCc_DHFS, SCc_AOXSr2, SCc_BTS5 )	44.1176	99.4545	68.443	93.2524	54.3739
KO ( SCc_CHORS, BCc_ANS, BCc_TRPS3, SCc_DHFS, BCc_AOXSr2, SCc_BTS5 )	44.1176	99.4542	68.443	93.2524	85.8671
KO ( SCc_CHORS, BCc_ANS, BCc_TRPS3, SCc_DHFS, SCc_AOXSr2, BCc_BTS5 )	44.1176	99.4541	68.443	93.2524	66.0396
KO ( SCc_CHORS, BCc_ANS, BCc_TRPS3, SCc_DHFS, BCc_AOXSr2, BCc_BTS5 )	44.1176	99.4539	68.443	93.2524	58.6592
KO ( SCc_CHORS, BCc_ANS, BCc_TRPS3, BCc_DHFS, SCc_AOXSr2, SCc_BTS5 )	44.1176	99.4189	68.443	63.2246	54.3739
KO ( SCc_CHORS, BCc_ANS, BCc_TRPS3, BCc_DHFS, BCc_AOXSr2, SCc_BTS5 )	44.1176	99.4186	68.443	63.2246	85.8671
KO ( SCc_CHORS, BCc_ANS, BCc_TRPS3, BCc_DHFS, SCc_AOXSr2, BCc_BTS5 )	44.1176	99.4184	68.443	63.2246	64.4003
KO ( SCc_CHORS, BCc_ANS, BCc_TRPS3, BCc_DHFS, BCc_AOXSr2, BCc_BTS5 )	44.1176	99.4182	68.443	63.2246	58.6592
KO ( BCc_CHORS, BCc_ANS, SCc_TRPS3, SCc_DHFS, SCc_AOXSr2, SCc_BTS5 )	44.1176	99.1501	69.0952	86.2162	54.3739
KO ( BCc_CHORS, BCc_ANS, SCc_TRPS3, SCc_DHFS, BCc_AOXSr2, SCc_BTS5 )	44.1176	99.1498	69.0952	86.2162	85.8671
KO ( BCc_CHORS, BCc_ANS, SCc_TRPS3, SCc_DHFS, SCc_AOXSr2, BCc_BTS5 )	44.1176	99.1497	69.0952	86.2162	64.5949
KO ( BCc_CHORS, BCc_ANS, SCc_TRPS3, SCc_DHFS, BCc_AOXSr2, BCc_BTS5 )	44.1176	99.1495	69.0952	86.2162	58.6592
KO ( BCc_CHORS, BCc_ANS, SCc_TRPS3, BCc_DHFS, SCc_AOXSr2, SCc_BTS5 )	44.1176	99.1337	69.0952	71.3012	54.3739
KO ( BCc_CHORS, BCc_ANS, SCc_TRPS3, BCc_DHFS, BCc_AOXSr2, SCc_BTS5 )	44.1176	99.1334	69.0952	71.3012	85.8671
KO ( BCc_CHORS, BCc_ANS, SCc_TRPS3, BCc_DHFS, SCc_AOXSr2, BCc_BTS5 )	44.1176	99.1333	69.0952	71.3012	64.4003
KO ( BCc_CHORS, BCc_ANS, SCc_TRPS3, BCc_DHFS, BCc_AOXSr2, BCc_BTS5 )	44.1176	99.1331	69.0952	71.3012	58.6592
KO ( SCc_CHORS, BCc_ANS, SCc_TRPS3, SCc_DHFS, SCc_AOXSr2, SCc_BTS5 )	44.1176	99.0017	55.5082	93.2524	54.3739
KO ( SCc_CHORS, BCc_ANS, SCc_TRPS3, SCc_DHFS, BCc_AOXSr2, SCc_BTS5 )	44.1176	99.0014	55.5082	93.2524	85.8671
KO ( SCc_CHORS, BCc_ANS, SCc_TRPS3, SCc_DHFS, SCc_AOXSr2, BCc_BTS5 )	44.1176	99.0012	55.5082	93.2524	66.0396
KO ( SCc_CHORS, BCc_ANS, SCc_TRPS3, SCc_DHFS, BCc_AOXSr2, BCc_BTS5 )	44.1176	99.001	55.5082	93.2524	58.6592
KO ( SCc_CHORS, BCc_ANS, SCc_TRPS3, BCc_DHFS, SCc_AOXSr2, SCc_BTS5 )	44.1176	98.9663	55.5082	63.2246	54.3739
KO ( SCc_CHORS, BCc_ANS, SCc_TRPS3, BCc_DHFS, BCc_AOXSr2, SCc_BTS5 )	44.1176	98.966	55.5082	63.2246	85.8671
KO ( SCc_CHORS, BCc_ANS, SCc_TRPS3, BCc_DHFS, SCc_AOXSr2, BCc_BTS5 )	44.1176	98.9659	55.5082	63.2246	64.4003
KO ( SCc_CHORS, BCc_ANS, SCc_TRPS3, BCc_DHFS, BCc_AOXSr2, BCc_BTS5 )	44.1176	98.9657	55.5082	63.2246	58.6592
KO ( SCc_SHK3Dr, SCc_CHORS, SCc_ANS, SCc_DHFS, SCc_AOXSr2, SCc_BTS5 )	42.6471	99.9992	100	93.2524	54.3739
KO ( SCc_SHK3Dr, SCc_CHORS, SCc_ANS, SCc_DHFS, BCc_AOXSr2, SCc_BTS5 )	42.6471	99.9989	100	93.2524	85.8671
KO ( SCc_SHK3Dr, SCc_CHORS, SCc_ANS, SCc_DHFS, SCc_AOXSr2, BCc_BTS5 )	42.6471	99.9987	100	93.2524	66.0396
KO ( SCc_SHK3Dr, SCc_CHORS, SCc_ANS, SCc_DHFS, BCc_AOXSr2, BCc_BTS5 )	42.6471	99.9985	100	93.2524	58.6592
KO ( SCc_SHK3Dr, BCc_TRPS3, SCc_DHFS, SCc_AOXSr2, SCc_BTS5 )	42.6471	99.9888	99.8041	93.2524	54.3739
KO ( SCc_SHK3Dr, SCc_CHORS, SCc_ANS, BCc_TRPS3, SCc_DHFS, SCc_AOXSr2 )	42.6471	99.9888	99.8041	93.2524	66.0877
KO ( SCc_SHK3Dr, SCc_CHORS, SCc_ANS, BCc_TRPS3, SCc_DHFS, SCc_BTS5 )	42.6471	99.9888	99.8041	93.2524	100
KO ( SCc_SHK3Dr, BCc_TRPS3, SCc_DHFS, BCc_AOXSr2, SCc_BTS5 )	42.6471	99.9885	99.8041	93.2524	85.8671
KO ( SCc_SHK3Dr, SCc_CHORS, SCc_ANS, BCc_TRPS3, SCc_DHFS, BCc_AOXSr2 )	42.6471	99.9885	99.8041	93.2524	85.8671
KO ( SCc_SHK3Dr, BCc_TRPS3, SCc_DHFS, SCc_AOXSr2, BCc_BTS5 )	42.6471	99.9884	99.8041	93.2524	66.0396
KO ( SCc_SHK3Dr, SCc_CHORS, SCc_ANS, BCc_TRPS3, SCc_DHFS, BCc_BTS5 )	42.6471	99.9884	99.8041	93.2524	71.3895
KO ( SCc_SHK3Dr, BCc_TRPS3, SCc_DHFS, BCc_AOXSr2, BCc_BTS5 )	42.6471	99.9882	99.8041	93.2524	58.6592
KO ( SCc_SHK3Dr, BCc_TRPS3, BCc_DHFS, SCc_AOXSr2, SCc_BTS5 )	42.6471	99.9656	99.8041	71.3012	54.3739
KO ( SCc_SHK3Dr, BCc_TRPS3, BCc_DHFS, BCc_AOXSr2, SCc_BTS5 )	42.6471	99.9653	99.8041	71.3012	85.8671
KO ( SCc_SHK3Dr, BCc_TRPS3, BCc_DHFS, SCc_AOXSr2, BCc_BTS5 )	42.6471	99.9652	99.8041	71.3012	64.4003
KO ( SCc_SHK3Dr, BCc_TRPS3, BCc_DHFS, BCc_AOXSr2, BCc_BTS5 )	42.6471	99.965	99.8041	71.3012	58.6592
KO ( SCc_SHK3Dr, SCc_CHORS, SCc_ANS, BCc_DHFS, SCc_AOXSr2, SCc_BTS5 )	42.6471	99.9631	100	63.2246	54.3739
KO ( SCc_SHK3Dr, SCc_CHORS, SCc_ANS, BCc_DHFS, BCc_AOXSr2, SCc_BTS5 )	42.6471	99.9628	100	63.2246	85.8671
KO ( SCc_SHK3Dr, SCc_CHORS, SCc_ANS, BCc_DHFS, SCc_AOXSr2, BCc_BTS5 )	42.6471	99.9627	100	63.2246	64.4003
KO ( SCc_SHK3Dr, SCc_CHORS, SCc_ANS, BCc_DHFS, BCc_AOXSr2, BCc_BTS5 )	42.6471	99.9625	100	63.2246	58.6592
KO ( SCc_SHK3Dr, SCc_CHORS, SCc_ANS, BCc_TRPS3, BCc_DHFS, SCc_AOXSr2 )	42.6471	99.9528	99.8041	63.2246	66.0877
KO ( SCc_SHK3Dr, SCc_CHORS, SCc_ANS, BCc_TRPS3, BCc_DHFS, SCc_BTS5 )	42.6471	99.9528	99.8041	63.2246	100
KO ( SCc_SHK3Dr, SCc_CHORS, SCc_ANS, BCc_TRPS3, BCc_DHFS, BCc_AOXSr2 )	42.6471	99.9525	99.8041	63.2246	85.8671
KO ( SCc_SHK3Dr, SCc_CHORS, SCc_ANS, BCc_TRPS3, BCc_DHFS, BCc_BTS5 )	42.6471	99.9523	99.8041	63.2246	71.3895
KO ( SCc_SHK3Dr, SCc_TRPS3, SCc_DHFS, SCc_AOXSr2, SCc_BTS5 )	42.6471	99.9143	71.51	93.2524	54.3739
KO ( SCc_SHK3Dr, SCc_CHORS, SCc_ANS, SCc_TRPS3, SCc_DHFS, SCc_AOXSr2 )	42.6471	99.9143	64.666	93.2524	66.0877
KO ( SCc_SHK3Dr, SCc_CHORS, SCc_ANS, SCc_TRPS3, SCc_DHFS, SCc_BTS5 )	42.6471	99.9143	64.666	93.2524	100
KO ( SCc_SHK3Dr, SCc_TRPS3, SCc_DHFS, BCc_AOXSr2, SCc_BTS5 )	42.6471	99.914	71.51	93.2524	85.8671
KO ( SCc_SHK3Dr, SCc_CHORS, SCc_ANS, SCc_TRPS3, SCc_DHFS, BCc_AOXSr2 )	42.6471	99.914	64.666	93.2524	85.8671
KO ( SCc_SHK3Dr, SCc_CHORS, SCc_ANS, SCc_TRPS3, SCc_DHFS, BCc_BTS5 )	42.6471	99.9139	64.666	93.2524	71.3895
KO ( SCc_SHK3Dr, SCc_TRPS3, SCc_DHFS, SCc_AOXSr2, BCc_BTS5 )	42.6471	99.9139	71.51	93.2524	66.0396
KO ( SCc_SHK3Dr, SCc_TRPS3, SCc_DHFS, BCc_AOXSr2, BCc_BTS5 )	42.6471	99.9136	71.51	93.2524	58.6592
KO ( SCc_SHK3Dr, SCc_TRPS3, BCc_DHFS, SCc_AOXSr2, SCc_BTS5 )	42.6471	99.8911	71.51	71.3012	54.3739
KO ( SCc_SHK3Dr, SCc_TRPS3, BCc_DHFS, BCc_AOXSr2, SCc_BTS5 )	42.6471	99.8908	71.51	71.3012	85.8671
KO ( SCc_SHK3Dr, SCc_TRPS3, BCc_DHFS, SCc_AOXSr2, BCc_BTS5 )	42.6471	99.8907	71.51	71.3012	64.4003
KO ( SCc_SHK3Dr, SCc_TRPS3, BCc_DHFS, BCc_AOXSr2, BCc_BTS5 )	42.6471	99.8905	71.51	71.3012	58.6592
KO ( SCc_SHK3Dr, SCc_CHORS, SCc_ANS, SCc_TRPS3, BCc_DHFS, SCc_AOXSr2 )	42.6471	99.8783	64.666	63.2246	66.0877
KO ( SCc_SHK3Dr, SCc_CHORS, SCc_ANS, SCc_TRPS3, BCc_DHFS, SCc_BTS5 )	42.6471	99.8783	64.666	63.2246	100
KO ( SCc_SHK3Dr, SCc_CHORS, SCc_ANS, SCc_TRPS3, BCc_DHFS, BCc_AOXSr2 )	42.6471	99.878	64.666	63.2246	85.8671
KO ( SCc_SHK3Dr, SCc_CHORS, SCc_ANS, SCc_TRPS3, BCc_DHFS, BCc_BTS5 )	42.6471	99.8779	64.666	63.2246	71.3895
KO ( BCc_SHK3Dr, BCc_CHORS, BCc_ANS, SCc_DHFS, SCc_AOXSr2, SCc_BTS5 )	42.6471	99.6044	64.421	73.149	54.3739
KO ( BCc_SHK3Dr, BCc_CHORS, BCc_ANS, BCc_TRPS3, SCc_DHFS, SCc_AOXSr2 )	42.6471	99.6044	64.421	73.149	66.0877
KO ( BCc_SHK3Dr, BCc_CHORS, BCc_ANS, BCc_TRPS3, SCc_DHFS, SCc_BTS5 )	42.6471	99.6044	64.421	73.149	100
KO ( BCc_SHK3Dr, BCc_TRPS3, SCc_DHFS, SCc_AOXSr2, SCc_BTS5 )	42.6471	99.6044	65.7951	79.4608	54.3739
KO ( BCc_SHK3Dr, BCc_CHORS, BCc_ANS, SCc_DHFS, BCc_AOXSr2, SCc_BTS5 )	42.6471	99.6041	64.421	73.149	85.8671
KO ( BCc_SHK3Dr, BCc_TRPS3, SCc_DHFS, BCc_AOXSr2, SCc_BTS5 )	42.6471	99.6041	65.7951	79.4608	85.8671
KO ( BCc_SHK3Dr, BCc_CHORS, BCc_ANS, BCc_TRPS3, SCc_DHFS, BCc_AOXSr2 )	42.6471	99.6041	64.421	73.149	85.8671
KO ( BCc_SHK3Dr, BCc_CHORS, BCc_ANS, SCc_DHFS, SCc_AOXSr2, BCc_BTS5 )	42.6471	99.6039	64.421	73.149	64.5949
KO ( BCc_SHK3Dr, BCc_CHORS, BCc_ANS, BCc_TRPS3, SCc_DHFS, BCc_BTS5 )	42.6471	99.6039	64.421	73.149	71.3895
KO ( BCc_SHK3Dr, BCc_TRPS3, SCc_DHFS, SCc_AOXSr2, BCc_BTS5 )	42.6471	99.6039	65.7951	79.4608	65.4447
KO ( BCc_SHK3Dr, BCc_TRPS3, SCc_DHFS, BCc_AOXSr2, BCc_BTS5 )	42.6471	99.6037	65.7951	79.4608	58.6592
KO ( BCc_SHK3Dr, BCc_CHORS, BCc_ANS, SCc_DHFS, BCc_AOXSr2, BCc_BTS5 )	42.6471	99.6037	64.421	73.149	58.6592
KO ( BCc_SHK3Dr, BCc_CHORS, SCc_ANS, SCc_DHFS, SCc_AOXSr2, SCc_BTS5 )	42.6471	99.6015	75.163	73.149	54.3739
KO ( BCc_SHK3Dr, BCc_CHORS, SCc_ANS, SCc_DHFS, BCc_AOXSr2, SCc_BTS5 )	42.6471	99.6012	75.163	73.149	85.8671
KO ( BCc_SHK3Dr, BCc_CHORS, SCc_ANS, SCc_DHFS, SCc_AOXSr2, BCc_BTS5 )	42.6471	99.6011	75.163	73.149	64.5949
KO ( BCc_SHK3Dr, BCc_CHORS, SCc_ANS, SCc_DHFS, BCc_AOXSr2, BCc_BTS5 )	42.6471	99.6009	75.163	73.149	58.6592
KO ( BCc_SHK3Dr, BCc_CHORS, SCc_ANS, BCc_TRPS3, SCc_DHFS, SCc_AOXSr2 )	42.6471	99.5913	60.7398	73.149	66.0877
KO ( BCc_SHK3Dr, BCc_CHORS, SCc_ANS, BCc_TRPS3, SCc_DHFS, SCc_BTS5 )	42.6471	99.5913	60.7398	73.149	100
KO ( BCc_SHK3Dr, BCc_CHORS, SCc_ANS, BCc_TRPS3, SCc_DHFS, BCc_AOXSr2 )	42.6471	99.591	60.7398	73.149	85.8671
KO ( BCc_SHK3Dr, BCc_CHORS, SCc_ANS, BCc_TRPS3, SCc_DHFS, BCc_BTS5 )	42.6471	99.5908	60.7398	73.149	71.3895
KO ( BCc_SHK3Dr, BCc_TRPS3, BCc_DHFS, SCc_AOXSr2, SCc_BTS5 )	42.6471	99.5878	65.7951	63.8108	54.3739
KO ( BCc_SHK3Dr, BCc_CHORS, BCc_ANS, BCc_DHFS, SCc_AOXSr2, SCc_BTS5 )	42.6471	99.5878	64.421	63.8108	54.3739
KO ( BCc_SHK3Dr, BCc_CHORS, BCc_ANS, BCc_TRPS3, BCc_DHFS, SCc_AOXSr2 )	42.6471	99.5878	64.421	63.8108	66.0877
KO ( BCc_SHK3Dr, BCc_CHORS, BCc_ANS, BCc_TRPS3, BCc_DHFS, SCc_BTS5 )	42.6471	99.5878	64.421	63.8108	100
KO ( BCc_SHK3Dr, BCc_CHORS, BCc_ANS, BCc_DHFS, BCc_AOXSr2, SCc_BTS5 )	42.6471	99.5875	64.421	63.8108	85.8671
KO ( BCc_SHK3Dr, BCc_CHORS, BCc_ANS, BCc_TRPS3, BCc_DHFS, BCc_AOXSr2 )	42.6471	99.5875	64.421	63.8108	85.8671
KO ( BCc_SHK3Dr, BCc_TRPS3, BCc_DHFS, BCc_AOXSr2, SCc_BTS5 )	42.6471	99.5875	65.7951	63.8108	85.8671
KO ( BCc_SHK3Dr, BCc_CHORS, BCc_ANS, BCc_TRPS3, BCc_DHFS, BCc_BTS5 )	42.6471	99.5874	64.421	63.8108	71.3895
KO ( BCc_SHK3Dr, BCc_TRPS3, BCc_DHFS, SCc_AOXSr2, BCc_BTS5 )	42.6471	99.5874	65.7951	63.8108	64.4003
KO ( BCc_SHK3Dr, BCc_CHORS, BCc_ANS, BCc_DHFS, SCc_AOXSr2, BCc_BTS5 )	42.6471	99.5874	64.421	63.8108	64.4003
KO ( BCc_SHK3Dr, BCc_CHORS, BCc_ANS, BCc_DHFS, BCc_AOXSr2, BCc_BTS5 )	42.6471	99.5872	64.421	63.8108	58.6592
KO ( BCc_SHK3Dr, BCc_TRPS3, BCc_DHFS, BCc_AOXSr2, BCc_BTS5 )	42.6471	99.5872	65.7951	63.8108	58.6592
KO ( BCc_SHK3Dr, BCc_CHORS, SCc_ANS, BCc_DHFS, SCc_AOXSr2, SCc_BTS5 )	42.6471	99.585	75.163	63.8108	54.3739
KO ( BCc_SHK3Dr, BCc_CHORS, SCc_ANS, BCc_DHFS, BCc_AOXSr2, SCc_BTS5 )	42.6471	99.5847	75.163	63.8108	85.8671
KO ( BCc_SHK3Dr, BCc_CHORS, SCc_ANS, BCc_DHFS, SCc_AOXSr2, BCc_BTS5 )	42.6471	99.5846	75.163	63.8108	64.4003
KO ( BCc_SHK3Dr, BCc_CHORS, SCc_ANS, BCc_DHFS, BCc_AOXSr2, BCc_BTS5 )	42.6471	99.5843	75.163	63.8108	58.6592
KO ( BCc_SHK3Dr, BCc_CHORS, SCc_ANS, BCc_TRPS3, BCc_DHFS, SCc_AOXSr2 )	42.6471	99.5747	60.7398	63.8108	66.0877
KO ( BCc_SHK3Dr, BCc_CHORS, SCc_ANS, BCc_TRPS3, BCc_DHFS, SCc_BTS5 )	42.6471	99.5747	60.7398	63.8108	100
KO ( BCc_SHK3Dr, BCc_CHORS, SCc_ANS, BCc_TRPS3, BCc_DHFS, BCc_AOXSr2 )	42.6471	99.5744	60.7398	63.8108	85.8671
KO ( BCc_SHK3Dr, BCc_CHORS, SCc_ANS, BCc_TRPS3, BCc_DHFS, BCc_BTS5 )	42.6471	99.5743	60.7398	63.8108	71.3895
KO ( BCc_SHK3Dr, BCc_CHORS, SCc_ANS, SCc_TRPS3, SCc_DHFS, SCc_AOXSr2 )	42.6471	99.5173	75.163	73.149	66.0877
KO ( BCc_SHK3Dr, BCc_CHORS, SCc_ANS, SCc_TRPS3, SCc_DHFS, SCc_BTS5 )	42.6471	99.5173	75.163	73.149	100
KO ( BCc_SHK3Dr, SCc_TRPS3, SCc_DHFS, SCc_AOXSr2, SCc_BTS5 )	42.6471	99.5173	75.922	79.4608	54.3739
KO ( BCc_SHK3Dr, BCc_CHORS, SCc_ANS, SCc_TRPS3, SCc_DHFS, BCc_AOXSr2 )	42.6471	99.517	75.163	73.149	85.8671
KO ( BCc_SHK3Dr, SCc_TRPS3, SCc_DHFS, BCc_AOXSr2, SCc_BTS5 )	42.6471	99.517	75.922	79.4608	85.8671
KO ( BCc_SHK3Dr, SCc_TRPS3, SCc_DHFS, SCc_AOXSr2, BCc_BTS5 )	42.6471	99.5169	75.922	79.4608	65.4447
KO ( BCc_SHK3Dr, BCc_CHORS, SCc_ANS, SCc_TRPS3, SCc_DHFS, BCc_BTS5 )	42.6471	99.5169	75.163	73.149	71.3895
KO ( BCc_SHK3Dr, SCc_TRPS3, SCc_DHFS, BCc_AOXSr2, BCc_BTS5 )	42.6471	99.5167	75.922	79.4608	58.6592
KO ( BCc_SHK3Dr, BCc_CHORS, SCc_ANS, SCc_TRPS3, BCc_DHFS, SCc_AOXSr2 )	42.6471	99.5008	75.163	63.8108	66.0877
KO ( BCc_SHK3Dr, BCc_CHORS, SCc_ANS, SCc_TRPS3, BCc_DHFS, SCc_BTS5 )	42.6471	99.5008	75.163	63.8108	100
KO ( BCc_SHK3Dr, SCc_TRPS3, BCc_DHFS, SCc_AOXSr2, SCc_BTS5 )	42.6471	99.5008	75.922	63.8108	54.3739
KO ( BCc_SHK3Dr, BCc_CHORS, SCc_ANS, SCc_TRPS3, BCc_DHFS, BCc_AOXSr2 )	42.6471	99.5005	75.163	63.8108	85.8671
KO ( BCc_SHK3Dr, SCc_TRPS3, BCc_DHFS, BCc_AOXSr2, SCc_BTS5 )	42.6471	99.5005	75.922	63.8108	85.8671
KO ( BCc_SHK3Dr, BCc_CHORS, SCc_ANS, SCc_TRPS3, BCc_DHFS, BCc_BTS5 )	42.6471	99.5004	75.163	63.8108	71.3895
KO ( BCc_SHK3Dr, SCc_TRPS3, BCc_DHFS, SCc_AOXSr2, BCc_BTS5 )	42.6471	99.5004	75.922	63.8108	64.4003
KO ( BCc_SHK3Dr, SCc_TRPS3, BCc_DHFS, BCc_AOXSr2, BCc_BTS5 )	42.6471	99.5002	75.922	63.8108	58.6592
KO ( SCc_SHK3Dr, SCc_CHORS, BCc_ANS, SCc_DHFS, SCc_AOXSr2, SCc_BTS5 )	42.6471	99.4545	68.443	93.2524	54.3739
KO ( SCc_SHK3Dr, SCc_CHORS, BCc_ANS, BCc_TRPS3, SCc_DHFS, SCc_AOXSr2 )	42.6471	99.4545	68.443	93.2524	66.0877
KO ( SCc_SHK3Dr, SCc_CHORS, BCc_ANS, BCc_TRPS3, SCc_DHFS, SCc_BTS5 )	42.6471	99.4545	68.443	93.2524	100
KO ( SCc_SHK3Dr, SCc_CHORS, BCc_ANS, BCc_TRPS3, SCc_DHFS, BCc_AOXSr2 )	42.6471	99.4542	68.443	93.2524	85.8671
KO ( SCc_SHK3Dr, SCc_CHORS, BCc_ANS, SCc_DHFS, BCc_AOXSr2, SCc_BTS5 )	42.6471	99.4542	68.443	93.2524	85.8671
KO ( SCc_SHK3Dr, SCc_CHORS, BCc_ANS, BCc_TRPS3, SCc_DHFS, BCc_BTS5 )	42.6471	99.4541	68.443	93.2524	71.3895
KO ( SCc_SHK3Dr, SCc_CHORS, BCc_ANS, SCc_DHFS, SCc_AOXSr2, BCc_BTS5 )	42.6471	99.4541	68.443	93.2524	66.0396
KO ( SCc_SHK3Dr, SCc_CHORS, BCc_ANS, SCc_DHFS, BCc_AOXSr2, BCc_BTS5 )	42.6471	99.4539	68.443	93.2524	58.6592
KO ( SCc_SHK3Dr, SCc_CHORS, BCc_ANS, BCc_DHFS, SCc_AOXSr2, SCc_BTS5 )	42.6471	99.4189	68.443	63.2246	54.3739
KO ( SCc_SHK3Dr, SCc_CHORS, BCc_ANS, BCc_TRPS3, BCc_DHFS, SCc_AOXSr2 )	42.6471	99.4189	68.443	63.2246	66.0877
KO ( SCc_SHK3Dr, SCc_CHORS, BCc_ANS, BCc_TRPS3, BCc_DHFS, SCc_BTS5 )	42.6471	99.4189	68.443	63.2246	100
KO ( SCc_SHK3Dr, SCc_CHORS, BCc_ANS, BCc_DHFS, BCc_AOXSr2, SCc_BTS5 )	42.6471	99.4186	68.443	63.2246	85.8671
KO ( SCc_SHK3Dr, SCc_CHORS, BCc_ANS, BCc_TRPS3, BCc_DHFS, BCc_AOXSr2 )	42.6471	99.4186	68.443	63.2246	85.8671
KO ( SCc_SHK3Dr, SCc_CHORS, BCc_ANS, BCc_TRPS3, BCc_DHFS, BCc_BTS5 )	42.6471	99.4184	68.443	63.2246	71.3895
KO ( SCc_SHK3Dr, SCc_CHORS, BCc_ANS, BCc_DHFS, SCc_AOXSr2, BCc_BTS5 )	42.6471	99.4184	68.443	63.2246	64.4003
KO ( SCc_SHK3Dr, SCc_CHORS, BCc_ANS, BCc_DHFS, BCc_AOXSr2, BCc_BTS5 )	42.6471	99.4182	68.443	63.2246	58.6592
KO ( BCc_SHK3Dr, BCc_CHORS, BCc_ANS, SCc_TRPS3, SCc_DHFS, SCc_AOXSr2 )	42.6471	99.1501	59.6414	73.149	66.0877
KO ( BCc_SHK3Dr, BCc_CHORS, BCc_ANS, SCc_TRPS3, SCc_DHFS, SCc_BTS5 )	42.6471	99.1501	59.6414	73.149	100
KO ( BCc_SHK3Dr, BCc_CHORS, BCc_ANS, SCc_TRPS3, SCc_DHFS, BCc_AOXSr2 )	42.6471	99.1498	58.8917	73.149	85.8671
KO ( BCc_SHK3Dr, BCc_CHORS, BCc_ANS, SCc_TRPS3, SCc_DHFS, BCc_BTS5 )	42.6471	99.1497	58.8917	73.149	71.3895
KO ( BCc_SHK3Dr, BCc_CHORS, BCc_ANS, SCc_TRPS3, BCc_DHFS, SCc_AOXSr2 )	42.6471	99.1337	59.6414	63.8108	66.0877
KO ( BCc_SHK3Dr, BCc_CHORS, BCc_ANS, SCc_TRPS3, BCc_DHFS, SCc_BTS5 )	42.6471	99.1337	59.6414	63.8108	100
KO ( BCc_SHK3Dr, BCc_CHORS, BCc_ANS, SCc_TRPS3, BCc_DHFS, BCc_AOXSr2 )	42.6471	99.1334	58.8917	63.8108	85.8671
KO ( BCc_SHK3Dr, BCc_CHORS, BCc_ANS, SCc_TRPS3, BCc_DHFS, BCc_BTS5 )	42.6471	99.1333	58.8917	63.8108	71.3895
KO ( SCc_SHK3Dr, SCc_CHORS, BCc_ANS, SCc_TRPS3, SCc_DHFS, SCc_AOXSr2 )	42.6471	99.0017	55.5082	93.2524	66.0877
KO ( SCc_SHK3Dr, SCc_CHORS, BCc_ANS, SCc_TRPS3, SCc_DHFS, SCc_BTS5 )	42.6471	99.0017	55.5082	93.2524	100
KO ( SCc_SHK3Dr, SCc_CHORS, BCc_ANS, SCc_TRPS3, SCc_DHFS, BCc_AOXSr2 )	42.6471	99.0014	55.5082	93.2524	85.8671
KO ( SCc_SHK3Dr, SCc_CHORS, BCc_ANS, SCc_TRPS3, SCc_DHFS, BCc_BTS5 )	42.6471	99.0012	55.5082	93.2524	71.3895
KO ( SCc_SHK3Dr, SCc_CHORS, BCc_ANS, SCc_TRPS3, BCc_DHFS, SCc_AOXSr2 )	42.6471	98.9663	55.5082	63.2246	66.0877
KO ( SCc_SHK3Dr, SCc_CHORS, BCc_ANS, SCc_TRPS3, BCc_DHFS, SCc_BTS5 )	42.6471	98.9663	55.5082	63.2246	100
KO ( SCc_SHK3Dr, SCc_CHORS, BCc_ANS, SCc_TRPS3, BCc_DHFS, BCc_AOXSr2 )	42.6471	98.966	55.5082	63.2246	85.8671
KO ( SCc_SHK3Dr, SCc_CHORS, BCc_ANS, SCc_TRPS3, BCc_DHFS, BCc_BTS5 )	42.6471	98.9659	55.5082	63.2246	71.3895
KO ( SCc_SHK3Dr, BCc_CHORS, BCc_ANS, BCc_TRPS3, SCc_DHFS, SCc_AOXSr2 )	42.6471	98.3724	75.7557	86.2162	66.0877
KO ( SCc_SHK3Dr, BCc_CHORS, BCc_ANS, BCc_TRPS3, SCc_DHFS, SCc_BTS5 )	42.6471	98.3724	75.7557	86.2162	100
KO ( SCc_SHK3Dr, BCc_CHORS, BCc_ANS, SCc_DHFS, SCc_AOXSr2, SCc_BTS5 )	42.6471	98.3724	75.9926	86.2162	54.3739
KO ( SCc_SHK3Dr, BCc_CHORS, BCc_ANS, BCc_TRPS3, SCc_DHFS, BCc_AOXSr2 )	42.6471	98.3721	75.7557	86.2162	85.8671
KO ( SCc_SHK3Dr, BCc_CHORS, BCc_ANS, SCc_DHFS, BCc_AOXSr2, SCc_BTS5 )	42.6471	98.3721	75.9926	86.2162	85.8671
KO ( SCc_SHK3Dr, BCc_CHORS, BCc_ANS, BCc_TRPS3, SCc_DHFS, BCc_BTS5 )	42.6471	98.372	75.7557	86.2162	71.3895
KO ( SCc_SHK3Dr, BCc_CHORS, BCc_ANS, SCc_DHFS, SCc_AOXSr2, BCc_BTS5 )	42.6471	98.372	75.9926	86.2162	64.4003
KO ( SCc_SHK3Dr, BCc_CHORS, BCc_ANS, SCc_DHFS, BCc_AOXSr2, BCc_BTS5 )	42.6471	98.3717	75.9926	86.2162	58.6592
KO ( SCc_SHK3Dr, BCc_CHORS, SCc_ANS, SCc_DHFS, SCc_AOXSr2, SCc_BTS5 )	42.6471	98.3696	82.9894	86.2162	54.3739
KO ( SCc_SHK3Dr, BCc_CHORS, SCc_ANS, SCc_DHFS, BCc_AOXSr2, SCc_BTS5 )	42.6471	98.3693	82.9894	86.2162	85.8671
KO ( SCc_SHK3Dr, BCc_CHORS, SCc_ANS, SCc_DHFS, SCc_AOXSr2, BCc_BTS5 )	42.6471	98.3692	82.9894	86.2162	64.4003
KO ( SCc_SHK3Dr, BCc_CHORS, SCc_ANS, SCc_DHFS, BCc_AOXSr2, BCc_BTS5 )	42.6471	98.369	82.9894	86.2162	58.6592
KO ( SCc_SHK3Dr, BCc_CHORS, SCc_ANS, BCc_TRPS3, SCc_DHFS, SCc_AOXSr2 )	42.6471	98.3596	75.2806	86.2162	66.0877
KO ( SCc_SHK3Dr, BCc_CHORS, SCc_ANS, BCc_TRPS3, SCc_DHFS, SCc_BTS5 )	42.6471	98.3596	75.2806	86.2162	100
KO ( SCc_SHK3Dr, BCc_CHORS, SCc_ANS, BCc_TRPS3, SCc_DHFS, BCc_AOXSr2 )	42.6471	98.3593	75.2806	86.2162	85.8671
KO ( SCc_SHK3Dr, BCc_CHORS, SCc_ANS, BCc_TRPS3, SCc_DHFS, BCc_BTS5 )	42.6471	98.3592	75.2806	86.2162	71.3895
KO ( SCc_SHK3Dr, BCc_CHORS, BCc_ANS, BCc_TRPS3, BCc_DHFS, SCc_AOXSr2 )	42.6471	98.3562	75.7557	71.3012	66.0877
KO ( SCc_SHK3Dr, BCc_CHORS, BCc_ANS, BCc_TRPS3, BCc_DHFS, SCc_BTS5 )	42.6471	98.3562	75.7557	71.3012	100
KO ( SCc_SHK3Dr, BCc_CHORS, BCc_ANS, BCc_DHFS, SCc_AOXSr2, SCc_BTS5 )	42.6471	98.3562	75.9926	71.3012	54.3739
KO ( SCc_SHK3Dr, BCc_CHORS, BCc_ANS, BCc_DHFS, BCc_AOXSr2, SCc_BTS5 )	42.6471	98.3559	75.9926	71.3012	85.8671
KO ( SCc_SHK3Dr, BCc_CHORS, BCc_ANS, BCc_TRPS3, BCc_DHFS, BCc_AOXSr2 )	42.6471	98.3559	75.7557	71.3012	85.8671
KO ( SCc_SHK3Dr, BCc_CHORS, BCc_ANS, BCc_TRPS3, BCc_DHFS, BCc_BTS5 )	42.6471	98.3558	75.7557	71.3012	71.3895
KO ( SCc_SHK3Dr, BCc_CHORS, BCc_ANS, BCc_DHFS, SCc_AOXSr2, BCc_BTS5 )	42.6471	98.3558	75.9926	71.3012	64.4003
KO ( SCc_SHK3Dr, BCc_CHORS, BCc_ANS, BCc_DHFS, BCc_AOXSr2, BCc_BTS5 )	42.6471	98.3556	75.9926	71.3012	58.6592
KO ( SCc_SHK3Dr, BCc_CHORS, SCc_ANS, BCc_DHFS, SCc_AOXSr2, SCc_BTS5 )	42.6471	98.3535	82.9894	71.3012	54.3739
KO ( SCc_SHK3Dr, BCc_CHORS, SCc_ANS, BCc_DHFS, BCc_AOXSr2, SCc_BTS5 )	42.6471	98.3532	82.9894	71.3012	85.8671
KO ( SCc_SHK3Dr, BCc_CHORS, SCc_ANS, BCc_DHFS, SCc_AOXSr2, BCc_BTS5 )	42.6471	98.353	82.9894	71.3012	64.4003
KO ( SCc_SHK3Dr, BCc_CHORS, SCc_ANS, BCc_DHFS, BCc_AOXSr2, BCc_BTS5 )	42.6471	98.3528	82.9894	71.3012	58.6592
KO ( SCc_SHK3Dr, BCc_CHORS, SCc_ANS, BCc_TRPS3, BCc_DHFS, SCc_AOXSr2 )	42.6471	98.3434	75.2806	71.3012	66.0877
KO ( SCc_SHK3Dr, BCc_CHORS, SCc_ANS, BCc_TRPS3, BCc_DHFS, SCc_BTS5 )	42.6471	98.3434	75.2806	71.3012	100
KO ( SCc_SHK3Dr, BCc_CHORS, SCc_ANS, BCc_TRPS3, BCc_DHFS, BCc_AOXSr2 )	42.6471	98.3432	75.2806	71.3012	85.8671
KO ( SCc_SHK3Dr, BCc_CHORS, SCc_ANS, BCc_TRPS3, BCc_DHFS, BCc_BTS5 )	42.6471	98.343	75.2806	71.3012	71.3895
KO ( SCc_SHK3Dr, BCc_CHORS, SCc_ANS, SCc_TRPS3, SCc_DHFS, SCc_AOXSr2 )	42.6471	98.2875	63.3807	86.2162	66.0877
KO ( SCc_SHK3Dr, BCc_CHORS, SCc_ANS, SCc_TRPS3, SCc_DHFS, SCc_BTS5 )	42.6471	98.2875	63.3807	86.2162	100
KO ( SCc_SHK3Dr, BCc_CHORS, SCc_ANS, SCc_TRPS3, SCc_DHFS, BCc_AOXSr2 )	42.6471	98.2872	63.3807	86.2162	85.8671
KO ( SCc_SHK3Dr, BCc_CHORS, SCc_ANS, SCc_TRPS3, SCc_DHFS, BCc_BTS5 )	42.6471	98.287	63.3807	86.2162	71.3895
KO ( SCc_SHK3Dr, BCc_CHORS, SCc_ANS, SCc_TRPS3, BCc_DHFS, SCc_AOXSr2 )	42.6471	98.2713	63.3807	71.3012	66.0877
KO ( SCc_SHK3Dr, BCc_CHORS, SCc_ANS, SCc_TRPS3, BCc_DHFS, SCc_BTS5 )	42.6471	98.2713	63.3807	71.3012	100
KO ( SCc_SHK3Dr, BCc_CHORS, SCc_ANS, SCc_TRPS3, BCc_DHFS, BCc_AOXSr2 )	42.6471	98.2711	63.3807	71.3012	85.8671
KO ( SCc_SHK3Dr, BCc_CHORS, SCc_ANS, SCc_TRPS3, BCc_DHFS, BCc_BTS5 )	42.6471	98.2709	63.3807	71.3012	71.3895
KO ( SCc_SHK3Dr, BCc_CHORS, BCc_ANS, SCc_TRPS3, SCc_DHFS, SCc_AOXSr2 )	42.6471	97.9293	68.0949	86.2162	66.0877
KO ( SCc_SHK3Dr, BCc_CHORS, BCc_ANS, SCc_TRPS3, SCc_DHFS, SCc_BTS5 )	42.6471	97.9293	68.0949	86.2162	100
KO ( SCc_SHK3Dr, BCc_CHORS, BCc_ANS, SCc_TRPS3, SCc_DHFS, BCc_AOXSr2 )	42.6471	97.929	68.0949	86.2162	85.8671
KO ( SCc_SHK3Dr, BCc_CHORS, BCc_ANS, SCc_TRPS3, SCc_DHFS, BCc_BTS5 )	42.6471	97.9289	68.0949	86.2162	71.3895
KO ( SCc_SHK3Dr, BCc_CHORS, BCc_ANS, SCc_TRPS3, BCc_DHFS, SCc_AOXSr2 )	42.6471	97.9133	68.0949	71.3012	66.0877
KO ( SCc_SHK3Dr, BCc_CHORS, BCc_ANS, SCc_TRPS3, BCc_DHFS, SCc_BTS5 )	42.6471	97.9133	68.0949	71.3012	100
KO ( SCc_SHK3Dr, BCc_CHORS, BCc_ANS, SCc_TRPS3, BCc_DHFS, BCc_AOXSr2 )	42.6471	97.913	68.0949	71.3012	85.8671
KO ( SCc_SHK3Dr, BCc_CHORS, BCc_ANS, SCc_TRPS3, BCc_DHFS, BCc_BTS5 )	42.6471	97.9129	68.0949	71.3012	71.3895
KO ( BCc_SHK3Dr, SCc_CHORS, SCc_ANS, SCc_DHFS, SCc_AOXSr2, SCc_BTS5 )	42.6471	97.8704	74.7483	79.4608	54.3739
KO ( BCc_SHK3Dr, SCc_CHORS, SCc_ANS, SCc_DHFS, BCc_AOXSr2, SCc_BTS5 )	42.6471	97.8701	74.7483	79.4608	85.8671
KO ( BCc_SHK3Dr, SCc_CHORS, SCc_ANS, SCc_DHFS, SCc_AOXSr2, BCc_BTS5 )	42.6471	97.87	74.7483	79.4608	65.4447
KO ( BCc_SHK3Dr, SCc_CHORS, SCc_ANS, SCc_DHFS, BCc_AOXSr2, BCc_BTS5 )	42.6471	97.8698	74.7483	79.4608	58.6592
KO ( BCc_SHK3Dr, SCc_CHORS, SCc_ANS, BCc_TRPS3, SCc_DHFS, SCc_AOXSr2 )	42.6471	97.8605	65.7951	79.4608	66.0877
KO ( BCc_SHK3Dr, SCc_CHORS, SCc_ANS, BCc_TRPS3, SCc_DHFS, SCc_BTS5 )	42.6471	97.8605	65.7951	79.4608	100
KO ( BCc_SHK3Dr, SCc_CHORS, SCc_ANS, BCc_TRPS3, SCc_DHFS, BCc_AOXSr2 )	42.6471	97.8602	65.7951	79.4608	85.8671
KO ( BCc_SHK3Dr, SCc_CHORS, SCc_ANS, BCc_TRPS3, SCc_DHFS, BCc_BTS5 )	42.6471	97.8601	65.7951	79.4608	71.3895
KO ( BCc_SHK3Dr, SCc_CHORS, SCc_ANS, BCc_DHFS, SCc_AOXSr2, SCc_BTS5 )	42.6471	97.8359	74.7483	53.3624	54.3739
KO ( BCc_SHK3Dr, SCc_CHORS, SCc_ANS, BCc_DHFS, BCc_AOXSr2, SCc_BTS5 )	42.6471	97.8356	74.7483	53.3624	85.8671
KO ( BCc_SHK3Dr, SCc_CHORS, SCc_ANS, BCc_DHFS, SCc_AOXSr2, BCc_BTS5 )	42.6471	97.8355	74.7483	53.3624	64.4003
KO ( BCc_SHK3Dr, SCc_CHORS, SCc_ANS, BCc_DHFS, BCc_AOXSr2, BCc_BTS5 )	42.6471	97.8353	74.7483	53.3624	58.6592
KO ( BCc_SHK3Dr, SCc_CHORS, SCc_ANS, BCc_TRPS3, BCc_DHFS, SCc_AOXSr2 )	42.6471	97.826	65.7951	53.3624	66.0877
KO ( BCc_SHK3Dr, SCc_CHORS, SCc_ANS, BCc_TRPS3, BCc_DHFS, SCc_BTS5 )	42.6471	97.826	65.7951	53.3624	100
KO ( BCc_SHK3Dr, SCc_CHORS, SCc_ANS, BCc_TRPS3, BCc_DHFS, BCc_AOXSr2 )	42.6471	97.8257	65.7951	53.3624	85.8671
KO ( BCc_SHK3Dr, SCc_CHORS, SCc_ANS, BCc_TRPS3, BCc_DHFS, BCc_BTS5 )	42.6471	97.8256	65.7951	53.3624	71.3895
KO ( BCc_SHK3Dr, SCc_CHORS, SCc_ANS, SCc_TRPS3, SCc_DHFS, SCc_AOXSr2 )	42.6471	97.7891	69.3226	79.4608	66.0877
KO ( BCc_SHK3Dr, SCc_CHORS, SCc_ANS, SCc_TRPS3, SCc_DHFS, SCc_BTS5 )	42.6471	97.7891	69.3226	79.4608	100
KO ( BCc_SHK3Dr, SCc_CHORS, SCc_ANS, SCc_TRPS3, SCc_DHFS, BCc_AOXSr2 )	42.6471	97.7888	69.3226	79.4608	85.8671
KO ( BCc_SHK3Dr, SCc_CHORS, SCc_ANS, SCc_TRPS3, SCc_DHFS, BCc_BTS5 )	42.6471	97.7887	69.3226	79.4608	71.3895
KO ( BCc_SHK3Dr, SCc_CHORS, SCc_ANS, SCc_TRPS3, BCc_DHFS, SCc_AOXSr2 )	42.6471	97.7546	69.3226	53.3624	66.0877
KO ( BCc_SHK3Dr, SCc_CHORS, SCc_ANS, SCc_TRPS3, BCc_DHFS, SCc_BTS5 )	42.6471	97.7546	69.3226	53.3624	100
KO ( BCc_SHK3Dr, SCc_CHORS, SCc_ANS, SCc_TRPS3, BCc_DHFS, BCc_AOXSr2 )	42.6471	97.7543	69.3226	53.3624	85.8671
KO ( BCc_SHK3Dr, SCc_CHORS, SCc_ANS, SCc_TRPS3, BCc_DHFS, BCc_BTS5 )	42.6471	97.7542	69.3226	53.3624	71.3895
KO ( BCc_SHK3Dr, SCc_CHORS, BCc_ANS, BCc_TRPS3, SCc_DHFS, SCc_AOXSr2 )	42.6471	97.3486	50.3734	79.4608	66.0877
KO ( BCc_SHK3Dr, SCc_CHORS, BCc_ANS, BCc_TRPS3, SCc_DHFS, SCc_BTS5 )	42.6471	97.3486	50.3734	79.4608	100
KO ( BCc_SHK3Dr, SCc_CHORS, BCc_ANS, SCc_DHFS, SCc_AOXSr2, SCc_BTS5 )	42.6471	97.3486	50.3734	79.4608	54.3739
KO ( BCc_SHK3Dr, SCc_CHORS, BCc_ANS, BCc_TRPS3, SCc_DHFS, BCc_AOXSr2 )	42.6471	97.3484	50.3734	79.4608	85.8671
KO ( BCc_SHK3Dr, SCc_CHORS, BCc_ANS, SCc_DHFS, BCc_AOXSr2, SCc_BTS5 )	42.6471	97.3484	50.3734	79.4608	85.8671
KO ( BCc_SHK3Dr, SCc_CHORS, BCc_ANS, BCc_TRPS3, SCc_DHFS, BCc_BTS5 )	42.6471	97.3482	50.3734	79.4608	71.3895
KO ( BCc_SHK3Dr, SCc_CHORS, BCc_ANS, SCc_DHFS, SCc_AOXSr2, BCc_BTS5 )	42.6471	97.3482	50.3734	79.4608	65.4447
KO ( BCc_SHK3Dr, SCc_CHORS, BCc_ANS, SCc_DHFS, BCc_AOXSr2, BCc_BTS5 )	42.6471	97.348	50.3734	79.4608	58.6592
KO ( BCc_SHK3Dr, SCc_CHORS, BCc_ANS, BCc_DHFS, SCc_AOXSr2, SCc_BTS5 )	42.6471	97.3145	50.3734	53.3624	54.3739
KO ( BCc_SHK3Dr, SCc_CHORS, BCc_ANS, BCc_TRPS3, BCc_DHFS, SCc_AOXSr2 )	42.6471	97.3145	50.3734	53.3624	66.0877
KO ( BCc_SHK3Dr, SCc_CHORS, BCc_ANS, BCc_TRPS3, BCc_DHFS, SCc_BTS5 )	42.6471	97.3145	50.3734	53.3624	100
KO ( BCc_SHK3Dr, SCc_CHORS, BCc_ANS, BCc_TRPS3, BCc_DHFS, BCc_AOXSr2 )	42.6471	97.3142	50.3734	53.3624	85.8671
KO ( BCc_SHK3Dr, SCc_CHORS, BCc_ANS, BCc_DHFS, BCc_AOXSr2, SCc_BTS5 )	42.6471	97.3142	50.3734	53.3624	85.8671
KO ( BCc_SHK3Dr, SCc_CHORS, BCc_ANS, BCc_DHFS, SCc_AOXSr2, BCc_BTS5 )	42.6471	97.3141	50.3734	53.3624	64.4003
KO ( BCc_SHK3Dr, SCc_CHORS, BCc_ANS, BCc_TRPS3, BCc_DHFS, BCc_BTS5 )	42.6471	97.3141	50.3734	53.3624	71.3895
KO ( BCc_SHK3Dr, SCc_CHORS, BCc_ANS, BCc_DHFS, BCc_AOXSr2, BCc_BTS5 )	42.6471	97.3139	50.3734	53.3624	58.6592
KO ( BCc_SHK3Dr, SCc_CHORS, BCc_ANS, SCc_TRPS3, SCc_DHFS, SCc_AOXSr2 )	42.6471	96.9147	47.9038	79.4608	66.0877
KO ( BCc_SHK3Dr, SCc_CHORS, BCc_ANS, SCc_TRPS3, SCc_DHFS, SCc_BTS5 )	42.6471	96.9147	47.9038	79.4608	100
KO ( BCc_SHK3Dr, SCc_CHORS, BCc_ANS, SCc_TRPS3, SCc_DHFS, BCc_AOXSr2 )	42.6471	96.9144	47.9038	79.4608	85.8671
KO ( BCc_SHK3Dr, SCc_CHORS, BCc_ANS, SCc_TRPS3, SCc_DHFS, BCc_BTS5 )	42.6471	96.9143	47.9038	79.4608	71.3895
KO ( BCc_SHK3Dr, SCc_CHORS, BCc_ANS, SCc_TRPS3, BCc_DHFS, SCc_AOXSr2 )	42.6471	96.8808	47.9038	53.3624	66.0877
KO ( BCc_SHK3Dr, SCc_CHORS, BCc_ANS, SCc_TRPS3, BCc_DHFS, SCc_BTS5 )	42.6471	96.8808	47.9038	53.3624	100
KO ( BCc_SHK3Dr, SCc_CHORS, BCc_ANS, SCc_TRPS3, BCc_DHFS, BCc_AOXSr2 )	42.6471	96.8806	47.9038	53.3624	85.8671
KO ( BCc_SHK3Dr, SCc_CHORS, BCc_ANS, SCc_TRPS3, BCc_DHFS, BCc_BTS5 )	42.6471	96.8804	47.9038	53.3624	71.3895
KO ( SCc_CHORS, BCc_TRPS3, SCc_DHFS, SCc_AOXSr2, SCc_BTS5 )	41.1765	99.9888	99.8041	93.2524	54.3739
KO ( SCc_CHORS, BCc_TRPS3, SCc_DHFS, BCc_AOXSr2, SCc_BTS5 )	41.1765	99.9885	99.8041	93.2524	85.8671
KO ( SCc_CHORS, BCc_TRPS3, SCc_DHFS, SCc_AOXSr2, BCc_BTS5 )	41.1765	99.9884	99.8041	93.2524	66.0396
KO ( SCc_CHORS, BCc_TRPS3, SCc_DHFS, BCc_AOXSr2, BCc_BTS5 )	41.1765	99.9882	99.8041	93.2524	58.6592
KO ( SCc_CHORS, BCc_TRPS3, BCc_DHFS, SCc_AOXSr2, SCc_BTS5 )	41.1765	99.9528	99.8041	63.2246	54.3739
KO ( SCc_CHORS, BCc_TRPS3, BCc_DHFS, BCc_AOXSr2, SCc_BTS5 )	41.1765	99.9525	99.8041	63.2246	85.8671
KO ( SCc_CHORS, BCc_TRPS3, BCc_DHFS, SCc_AOXSr2, BCc_BTS5 )	41.1765	99.9523	99.8041	63.2246	64.4003
KO ( SCc_CHORS, BCc_TRPS3, BCc_DHFS, BCc_AOXSr2, BCc_BTS5 )	41.1765	99.9521	99.8041	63.2246	58.6592
KO ( SCc_CHORS, SCc_TRPS3, SCc_DHFS, SCc_AOXSr2, SCc_BTS5 )	41.1765	99.9143	69.3226	93.2524	54.3739
KO ( SCc_CHORS, SCc_TRPS3, SCc_DHFS, BCc_AOXSr2, SCc_BTS5 )	41.1765	99.914	69.3226	93.2524	85.8671
KO ( SCc_CHORS, SCc_TRPS3, SCc_DHFS, SCc_AOXSr2, BCc_BTS5 )	41.1765	99.9139	69.3226	93.2524	66.0396
KO ( SCc_CHORS, SCc_TRPS3, SCc_DHFS, BCc_AOXSr2, BCc_BTS5 )	41.1765	99.9136	69.3226	93.2524	58.6592
KO ( SCc_CHORS, SCc_TRPS3, BCc_DHFS, SCc_AOXSr2, SCc_BTS5 )	41.1765	99.8783	69.3226	63.2246	54.3739
KO ( SCc_CHORS, SCc_TRPS3, BCc_DHFS, BCc_AOXSr2, SCc_BTS5 )	41.1765	99.878	69.3226	63.2246	85.8671
KO ( SCc_CHORS, SCc_TRPS3, BCc_DHFS, SCc_AOXSr2, BCc_BTS5 )	41.1765	99.8779	69.3226	63.2246	64.4003
KO ( SCc_CHORS, SCc_TRPS3, BCc_DHFS, BCc_AOXSr2, BCc_BTS5 )	41.1765	99.8777	69.3226	63.2246	58.6592
KO ( BCc_CHORS, BCc_TRPS3, SCc_DHFS, SCc_AOXSr2, SCc_BTS5 )	41.1765	99.6044	75.7557	86.2162	54.3739
KO ( BCc_CHORS, BCc_TRPS3, SCc_DHFS, BCc_AOXSr2, SCc_BTS5 )	41.1765	99.6041	75.7557	86.2162	85.8671
KO ( BCc_CHORS, BCc_TRPS3, SCc_DHFS, SCc_AOXSr2, BCc_BTS5 )	41.1765	99.6039	75.7557	86.2162	64.5949
KO ( BCc_CHORS, BCc_TRPS3, SCc_DHFS, BCc_AOXSr2, BCc_BTS5 )	41.1765	99.6037	75.7557	86.2162	58.6592
KO ( BCc_CHORS, BCc_TRPS3, BCc_DHFS, SCc_AOXSr2, SCc_BTS5 )	41.1765	99.5878	75.7557	71.3012	54.3739
KO ( BCc_CHORS, BCc_TRPS3, BCc_DHFS, BCc_AOXSr2, SCc_BTS5 )	41.1765	99.5875	75.7557	71.3012	85.8671
KO ( BCc_CHORS, BCc_TRPS3, BCc_DHFS, SCc_AOXSr2, BCc_BTS5 )	41.1765	99.5874	75.7557	71.3012	64.4003
KO ( BCc_CHORS, BCc_TRPS3, BCc_DHFS, BCc_AOXSr2, BCc_BTS5 )	41.1765	99.5872	75.7557	71.3012	58.6592
KO ( BCc_CHORS, SCc_TRPS3, SCc_DHFS, SCc_AOXSr2, SCc_BTS5 )	41.1765	99.5173	77.8564	86.2162	54.3739
KO ( BCc_CHORS, SCc_TRPS3, SCc_DHFS, BCc_AOXSr2, SCc_BTS5 )	41.1765	99.517	77.8564	86.2162	85.8671
KO ( BCc_CHORS, SCc_TRPS3, SCc_DHFS, SCc_AOXSr2, BCc_BTS5 )	41.1765	99.5169	77.8564	86.2162	64.5949
KO ( BCc_CHORS, SCc_TRPS3, SCc_DHFS, BCc_AOXSr2, BCc_BTS5 )	41.1765	99.5167	77.8564	86.2162	58.6592
KO ( BCc_CHORS, SCc_TRPS3, BCc_DHFS, SCc_AOXSr2, SCc_BTS5 )	41.1765	99.5008	77.8564	71.3012	54.3739
KO ( BCc_CHORS, SCc_TRPS3, BCc_DHFS, BCc_AOXSr2, SCc_BTS5 )	41.1765	99.5005	77.8564	71.3012	85.8671
KO ( BCc_CHORS, SCc_TRPS3, BCc_DHFS, SCc_AOXSr2, BCc_BTS5 )	41.1765	99.5004	77.8564	71.3012	64.4003
KO ( BCc_CHORS, SCc_TRPS3, BCc_DHFS, BCc_AOXSr2, BCc_BTS5 )	41.1765	99.5002	77.8564	71.3012	58.6592
KO ( SCc_SHK3Dr, SCc_CHORS, SCc_DHFS, SCc_AOXSr2, SCc_BTS5 )	39.7059	99.9992	100	93.2524	54.3739
KO ( SCc_SHK3Dr, SCc_CHORS, SCc_DHFS, BCc_AOXSr2, SCc_BTS5 )	39.7059	99.9989	100	93.2524	85.8671
KO ( SCc_SHK3Dr, SCc_CHORS, SCc_DHFS, SCc_AOXSr2, BCc_BTS5 )	39.7059	99.9987	100	93.2524	66.0396
KO ( SCc_SHK3Dr, SCc_CHORS, SCc_DHFS, BCc_AOXSr2, BCc_BTS5 )	39.7059	99.9985	100	93.2524	58.6592
KO ( SCc_ANS, BCc_TRPS3, SCc_DHFS, SCc_AOXSr2, SCc_BTS5 )	39.7059	99.9888	99.8041	95.6308	54.3739
KO ( SCc_SHK3Dr, SCc_CHORS, BCc_TRPS3, SCc_DHFS, SCc_AOXSr2 )	39.7059	99.9888	99.8041	93.2524	66.0877
KO ( SCc_SHK3Dr, SCc_CHORS, BCc_TRPS3, SCc_DHFS, SCc_BTS5 )	39.7059	99.9888	99.8041	93.2524	100
KO ( SCc_ANS, BCc_TRPS3, SCc_DHFS, BCc_AOXSr2, SCc_BTS5 )	39.7059	99.9885	99.8041	95.6308	85.8671
KO ( SCc_SHK3Dr, SCc_CHORS, BCc_TRPS3, SCc_DHFS, BCc_AOXSr2 )	39.7059	99.9885	99.8041	93.2524	85.8671
KO ( SCc_ANS, BCc_TRPS3, SCc_DHFS, SCc_AOXSr2, BCc_BTS5 )	39.7059	99.9884	99.8041	95.6308	66.0396
KO ( SCc_SHK3Dr, SCc_CHORS, BCc_TRPS3, SCc_DHFS, BCc_BTS5 )	39.7059	99.9884	99.8041	93.2524	71.3895
KO ( SCc_ANS, BCc_TRPS3, SCc_DHFS, BCc_AOXSr2, BCc_BTS5 )	39.7059	99.9882	99.8041	95.6308	58.6592
KO ( SCc_ANS, BCc_TRPS3, BCc_DHFS, SCc_AOXSr2, SCc_BTS5 )	39.7059	99.9706	99.8041	71.3012	54.3739
KO ( SCc_ANS, BCc_TRPS3, BCc_DHFS, BCc_AOXSr2, SCc_BTS5 )	39.7059	99.9703	99.8041	71.3012	85.8671
KO ( SCc_ANS, BCc_TRPS3, BCc_DHFS, SCc_AOXSr2, BCc_BTS5 )	39.7059	99.9701	99.8041	71.3012	64.4003
KO ( SCc_ANS, BCc_TRPS3, BCc_DHFS, BCc_AOXSr2, BCc_BTS5 )	39.7059	99.9699	99.8041	71.3012	58.6592
KO ( SCc_SHK3Dr, SCc_CHORS, BCc_DHFS, SCc_AOXSr2, SCc_BTS5 )	39.7059	99.9631	100	63.2246	54.3739
KO ( SCc_SHK3Dr, SCc_CHORS, BCc_DHFS, BCc_AOXSr2, SCc_BTS5 )	39.7059	99.9628	100	63.2246	85.8671
KO ( SCc_SHK3Dr, SCc_CHORS, BCc_DHFS, SCc_AOXSr2, BCc_BTS5 )	39.7059	99.9627	100	63.2246	64.4003
KO ( SCc_SHK3Dr, SCc_CHORS, BCc_DHFS, BCc_AOXSr2, BCc_BTS5 )	39.7059	99.9625	100	63.2246	58.6592
KO ( BCc_ANS, BCc_TRPS3, SCc_DHFS, SCc_AOXSr2, SCc_BTS5 )	39.7059	99.9572	75.7557	95.6308	54.3739
KO ( BCc_ANS, BCc_TRPS3, SCc_DHFS, BCc_AOXSr2, SCc_BTS5 )	39.7059	99.9569	75.7557	95.6308	85.8671
KO ( BCc_ANS, BCc_TRPS3, SCc_DHFS, SCc_AOXSr2, BCc_BTS5 )	39.7059	99.9568	75.7557	95.6308	66.0396
KO ( BCc_ANS, BCc_TRPS3, SCc_DHFS, BCc_AOXSr2, BCc_BTS5 )	39.7059	99.9566	75.7557	95.6308	58.6592
KO ( SCc_SHK3Dr, SCc_CHORS, BCc_TRPS3, BCc_DHFS, SCc_AOXSr2 )	39.7059	99.9528	99.8041	63.2246	66.0877
KO ( SCc_SHK3Dr, SCc_CHORS, BCc_TRPS3, BCc_DHFS, SCc_BTS5 )	39.7059	99.9528	99.8041	63.2246	100
KO ( SCc_SHK3Dr, SCc_CHORS, BCc_TRPS3, BCc_DHFS, BCc_AOXSr2 )	39.7059	99.9525	99.8041	63.2246	85.8671
KO ( SCc_SHK3Dr, SCc_CHORS, BCc_TRPS3, BCc_DHFS, BCc_BTS5 )	39.7059	99.9523	99.8041	63.2246	71.3895
KO ( BCc_ANS, BCc_TRPS3, BCc_DHFS, SCc_AOXSr2, SCc_BTS5 )	39.7059	99.939	75.7557	71.3012	54.3739
KO ( BCc_ANS, BCc_TRPS3, BCc_DHFS, BCc_AOXSr2, SCc_BTS5 )	39.7059	99.9387	75.7557	71.3012	85.8671
KO ( BCc_ANS, BCc_TRPS3, BCc_DHFS, SCc_AOXSr2, BCc_BTS5 )	39.7059	99.9385	75.7557	71.3012	64.4003
KO ( BCc_ANS, BCc_TRPS3, BCc_DHFS, BCc_AOXSr2, BCc_BTS5 )	39.7059	99.9383	75.7557	71.3012	58.6592
KO ( SCc_ANS, SCc_TRPS3, SCc_DHFS, SCc_AOXSr2, SCc_BTS5 )	39.7059	99.9143	79.562	95.6308	54.3739
KO ( SCc_SHK3Dr, SCc_CHORS, SCc_TRPS3, SCc_DHFS, SCc_AOXSr2 )	39.7059	99.9143	64.666	93.2524	66.0877
KO ( SCc_SHK3Dr, SCc_CHORS, SCc_TRPS3, SCc_DHFS, SCc_BTS5 )	39.7059	99.9143	64.666	93.2524	100
KO ( SCc_ANS, SCc_TRPS3, SCc_DHFS, BCc_AOXSr2, SCc_BTS5 )	39.7059	99.914	79.562	95.6308	85.8671
KO ( SCc_SHK3Dr, SCc_CHORS, SCc_TRPS3, SCc_DHFS, BCc_AOXSr2 )	39.7059	99.914	64.666	93.2524	85.8671
KO ( SCc_ANS, SCc_TRPS3, SCc_DHFS, SCc_AOXSr2, BCc_BTS5 )	39.7059	99.9139	79.562	95.6308	66.0396
KO ( SCc_SHK3Dr, SCc_CHORS, SCc_TRPS3, SCc_DHFS, BCc_BTS5 )	39.7059	99.9139	64.666	93.2524	71.3895
KO ( SCc_ANS, SCc_TRPS3, SCc_DHFS, BCc_AOXSr2, BCc_BTS5 )	39.7059	99.9136	79.562	95.6308	58.6592
KO ( SCc_ANS, SCc_TRPS3, BCc_DHFS, SCc_AOXSr2, SCc_BTS5 )	39.7059	99.896	79.562	71.3012	54.3739
KO ( SCc_ANS, SCc_TRPS3, BCc_DHFS, BCc_AOXSr2, SCc_BTS5 )	39.7059	99.8958	79.562	71.3012	85.8671
KO ( SCc_ANS, SCc_TRPS3, BCc_DHFS, SCc_AOXSr2, BCc_BTS5 )	39.7059	99.8956	79.562	71.3012	64.4003
KO ( SCc_ANS, SCc_TRPS3, BCc_DHFS, BCc_AOXSr2, BCc_BTS5 )	39.7059	99.8954	79.562	71.3012	58.6592
KO ( SCc_SHK3Dr, SCc_CHORS, SCc_TRPS3, BCc_DHFS, SCc_AOXSr2 )	39.7059	99.8783	64.666	63.2246	66.0877
KO ( SCc_SHK3Dr, SCc_CHORS, SCc_TRPS3, BCc_DHFS, SCc_BTS5 )	39.7059	99.8783	64.666	63.2246	100
KO ( SCc_SHK3Dr, SCc_CHORS, SCc_TRPS3, BCc_DHFS, BCc_AOXSr2 )	39.7059	99.878	64.666	63.2246	85.8671
KO ( SCc_SHK3Dr, SCc_CHORS, SCc_TRPS3, BCc_DHFS, BCc_BTS5 )	39.7059	99.8779	64.666	63.2246	71.3895
KO ( BCc_SHK3Dr, BCc_CHORS, BCc_TRPS3, SCc_DHFS, SCc_AOXSr2 )	39.7059	99.6044	64.421	73.149	66.0877
KO ( BCc_SHK3Dr, BCc_CHORS, BCc_TRPS3, SCc_DHFS, SCc_BTS5 )	39.7059	99.6044	64.421	73.149	100
KO ( BCc_SHK3Dr, BCc_CHORS, SCc_DHFS, SCc_AOXSr2, SCc_BTS5 )	39.7059	99.6044	75.163	73.149	54.3739
KO ( BCc_SHK3Dr, BCc_CHORS, SCc_DHFS, BCc_AOXSr2, SCc_BTS5 )	39.7059	99.6041	75.163	73.149	85.8671
KO ( BCc_SHK3Dr, BCc_CHORS, BCc_TRPS3, SCc_DHFS, BCc_AOXSr2 )	39.7059	99.6041	64.421	73.149	85.8671
KO ( BCc_SHK3Dr, BCc_CHORS, BCc_TRPS3, SCc_DHFS, BCc_BTS5 )	39.7059	99.6039	64.421	73.149	71.3895
KO ( BCc_SHK3Dr, BCc_CHORS, SCc_DHFS, SCc_AOXSr2, BCc_BTS5 )	39.7059	99.6039	75.163	73.149	64.5949
KO ( BCc_SHK3Dr, BCc_CHORS, SCc_DHFS, BCc_AOXSr2, BCc_BTS5 )	39.7059	99.6037	75.163	73.149	58.6592
KO ( BCc_SHK3Dr, BCc_CHORS, BCc_DHFS, SCc_AOXSr2, SCc_BTS5 )	39.7059	99.5878	75.163	63.8108	54.3739
KO ( BCc_SHK3Dr, BCc_CHORS, BCc_TRPS3, BCc_DHFS, SCc_AOXSr2 )	39.7059	99.5878	64.421	63.8108	66.0877
KO ( BCc_SHK3Dr, BCc_CHORS, BCc_TRPS3, BCc_DHFS, SCc_BTS5 )	39.7059	99.5878	64.421	63.8108	100
KO ( BCc_SHK3Dr, BCc_CHORS, BCc_DHFS, BCc_AOXSr2, SCc_BTS5 )	39.7059	99.5875	75.163	63.8108	85.8671
KO ( BCc_SHK3Dr, BCc_CHORS, BCc_TRPS3, BCc_DHFS, BCc_AOXSr2 )	39.7059	99.5875	64.421	63.8108	85.8671
KO ( BCc_SHK3Dr, BCc_CHORS, BCc_TRPS3, BCc_DHFS, BCc_BTS5 )	39.7059	99.5874	64.421	63.8108	71.3895
KO ( BCc_SHK3Dr, BCc_CHORS, BCc_DHFS, SCc_AOXSr2, BCc_BTS5 )	39.7059	99.5874	75.163	63.8108	64.4003
KO ( BCc_SHK3Dr, BCc_CHORS, BCc_DHFS, BCc_AOXSr2, BCc_BTS5 )	39.7059	99.5872	75.163	63.8108	58.6592
KO ( BCc_SHK3Dr, BCc_CHORS, SCc_TRPS3, SCc_DHFS, SCc_AOXSr2 )	39.7059	99.5173	75.163	73.149	66.0877
KO ( BCc_SHK3Dr, BCc_CHORS, SCc_TRPS3, SCc_DHFS, SCc_BTS5 )	39.7059	99.5173	75.163	73.149	100
KO ( BCc_SHK3Dr, BCc_CHORS, SCc_TRPS3, SCc_DHFS, BCc_AOXSr2 )	39.7059	99.517	75.163	73.149	85.8671
KO ( BCc_SHK3Dr, BCc_CHORS, SCc_TRPS3, SCc_DHFS, BCc_BTS5 )	39.7059	99.5169	75.163	73.149	71.3895
KO ( BCc_SHK3Dr, BCc_CHORS, SCc_TRPS3, BCc_DHFS, SCc_AOXSr2 )	39.7059	99.5008	75.163	63.8108	66.0877
KO ( BCc_SHK3Dr, BCc_CHORS, SCc_TRPS3, BCc_DHFS, SCc_BTS5 )	39.7059	99.5008	75.163	63.8108	100
KO ( BCc_SHK3Dr, BCc_CHORS, SCc_TRPS3, BCc_DHFS, BCc_AOXSr2 )	39.7059	99.5005	75.163	63.8108	85.8671
KO ( BCc_SHK3Dr, BCc_CHORS, SCc_TRPS3, BCc_DHFS, BCc_BTS5 )	39.7059	99.5004	75.163	63.8108	71.3895
KO ( BCc_ANS, SCc_TRPS3, SCc_DHFS, SCc_AOXSr2, SCc_BTS5 )	39.7059	99.4998	69.0952	95.6308	54.3739
KO ( BCc_ANS, SCc_TRPS3, SCc_DHFS, BCc_AOXSr2, SCc_BTS5 )	39.7059	99.4995	69.0952	95.6308	85.8671
KO ( BCc_ANS, SCc_TRPS3, SCc_DHFS, SCc_AOXSr2, BCc_BTS5 )	39.7059	99.4993	69.0952	95.6308	66.0396
KO ( BCc_ANS, SCc_TRPS3, SCc_DHFS, BCc_AOXSr2, BCc_BTS5 )	39.7059	99.4991	69.0952	95.6308	58.6592
KO ( BCc_ANS, SCc_TRPS3, BCc_DHFS, SCc_AOXSr2, SCc_BTS5 )	39.7059	99.4817	69.0952	71.3012	54.3739
KO ( BCc_ANS, SCc_TRPS3, BCc_DHFS, BCc_AOXSr2, SCc_BTS5 )	39.7059	99.4814	69.0952	71.3012	85.8671
KO ( BCc_ANS, SCc_TRPS3, BCc_DHFS, SCc_AOXSr2, BCc_BTS5 )	39.7059	99.4813	69.0952	71.3012	64.4003
KO ( BCc_ANS, SCc_TRPS3, BCc_DHFS, BCc_AOXSr2, BCc_BTS5 )	39.7059	99.4811	69.0952	71.3012	58.6592
KO ( SCc_SHK3Dr, BCc_CHORS, BCc_TRPS3, SCc_DHFS, SCc_AOXSr2 )	39.7059	98.3724	75.7557	86.2162	66.0877
KO ( SCc_SHK3Dr, BCc_CHORS, BCc_TRPS3, SCc_DHFS, SCc_BTS5 )	39.7059	98.3724	75.7557	86.2162	100
KO ( SCc_SHK3Dr, BCc_CHORS, SCc_DHFS, SCc_AOXSr2, SCc_BTS5 )	39.7059	98.3724	86.3667	86.2162	54.3739
KO ( SCc_SHK3Dr, BCc_CHORS, BCc_TRPS3, SCc_DHFS, BCc_AOXSr2 )	39.7059	98.3721	75.7557	86.2162	85.8671
KO ( SCc_SHK3Dr, BCc_CHORS, SCc_DHFS, BCc_AOXSr2, SCc_BTS5 )	39.7059	98.3721	86.3667	86.2162	85.8671
KO ( SCc_SHK3Dr, BCc_CHORS, SCc_DHFS, SCc_AOXSr2, BCc_BTS5 )	39.7059	98.372	86.3667	86.2162	64.4003
KO ( SCc_SHK3Dr, BCc_CHORS, BCc_TRPS3, SCc_DHFS, BCc_BTS5 )	39.7059	98.372	75.7557	86.2162	71.3895
KO ( SCc_SHK3Dr, BCc_CHORS, SCc_DHFS, BCc_AOXSr2, BCc_BTS5 )	39.7059	98.3717	86.3667	86.2162	58.6592
KO ( SCc_SHK3Dr, BCc_CHORS, BCc_TRPS3, BCc_DHFS, SCc_AOXSr2 )	39.7059	98.3562	75.7557	71.3012	66.0877
KO ( SCc_SHK3Dr, BCc_CHORS, BCc_TRPS3, BCc_DHFS, SCc_BTS5 )	39.7059	98.3562	75.7557	71.3012	100
KO ( SCc_SHK3Dr, BCc_CHORS, BCc_DHFS, SCc_AOXSr2, SCc_BTS5 )	39.7059	98.3562	86.3667	71.3012	54.3739
KO ( SCc_SHK3Dr, BCc_CHORS, BCc_TRPS3, BCc_DHFS, BCc_AOXSr2 )	39.7059	98.3559	75.7557	71.3012	85.8671
KO ( SCc_SHK3Dr, BCc_CHORS, BCc_DHFS, BCc_AOXSr2, SCc_BTS5 )	39.7059	98.3559	86.3667	71.3012	85.8671
KO ( SCc_SHK3Dr, BCc_CHORS, BCc_DHFS, SCc_AOXSr2, BCc_BTS5 )	39.7059	98.3558	86.3667	71.3012	64.4003
KO ( SCc_SHK3Dr, BCc_CHORS, BCc_TRPS3, BCc_DHFS, BCc_BTS5 )	39.7059	98.3558	75.7557	71.3012	71.3895
KO ( SCc_SHK3Dr, BCc_CHORS, BCc_DHFS, BCc_AOXSr2, BCc_BTS5 )	39.7059	98.3556	86.3667	71.3012	58.6592
KO ( SCc_SHK3Dr, BCc_CHORS, SCc_TRPS3, SCc_DHFS, SCc_AOXSr2 )	39.7059	98.2875	70.5483	86.2162	66.0877
KO ( SCc_SHK3Dr, BCc_CHORS, SCc_TRPS3, SCc_DHFS, SCc_BTS5 )	39.7059	98.2875	70.5483	86.2162	100
KO ( SCc_SHK3Dr, BCc_CHORS, SCc_TRPS3, SCc_DHFS, BCc_AOXSr2 )	39.7059	98.2872	70.5483	86.2162	85.8671
KO ( SCc_SHK3Dr, BCc_CHORS, SCc_TRPS3, SCc_DHFS, BCc_BTS5 )	39.7059	98.287	70.5483	86.2162	71.3895
KO ( SCc_SHK3Dr, BCc_CHORS, SCc_TRPS3, BCc_DHFS, SCc_AOXSr2 )	39.7059	98.2713	70.5483	71.3012	66.0877
KO ( SCc_SHK3Dr, BCc_CHORS, SCc_TRPS3, BCc_DHFS, SCc_BTS5 )	39.7059	98.2713	70.5483	71.3012	100
KO ( SCc_SHK3Dr, BCc_CHORS, SCc_TRPS3, BCc_DHFS, BCc_AOXSr2 )	39.7059	98.2711	70.5483	71.3012	85.8671
KO ( SCc_SHK3Dr, BCc_CHORS, SCc_TRPS3, BCc_DHFS, BCc_BTS5 )	39.7059	98.2709	70.5483	71.3012	71.3895
KO ( BCc_SHK3Dr, SCc_CHORS, SCc_DHFS, SCc_AOXSr2, SCc_BTS5 )	39.7059	97.8704	74.7483	79.4608	54.3739
KO ( BCc_SHK3Dr, SCc_CHORS, SCc_DHFS, BCc_AOXSr2, SCc_BTS5 )	39.7059	97.8701	74.7483	79.4608	85.8671
KO ( BCc_SHK3Dr, SCc_CHORS, SCc_DHFS, SCc_AOXSr2, BCc_BTS5 )	39.7059	97.87	74.7483	79.4608	65.4447
KO ( BCc_SHK3Dr, SCc_CHORS, SCc_DHFS, BCc_AOXSr2, BCc_BTS5 )	39.7059	97.8698	74.7483	79.4608	58.6592
KO ( BCc_SHK3Dr, SCc_CHORS, BCc_TRPS3, SCc_DHFS, SCc_AOXSr2 )	39.7059	97.8605	65.7951	79.4608	66.0877
KO ( BCc_SHK3Dr, SCc_CHORS, BCc_TRPS3, SCc_DHFS, SCc_BTS5 )	39.7059	97.8605	65.7951	79.4608	100
KO ( BCc_SHK3Dr, SCc_CHORS, BCc_TRPS3, SCc_DHFS, BCc_AOXSr2 )	39.7059	97.8602	65.7951	79.4608	85.8671
KO ( BCc_SHK3Dr, SCc_CHORS, BCc_TRPS3, SCc_DHFS, BCc_BTS5 )	39.7059	97.8601	65.7951	79.4608	71.3895
KO ( BCc_SHK3Dr, SCc_CHORS, BCc_DHFS, SCc_AOXSr2, SCc_BTS5 )	39.7059	97.8359	74.7483	53.3624	54.3739
KO ( BCc_SHK3Dr, SCc_CHORS, BCc_DHFS, BCc_AOXSr2, SCc_BTS5 )	39.7059	97.8356	74.7483	53.3624	85.8671
KO ( BCc_SHK3Dr, SCc_CHORS, BCc_DHFS, SCc_AOXSr2, BCc_BTS5 )	39.7059	97.8355	74.7483	53.3624	64.4003
KO ( BCc_SHK3Dr, SCc_CHORS, BCc_DHFS, BCc_AOXSr2, BCc_BTS5 )	39.7059	97.8353	74.7483	53.3624	58.6592
KO ( BCc_SHK3Dr, SCc_CHORS, BCc_TRPS3, BCc_DHFS, SCc_AOXSr2 )	39.7059	97.826	65.7951	53.3624	66.0877
KO ( BCc_SHK3Dr, SCc_CHORS, BCc_TRPS3, BCc_DHFS, SCc_BTS5 )	39.7059	97.826	65.7951	53.3624	100
KO ( BCc_SHK3Dr, SCc_CHORS, BCc_TRPS3, BCc_DHFS, BCc_AOXSr2 )	39.7059	97.8257	65.7951	53.3624	85.8671
KO ( BCc_SHK3Dr, SCc_CHORS, BCc_TRPS3, BCc_DHFS, BCc_BTS5 )	39.7059	97.8256	65.7951	53.3624	71.3895
KO ( BCc_SHK3Dr, SCc_CHORS, SCc_TRPS3, SCc_DHFS, SCc_AOXSr2 )	39.7059	97.7891	69.3226	79.4608	66.0877
KO ( BCc_SHK3Dr, SCc_CHORS, SCc_TRPS3, SCc_DHFS, SCc_BTS5 )	39.7059	97.7891	69.3226	79.4608	100
KO ( BCc_SHK3Dr, SCc_CHORS, SCc_TRPS3, SCc_DHFS, BCc_AOXSr2 )	39.7059	97.7888	69.3226	79.4608	85.8671
KO ( BCc_SHK3Dr, SCc_CHORS, SCc_TRPS3, SCc_DHFS, BCc_BTS5 )	39.7059	97.7887	69.3226	79.4608	71.3895
KO ( BCc_SHK3Dr, SCc_CHORS, SCc_TRPS3, BCc_DHFS, SCc_AOXSr2 )	39.7059	97.7546	69.3226	53.3624	66.0877
KO ( BCc_SHK3Dr, SCc_CHORS, SCc_TRPS3, BCc_DHFS, SCc_BTS5 )	39.7059	97.7546	69.3226	53.3624	100
KO ( BCc_SHK3Dr, SCc_CHORS, SCc_TRPS3, BCc_DHFS, BCc_AOXSr2 )	39.7059	97.7543	69.3226	53.3624	85.8671
KO ( BCc_SHK3Dr, SCc_CHORS, SCc_TRPS3, BCc_DHFS, BCc_BTS5 )	39.7059	97.7542	69.3226	53.3624	71.3895
KO ( SCc_SHK3Dr, SCc_ANS, SCc_DHFS, SCc_AOXSr2, SCc_BTS5 )	38.2353	99.9992	100	93.2524	54.3739
KO ( SCc_SHK3Dr, SCc_ANS, SCc_DHFS, BCc_AOXSr2, SCc_BTS5 )	38.2353	99.9989	100	93.2524	85.8671
KO ( SCc_SHK3Dr, SCc_ANS, SCc_DHFS, SCc_AOXSr2, BCc_BTS5 )	38.2353	99.9987	100	93.2524	66.0396
KO ( SCc_SHK3Dr, SCc_ANS, SCc_DHFS, BCc_AOXSr2, BCc_BTS5 )	38.2353	99.9985	100	93.2524	58.6592
KO ( SCc_SHK3Dr, SCc_ANS, BCc_TRPS3, SCc_DHFS, SCc_AOXSr2 )	38.2353	99.9888	99.8041	93.2524	66.0877
KO ( SCc_SHK3Dr, SCc_ANS, BCc_TRPS3, SCc_DHFS, SCc_BTS5 )	38.2353	99.9888	99.8041	93.2524	100
KO ( SCc_SHK3Dr, SCc_ANS, BCc_TRPS3, SCc_DHFS, BCc_AOXSr2 )	38.2353	99.9885	99.8041	93.2524	85.8671
KO ( SCc_SHK3Dr, SCc_ANS, BCc_TRPS3, SCc_DHFS, BCc_BTS5 )	38.2353	99.9884	99.8041	93.2524	71.3895
KO ( SCc_SHK3Dr, SCc_ANS, BCc_DHFS, SCc_AOXSr2, SCc_BTS5 )	38.2353	99.9759	100	71.3012	54.3739
KO ( SCc_SHK3Dr, SCc_ANS, BCc_DHFS, BCc_AOXSr2, SCc_BTS5 )	38.2353	99.9757	100	71.3012	85.8671
KO ( SCc_SHK3Dr, SCc_ANS, BCc_DHFS, SCc_AOXSr2, BCc_BTS5 )	38.2353	99.9755	100	71.3012	64.4003
KO ( SCc_SHK3Dr, SCc_ANS, BCc_DHFS, BCc_AOXSr2, BCc_BTS5 )	38.2353	99.9753	100	71.3012	58.6592
KO ( SCc_SHK3Dr, SCc_ANS, BCc_TRPS3, BCc_DHFS, SCc_AOXSr2 )	38.2353	99.9656	99.8041	71.3012	66.0877
KO ( SCc_SHK3Dr, SCc_ANS, BCc_TRPS3, BCc_DHFS, SCc_BTS5 )	38.2353	99.9656	99.8041	71.3012	100
KO ( SCc_SHK3Dr, SCc_ANS, BCc_TRPS3, BCc_DHFS, BCc_AOXSr2 )	38.2353	99.9653	99.8041	71.3012	85.8671
KO ( SCc_SHK3Dr, SCc_ANS, BCc_TRPS3, BCc_DHFS, BCc_BTS5 )	38.2353	99.9652	99.8041	71.3012	71.3895
KO ( SCc_SHK3Dr, SCc_ANS, SCc_TRPS3, SCc_DHFS, SCc_AOXSr2 )	38.2353	99.9143	64.666	93.2524	66.0877
KO ( SCc_SHK3Dr, SCc_ANS, SCc_TRPS3, SCc_DHFS, SCc_BTS5 )	38.2353	99.9143	64.666	93.2524	100
KO ( SCc_SHK3Dr, SCc_ANS, SCc_TRPS3, SCc_DHFS, BCc_AOXSr2 )	38.2353	99.914	64.666	93.2524	85.8671
KO ( SCc_SHK3Dr, SCc_ANS, SCc_TRPS3, SCc_DHFS, BCc_BTS5 )	38.2353	99.9139	64.666	93.2524	71.3895
KO ( SCc_SHK3Dr, SCc_ANS, SCc_TRPS3, BCc_DHFS, SCc_AOXSr2 )	38.2353	99.8911	64.666	71.3012	66.0877
KO ( SCc_SHK3Dr, SCc_ANS, SCc_TRPS3, BCc_DHFS, SCc_BTS5 )	38.2353	99.8911	64.666	71.3012	100
KO ( SCc_SHK3Dr, SCc_ANS, SCc_TRPS3, BCc_DHFS, BCc_AOXSr2 )	38.2353	99.8908	64.666	71.3012	85.8671
KO ( SCc_SHK3Dr, SCc_ANS, SCc_TRPS3, BCc_DHFS, BCc_BTS5 )	38.2353	99.8907	64.666	71.3012	71.3895
KO ( SCc_SHK3Dr, BCc_ANS, BCc_TRPS3, SCc_DHFS, SCc_AOXSr2 )	38.2353	99.8164	75.7557	93.2524	66.0877
KO ( SCc_SHK3Dr, BCc_ANS, BCc_TRPS3, SCc_DHFS, SCc_BTS5 )	38.2353	99.8164	75.7557	93.2524	100
KO ( SCc_SHK3Dr, BCc_ANS, SCc_DHFS, SCc_AOXSr2, SCc_BTS5 )	38.2353	99.8164	75.9926	93.2524	54.3739
KO ( SCc_SHK3Dr, BCc_ANS, BCc_TRPS3, SCc_DHFS, BCc_AOXSr2 )	38.2353	99.8161	75.7557	93.2524	85.8671
KO ( SCc_SHK3Dr, BCc_ANS, SCc_DHFS, BCc_AOXSr2, SCc_BTS5 )	38.2353	99.8161	75.9926	93.2524	85.8671
KO ( SCc_SHK3Dr, BCc_ANS, SCc_DHFS, SCc_AOXSr2, BCc_BTS5 )	38.2353	99.816	75.9926	93.2524	66.0396
KO ( SCc_SHK3Dr, BCc_ANS, BCc_TRPS3, SCc_DHFS, BCc_BTS5 )	38.2353	99.816	75.7557	93.2524	71.3895
KO ( SCc_SHK3Dr, BCc_ANS, SCc_DHFS, BCc_AOXSr2, BCc_BTS5 )	38.2353	99.8158	75.9926	93.2524	58.6592
KO ( SCc_SHK3Dr, BCc_ANS, BCc_DHFS, SCc_AOXSr2, SCc_BTS5 )	38.2353	99.7932	75.9926	71.3012	54.3739
KO ( SCc_SHK3Dr, BCc_ANS, BCc_TRPS3, BCc_DHFS, SCc_AOXSr2 )	38.2353	99.7932	75.7557	71.3012	66.0877
KO ( SCc_SHK3Dr, BCc_ANS, BCc_TRPS3, BCc_DHFS, SCc_BTS5 )	38.2353	99.7932	75.7557	71.3012	100
KO ( SCc_SHK3Dr, BCc_ANS, BCc_DHFS, BCc_AOXSr2, SCc_BTS5 )	38.2353	99.793	75.9926	71.3012	85.8671
KO ( SCc_SHK3Dr, BCc_ANS, BCc_TRPS3, BCc_DHFS, BCc_AOXSr2 )	38.2353	99.793	75.7557	71.3012	85.8671
KO ( SCc_SHK3Dr, BCc_ANS, BCc_TRPS3, BCc_DHFS, BCc_BTS5 )	38.2353	99.7928	75.7557	71.3012	71.3895
KO ( SCc_SHK3Dr, BCc_ANS, BCc_DHFS, SCc_AOXSr2, BCc_BTS5 )	38.2353	99.7928	75.9926	71.3012	64.4003
KO ( SCc_SHK3Dr, BCc_ANS, BCc_DHFS, BCc_AOXSr2, BCc_BTS5 )	38.2353	99.7926	75.9926	71.3012	58.6592
KO ( BCc_SHK3Dr, BCc_ANS, BCc_TRPS3, SCc_DHFS, SCc_AOXSr2 )	38.2353	99.6044	64.421	79.4608	66.0877
KO ( BCc_SHK3Dr, BCc_ANS, BCc_TRPS3, SCc_DHFS, SCc_BTS5 )	38.2353	99.6044	64.421	79.4608	100
KO ( BCc_SHK3Dr, BCc_ANS, SCc_DHFS, SCc_AOXSr2, SCc_BTS5 )	38.2353	99.6044	64.421	79.4608	54.3739
KO ( BCc_SHK3Dr, BCc_ANS, SCc_DHFS, BCc_AOXSr2, SCc_BTS5 )	38.2353	99.6041	64.421	79.4608	85.8671
KO ( BCc_SHK3Dr, BCc_ANS, BCc_TRPS3, SCc_DHFS, BCc_AOXSr2 )	38.2353	99.6041	64.421	79.4608	85.8671
KO ( BCc_SHK3Dr, BCc_ANS, BCc_TRPS3, SCc_DHFS, BCc_BTS5 )	38.2353	99.6039	64.421	79.4608	71.3895
KO ( BCc_SHK3Dr, BCc_ANS, SCc_DHFS, SCc_AOXSr2, BCc_BTS5 )	38.2353	99.6039	64.421	79.4608	65.4447
KO ( BCc_SHK3Dr, BCc_ANS, SCc_DHFS, BCc_AOXSr2, BCc_BTS5 )	38.2353	99.6037	64.421	79.4608	58.6592
KO ( BCc_SHK3Dr, SCc_ANS, SCc_DHFS, SCc_AOXSr2, SCc_BTS5 )	38.2353	99.6015	75.922	79.4608	54.3739
KO ( BCc_SHK3Dr, SCc_ANS, SCc_DHFS, BCc_AOXSr2, SCc_BTS5 )	38.2353	99.6012	75.922	79.4608	85.8671
KO ( BCc_SHK3Dr, SCc_ANS, SCc_DHFS, SCc_AOXSr2, BCc_BTS5 )	38.2353	99.6011	75.922	79.4608	65.4447
KO ( BCc_SHK3Dr, SCc_ANS, SCc_DHFS, BCc_AOXSr2, BCc_BTS5 )	38.2353	99.6009	75.922	79.4608	58.6592
KO ( BCc_SHK3Dr, SCc_ANS, BCc_TRPS3, SCc_DHFS, SCc_AOXSr2 )	38.2353	99.5913	65.7951	79.4608	66.0877
KO ( BCc_SHK3Dr, SCc_ANS, BCc_TRPS3, SCc_DHFS, SCc_BTS5 )	38.2353	99.5913	65.7951	79.4608	100
KO ( BCc_SHK3Dr, SCc_ANS, BCc_TRPS3, SCc_DHFS, BCc_AOXSr2 )	38.2353	99.591	65.7951	79.4608	85.8671
KO ( BCc_SHK3Dr, SCc_ANS, BCc_TRPS3, SCc_DHFS, BCc_BTS5 )	38.2353	99.5908	65.7951	79.4608	71.3895
KO ( BCc_SHK3Dr, BCc_ANS, BCc_DHFS, SCc_AOXSr2, SCc_BTS5 )	38.2353	99.5878	64.421	63.8108	54.3739
KO ( BCc_SHK3Dr, BCc_ANS, BCc_TRPS3, BCc_DHFS, SCc_AOXSr2 )	38.2353	99.5878	64.421	63.8108	66.0877
KO ( BCc_SHK3Dr, BCc_ANS, BCc_TRPS3, BCc_DHFS, SCc_BTS5 )	38.2353	99.5878	64.421	63.8108	100
KO ( BCc_SHK3Dr, BCc_ANS, BCc_TRPS3, BCc_DHFS, BCc_AOXSr2 )	38.2353	99.5875	64.421	63.8108	85.8671
KO ( BCc_SHK3Dr, BCc_ANS, BCc_DHFS, BCc_AOXSr2, SCc_BTS5 )	38.2353	99.5875	64.421	63.8108	85.8671
KO ( BCc_SHK3Dr, BCc_ANS, BCc_TRPS3, BCc_DHFS, BCc_BTS5 )	38.2353	99.5874	64.421	63.8108	71.3895
KO ( BCc_SHK3Dr, BCc_ANS, BCc_DHFS, SCc_AOXSr2, BCc_BTS5 )	38.2353	99.5874	64.421	63.8108	64.4003
KO ( BCc_SHK3Dr, BCc_ANS, BCc_DHFS, BCc_AOXSr2, BCc_BTS5 )	38.2353	99.5872	64.421	63.8108	58.6592
KO ( BCc_SHK3Dr, SCc_ANS, BCc_DHFS, SCc_AOXSr2, SCc_BTS5 )	38.2353	99.585	75.922	63.8108	54.3739
KO ( BCc_SHK3Dr, SCc_ANS, BCc_DHFS, BCc_AOXSr2, SCc_BTS5 )	38.2353	99.5847	75.922	63.8108	85.8671
KO ( BCc_SHK3Dr, SCc_ANS, BCc_DHFS, SCc_AOXSr2, BCc_BTS5 )	38.2353	99.5846	75.922	63.8108	64.4003
KO ( BCc_SHK3Dr, SCc_ANS, BCc_DHFS, BCc_AOXSr2, BCc_BTS5 )	38.2353	99.5843	75.922	63.8108	58.6592
KO ( BCc_SHK3Dr, SCc_ANS, BCc_TRPS3, BCc_DHFS, SCc_AOXSr2 )	38.2353	99.5747	65.7951	63.8108	66.0877
KO ( BCc_SHK3Dr, SCc_ANS, BCc_TRPS3, BCc_DHFS, SCc_BTS5 )	38.2353	99.5747	65.7951	63.8108	100
KO ( BCc_SHK3Dr, SCc_ANS, BCc_TRPS3, BCc_DHFS, BCc_AOXSr2 )	38.2353	99.5744	65.7951	63.8108	85.8671
KO ( BCc_SHK3Dr, SCc_ANS, BCc_TRPS3, BCc_DHFS, BCc_BTS5 )	38.2353	99.5743	65.7951	63.8108	71.3895
KO ( BCc_SHK3Dr, SCc_ANS, SCc_TRPS3, SCc_DHFS, SCc_AOXSr2 )	38.2353	99.5173	75.922	79.4608	66.0877
KO ( BCc_SHK3Dr, SCc_ANS, SCc_TRPS3, SCc_DHFS, SCc_BTS5 )	38.2353	99.5173	75.922	79.4608	100
KO ( BCc_SHK3Dr, SCc_ANS, SCc_TRPS3, SCc_DHFS, BCc_AOXSr2 )	38.2353	99.517	75.922	79.4608	85.8671
KO ( BCc_SHK3Dr, SCc_ANS, SCc_TRPS3, SCc_DHFS, BCc_BTS5 )	38.2353	99.5169	75.922	79.4608	71.3895
KO ( BCc_SHK3Dr, SCc_ANS, SCc_TRPS3, BCc_DHFS, SCc_AOXSr2 )	38.2353	99.5008	75.922	63.8108	66.0877
KO ( BCc_SHK3Dr, SCc_ANS, SCc_TRPS3, BCc_DHFS, SCc_BTS5 )	38.2353	99.5008	75.922	63.8108	100
KO ( BCc_SHK3Dr, SCc_ANS, SCc_TRPS3, BCc_DHFS, BCc_AOXSr2 )	38.2353	99.5005	75.922	63.8108	85.8671
KO ( BCc_SHK3Dr, SCc_ANS, SCc_TRPS3, BCc_DHFS, BCc_BTS5 )	38.2353	99.5004	75.922	63.8108	71.3895
KO ( SCc_SHK3Dr, BCc_ANS, SCc_TRPS3, SCc_DHFS, SCc_AOXSr2 )	38.2353	99.3602	68.0949	93.2524	66.0877
KO ( SCc_SHK3Dr, BCc_ANS, SCc_TRPS3, SCc_DHFS, SCc_BTS5 )	38.2353	99.3602	68.0949	93.2524	100
KO ( SCc_SHK3Dr, BCc_ANS, SCc_TRPS3, SCc_DHFS, BCc_AOXSr2 )	38.2353	99.3599	68.0949	93.2524	85.8671
KO ( SCc_SHK3Dr, BCc_ANS, SCc_TRPS3, SCc_DHFS, BCc_BTS5 )	38.2353	99.3598	68.0949	93.2524	71.3895
KO ( SCc_SHK3Dr, BCc_ANS, SCc_TRPS3, BCc_DHFS, SCc_AOXSr2 )	38.2353	99.3373	68.0949	71.3012	66.0877
KO ( SCc_SHK3Dr, BCc_ANS, SCc_TRPS3, BCc_DHFS, SCc_BTS5 )	38.2353	99.3373	68.0949	71.3012	100
KO ( SCc_SHK3Dr, BCc_ANS, SCc_TRPS3, BCc_DHFS, BCc_AOXSr2 )	38.2353	99.337	68.0949	71.3012	85.8671
KO ( SCc_SHK3Dr, BCc_ANS, SCc_TRPS3, BCc_DHFS, BCc_BTS5 )	38.2353	99.3369	68.0949	71.3012	71.3895
KO ( BCc_SHK3Dr, BCc_ANS, SCc_TRPS3, SCc_DHFS, SCc_AOXSr2 )	38.2353	99.1501	59.6414	79.4608	66.0877
KO ( BCc_SHK3Dr, BCc_ANS, SCc_TRPS3, SCc_DHFS, SCc_BTS5 )	38.2353	99.1501	59.6414	79.4608	100
KO ( BCc_SHK3Dr, BCc_ANS, SCc_TRPS3, SCc_DHFS, BCc_AOXSr2 )	38.2353	99.1498	58.8917	79.4608	85.8671
KO ( BCc_SHK3Dr, BCc_ANS, SCc_TRPS3, SCc_DHFS, BCc_BTS5 )	38.2353	99.1497	58.8917	79.4608	71.3895
KO ( BCc_SHK3Dr, BCc_ANS, SCc_TRPS3, BCc_DHFS, SCc_AOXSr2 )	38.2353	99.1337	59.6414	63.8108	66.0877
KO ( BCc_SHK3Dr, BCc_ANS, SCc_TRPS3, BCc_DHFS, SCc_BTS5 )	38.2353	99.1337	59.6414	63.8108	100
KO ( BCc_SHK3Dr, BCc_ANS, SCc_TRPS3, BCc_DHFS, BCc_AOXSr2 )	38.2353	99.1334	58.8917	63.8108	85.8671
KO ( BCc_SHK3Dr, BCc_ANS, SCc_TRPS3, BCc_DHFS, BCc_BTS5 )	38.2353	99.1333	58.8917	63.8108	71.3895
KO ( SCc_CHORS, SCc_ANS, SCc_DHFS, SCc_AOXSr2, SCc_BTS5 )	36.7647	99.9992	100	93.2524	54.3739
KO ( SCc_CHORS, SCc_ANS, SCc_DHFS, BCc_AOXSr2, SCc_BTS5 )	36.7647	99.9989	100	93.2524	85.8671
KO ( SCc_CHORS, SCc_ANS, SCc_DHFS, SCc_AOXSr2, BCc_BTS5 )	36.7647	99.9987	100	93.2524	66.0396
KO ( SCc_CHORS, SCc_ANS, SCc_DHFS, BCc_AOXSr2, BCc_BTS5 )	36.7647	99.9985	100	93.2524	58.6592
KO ( BCc_TRPS3, SCc_DHFS, SCc_AOXSr2, SCc_BTS5 )	36.7647	99.9888	99.8041	95.6308	54.3739
KO ( SCc_CHORS, SCc_ANS, BCc_TRPS3, SCc_DHFS, SCc_AOXSr2 )	36.7647	99.9888	99.8041	93.2524	66.0877
KO ( SCc_CHORS, SCc_ANS, BCc_TRPS3, SCc_DHFS, SCc_BTS5 )	36.7647	99.9888	99.8041	93.2524	100
KO ( SCc_CHORS, SCc_ANS, BCc_TRPS3, SCc_DHFS, BCc_AOXSr2 )	36.7647	99.9885	99.8041	93.2524	85.8671
KO ( BCc_TRPS3, SCc_DHFS, BCc_AOXSr2, SCc_BTS5 )	36.7647	99.9885	99.8041	95.6308	85.8671
KO ( BCc_TRPS3, SCc_DHFS, SCc_AOXSr2, BCc_BTS5 )	36.7647	99.9884	99.8041	95.6308	66.0396
KO ( SCc_CHORS, SCc_ANS, BCc_TRPS3, SCc_DHFS, BCc_BTS5 )	36.7647	99.9884	99.8041	93.2524	71.3895
KO ( BCc_TRPS3, SCc_DHFS, BCc_AOXSr2, BCc_BTS5 )	36.7647	99.9882	99.8041	95.6308	58.6592
KO ( BCc_TRPS3, BCc_DHFS, SCc_AOXSr2, SCc_BTS5 )	36.7647	99.9706	99.8041	71.3012	54.3739
KO ( BCc_TRPS3, BCc_DHFS, BCc_AOXSr2, SCc_BTS5 )	36.7647	99.9703	99.8041	71.3012	85.8671
KO ( BCc_TRPS3, BCc_DHFS, SCc_AOXSr2, BCc_BTS5 )	36.7647	99.9701	99.8041	71.3012	64.4003
KO ( BCc_TRPS3, BCc_DHFS, BCc_AOXSr2, BCc_BTS5 )	36.7647	99.9699	99.8041	71.3012	58.6592
KO ( SCc_CHORS, SCc_ANS, BCc_DHFS, SCc_AOXSr2, SCc_BTS5 )	36.7647	99.9631	100	63.2246	54.3739
KO ( SCc_CHORS, SCc_ANS, BCc_DHFS, BCc_AOXSr2, SCc_BTS5 )	36.7647	99.9628	100	63.2246	85.8671
KO ( SCc_CHORS, SCc_ANS, BCc_DHFS, SCc_AOXSr2, BCc_BTS5 )	36.7647	99.9627	100	63.2246	64.4003
KO ( SCc_CHORS, SCc_ANS, BCc_DHFS, BCc_AOXSr2, BCc_BTS5 )	36.7647	99.9625	100	63.2246	58.6592
KO ( SCc_CHORS, SCc_ANS, BCc_TRPS3, BCc_DHFS, SCc_AOXSr2 )	36.7647	99.9528	99.8041	63.2246	66.0877
KO ( SCc_CHORS, SCc_ANS, BCc_TRPS3, BCc_DHFS, SCc_BTS5 )	36.7647	99.9528	99.8041	63.2246	100
KO ( SCc_CHORS, SCc_ANS, BCc_TRPS3, BCc_DHFS, BCc_AOXSr2 )	36.7647	99.9525	99.8041	63.2246	85.8671
KO ( SCc_CHORS, SCc_ANS, BCc_TRPS3, BCc_DHFS, BCc_BTS5 )	36.7647	99.9523	99.8041	63.2246	71.3895
KO ( SCc_CHORS, SCc_ANS, SCc_TRPS3, SCc_DHFS, SCc_AOXSr2 )	36.7647	99.9143	69.3226	93.2524	66.0877
KO ( SCc_CHORS, SCc_ANS, SCc_TRPS3, SCc_DHFS, SCc_BTS5 )	36.7647	99.9143	69.3226	93.2524	100
KO ( SCc_TRPS3, SCc_DHFS, SCc_AOXSr2, SCc_BTS5 )	36.7647	99.9143	80.2992	95.6308	54.3739
KO ( SCc_TRPS3, SCc_DHFS, BCc_AOXSr2, SCc_BTS5 )	36.7647	99.914	80.2992	95.6308	85.8671
KO ( SCc_CHORS, SCc_ANS, SCc_TRPS3, SCc_DHFS, BCc_AOXSr2 )	36.7647	99.914	69.3226	93.2524	85.8671
KO ( SCc_CHORS, SCc_ANS, SCc_TRPS3, SCc_DHFS, BCc_BTS5 )	36.7647	99.9139	69.3226	93.2524	71.3895
KO ( SCc_TRPS3, SCc_DHFS, SCc_AOXSr2, BCc_BTS5 )	36.7647	99.9139	80.2992	95.6308	66.0396
KO ( SCc_TRPS3, SCc_DHFS, BCc_AOXSr2, BCc_BTS5 )	36.7647	99.9136	80.2992	95.6308	58.6592
KO ( SCc_TRPS3, BCc_DHFS, SCc_AOXSr2, SCc_BTS5 )	36.7647	99.896	80.2992	71.3012	54.3739
KO ( SCc_TRPS3, BCc_DHFS, BCc_AOXSr2, SCc_BTS5 )	36.7647	99.8958	80.2992	71.3012	85.8671
KO ( SCc_TRPS3, BCc_DHFS, SCc_AOXSr2, BCc_BTS5 )	36.7647	99.8956	80.2992	71.3012	64.4003
KO ( SCc_TRPS3, BCc_DHFS, BCc_AOXSr2, BCc_BTS5 )	36.7647	99.8954	80.2992	71.3012	58.6592
KO ( SCc_CHORS, SCc_ANS, SCc_TRPS3, BCc_DHFS, SCc_AOXSr2 )	36.7647	99.8783	69.3226	63.2246	66.0877
KO ( SCc_CHORS, SCc_ANS, SCc_TRPS3, BCc_DHFS, SCc_BTS5 )	36.7647	99.8783	69.3226	63.2246	100
KO ( SCc_CHORS, SCc_ANS, SCc_TRPS3, BCc_DHFS, BCc_AOXSr2 )	36.7647	99.878	69.3226	63.2246	85.8671
KO ( SCc_CHORS, SCc_ANS, SCc_TRPS3, BCc_DHFS, BCc_BTS5 )	36.7647	99.8779	69.3226	63.2246	71.3895
KO ( BCc_CHORS, BCc_ANS, SCc_DHFS, SCc_AOXSr2, SCc_BTS5 )	36.7647	99.6044	75.9926	86.2162	54.3739
KO ( BCc_CHORS, BCc_ANS, BCc_TRPS3, SCc_DHFS, SCc_AOXSr2 )	36.7647	99.6044	75.7557	86.2162	66.0877
KO ( BCc_CHORS, BCc_ANS, BCc_TRPS3, SCc_DHFS, SCc_BTS5 )	36.7647	99.6044	75.7557	86.2162	100
KO ( BCc_CHORS, BCc_ANS, BCc_TRPS3, SCc_DHFS, BCc_AOXSr2 )	36.7647	99.6041	75.7557	86.2162	85.8671
KO ( BCc_CHORS, BCc_ANS, SCc_DHFS, BCc_AOXSr2, SCc_BTS5 )	36.7647	99.6041	75.9926	86.2162	85.8671
KO ( BCc_CHORS, BCc_ANS, BCc_TRPS3, SCc_DHFS, BCc_BTS5 )	36.7647	99.6039	75.7557	86.2162	71.3895
KO ( BCc_CHORS, BCc_ANS, SCc_DHFS, SCc_AOXSr2, BCc_BTS5 )	36.7647	99.6039	75.9926	86.2162	64.5949
KO ( BCc_CHORS, BCc_ANS, SCc_DHFS, BCc_AOXSr2, BCc_BTS5 )	36.7647	99.6037	75.9926	86.2162	58.6592
KO ( BCc_CHORS, SCc_ANS, SCc_DHFS, SCc_AOXSr2, SCc_BTS5 )	36.7647	99.6015	82.9894	86.2162	54.3739
KO ( BCc_CHORS, SCc_ANS, SCc_DHFS, BCc_AOXSr2, SCc_BTS5 )	36.7647	99.6012	82.9894	86.2162	85.8671
KO ( BCc_CHORS, SCc_ANS, SCc_DHFS, SCc_AOXSr2, BCc_BTS5 )	36.7647	99.6011	82.9894	86.2162	64.5949
KO ( BCc_CHORS, SCc_ANS, SCc_DHFS, BCc_AOXSr2, BCc_BTS5 )	36.7647	99.6009	82.9894	86.2162	58.6592
KO ( BCc_CHORS, SCc_ANS, BCc_TRPS3, SCc_DHFS, SCc_AOXSr2 )	36.7647	99.5913	75.2806	86.2162	66.0877
KO ( BCc_CHORS, SCc_ANS, BCc_TRPS3, SCc_DHFS, SCc_BTS5 )	36.7647	99.5913	75.2806	86.2162	100
KO ( BCc_CHORS, SCc_ANS, BCc_TRPS3, SCc_DHFS, BCc_AOXSr2 )	36.7647	99.591	75.2806	86.2162	85.8671
KO ( BCc_CHORS, SCc_ANS, BCc_TRPS3, SCc_DHFS, BCc_BTS5 )	36.7647	99.5908	75.2806	86.2162	71.3895
KO ( BCc_CHORS, BCc_ANS, BCc_TRPS3, BCc_DHFS, SCc_AOXSr2 )	36.7647	99.5878	75.7557	71.3012	66.0877
KO ( BCc_CHORS, BCc_ANS, BCc_TRPS3, BCc_DHFS, SCc_BTS5 )	36.7647	99.5878	75.7557	71.3012	100
KO ( BCc_CHORS, BCc_ANS, BCc_DHFS, SCc_AOXSr2, SCc_BTS5 )	36.7647	99.5878	75.9926	71.3012	54.3739
KO ( BCc_CHORS, BCc_ANS, BCc_DHFS, BCc_AOXSr2, SCc_BTS5 )	36.7647	99.5875	75.9926	71.3012	85.8671
KO ( BCc_CHORS, BCc_ANS, BCc_TRPS3, BCc_DHFS, BCc_AOXSr2 )	36.7647	99.5875	75.7557	71.3012	85.8671
KO ( BCc_CHORS, BCc_ANS, BCc_TRPS3, BCc_DHFS, BCc_BTS5 )	36.7647	99.5874	75.7557	71.3012	71.3895
KO ( BCc_CHORS, BCc_ANS, BCc_DHFS, SCc_AOXSr2, BCc_BTS5 )	36.7647	99.5874	75.9926	71.3012	64.4003
KO ( BCc_CHORS, BCc_ANS, BCc_DHFS, BCc_AOXSr2, BCc_BTS5 )	36.7647	99.5872	75.9926	71.3012	58.6592
KO ( BCc_CHORS, SCc_ANS, BCc_DHFS, SCc_AOXSr2, SCc_BTS5 )	36.7647	99.585	82.9894	71.3012	54.3739
KO ( BCc_CHORS, SCc_ANS, BCc_DHFS, BCc_AOXSr2, SCc_BTS5 )	36.7647	99.5847	82.9894	71.3012	85.8671
KO ( BCc_CHORS, SCc_ANS, BCc_DHFS, SCc_AOXSr2, BCc_BTS5 )	36.7647	99.5846	82.9894	71.3012	64.4003
KO ( BCc_CHORS, SCc_ANS, BCc_DHFS, BCc_AOXSr2, BCc_BTS5 )	36.7647	99.5843	82.9894	71.3012	58.6592
KO ( BCc_CHORS, SCc_ANS, BCc_TRPS3, BCc_DHFS, SCc_AOXSr2 )	36.7647	99.5747	75.2806	71.3012	66.0877
KO ( BCc_CHORS, SCc_ANS, BCc_TRPS3, BCc_DHFS, SCc_BTS5 )	36.7647	99.5747	75.2806	71.3012	100
KO ( BCc_CHORS, SCc_ANS, BCc_TRPS3, BCc_DHFS, BCc_AOXSr2 )	36.7647	99.5744	75.2806	71.3012	85.8671
KO ( BCc_CHORS, SCc_ANS, BCc_TRPS3, BCc_DHFS, BCc_BTS5 )	36.7647	99.5743	75.2806	71.3012	71.3895
KO ( BCc_CHORS, SCc_ANS, SCc_TRPS3, SCc_DHFS, SCc_AOXSr2 )	36.7647	99.5173	77.8564	86.2162	66.0877
KO ( BCc_CHORS, SCc_ANS, SCc_TRPS3, SCc_DHFS, SCc_BTS5 )	36.7647	99.5173	77.8564	86.2162	100
KO ( BCc_CHORS, SCc_ANS, SCc_TRPS3, SCc_DHFS, BCc_AOXSr2 )	36.7647	99.517	77.8564	86.2162	85.8671
KO ( BCc_CHORS, SCc_ANS, SCc_TRPS3, SCc_DHFS, BCc_BTS5 )	36.7647	99.5169	77.8564	86.2162	71.3895
KO ( BCc_CHORS, SCc_ANS, SCc_TRPS3, BCc_DHFS, SCc_AOXSr2 )	36.7647	99.5008	77.8564	71.3012	66.0877
KO ( BCc_CHORS, SCc_ANS, SCc_TRPS3, BCc_DHFS, SCc_BTS5 )	36.7647	99.5008	77.8564	71.3012	100
KO ( BCc_CHORS, SCc_ANS, SCc_TRPS3, BCc_DHFS, BCc_AOXSr2 )	36.7647	99.5005	77.8564	71.3012	85.8671
KO ( BCc_CHORS, SCc_ANS, SCc_TRPS3, BCc_DHFS, BCc_BTS5 )	36.7647	99.5004	77.8564	71.3012	71.3895
KO ( SCc_CHORS, BCc_ANS, BCc_TRPS3, SCc_DHFS, SCc_AOXSr2 )	36.7647	99.4545	68.443	93.2524	66.0877
KO ( SCc_CHORS, BCc_ANS, BCc_TRPS3, SCc_DHFS, SCc_BTS5 )	36.7647	99.4545	68.443	93.2524	100
KO ( SCc_CHORS, BCc_ANS, SCc_DHFS, SCc_AOXSr2, SCc_BTS5 )	36.7647	99.4545	68.443	93.2524	54.3739
KO ( SCc_CHORS, BCc_ANS, BCc_TRPS3, SCc_DHFS, BCc_AOXSr2 )	36.7647	99.4542	68.443	93.2524	85.8671
KO ( SCc_CHORS, BCc_ANS, SCc_DHFS, BCc_AOXSr2, SCc_BTS5 )	36.7647	99.4542	68.443	93.2524	85.8671
KO ( SCc_CHORS, BCc_ANS, BCc_TRPS3, SCc_DHFS, BCc_BTS5 )	36.7647	99.4541	68.443	93.2524	71.3895
KO ( SCc_CHORS, BCc_ANS, SCc_DHFS, SCc_AOXSr2, BCc_BTS5 )	36.7647	99.4541	68.443	93.2524	66.0396
KO ( SCc_CHORS, BCc_ANS, SCc_DHFS, BCc_AOXSr2, BCc_BTS5 )	36.7647	99.4539	68.443	93.2524	58.6592
KO ( SCc_CHORS, BCc_ANS, BCc_DHFS, SCc_AOXSr2, SCc_BTS5 )	36.7647	99.4189	68.443	63.2246	54.3739
KO ( SCc_CHORS, BCc_ANS, BCc_TRPS3, BCc_DHFS, SCc_AOXSr2 )	36.7647	99.4189	68.443	63.2246	66.0877
KO ( SCc_CHORS, BCc_ANS, BCc_TRPS3, BCc_DHFS, SCc_BTS5 )	36.7647	99.4189	68.443	63.2246	100
KO ( SCc_CHORS, BCc_ANS, BCc_TRPS3, BCc_DHFS, BCc_AOXSr2 )	36.7647	99.4186	68.443	63.2246	85.8671
KO ( SCc_CHORS, BCc_ANS, BCc_DHFS, BCc_AOXSr2, SCc_BTS5 )	36.7647	99.4186	68.443	63.2246	85.8671
KO ( SCc_CHORS, BCc_ANS, BCc_DHFS, SCc_AOXSr2, BCc_BTS5 )	36.7647	99.4184	68.443	63.2246	64.4003
KO ( SCc_CHORS, BCc_ANS, BCc_TRPS3, BCc_DHFS, BCc_BTS5 )	36.7647	99.4184	68.443	63.2246	71.3895
KO ( SCc_CHORS, BCc_ANS, BCc_DHFS, BCc_AOXSr2, BCc_BTS5 )	36.7647	99.4182	68.443	63.2246	58.6592
KO ( BCc_CHORS, BCc_ANS, SCc_TRPS3, SCc_DHFS, SCc_AOXSr2 )	36.7647	99.1501	69.0952	86.2162	66.0877
KO ( BCc_CHORS, BCc_ANS, SCc_TRPS3, SCc_DHFS, SCc_BTS5 )	36.7647	99.1501	69.0952	86.2162	100
KO ( BCc_CHORS, BCc_ANS, SCc_TRPS3, SCc_DHFS, BCc_AOXSr2 )	36.7647	99.1498	69.0952	86.2162	85.8671
KO ( BCc_CHORS, BCc_ANS, SCc_TRPS3, SCc_DHFS, BCc_BTS5 )	36.7647	99.1497	69.0952	86.2162	71.3895
KO ( BCc_CHORS, BCc_ANS, SCc_TRPS3, BCc_DHFS, SCc_AOXSr2 )	36.7647	99.1337	69.0952	71.3012	66.0877
KO ( BCc_CHORS, BCc_ANS, SCc_TRPS3, BCc_DHFS, SCc_BTS5 )	36.7647	99.1337	69.0952	71.3012	100
KO ( BCc_CHORS, BCc_ANS, SCc_TRPS3, BCc_DHFS, BCc_AOXSr2 )	36.7647	99.1334	69.0952	71.3012	85.8671
KO ( BCc_CHORS, BCc_ANS, SCc_TRPS3, BCc_DHFS, BCc_BTS5 )	36.7647	99.1333	69.0952	71.3012	71.3895
KO ( SCc_CHORS, BCc_ANS, SCc_TRPS3, SCc_DHFS, SCc_AOXSr2 )	36.7647	99.0017	55.5082	93.2524	66.0877
KO ( SCc_CHORS, BCc_ANS, SCc_TRPS3, SCc_DHFS, SCc_BTS5 )	36.7647	99.0017	55.5082	93.2524	100
KO ( SCc_CHORS, BCc_ANS, SCc_TRPS3, SCc_DHFS, BCc_AOXSr2 )	36.7647	99.0014	55.5082	93.2524	85.8671
KO ( SCc_CHORS, BCc_ANS, SCc_TRPS3, SCc_DHFS, BCc_BTS5 )	36.7647	99.0012	55.5082	93.2524	71.3895
KO ( SCc_CHORS, BCc_ANS, SCc_TRPS3, BCc_DHFS, SCc_AOXSr2 )	36.7647	98.9663	55.5082	63.2246	66.0877
KO ( SCc_CHORS, BCc_ANS, SCc_TRPS3, BCc_DHFS, SCc_BTS5 )	36.7647	98.9663	55.5082	63.2246	100
KO ( SCc_CHORS, BCc_ANS, SCc_TRPS3, BCc_DHFS, BCc_AOXSr2 )	36.7647	98.966	55.5082	63.2246	85.8671
KO ( SCc_CHORS, BCc_ANS, SCc_TRPS3, BCc_DHFS, BCc_BTS5 )	36.7647	98.9659	55.5082	63.2246	71.3895
KO ( SCc_SHK3Dr, SCc_CHORS, SCc_ANS, SCc_DHFS, SCc_AOXSr2 )	35.2941	99.9992	100	93.2524	66.0877
KO ( SCc_SHK3Dr, SCc_CHORS, SCc_ANS, SCc_DHFS, SCc_BTS5 )	35.2941	99.9992	100	93.2524	100
KO ( SCc_SHK3Dr, SCc_DHFS, SCc_AOXSr2, SCc_BTS5 )	35.2941	99.9992	100	93.2524	54.3739
KO ( SCc_SHK3Dr, SCc_CHORS, SCc_ANS, SCc_DHFS, BCc_AOXSr2 )	35.2941	99.9989	100	93.2524	85.8671
KO ( SCc_SHK3Dr, SCc_DHFS, BCc_AOXSr2, SCc_BTS5 )	35.2941	99.9989	100	93.2524	85.8671
KO ( SCc_SHK3Dr, SCc_DHFS, SCc_AOXSr2, BCc_BTS5 )	35.2941	99.9987	100	93.2524	66.0396
KO ( SCc_SHK3Dr, SCc_CHORS, SCc_ANS, SCc_DHFS, BCc_BTS5 )	35.2941	99.9987	100	93.2524	71.3895
KO ( SCc_SHK3Dr, SCc_DHFS, BCc_AOXSr2, BCc_BTS5 )	35.2941	99.9985	100	93.2524	58.6592
KO ( SCc_SHK3Dr, BCc_TRPS3, SCc_DHFS, SCc_AOXSr2 )	35.2941	99.9888	99.8041	93.2524	66.0877
KO ( SCc_SHK3Dr, BCc_TRPS3, SCc_DHFS, SCc_BTS5 )	35.2941	99.9888	99.8041	93.2524	100
KO ( SCc_SHK3Dr, SCc_CHORS, SCc_ANS, BCc_TRPS3, SCc_AOXSr2, SCc_BTS5 )	35.2941	99.9888	99.8041	93.2524	54.3739
KO ( SCc_SHK3Dr, SCc_CHORS, SCc_ANS, BCc_TRPS3, SCc_DHFS )	35.2941	99.9888	99.8041	93.2524	100
KO ( SCc_SHK3Dr, BCc_TRPS3, SCc_DHFS, BCc_AOXSr2 )	35.2941	99.9885	99.8041	93.2524	85.8671
KO ( SCc_SHK3Dr, SCc_CHORS, SCc_ANS, BCc_TRPS3, BCc_AOXSr2, SCc_BTS5 )	35.2941	99.9885	99.8041	93.2524	85.8671
KO ( SCc_SHK3Dr, BCc_TRPS3, SCc_DHFS, BCc_BTS5 )	35.2941	99.9884	99.8041	93.2524	71.3895
KO ( SCc_SHK3Dr, SCc_CHORS, SCc_ANS, BCc_TRPS3, SCc_AOXSr2, BCc_BTS5 )	35.2941	99.9884	99.8041	93.2524	66.0396
KO ( SCc_SHK3Dr, SCc_CHORS, SCc_ANS, BCc_TRPS3, BCc_AOXSr2, BCc_BTS5 )	35.2941	99.9882	99.8041	93.2524	58.6592
KO ( SCc_SHK3Dr, BCc_DHFS, SCc_AOXSr2, SCc_BTS5 )	35.2941	99.9759	100	71.3012	54.3739
KO ( SCc_SHK3Dr, BCc_DHFS, BCc_AOXSr2, SCc_BTS5 )	35.2941	99.9757	100	71.3012	85.8671
KO ( SCc_SHK3Dr, BCc_DHFS, SCc_AOXSr2, BCc_BTS5 )	35.2941	99.9755	100	71.3012	64.4003
KO ( SCc_SHK3Dr, BCc_DHFS, BCc_AOXSr2, BCc_BTS5 )	35.2941	99.9753	100	71.3012	58.6592
KO ( SCc_SHK3Dr, BCc_TRPS3, BCc_DHFS, SCc_AOXSr2 )	35.2941	99.9656	99.8041	71.3012	66.0877
KO ( SCc_SHK3Dr, BCc_TRPS3, BCc_DHFS, SCc_BTS5 )	35.2941	99.9656	99.8041	71.3012	100
KO ( SCc_SHK3Dr, BCc_TRPS3, BCc_DHFS, BCc_AOXSr2 )	35.2941	99.9653	99.8041	71.3012	85.8671
KO ( SCc_SHK3Dr, BCc_TRPS3, BCc_DHFS, BCc_BTS5 )	35.2941	99.9652	99.8041	71.3012	71.3895
KO ( SCc_SHK3Dr, SCc_CHORS, SCc_ANS, BCc_DHFS, SCc_AOXSr2 )	35.2941	99.9631	100	63.2246	66.0877
KO ( SCc_SHK3Dr, SCc_CHORS, SCc_ANS, BCc_DHFS, SCc_BTS5 )	35.2941	99.9631	100	63.2246	100
KO ( SCc_SHK3Dr, SCc_CHORS, SCc_ANS, BCc_DHFS, BCc_AOXSr2 )	35.2941	99.9628	100	63.2246	85.8671
KO ( SCc_SHK3Dr, SCc_CHORS, SCc_ANS, BCc_DHFS, BCc_BTS5 )	35.2941	99.9627	100	63.2246	71.3895
KO ( SCc_SHK3Dr, SCc_CHORS, SCc_ANS, BCc_TRPS3, BCc_DHFS )	35.2941	99.9528	99.8041	63.2246	100
KO ( SCc_SHK3Dr, SCc_CHORS, SCc_ANS, SCc_TRPS3, SCc_AOXSr2, SCc_BTS5 )	35.2941	99.9143	64.666	93.2524	54.3739
KO ( SCc_SHK3Dr, SCc_TRPS3, SCc_DHFS, SCc_AOXSr2 )	35.2941	99.9143	71.51	93.2524	66.0877
KO ( SCc_SHK3Dr, SCc_TRPS3, SCc_DHFS, SCc_BTS5 )	35.2941	99.9143	71.51	93.2524	100
KO ( SCc_SHK3Dr, SCc_CHORS, SCc_ANS, SCc_TRPS3, SCc_DHFS )	35.2941	99.9143	64.666	93.2524	100
KO ( SCc_SHK3Dr, SCc_TRPS3, SCc_DHFS, BCc_AOXSr2 )	35.2941	99.914	71.51	93.2524	85.8671
KO ( SCc_SHK3Dr, SCc_CHORS, SCc_ANS, SCc_TRPS3, BCc_AOXSr2, SCc_BTS5 )	35.2941	99.914	64.666	93.2524	85.8671
KO ( SCc_SHK3Dr, SCc_CHORS, SCc_ANS, SCc_TRPS3, SCc_AOXSr2, BCc_BTS5 )	35.2941	99.9139	64.666	93.2524	66.0396
KO ( SCc_SHK3Dr, SCc_TRPS3, SCc_DHFS, BCc_BTS5 )	35.2941	99.9139	71.51	93.2524	71.3895
KO ( SCc_SHK3Dr, SCc_CHORS, SCc_ANS, SCc_TRPS3, BCc_AOXSr2, BCc_BTS5 )	35.2941	99.9136	64.666	93.2524	58.6592
KO ( SCc_SHK3Dr, SCc_TRPS3, BCc_DHFS, SCc_AOXSr2 )	35.2941	99.8911	71.51	71.3012	66.0877
KO ( SCc_SHK3Dr, SCc_TRPS3, BCc_DHFS, SCc_BTS5 )	35.2941	99.8911	71.51	71.3012	100
KO ( SCc_SHK3Dr, SCc_TRPS3, BCc_DHFS, BCc_AOXSr2 )	35.2941	99.8908	71.51	71.3012	85.8671
KO ( SCc_SHK3Dr, SCc_TRPS3, BCc_DHFS, BCc_BTS5 )	35.2941	99.8907	71.51	71.3012	71.3895
KO ( SCc_SHK3Dr, SCc_CHORS, SCc_ANS, SCc_TRPS3, BCc_DHFS )	35.2941	99.8783	64.666	63.2246	100
KO ( BCc_SHK3Dr, BCc_CHORS, BCc_ANS, BCc_TRPS3, SCc_AOXSr2, SCc_BTS5 )	35.2941	99.6053	64.421	73.149	54.3739
KO ( BCc_SHK3Dr, BCc_CHORS, BCc_ANS, BCc_TRPS3, BCc_AOXSr2, SCc_BTS5 )	35.2941	99.605	64.421	73.149	85.8671
KO ( BCc_SHK3Dr, BCc_CHORS, BCc_ANS, BCc_TRPS3, SCc_AOXSr2, BCc_BTS5 )	35.2941	99.6048	64.421	73.149	64.5949
KO ( BCc_SHK3Dr, BCc_CHORS, BCc_ANS, BCc_TRPS3, BCc_AOXSr2, BCc_BTS5 )	35.2941	99.6046	64.421	73.149	58.6592
KO ( BCc_SHK3Dr, BCc_CHORS, BCc_ANS, SCc_DHFS, SCc_AOXSr2 )	35.2941	99.6044	64.421	73.149	66.0877
KO ( BCc_SHK3Dr, BCc_CHORS, BCc_ANS, SCc_DHFS, SCc_BTS5 )	35.2941	99.6044	64.421	73.149	100
KO ( BCc_SHK3Dr, BCc_CHORS, BCc_ANS, BCc_TRPS3, SCc_DHFS )	35.2941	99.6044	64.421	73.149	100
KO ( BCc_SHK3Dr, BCc_TRPS3, SCc_DHFS, SCc_AOXSr2 )	35.2941	99.6044	65.7951	79.4608	66.0877
KO ( BCc_SHK3Dr, BCc_TRPS3, SCc_DHFS, SCc_BTS5 )	35.2941	99.6044	65.7951	79.4608	100
KO ( BCc_SHK3Dr, SCc_DHFS, SCc_AOXSr2, SCc_BTS5 )	35.2941	99.6044	75.922	79.4608	54.3739
KO ( BCc_SHK3Dr, BCc_CHORS, BCc_ANS, SCc_DHFS, BCc_AOXSr2 )	35.2941	99.6041	64.421	73.149	85.8671
KO ( BCc_SHK3Dr, BCc_TRPS3, SCc_DHFS, BCc_AOXSr2 )	35.2941	99.6041	65.7951	79.4608	85.8671
KO ( BCc_SHK3Dr, SCc_DHFS, BCc_AOXSr2, SCc_BTS5 )	35.2941	99.6041	75.922	79.4608	85.8671
KO ( BCc_SHK3Dr, BCc_CHORS, BCc_ANS, SCc_DHFS, BCc_BTS5 )	35.2941	99.6039	64.421	73.149	71.3895
KO ( BCc_SHK3Dr, SCc_DHFS, SCc_AOXSr2, BCc_BTS5 )	35.2941	99.6039	75.922	79.4608	65.4447
KO ( BCc_SHK3Dr, BCc_TRPS3, SCc_DHFS, BCc_BTS5 )	35.2941	99.6039	65.7951	79.4608	71.3895
KO ( BCc_SHK3Dr, SCc_DHFS, BCc_AOXSr2, BCc_BTS5 )	35.2941	99.6037	75.922	79.4608	58.6592
KO ( BCc_SHK3Dr, BCc_CHORS, SCc_ANS, SCc_DHFS, SCc_AOXSr2 )	35.2941	99.6015	75.163	73.149	66.0877
KO ( BCc_SHK3Dr, BCc_CHORS, SCc_ANS, SCc_DHFS, SCc_BTS5 )	35.2941	99.6015	75.163	73.149	100
KO ( BCc_SHK3Dr, BCc_CHORS, SCc_ANS, SCc_DHFS, BCc_AOXSr2 )	35.2941	99.6012	75.163	73.149	85.8671
KO ( BCc_SHK3Dr, BCc_CHORS, SCc_ANS, SCc_DHFS, BCc_BTS5 )	35.2941	99.6011	75.163	73.149	71.3895
KO ( BCc_SHK3Dr, BCc_CHORS, SCc_ANS, BCc_TRPS3, SCc_AOXSr2, SCc_BTS5 )	35.2941	99.5922	60.7398	73.149	54.3739
KO ( BCc_SHK3Dr, BCc_CHORS, SCc_ANS, BCc_TRPS3, BCc_AOXSr2, SCc_BTS5 )	35.2941	99.5919	60.7398	73.149	85.8671
KO ( BCc_SHK3Dr, BCc_CHORS, SCc_ANS, BCc_TRPS3, SCc_AOXSr2, BCc_BTS5 )	35.2941	99.5917	60.7398	73.149	64.5949
KO ( BCc_SHK3Dr, BCc_CHORS, SCc_ANS, BCc_TRPS3, BCc_AOXSr2, BCc_BTS5 )	35.2941	99.5915	60.7398	73.149	58.6592
KO ( BCc_SHK3Dr, BCc_CHORS, SCc_ANS, BCc_TRPS3, SCc_DHFS )	35.2941	99.5913	60.7398	73.149	100
KO ( BCc_SHK3Dr, BCc_TRPS3, BCc_DHFS, SCc_AOXSr2 )	35.2941	99.5878	65.7951	63.8108	66.0877
KO ( BCc_SHK3Dr, BCc_TRPS3, BCc_DHFS, SCc_BTS5 )	35.2941	99.5878	65.7951	63.8108	100
KO ( BCc_SHK3Dr, BCc_CHORS, BCc_ANS, BCc_DHFS, SCc_AOXSr2 )	35.2941	99.5878	64.421	63.8108	66.0877
KO ( BCc_SHK3Dr, BCc_CHORS, BCc_ANS, BCc_DHFS, SCc_BTS5 )	35.2941	99.5878	64.421	63.8108	100
KO ( BCc_SHK3Dr, BCc_CHORS, BCc_ANS, BCc_TRPS3, BCc_DHFS )	35.2941	99.5878	64.421	63.8108	100
KO ( BCc_SHK3Dr, BCc_DHFS, SCc_AOXSr2, SCc_BTS5 )	35.2941	99.5878	75.922	63.8108	54.3739
KO ( BCc_SHK3Dr, BCc_CHORS, BCc_ANS, BCc_DHFS, BCc_AOXSr2 )	35.2941	99.5875	64.421	63.8108	85.8671
KO ( BCc_SHK3Dr, BCc_DHFS, BCc_AOXSr2, SCc_BTS5 )	35.2941	99.5875	75.922	63.8108	85.8671
KO ( BCc_SHK3Dr, BCc_TRPS3, BCc_DHFS, BCc_AOXSr2 )	35.2941	99.5875	65.7951	63.8108	85.8671
KO ( BCc_SHK3Dr, BCc_DHFS, SCc_AOXSr2, BCc_BTS5 )	35.2941	99.5874	75.922	63.8108	64.4003
KO ( BCc_SHK3Dr, BCc_TRPS3, BCc_DHFS, BCc_BTS5 )	35.2941	99.5874	65.7951	63.8108	71.3895
KO ( BCc_SHK3Dr, BCc_CHORS, BCc_ANS, BCc_DHFS, BCc_BTS5 )	35.2941	99.5874	64.421	63.8108	71.3895
KO ( BCc_SHK3Dr, BCc_DHFS, BCc_AOXSr2, BCc_BTS5 )	35.2941	99.5872	75.922	63.8108	58.6592
KO ( BCc_SHK3Dr, BCc_CHORS, SCc_ANS, BCc_DHFS, SCc_AOXSr2 )	35.2941	99.585	75.163	63.8108	66.0877
KO ( BCc_SHK3Dr, BCc_CHORS, SCc_ANS, BCc_DHFS, SCc_BTS5 )	35.2941	99.585	75.163	63.8108	100
KO ( BCc_SHK3Dr, BCc_CHORS, SCc_ANS, BCc_DHFS, BCc_AOXSr2 )	35.2941	99.5847	75.163	63.8108	85.8671
KO ( BCc_SHK3Dr, BCc_CHORS, SCc_ANS, BCc_DHFS, BCc_BTS5 )	35.2941	99.5846	75.163	63.8108	71.3895
KO ( BCc_SHK3Dr, BCc_CHORS, SCc_ANS, BCc_TRPS3, BCc_DHFS )	35.2941	99.5747	60.7398	63.8108	100
KO ( BCc_SHK3Dr, BCc_CHORS, SCc_ANS, SCc_TRPS3, SCc_AOXSr2, SCc_BTS5 )	35.2941	99.5182	75.163	73.149	54.3739
KO ( BCc_SHK3Dr, BCc_CHORS, SCc_ANS, SCc_TRPS3, BCc_AOXSr2, SCc_BTS5 )	35.2941	99.5179	75.163	73.149	85.8671
KO ( BCc_SHK3Dr, BCc_CHORS, SCc_ANS, SCc_TRPS3, SCc_AOXSr2, BCc_BTS5 )	35.2941	99.5178	75.163	73.149	64.5949
KO ( BCc_SHK3Dr, BCc_CHORS, SCc_ANS, SCc_TRPS3, BCc_AOXSr2, BCc_BTS5 )	35.2941	99.5176	75.163	73.149	58.6592
KO ( BCc_SHK3Dr, BCc_CHORS, SCc_ANS, SCc_TRPS3, SCc_DHFS )	35.2941	99.5173	75.163	73.149	100
KO ( BCc_SHK3Dr, SCc_TRPS3, SCc_DHFS, SCc_AOXSr2 )	35.2941	99.5173	75.922	79.4608	66.0877
KO ( BCc_SHK3Dr, SCc_TRPS3, SCc_DHFS, SCc_BTS5 )	35.2941	99.5173	75.922	79.4608	100
KO ( BCc_SHK3Dr, SCc_TRPS3, SCc_DHFS, BCc_AOXSr2 )	35.2941	99.517	75.922	79.4608	85.8671
KO ( BCc_SHK3Dr, SCc_TRPS3, SCc_DHFS, BCc_BTS5 )	35.2941	99.5169	75.922	79.4608	71.3895
KO ( BCc_SHK3Dr, BCc_CHORS, SCc_ANS, SCc_TRPS3, BCc_DHFS )	35.2941	99.5008	75.163	63.8108	100
KO ( BCc_SHK3Dr, SCc_TRPS3, BCc_DHFS, SCc_AOXSr2 )	35.2941	99.5008	75.922	63.8108	66.0877
KO ( BCc_SHK3Dr, SCc_TRPS3, BCc_DHFS, SCc_BTS5 )	35.2941	99.5008	75.922	63.8108	100
KO ( BCc_SHK3Dr, SCc_TRPS3, BCc_DHFS, BCc_AOXSr2 )	35.2941	99.5005	75.922	63.8108	85.8671
KO ( BCc_SHK3Dr, SCc_TRPS3, BCc_DHFS, BCc_BTS5 )	35.2941	99.5004	75.922	63.8108	71.3895
KO ( SCc_SHK3Dr, SCc_CHORS, BCc_ANS, SCc_DHFS, SCc_AOXSr2 )	35.2941	99.4545	68.443	93.2524	66.0877
KO ( SCc_SHK3Dr, SCc_CHORS, BCc_ANS, SCc_DHFS, SCc_BTS5 )	35.2941	99.4545	68.443	93.2524	100
KO ( SCc_SHK3Dr, SCc_CHORS, BCc_ANS, BCc_TRPS3, SCc_AOXSr2, SCc_BTS5 )	35.2941	99.4545	68.443	93.2524	54.3739
KO ( SCc_SHK3Dr, SCc_CHORS, BCc_ANS, BCc_TRPS3, SCc_DHFS )	35.2941	99.4545	68.443	93.2524	100
KO ( SCc_SHK3Dr, SCc_CHORS, BCc_ANS, SCc_DHFS, BCc_AOXSr2 )	35.2941	99.4542	68.443	93.2524	85.8671
KO ( SCc_SHK3Dr, SCc_CHORS, BCc_ANS, BCc_TRPS3, BCc_AOXSr2, SCc_BTS5 )	35.2941	99.4542	68.443	93.2524	85.8671
KO ( SCc_SHK3Dr, SCc_CHORS, BCc_ANS, BCc_TRPS3, SCc_AOXSr2, BCc_BTS5 )	35.2941	99.4541	68.443	93.2524	66.0396
KO ( SCc_SHK3Dr, SCc_CHORS, BCc_ANS, SCc_DHFS, BCc_BTS5 )	35.2941	99.4541	68.443	93.2524	71.3895
KO ( SCc_SHK3Dr, SCc_CHORS, BCc_ANS, BCc_TRPS3, BCc_AOXSr2, BCc_BTS5 )	35.2941	99.4539	68.443	93.2524	58.6592
KO ( SCc_SHK3Dr, SCc_CHORS, BCc_ANS, BCc_DHFS, SCc_AOXSr2 )	35.2941	99.4189	68.443	63.2246	66.0877
KO ( SCc_SHK3Dr, SCc_CHORS, BCc_ANS, BCc_DHFS, SCc_BTS5 )	35.2941	99.4189	68.443	63.2246	100
KO ( SCc_SHK3Dr, SCc_CHORS, BCc_ANS, BCc_TRPS3, BCc_DHFS )	35.2941	99.4189	68.443	63.2246	100
KO ( SCc_SHK3Dr, SCc_CHORS, BCc_ANS, BCc_DHFS, BCc_AOXSr2 )	35.2941	99.4186	68.443	63.2246	85.8671
KO ( SCc_SHK3Dr, SCc_CHORS, BCc_ANS, BCc_DHFS, BCc_BTS5 )	35.2941	99.4184	68.443	63.2246	71.3895
KO ( BCc_SHK3Dr, BCc_CHORS, BCc_ANS, SCc_TRPS3, SCc_AOXSr2, SCc_BTS5 )	35.2941	99.151	59.6414	73.149	54.3739
KO ( BCc_SHK3Dr, BCc_CHORS, BCc_ANS, SCc_TRPS3, BCc_AOXSr2, SCc_BTS5 )	35.2941	99.1507	58.8917	73.149	85.8671
KO ( BCc_SHK3Dr, BCc_CHORS, BCc_ANS, SCc_TRPS3, SCc_AOXSr2, BCc_BTS5 )	35.2941	99.1506	58.8917	73.149	64.5949
KO ( BCc_SHK3Dr, BCc_CHORS, BCc_ANS, SCc_TRPS3, BCc_AOXSr2, BCc_BTS5 )	35.2941	99.1504	58.8917	73.149	58.6592
KO ( BCc_SHK3Dr, BCc_CHORS, BCc_ANS, SCc_TRPS3, SCc_DHFS )	35.2941	99.1501	59.6414	73.149	100
KO ( BCc_SHK3Dr, BCc_CHORS, BCc_ANS, SCc_TRPS3, BCc_DHFS )	35.2941	99.1337	59.6414	63.8108	100
KO ( SCc_SHK3Dr, SCc_CHORS, BCc_ANS, SCc_TRPS3, SCc_DHFS )	35.2941	99.0017	55.5082	93.2524	100
KO ( SCc_SHK3Dr, SCc_CHORS, BCc_ANS, SCc_TRPS3, SCc_AOXSr2, SCc_BTS5 )	35.2941	99.0017	55.5082	93.2524	54.3739
KO ( SCc_SHK3Dr, SCc_CHORS, BCc_ANS, SCc_TRPS3, BCc_AOXSr2, SCc_BTS5 )	35.2941	99.0014	55.5082	93.2524	85.8671
KO ( SCc_SHK3Dr, SCc_CHORS, BCc_ANS, SCc_TRPS3, SCc_AOXSr2, BCc_BTS5 )	35.2941	99.0012	55.5082	93.2524	66.0396
KO ( SCc_SHK3Dr, SCc_CHORS, BCc_ANS, SCc_TRPS3, BCc_AOXSr2, BCc_BTS5 )	35.2941	99.001	55.5082	93.2524	58.6592
KO ( SCc_SHK3Dr, SCc_CHORS, BCc_ANS, SCc_TRPS3, BCc_DHFS )	35.2941	98.9663	55.5082	63.2246	100
KO ( SCc_SHK3Dr, BCc_CHORS, BCc_ANS, BCc_TRPS3, SCc_AOXSr2, SCc_BTS5 )	35.2941	98.3732	75.7557	87.7466	54.3739
KO ( SCc_SHK3Dr, BCc_CHORS, BCc_ANS, BCc_TRPS3, BCc_AOXSr2, SCc_BTS5 )	35.2941	98.373	75.7557	87.7466	85.8671
KO ( SCc_SHK3Dr, BCc_CHORS, BCc_ANS, BCc_TRPS3, SCc_AOXSr2, BCc_BTS5 )	35.2941	98.3728	75.7557	87.7466	64.4003
KO ( SCc_SHK3Dr, BCc_CHORS, BCc_ANS, BCc_TRPS3, BCc_AOXSr2, BCc_BTS5 )	35.2941	98.3726	75.7557	87.7466	58.6592
KO ( SCc_SHK3Dr, BCc_CHORS, BCc_ANS, BCc_TRPS3, SCc_DHFS )	35.2941	98.3724	75.7557	86.2162	100
KO ( SCc_SHK3Dr, BCc_CHORS, BCc_ANS, SCc_DHFS, SCc_AOXSr2 )	35.2941	98.3724	75.9926	86.2162	66.0877
KO ( SCc_SHK3Dr, BCc_CHORS, BCc_ANS, SCc_DHFS, SCc_BTS5 )	35.2941	98.3724	75.9926	86.2162	100
KO ( SCc_SHK3Dr, BCc_CHORS, BCc_ANS, SCc_DHFS, BCc_AOXSr2 )	35.2941	98.3721	75.9926	86.2162	85.8671
KO ( SCc_SHK3Dr, BCc_CHORS, BCc_ANS, SCc_DHFS, BCc_BTS5 )	35.2941	98.372	75.9926	86.2162	71.3895
KO ( SCc_SHK3Dr, BCc_CHORS, SCc_ANS, SCc_DHFS, SCc_AOXSr2 )	35.2941	98.3696	82.9894	86.2162	66.0877
KO ( SCc_SHK3Dr, BCc_CHORS, SCc_ANS, SCc_DHFS, SCc_BTS5 )	35.2941	98.3696	82.9894	86.2162	100
KO ( SCc_SHK3Dr, BCc_CHORS, SCc_ANS, SCc_DHFS, BCc_AOXSr2 )	35.2941	98.3693	82.9894	86.2162	85.8671
KO ( SCc_SHK3Dr, BCc_CHORS, SCc_ANS, SCc_DHFS, BCc_BTS5 )	35.2941	98.3692	82.9894	86.2162	71.3895
KO ( SCc_SHK3Dr, BCc_CHORS, SCc_ANS, BCc_TRPS3, SCc_AOXSr2, SCc_BTS5 )	35.2941	98.3605	75.2806	87.7466	54.3739
KO ( SCc_SHK3Dr, BCc_CHORS, SCc_ANS, BCc_TRPS3, BCc_AOXSr2, SCc_BTS5 )	35.2941	98.3602	75.2806	87.7466	85.8671
KO ( SCc_SHK3Dr, BCc_CHORS, SCc_ANS, BCc_TRPS3, SCc_AOXSr2, BCc_BTS5 )	35.2941	98.3601	75.2806	87.7466	64.4003
KO ( SCc_SHK3Dr, BCc_CHORS, SCc_ANS, BCc_TRPS3, BCc_AOXSr2, BCc_BTS5 )	35.2941	98.3598	75.2806	87.7466	58.6592
KO ( SCc_SHK3Dr, BCc_CHORS, SCc_ANS, BCc_TRPS3, SCc_DHFS )	35.2941	98.3596	75.2806	86.2162	100
KO ( SCc_SHK3Dr, BCc_CHORS, BCc_ANS, BCc_TRPS3, BCc_DHFS )	35.2941	98.3562	75.7557	71.3012	100
KO ( SCc_SHK3Dr, BCc_CHORS, BCc_ANS, BCc_DHFS, SCc_AOXSr2 )	35.2941	98.3562	75.9926	71.3012	66.0877
KO ( SCc_SHK3Dr, BCc_CHORS, BCc_ANS, BCc_DHFS, SCc_BTS5 )	35.2941	98.3562	75.9926	71.3012	100
KO ( SCc_SHK3Dr, BCc_CHORS, BCc_ANS, BCc_DHFS, BCc_AOXSr2 )	35.2941	98.3559	75.9926	71.3012	85.8671
KO ( SCc_SHK3Dr, BCc_CHORS, BCc_ANS, BCc_DHFS, BCc_BTS5 )	35.2941	98.3558	75.9926	71.3012	71.3895
KO ( SCc_SHK3Dr, BCc_CHORS, SCc_ANS, BCc_DHFS, SCc_AOXSr2 )	35.2941	98.3535	82.9894	71.3012	66.0877
KO ( SCc_SHK3Dr, BCc_CHORS, SCc_ANS, BCc_DHFS, SCc_BTS5 )	35.2941	98.3535	82.9894	71.3012	100
KO ( SCc_SHK3Dr, BCc_CHORS, SCc_ANS, BCc_DHFS, BCc_AOXSr2 )	35.2941	98.3532	82.9894	71.3012	85.8671
KO ( SCc_SHK3Dr, BCc_CHORS, SCc_ANS, BCc_DHFS, BCc_BTS5 )	35.2941	98.353	82.9894	71.3012	71.3895
KO ( SCc_SHK3Dr, BCc_CHORS, SCc_ANS, BCc_TRPS3, BCc_DHFS )	35.2941	98.3434	75.2806	71.3012	100
KO ( SCc_SHK3Dr, BCc_CHORS, SCc_ANS, SCc_TRPS3, SCc_AOXSr2, SCc_BTS5 )	35.2941	98.2883	63.3807	87.7466	54.3739
KO ( SCc_SHK3Dr, BCc_CHORS, SCc_ANS, SCc_TRPS3, BCc_AOXSr2, SCc_BTS5 )	35.2941	98.2881	63.3807	87.7466	85.8671
KO ( SCc_SHK3Dr, BCc_CHORS, SCc_ANS, SCc_TRPS3, SCc_AOXSr2, BCc_BTS5 )	35.2941	98.2879	63.3807	87.7466	64.4003
KO ( SCc_SHK3Dr, BCc_CHORS, SCc_ANS, SCc_TRPS3, BCc_AOXSr2, BCc_BTS5 )	35.2941	98.2877	63.3807	87.7466	58.6592
KO ( SCc_SHK3Dr, BCc_CHORS, SCc_ANS, SCc_TRPS3, SCc_DHFS )	35.2941	98.2875	63.3807	86.2162	100
KO ( SCc_SHK3Dr, BCc_CHORS, SCc_ANS, SCc_TRPS3, BCc_DHFS )	35.2941	98.2713	63.3807	71.3012	100
KO ( SCc_SHK3Dr, BCc_CHORS, BCc_ANS, SCc_TRPS3, SCc_AOXSr2, SCc_BTS5 )	35.2941	97.9301	68.0949	87.7466	54.3739
KO ( SCc_SHK3Dr, BCc_CHORS, BCc_ANS, SCc_TRPS3, BCc_AOXSr2, SCc_BTS5 )	35.2941	97.9299	68.0949	87.7466	85.8671
KO ( SCc_SHK3Dr, BCc_CHORS, BCc_ANS, SCc_TRPS3, SCc_AOXSr2, BCc_BTS5 )	35.2941	97.9297	68.0949	87.7466	64.4003
KO ( SCc_SHK3Dr, BCc_CHORS, BCc_ANS, SCc_TRPS3, BCc_AOXSr2, BCc_BTS5 )	35.2941	97.9295	68.0949	87.7466	58.6592
KO ( SCc_SHK3Dr, BCc_CHORS, BCc_ANS, SCc_TRPS3, SCc_DHFS )	35.2941	97.9293	68.0949	86.2162	100
KO ( SCc_SHK3Dr, BCc_CHORS, BCc_ANS, SCc_TRPS3, BCc_DHFS )	35.2941	97.9133	68.0949	71.3012	100
KO ( BCc_SHK3Dr, SCc_CHORS, SCc_ANS, SCc_DHFS, SCc_AOXSr2 )	35.2941	97.8704	74.7483	79.4608	66.0877
KO ( BCc_SHK3Dr, SCc_CHORS, SCc_ANS, SCc_DHFS, SCc_BTS5 )	35.2941	97.8704	74.7483	79.4608	100
KO ( BCc_SHK3Dr, SCc_CHORS, SCc_ANS, SCc_DHFS, BCc_AOXSr2 )	35.2941	97.8701	74.7483	79.4608	85.8671
KO ( BCc_SHK3Dr, SCc_CHORS, SCc_ANS, SCc_DHFS, BCc_BTS5 )	35.2941	97.87	74.7483	79.4608	71.3895
KO ( BCc_SHK3Dr, SCc_CHORS, SCc_ANS, BCc_TRPS3, SCc_DHFS )	35.2941	97.8605	65.7951	79.4608	100
KO ( BCc_SHK3Dr, SCc_CHORS, SCc_ANS, BCc_TRPS3, SCc_AOXSr2, SCc_BTS5 )	35.2941	97.8605	65.7951	79.4608	54.3739
KO ( BCc_SHK3Dr, SCc_CHORS, SCc_ANS, BCc_TRPS3, BCc_AOXSr2, SCc_BTS5 )	35.2941	97.8602	65.7951	79.4608	85.8671
KO ( BCc_SHK3Dr, SCc_CHORS, SCc_ANS, BCc_TRPS3, SCc_AOXSr2, BCc_BTS5 )	35.2941	97.8601	65.7951	79.4608	65.4447
KO ( BCc_SHK3Dr, SCc_CHORS, SCc_ANS, BCc_TRPS3, BCc_AOXSr2, BCc_BTS5 )	35.2941	97.8599	65.7951	79.4608	58.6592
KO ( BCc_SHK3Dr, SCc_CHORS, SCc_ANS, BCc_DHFS, SCc_AOXSr2 )	35.2941	97.8359	74.7483	53.3624	66.0877
KO ( BCc_SHK3Dr, SCc_CHORS, SCc_ANS, BCc_DHFS, SCc_BTS5 )	35.2941	97.8359	74.7483	53.3624	100
KO ( BCc_SHK3Dr, SCc_CHORS, SCc_ANS, BCc_DHFS, BCc_AOXSr2 )	35.2941	97.8356	74.7483	53.3624	85.8671
KO ( BCc_SHK3Dr, SCc_CHORS, SCc_ANS, BCc_DHFS, BCc_BTS5 )	35.2941	97.8355	74.7483	53.3624	71.3895
KO ( BCc_SHK3Dr, SCc_CHORS, SCc_ANS, BCc_TRPS3, BCc_DHFS )	35.2941	97.826	65.7951	53.3624	100
KO ( BCc_SHK3Dr, SCc_CHORS, SCc_ANS, SCc_TRPS3, SCc_AOXSr2, SCc_BTS5 )	35.2941	97.7891	69.3226	79.4608	54.3739
KO ( BCc_SHK3Dr, SCc_CHORS, SCc_ANS, SCc_TRPS3, SCc_DHFS )	35.2941	97.7891	69.3226	79.4608	100
KO ( BCc_SHK3Dr, SCc_CHORS, SCc_ANS, SCc_TRPS3, BCc_AOXSr2, SCc_BTS5 )	35.2941	97.7888	69.3226	79.4608	85.8671
KO ( BCc_SHK3Dr, SCc_CHORS, SCc_ANS, SCc_TRPS3, SCc_AOXSr2, BCc_BTS5 )	35.2941	97.7887	69.3226	79.4608	65.4447
KO ( BCc_SHK3Dr, SCc_CHORS, SCc_ANS, SCc_TRPS3, BCc_AOXSr2, BCc_BTS5 )	35.2941	97.7885	69.3226	79.4608	58.6592
KO ( BCc_SHK3Dr, SCc_CHORS, SCc_ANS, SCc_TRPS3, BCc_DHFS )	35.2941	97.7546	69.3226	53.3624	100
KO ( BCc_SHK3Dr, SCc_CHORS, BCc_ANS, BCc_TRPS3, SCc_AOXSr2, SCc_BTS5 )	35.2941	97.3486	50.3734	79.4608	54.3739
KO ( BCc_SHK3Dr, SCc_CHORS, BCc_ANS, BCc_TRPS3, SCc_DHFS )	35.2941	97.3486	50.3734	79.4608	100
KO ( BCc_SHK3Dr, SCc_CHORS, BCc_ANS, SCc_DHFS, SCc_AOXSr2 )	35.2941	97.3486	50.3734	79.4608	66.0877
KO ( BCc_SHK3Dr, SCc_CHORS, BCc_ANS, SCc_DHFS, SCc_BTS5 )	35.2941	97.3486	50.3734	79.4608	100
KO ( BCc_SHK3Dr, SCc_CHORS, BCc_ANS, SCc_DHFS, BCc_AOXSr2 )	35.2941	97.3484	50.3734	79.4608	85.8671
KO ( BCc_SHK3Dr, SCc_CHORS, BCc_ANS, BCc_TRPS3, BCc_AOXSr2, SCc_BTS5 )	35.2941	97.3484	50.3734	79.4608	85.8671
KO ( BCc_SHK3Dr, SCc_CHORS, BCc_ANS, BCc_TRPS3, SCc_AOXSr2, BCc_BTS5 )	35.2941	97.3482	50.3734	79.4608	65.4447
KO ( BCc_SHK3Dr, SCc_CHORS, BCc_ANS, SCc_DHFS, BCc_BTS5 )	35.2941	97.3482	50.3734	79.4608	71.3895
KO ( BCc_SHK3Dr, SCc_CHORS, BCc_ANS, BCc_TRPS3, BCc_AOXSr2, BCc_BTS5 )	35.2941	97.348	50.3734	79.4608	58.6592
KO ( BCc_SHK3Dr, SCc_CHORS, BCc_ANS, BCc_DHFS, SCc_AOXSr2 )	35.2941	97.3145	50.3734	53.3624	66.0877
KO ( BCc_SHK3Dr, SCc_CHORS, BCc_ANS, BCc_DHFS, SCc_BTS5 )	35.2941	97.3145	50.3734	53.3624	100
KO ( BCc_SHK3Dr, SCc_CHORS, BCc_ANS, BCc_TRPS3, BCc_DHFS )	35.2941	97.3145	50.3734	53.3624	100
KO ( BCc_SHK3Dr, SCc_CHORS, BCc_ANS, BCc_DHFS, BCc_AOXSr2 )	35.2941	97.3142	50.3734	53.3624	85.8671
KO ( BCc_SHK3Dr, SCc_CHORS, BCc_ANS, BCc_DHFS, BCc_BTS5 )	35.2941	97.3141	50.3734	53.3624	71.3895
KO ( BCc_SHK3Dr, SCc_CHORS, BCc_ANS, SCc_TRPS3, SCc_DHFS )	35.2941	96.9147	47.9038	79.4608	100
KO ( BCc_SHK3Dr, SCc_CHORS, BCc_ANS, SCc_TRPS3, SCc_AOXSr2, SCc_BTS5 )	35.2941	96.9147	47.9038	79.4608	54.3739
KO ( BCc_SHK3Dr, SCc_CHORS, BCc_ANS, SCc_TRPS3, BCc_AOXSr2, SCc_BTS5 )	35.2941	96.9144	47.9038	79.4608	85.8671
KO ( BCc_SHK3Dr, SCc_CHORS, BCc_ANS, SCc_TRPS3, SCc_AOXSr2, BCc_BTS5 )	35.2941	96.9143	47.9038	79.4608	65.4447
KO ( BCc_SHK3Dr, SCc_CHORS, BCc_ANS, SCc_TRPS3, BCc_AOXSr2, BCc_BTS5 )	35.2941	96.9141	47.9038	79.4608	58.6592
KO ( BCc_SHK3Dr, SCc_CHORS, BCc_ANS, SCc_TRPS3, BCc_DHFS )	35.2941	96.8808	47.9038	53.3624	100
KO ( SCc_CHORS, SCc_DHFS, SCc_AOXSr2, SCc_BTS5 )	33.8235	99.9992	100	93.2524	54.3739
KO ( SCc_CHORS, SCc_DHFS, BCc_AOXSr2, SCc_BTS5 )	33.8235	99.9989	100	93.2524	85.8671
KO ( SCc_CHORS, SCc_DHFS, SCc_AOXSr2, BCc_BTS5 )	33.8235	99.9987	100	93.2524	66.0396
KO ( SCc_CHORS, SCc_DHFS, BCc_AOXSr2, BCc_BTS5 )	33.8235	99.9985	100	93.2524	58.6592
KO ( SCc_CHORS, BCc_TRPS3, SCc_DHFS, SCc_AOXSr2 )	33.8235	99.9888	99.8041	93.2524	66.0877
KO ( SCc_CHORS, BCc_TRPS3, SCc_DHFS, SCc_BTS5 )	33.8235	99.9888	99.8041	93.2524	100
KO ( SCc_CHORS, BCc_TRPS3, SCc_DHFS, BCc_AOXSr2 )	33.8235	99.9885	99.8041	93.2524	85.8671
KO ( SCc_CHORS, BCc_TRPS3, SCc_DHFS, BCc_BTS5 )	33.8235	99.9884	99.8041	93.2524	71.3895
KO ( SCc_CHORS, BCc_DHFS, SCc_AOXSr2, SCc_BTS5 )	33.8235	99.9631	100	63.2246	54.3739
KO ( SCc_CHORS, BCc_DHFS, BCc_AOXSr2, SCc_BTS5 )	33.8235	99.9628	100	63.2246	85.8671
KO ( SCc_CHORS, BCc_DHFS, SCc_AOXSr2, BCc_BTS5 )	33.8235	99.9627	100	63.2246	64.4003
KO ( SCc_CHORS, BCc_DHFS, BCc_AOXSr2, BCc_BTS5 )	33.8235	99.9625	100	63.2246	58.6592
KO ( SCc_CHORS, BCc_TRPS3, BCc_DHFS, SCc_AOXSr2 )	33.8235	99.9528	99.8041	63.2246	66.0877
KO ( SCc_CHORS, BCc_TRPS3, BCc_DHFS, SCc_BTS5 )	33.8235	99.9528	99.8041	63.2246	100
KO ( SCc_CHORS, BCc_TRPS3, BCc_DHFS, BCc_AOXSr2 )	33.8235	99.9525	99.8041	63.2246	85.8671
KO ( SCc_CHORS, BCc_TRPS3, BCc_DHFS, BCc_BTS5 )	33.8235	99.9523	99.8041	63.2246	71.3895
KO ( SCc_CHORS, SCc_TRPS3, SCc_DHFS, SCc_AOXSr2 )	33.8235	99.9143	69.3226	93.2524	66.0877
KO ( SCc_CHORS, SCc_TRPS3, SCc_DHFS, SCc_BTS5 )	33.8235	99.9143	69.3226	93.2524	100
KO ( SCc_CHORS, SCc_TRPS3, SCc_DHFS, BCc_AOXSr2 )	33.8235	99.914	69.3226	93.2524	85.8671
KO ( SCc_CHORS, SCc_TRPS3, SCc_DHFS, BCc_BTS5 )	33.8235	99.9139	69.3226	93.2524	71.3895
KO ( SCc_CHORS, SCc_TRPS3, BCc_DHFS, SCc_AOXSr2 )	33.8235	99.8783	69.3226	63.2246	66.0877
KO ( SCc_CHORS, SCc_TRPS3, BCc_DHFS, SCc_BTS5 )	33.8235	99.8783	69.3226	63.2246	100
KO ( SCc_CHORS, SCc_TRPS3, BCc_DHFS, BCc_AOXSr2 )	33.8235	99.878	69.3226	63.2246	85.8671
KO ( SCc_CHORS, SCc_TRPS3, BCc_DHFS, BCc_BTS5 )	33.8235	99.8779	69.3226	63.2246	71.3895
KO ( BCc_CHORS, BCc_TRPS3, SCc_DHFS, SCc_AOXSr2 )	33.8235	99.6044	75.7557	86.2162	66.0877
KO ( BCc_CHORS, BCc_TRPS3, SCc_DHFS, SCc_BTS5 )	33.8235	99.6044	75.7557	86.2162	100
KO ( BCc_CHORS, SCc_DHFS, SCc_AOXSr2, SCc_BTS5 )	33.8235	99.6044	86.3667	86.2162	54.3739
KO ( BCc_CHORS, BCc_TRPS3, SCc_DHFS, BCc_AOXSr2 )	33.8235	99.6041	75.7557	86.2162	85.8671
KO ( BCc_CHORS, SCc_DHFS, BCc_AOXSr2, SCc_BTS5 )	33.8235	99.6041	86.3667	86.2162	85.8671
KO ( BCc_CHORS, BCc_TRPS3, SCc_DHFS, BCc_BTS5 )	33.8235	99.6039	75.7557	86.2162	71.3895
KO ( BCc_CHORS, SCc_DHFS, SCc_AOXSr2, BCc_BTS5 )	33.8235	99.6039	86.3667	86.2162	64.5949
KO ( BCc_CHORS, SCc_DHFS, BCc_AOXSr2, BCc_BTS5 )	33.8235	99.6037	86.3667	86.2162	58.6592
KO ( BCc_CHORS, BCc_TRPS3, BCc_DHFS, SCc_AOXSr2 )	33.8235	99.5878	75.7557	71.3012	66.0877
KO ( BCc_CHORS, BCc_TRPS3, BCc_DHFS, SCc_BTS5 )	33.8235	99.5878	75.7557	71.3012	100
KO ( BCc_CHORS, BCc_DHFS, SCc_AOXSr2, SCc_BTS5 )	33.8235	99.5878	86.3667	71.3012	54.3739
KO ( BCc_CHORS, BCc_DHFS, BCc_AOXSr2, SCc_BTS5 )	33.8235	99.5875	86.3667	71.3012	85.8671
KO ( BCc_CHORS, BCc_TRPS3, BCc_DHFS, BCc_AOXSr2 )	33.8235	99.5875	75.7557	71.3012	85.8671
KO ( BCc_CHORS, BCc_DHFS, SCc_AOXSr2, BCc_BTS5 )	33.8235	99.5874	86.3667	71.3012	64.4003
KO ( BCc_CHORS, BCc_TRPS3, BCc_DHFS, BCc_BTS5 )	33.8235	99.5874	75.7557	71.3012	71.3895
KO ( BCc_CHORS, BCc_DHFS, BCc_AOXSr2, BCc_BTS5 )	33.8235	99.5872	86.3667	71.3012	58.6592
KO ( BCc_CHORS, SCc_TRPS3, SCc_DHFS, SCc_AOXSr2 )	33.8235	99.5173	77.8564	86.2162	66.0877
KO ( BCc_CHORS, SCc_TRPS3, SCc_DHFS, SCc_BTS5 )	33.8235	99.5173	77.8564	86.2162	100
KO ( BCc_CHORS, SCc_TRPS3, SCc_DHFS, BCc_AOXSr2 )	33.8235	99.517	77.8564	86.2162	85.8671
KO ( BCc_CHORS, SCc_TRPS3, SCc_DHFS, BCc_BTS5 )	33.8235	99.5169	77.8564	86.2162	71.3895
KO ( BCc_CHORS, SCc_TRPS3, BCc_DHFS, SCc_AOXSr2 )	33.8235	99.5008	77.8564	71.3012	66.0877
KO ( BCc_CHORS, SCc_TRPS3, BCc_DHFS, SCc_BTS5 )	33.8235	99.5008	77.8564	71.3012	100
KO ( BCc_CHORS, SCc_TRPS3, BCc_DHFS, BCc_AOXSr2 )	33.8235	99.5005	77.8564	71.3012	85.8671
KO ( BCc_CHORS, SCc_TRPS3, BCc_DHFS, BCc_BTS5 )	33.8235	99.5004	77.8564	71.3012	71.3895
KO ( SCc_ANS, SCc_DHFS, SCc_AOXSr2, SCc_BTS5 )	32.3529	99.9992	100	95.6308	54.3739
KO ( SCc_SHK3Dr, SCc_CHORS, SCc_DHFS, SCc_AOXSr2 )	32.3529	99.9992	100	93.2524	66.0877
KO ( SCc_SHK3Dr, SCc_CHORS, SCc_DHFS, SCc_BTS5 )	32.3529	99.9992	100	93.2524	100
KO ( SCc_ANS, SCc_DHFS, BCc_AOXSr2, SCc_BTS5 )	32.3529	99.9989	100	95.6308	85.8671
KO ( SCc_SHK3Dr, SCc_CHORS, SCc_DHFS, BCc_AOXSr2 )	32.3529	99.9989	100	93.2524	85.8671
KO ( SCc_ANS, SCc_DHFS, SCc_AOXSr2, BCc_BTS5 )	32.3529	99.9987	100	95.6308	66.0396
KO ( SCc_SHK3Dr, SCc_CHORS, SCc_DHFS, BCc_BTS5 )	32.3529	99.9987	100	93.2524	71.3895
KO ( SCc_ANS, SCc_DHFS, BCc_AOXSr2, BCc_BTS5 )	32.3529	99.9985	100	95.6308	58.6592
KO ( SCc_ANS, BCc_TRPS3, SCc_DHFS, SCc_AOXSr2 )	32.3529	99.9888	99.8041	95.6308	66.0877
KO ( SCc_ANS, BCc_TRPS3, SCc_DHFS, SCc_BTS5 )	32.3529	99.9888	99.8041	95.6308	100
KO ( SCc_SHK3Dr, SCc_CHORS, BCc_TRPS3, SCc_AOXSr2, SCc_BTS5 )	32.3529	99.9888	99.8041	93.2524	54.3739
KO ( SCc_SHK3Dr, SCc_CHORS, BCc_TRPS3, SCc_DHFS )	32.3529	99.9888	99.8041	93.2524	100
KO ( SCc_ANS, BCc_TRPS3, SCc_DHFS, BCc_AOXSr2 )	32.3529	99.9885	99.8041	95.6308	85.8671
KO ( SCc_SHK3Dr, SCc_CHORS, BCc_TRPS3, BCc_AOXSr2, SCc_BTS5 )	32.3529	99.9885	99.8041	93.2524	85.8671
KO ( SCc_ANS, BCc_TRPS3, SCc_DHFS, BCc_BTS5 )	32.3529	99.9884	99.8041	95.6308	71.3895
KO ( SCc_SHK3Dr, SCc_CHORS, BCc_TRPS3, SCc_AOXSr2, BCc_BTS5 )	32.3529	99.9884	99.8041	93.2524	66.0396
KO ( SCc_SHK3Dr, SCc_CHORS, BCc_TRPS3, BCc_AOXSr2, BCc_BTS5 )	32.3529	99.9882	99.8041	93.2524	58.6592
KO ( SCc_ANS, BCc_DHFS, SCc_AOXSr2, SCc_BTS5 )	32.3529	99.9809	100	71.3012	54.3739
KO ( SCc_ANS, BCc_DHFS, BCc_AOXSr2, SCc_BTS5 )	32.3529	99.9806	100	71.3012	85.8671
KO ( SCc_ANS, BCc_DHFS, SCc_AOXSr2, BCc_BTS5 )	32.3529	99.9805	100	71.3012	64.4003
KO ( SCc_ANS, BCc_DHFS, BCc_AOXSr2, BCc_BTS5 )	32.3529	99.9803	100	71.3012	58.6592
KO ( SCc_ANS, BCc_TRPS3, BCc_DHFS, SCc_AOXSr2 )	32.3529	99.9706	99.8041	71.3012	66.0877
KO ( SCc_ANS, BCc_TRPS3, BCc_DHFS, SCc_BTS5 )	32.3529	99.9706	99.8041	71.3012	100
KO ( SCc_ANS, BCc_TRPS3, BCc_DHFS, BCc_AOXSr2 )	32.3529	99.9703	99.8041	71.3012	85.8671
KO ( SCc_ANS, BCc_TRPS3, BCc_DHFS, BCc_BTS5 )	32.3529	99.9701	99.8041	71.3012	71.3895
KO ( SCc_SHK3Dr, SCc_CHORS, BCc_DHFS, SCc_AOXSr2 )	32.3529	99.9631	100	63.2246	66.0877
KO ( SCc_SHK3Dr, SCc_CHORS, BCc_DHFS, SCc_BTS5 )	32.3529	99.9631	100	63.2246	100
KO ( SCc_SHK3Dr, SCc_CHORS, BCc_DHFS, BCc_AOXSr2 )	32.3529	99.9628	100	63.2246	85.8671
KO ( SCc_SHK3Dr, SCc_CHORS, BCc_DHFS, BCc_BTS5 )	32.3529	99.9627	100	63.2246	71.3895
KO ( BCc_ANS, BCc_TRPS3, SCc_DHFS, SCc_AOXSr2 )	32.3529	99.9572	75.7557	95.6308	66.0877
KO ( BCc_ANS, BCc_TRPS3, SCc_DHFS, SCc_BTS5 )	32.3529	99.9572	75.7557	95.6308	100
KO ( BCc_ANS, SCc_DHFS, SCc_AOXSr2, SCc_BTS5 )	32.3529	99.9572	75.9926	95.6308	54.3739
KO ( BCc_ANS, SCc_DHFS, BCc_AOXSr2, SCc_BTS5 )	32.3529	99.9569	75.9926	95.6308	85.8671
KO ( BCc_ANS, BCc_TRPS3, SCc_DHFS, BCc_AOXSr2 )	32.3529	99.9569	75.7557	95.6308	85.8671
KO ( BCc_ANS, BCc_TRPS3, SCc_DHFS, BCc_BTS5 )	32.3529	99.9568	75.7557	95.6308	71.3895
KO ( BCc_ANS, SCc_DHFS, SCc_AOXSr2, BCc_BTS5 )	32.3529	99.9568	75.9926	95.6308	66.0396
KO ( BCc_ANS, SCc_DHFS, BCc_AOXSr2, BCc_BTS5 )	32.3529	99.9566	75.9926	95.6308	58.6592
KO ( SCc_SHK3Dr, SCc_CHORS, BCc_TRPS3, BCc_DHFS )	32.3529	99.9528	99.8041	63.2246	100
KO ( BCc_ANS, BCc_DHFS, SCc_AOXSr2, SCc_BTS5 )	32.3529	99.939	75.9926	71.3012	54.3739
KO ( BCc_ANS, BCc_TRPS3, BCc_DHFS, SCc_AOXSr2 )	32.3529	99.939	75.7557	71.3012	66.0877
KO ( BCc_ANS, BCc_TRPS3, BCc_DHFS, SCc_BTS5 )	32.3529	99.939	75.7557	71.3012	100
KO ( BCc_ANS, BCc_DHFS, BCc_AOXSr2, SCc_BTS5 )	32.3529	99.9387	75.9926	71.3012	85.8671
KO ( BCc_ANS, BCc_TRPS3, BCc_DHFS, BCc_AOXSr2 )	32.3529	99.9387	75.7557	71.3012	85.8671
KO ( BCc_ANS, BCc_DHFS, SCc_AOXSr2, BCc_BTS5 )	32.3529	99.9385	75.9926	71.3012	64.4003
KO ( BCc_ANS, BCc_TRPS3, BCc_DHFS, BCc_BTS5 )	32.3529	99.9385	75.7557	71.3012	71.3895
KO ( BCc_ANS, BCc_DHFS, BCc_AOXSr2, BCc_BTS5 )	32.3529	99.9383	75.9926	71.3012	58.6592
KO ( SCc_SHK3Dr, SCc_CHORS, SCc_TRPS3, SCc_AOXSr2, SCc_BTS5 )	32.3529	99.9143	64.666	93.2524	54.3739
KO ( SCc_ANS, SCc_TRPS3, SCc_DHFS, SCc_AOXSr2 )	32.3529	99.9143	79.562	95.6308	66.0877
KO ( SCc_ANS, SCc_TRPS3, SCc_DHFS, SCc_BTS5 )	32.3529	99.9143	79.562	95.6308	100
KO ( SCc_SHK3Dr, SCc_CHORS, SCc_TRPS3, SCc_DHFS )	32.3529	99.9143	64.666	93.2524	100
KO ( SCc_ANS, SCc_TRPS3, SCc_DHFS, BCc_AOXSr2 )	32.3529	99.914	79.562	95.6308	85.8671
KO ( SCc_SHK3Dr, SCc_CHORS, SCc_TRPS3, BCc_AOXSr2, SCc_BTS5 )	32.3529	99.914	64.666	93.2524	85.8671
KO ( SCc_SHK3Dr, SCc_CHORS, SCc_TRPS3, SCc_AOXSr2, BCc_BTS5 )	32.3529	99.9139	64.666	93.2524	66.0396
KO ( SCc_ANS, SCc_TRPS3, SCc_DHFS, BCc_BTS5 )	32.3529	99.9139	79.562	95.6308	71.3895
KO ( SCc_SHK3Dr, SCc_CHORS, SCc_TRPS3, BCc_AOXSr2, BCc_BTS5 )	32.3529	99.9136	64.666	93.2524	58.6592
KO ( SCc_ANS, SCc_TRPS3, BCc_DHFS, SCc_AOXSr2 )	32.3529	99.896	79.562	71.3012	66.0877
KO ( SCc_ANS, SCc_TRPS3, BCc_DHFS, SCc_BTS5 )	32.3529	99.896	79.562	71.3012	100
KO ( SCc_ANS, SCc_TRPS3, BCc_DHFS, BCc_AOXSr2 )	32.3529	99.8958	79.562	71.3012	85.8671
KO ( SCc_ANS, SCc_TRPS3, BCc_DHFS, BCc_BTS5 )	32.3529	99.8956	79.562	71.3012	71.3895
KO ( SCc_SHK3Dr, SCc_CHORS, SCc_TRPS3, BCc_DHFS )	32.3529	99.8783	64.666	63.2246	100
KO ( BCc_SHK3Dr, BCc_CHORS, BCc_TRPS3, SCc_AOXSr2, SCc_BTS5 )	32.3529	99.6053	64.421	73.149	54.3739
KO ( BCc_SHK3Dr, BCc_CHORS, BCc_TRPS3, BCc_AOXSr2, SCc_BTS5 )	32.3529	99.605	64.421	73.149	85.8671
KO ( BCc_SHK3Dr, BCc_CHORS, BCc_TRPS3, SCc_AOXSr2, BCc_BTS5 )	32.3529	99.6048	64.421	73.149	64.5949
KO ( BCc_SHK3Dr, BCc_CHORS, BCc_TRPS3, BCc_AOXSr2, BCc_BTS5 )	32.3529	99.6046	64.421	73.149	58.6592
KO ( BCc_SHK3Dr, BCc_CHORS, BCc_TRPS3, SCc_DHFS )	32.3529	99.6044	64.421	73.149	100
KO ( BCc_SHK3Dr, BCc_CHORS, SCc_DHFS, SCc_AOXSr2 )	32.3529	99.6044	75.163	73.149	66.0877
KO ( BCc_SHK3Dr, BCc_CHORS, SCc_DHFS, SCc_BTS5 )	32.3529	99.6044	75.163	73.149	100
KO ( BCc_SHK3Dr, BCc_CHORS, SCc_DHFS, BCc_AOXSr2 )	32.3529	99.6041	75.163	73.149	85.8671
KO ( BCc_SHK3Dr, BCc_CHORS, SCc_DHFS, BCc_BTS5 )	32.3529	99.6039	75.163	73.149	71.3895
KO ( BCc_SHK3Dr, BCc_CHORS, BCc_DHFS, SCc_AOXSr2 )	32.3529	99.5878	75.163	63.8108	66.0877
KO ( BCc_SHK3Dr, BCc_CHORS, BCc_DHFS, SCc_BTS5 )	32.3529	99.5878	75.163	63.8108	100
KO ( BCc_SHK3Dr, BCc_CHORS, BCc_TRPS3, BCc_DHFS )	32.3529	99.5878	64.421	63.8108	100
KO ( BCc_SHK3Dr, BCc_CHORS, BCc_DHFS, BCc_AOXSr2 )	32.3529	99.5875	75.163	63.8108	85.8671
KO ( BCc_SHK3Dr, BCc_CHORS, BCc_DHFS, BCc_BTS5 )	32.3529	99.5874	75.163	63.8108	71.3895
KO ( BCc_SHK3Dr, BCc_CHORS, SCc_TRPS3, SCc_AOXSr2, SCc_BTS5 )	32.3529	99.5182	75.163	73.149	54.3739
KO ( BCc_SHK3Dr, BCc_CHORS, SCc_TRPS3, BCc_AOXSr2, SCc_BTS5 )	32.3529	99.5179	75.163	73.149	85.8671
KO ( BCc_SHK3Dr, BCc_CHORS, SCc_TRPS3, SCc_AOXSr2, BCc_BTS5 )	32.3529	99.5178	75.163	73.149	64.5949
KO ( BCc_SHK3Dr, BCc_CHORS, SCc_TRPS3, BCc_AOXSr2, BCc_BTS5 )	32.3529	99.5176	75.163	73.149	58.6592
KO ( BCc_SHK3Dr, BCc_CHORS, SCc_TRPS3, SCc_DHFS )	32.3529	99.5173	75.163	73.149	100
KO ( BCc_SHK3Dr, BCc_CHORS, SCc_TRPS3, BCc_DHFS )	32.3529	99.5008	75.163	63.8108	100
KO ( BCc_ANS, SCc_TRPS3, SCc_DHFS, SCc_AOXSr2 )	32.3529	99.4998	69.0952	95.6308	66.0877
KO ( BCc_ANS, SCc_TRPS3, SCc_DHFS, SCc_BTS5 )	32.3529	99.4998	69.0952	95.6308	100
KO ( BCc_ANS, SCc_TRPS3, SCc_DHFS, BCc_AOXSr2 )	32.3529	99.4995	69.0952	95.6308	85.8671
KO ( BCc_ANS, SCc_TRPS3, SCc_DHFS, BCc_BTS5 )	32.3529	99.4993	69.0952	95.6308	71.3895
KO ( BCc_ANS, SCc_TRPS3, BCc_DHFS, SCc_AOXSr2 )	32.3529	99.4817	69.0952	71.3012	66.0877
KO ( BCc_ANS, SCc_TRPS3, BCc_DHFS, SCc_BTS5 )	32.3529	99.4817	69.0952	71.3012	100
KO ( BCc_ANS, SCc_TRPS3, BCc_DHFS, BCc_AOXSr2 )	32.3529	99.4814	69.0952	71.3012	85.8671
KO ( BCc_ANS, SCc_TRPS3, BCc_DHFS, BCc_BTS5 )	32.3529	99.4813	69.0952	71.3012	71.3895
KO ( SCc_SHK3Dr, BCc_CHORS, BCc_TRPS3, SCc_AOXSr2, SCc_BTS5 )	32.3529	98.3732	75.7557	87.7466	54.3739
KO ( SCc_SHK3Dr, BCc_CHORS, BCc_TRPS3, BCc_AOXSr2, SCc_BTS5 )	32.3529	98.373	75.7557	87.7466	85.8671
KO ( SCc_SHK3Dr, BCc_CHORS, BCc_TRPS3, SCc_AOXSr2, BCc_BTS5 )	32.3529	98.3728	75.7557	87.7466	64.4003
KO ( SCc_SHK3Dr, BCc_CHORS, BCc_TRPS3, BCc_AOXSr2, BCc_BTS5 )	32.3529	98.3726	75.7557	87.7466	58.6592
KO ( SCc_SHK3Dr, BCc_CHORS, BCc_TRPS3, SCc_DHFS )	32.3529	98.3724	75.7557	86.2162	100
KO ( SCc_SHK3Dr, BCc_CHORS, SCc_DHFS, SCc_AOXSr2 )	32.3529	98.3724	86.3667	86.2162	66.0877
KO ( SCc_SHK3Dr, BCc_CHORS, SCc_DHFS, SCc_BTS5 )	32.3529	98.3724	86.3667	86.2162	100
KO ( SCc_SHK3Dr, BCc_CHORS, SCc_DHFS, BCc_AOXSr2 )	32.3529	98.3721	86.3667	86.2162	85.8671
KO ( SCc_SHK3Dr, BCc_CHORS, SCc_DHFS, BCc_BTS5 )	32.3529	98.372	86.3667	86.2162	71.3895
KO ( SCc_SHK3Dr, BCc_CHORS, BCc_TRPS3, BCc_DHFS )	32.3529	98.3562	75.7557	71.3012	100
KO ( SCc_SHK3Dr, BCc_CHORS, BCc_DHFS, SCc_AOXSr2 )	32.3529	98.3562	86.3667	71.3012	66.0877
KO ( SCc_SHK3Dr, BCc_CHORS, BCc_DHFS, SCc_BTS5 )	32.3529	98.3562	86.3667	71.3012	100
KO ( SCc_SHK3Dr, BCc_CHORS, BCc_DHFS, BCc_AOXSr2 )	32.3529	98.3559	86.3667	71.3012	85.8671
KO ( SCc_SHK3Dr, BCc_CHORS, BCc_DHFS, BCc_BTS5 )	32.3529	98.3558	86.3667	71.3012	71.3895
KO ( SCc_SHK3Dr, BCc_CHORS, SCc_TRPS3, SCc_AOXSr2, SCc_BTS5 )	32.3529	98.2883	70.5483	87.7466	54.3739
KO ( SCc_SHK3Dr, BCc_CHORS, SCc_TRPS3, BCc_AOXSr2, SCc_BTS5 )	32.3529	98.2881	70.5483	87.7466	85.8671
KO ( SCc_SHK3Dr, BCc_CHORS, SCc_TRPS3, SCc_AOXSr2, BCc_BTS5 )	32.3529	98.2879	70.5483	87.7466	64.4003
KO ( SCc_SHK3Dr, BCc_CHORS, SCc_TRPS3, BCc_AOXSr2, BCc_BTS5 )	32.3529	98.2877	70.5483	87.7466	58.6592
KO ( SCc_SHK3Dr, BCc_CHORS, SCc_TRPS3, SCc_DHFS )	32.3529	98.2875	70.5483	86.2162	100
KO ( SCc_SHK3Dr, BCc_CHORS, SCc_TRPS3, BCc_DHFS )	32.3529	98.2713	70.5483	71.3012	100
KO ( BCc_SHK3Dr, SCc_CHORS, SCc_DHFS, SCc_AOXSr2 )	32.3529	97.8704	74.7483	79.4608	66.0877
KO ( BCc_SHK3Dr, SCc_CHORS, SCc_DHFS, SCc_BTS5 )	32.3529	97.8704	74.7483	79.4608	100
KO ( BCc_SHK3Dr, SCc_CHORS, SCc_DHFS, BCc_AOXSr2 )	32.3529	97.8701	74.7483	79.4608	85.8671
KO ( BCc_SHK3Dr, SCc_CHORS, SCc_DHFS, BCc_BTS5 )	32.3529	97.87	74.7483	79.4608	71.3895
KO ( BCc_SHK3Dr, SCc_CHORS, BCc_TRPS3, SCc_DHFS )	32.3529	97.8605	65.7951	79.4608	100
KO ( BCc_SHK3Dr, SCc_CHORS, BCc_TRPS3, SCc_AOXSr2, SCc_BTS5 )	32.3529	97.8605	65.7951	79.4608	54.3739
KO ( BCc_SHK3Dr, SCc_CHORS, BCc_TRPS3, BCc_AOXSr2, SCc_BTS5 )	32.3529	97.8602	65.7951	79.4608	85.8671
KO ( BCc_SHK3Dr, SCc_CHORS, BCc_TRPS3, SCc_AOXSr2, BCc_BTS5 )	32.3529	97.8601	65.7951	79.4608	65.4447
KO ( BCc_SHK3Dr, SCc_CHORS, BCc_TRPS3, BCc_AOXSr2, BCc_BTS5 )	32.3529	97.8599	65.7951	79.4608	58.6592
KO ( BCc_SHK3Dr, SCc_CHORS, BCc_DHFS, SCc_AOXSr2 )	32.3529	97.8359	74.7483	53.3624	66.0877
KO ( BCc_SHK3Dr, SCc_CHORS, BCc_DHFS, SCc_BTS5 )	32.3529	97.8359	74.7483	53.3624	100
KO ( BCc_SHK3Dr, SCc_CHORS, BCc_DHFS, BCc_AOXSr2 )	32.3529	97.8356	74.7483	53.3624	85.8671
KO ( BCc_SHK3Dr, SCc_CHORS, BCc_DHFS, BCc_BTS5 )	32.3529	97.8355	74.7483	53.3624	71.3895
KO ( BCc_SHK3Dr, SCc_CHORS, BCc_TRPS3, BCc_DHFS )	32.3529	97.826	65.7951	53.3624	100
KO ( BCc_SHK3Dr, SCc_CHORS, SCc_TRPS3, SCc_AOXSr2, SCc_BTS5 )	32.3529	97.7891	69.3226	79.4608	54.3739
KO ( BCc_SHK3Dr, SCc_CHORS, SCc_TRPS3, SCc_DHFS )	32.3529	97.7891	69.3226	79.4608	100
KO ( BCc_SHK3Dr, SCc_CHORS, SCc_TRPS3, BCc_AOXSr2, SCc_BTS5 )	32.3529	97.7888	69.3226	79.4608	85.8671
KO ( BCc_SHK3Dr, SCc_CHORS, SCc_TRPS3, SCc_AOXSr2, BCc_BTS5 )	32.3529	97.7887	69.3226	79.4608	65.4447
KO ( BCc_SHK3Dr, SCc_CHORS, SCc_TRPS3, BCc_AOXSr2, BCc_BTS5 )	32.3529	97.7885	69.3226	79.4608	58.6592
KO ( BCc_SHK3Dr, SCc_CHORS, SCc_TRPS3, BCc_DHFS )	32.3529	97.7546	69.3226	53.3624	100
KO ( SCc_SHK3Dr, SCc_ANS, SCc_DHFS, SCc_AOXSr2 )	30.8824	99.9992	100	93.2524	66.0877
KO ( SCc_SHK3Dr, SCc_ANS, SCc_DHFS, SCc_BTS5 )	30.8824	99.9992	100	93.2524	100
KO ( SCc_SHK3Dr, SCc_ANS, SCc_DHFS, BCc_AOXSr2 )	30.8824	99.9989	100	93.2524	85.8671
KO ( SCc_SHK3Dr, SCc_ANS, SCc_DHFS, BCc_BTS5 )	30.8824	99.9987	100	93.2524	71.3895
KO ( SCc_SHK3Dr, SCc_ANS, BCc_TRPS3, SCc_AOXSr2, SCc_BTS5 )	30.8824	99.9894	99.8041	97.2133	54.3739
KO ( SCc_SHK3Dr, SCc_ANS, BCc_TRPS3, BCc_AOXSr2, SCc_BTS5 )	30.8824	99.9891	99.8041	97.2133	85.8671
KO ( SCc_SHK3Dr, SCc_ANS, BCc_TRPS3, SCc_AOXSr2, BCc_BTS5 )	30.8824	99.989	99.8041	97.2133	66.0396
KO ( SCc_SHK3Dr, SCc_ANS, BCc_TRPS3, SCc_DHFS )	30.8824	99.9888	99.8041	93.2524	100
KO ( SCc_SHK3Dr, SCc_ANS, BCc_TRPS3, BCc_AOXSr2, BCc_BTS5 )	30.8824	99.9888	99.8041	97.2133	58.6592
KO ( SCc_SHK3Dr, SCc_ANS, BCc_DHFS, SCc_AOXSr2 )	30.8824	99.9759	100	71.3012	66.0877
KO ( SCc_SHK3Dr, SCc_ANS, BCc_DHFS, SCc_BTS5 )	30.8824	99.9759	100	71.3012	100
KO ( SCc_SHK3Dr, SCc_ANS, BCc_DHFS, BCc_AOXSr2 )	30.8824	99.9757	100	71.3012	85.8671
KO ( SCc_SHK3Dr, SCc_ANS, BCc_DHFS, BCc_BTS5 )	30.8824	99.9755	100	71.3012	71.3895
KO ( SCc_SHK3Dr, SCc_ANS, BCc_TRPS3, BCc_DHFS )	30.8824	99.9656	99.8041	71.3012	100
KO ( SCc_SHK3Dr, SCc_ANS, SCc_TRPS3, SCc_AOXSr2, SCc_BTS5 )	30.8824	99.9149	64.666	97.2133	54.3739
KO ( SCc_SHK3Dr, SCc_ANS, SCc_TRPS3, BCc_AOXSr2, SCc_BTS5 )	30.8824	99.9146	64.666	97.2133	85.8671
KO ( SCc_SHK3Dr, SCc_ANS, SCc_TRPS3, SCc_AOXSr2, BCc_BTS5 )	30.8824	99.9144	64.666	97.2133	66.0396
KO ( SCc_SHK3Dr, SCc_ANS, SCc_TRPS3, SCc_DHFS )	30.8824	99.9143	64.666	93.2524	100
KO ( SCc_SHK3Dr, SCc_ANS, SCc_TRPS3, BCc_AOXSr2, BCc_BTS5 )	30.8824	99.9142	64.666	97.2133	58.6592
KO ( SCc_SHK3Dr, SCc_ANS, SCc_TRPS3, BCc_DHFS )	30.8824	99.8911	64.666	71.3012	100
KO ( SCc_SHK3Dr, BCc_ANS, BCc_TRPS3, SCc_AOXSr2, SCc_BTS5 )	30.8824	99.817	75.7557	97.2133	54.3739
KO ( SCc_SHK3Dr, BCc_ANS, BCc_TRPS3, BCc_AOXSr2, SCc_BTS5 )	30.8824	99.8167	75.7557	97.2133	85.8671
KO ( SCc_SHK3Dr, BCc_ANS, BCc_TRPS3, SCc_AOXSr2, BCc_BTS5 )	30.8824	99.8165	75.7557	97.2133	66.0396
KO ( SCc_SHK3Dr, BCc_ANS, BCc_TRPS3, SCc_DHFS )	30.8824	99.8164	75.7557	93.2524	100
KO ( SCc_SHK3Dr, BCc_ANS, SCc_DHFS, SCc_AOXSr2 )	30.8824	99.8164	75.9926	93.2524	66.0877
KO ( SCc_SHK3Dr, BCc_ANS, SCc_DHFS, SCc_BTS5 )	30.8824	99.8164	75.9926	93.2524	100
KO ( SCc_SHK3Dr, BCc_ANS, BCc_TRPS3, BCc_AOXSr2, BCc_BTS5 )	30.8824	99.8163	75.7557	97.2133	58.6592
KO ( SCc_SHK3Dr, BCc_ANS, SCc_DHFS, BCc_AOXSr2 )	30.8824	99.8161	75.9926	93.2524	85.8671
KO ( SCc_SHK3Dr, BCc_ANS, SCc_DHFS, BCc_BTS5 )	30.8824	99.816	75.9926	93.2524	71.3895
KO ( SCc_SHK3Dr, BCc_ANS, BCc_DHFS, SCc_AOXSr2 )	30.8824	99.7932	75.9926	71.3012	66.0877
KO ( SCc_SHK3Dr, BCc_ANS, BCc_DHFS, SCc_BTS5 )	30.8824	99.7932	75.9926	71.3012	100
KO ( SCc_SHK3Dr, BCc_ANS, BCc_TRPS3, BCc_DHFS )	30.8824	99.7932	75.7557	71.3012	100
KO ( SCc_SHK3Dr, BCc_ANS, BCc_DHFS, BCc_AOXSr2 )	30.8824	99.793	75.9926	71.3012	85.8671
KO ( SCc_SHK3Dr, BCc_ANS, BCc_DHFS, BCc_BTS5 )	30.8824	99.7928	75.9926	71.3012	71.3895
KO ( BCc_SHK3Dr, BCc_ANS, BCc_TRPS3, SCc_AOXSr2, SCc_BTS5 )	30.8824	99.6053	64.421	79.4608	54.3739
KO ( BCc_SHK3Dr, BCc_ANS, BCc_TRPS3, BCc_AOXSr2, SCc_BTS5 )	30.8824	99.605	64.421	79.4608	85.8671
KO ( BCc_SHK3Dr, BCc_ANS, BCc_TRPS3, SCc_AOXSr2, BCc_BTS5 )	30.8824	99.6048	64.421	79.4608	65.4447
KO ( BCc_SHK3Dr, BCc_ANS, BCc_TRPS3, BCc_AOXSr2, BCc_BTS5 )	30.8824	99.6046	64.421	79.4608	58.6592
KO ( BCc_SHK3Dr, BCc_ANS, BCc_TRPS3, SCc_DHFS )	30.8824	99.6044	64.421	79.4608	100
KO ( BCc_SHK3Dr, BCc_ANS, SCc_DHFS, SCc_AOXSr2 )	30.8824	99.6044	64.421	79.4608	66.0877
KO ( BCc_SHK3Dr, BCc_ANS, SCc_DHFS, SCc_BTS5 )	30.8824	99.6044	64.421	79.4608	100
KO ( BCc_SHK3Dr, BCc_ANS, SCc_DHFS, BCc_AOXSr2 )	30.8824	99.6041	64.421	79.4608	85.8671
KO ( BCc_SHK3Dr, BCc_ANS, SCc_DHFS, BCc_BTS5 )	30.8824	99.6039	64.421	79.4608	71.3895
KO ( BCc_SHK3Dr, SCc_ANS, SCc_DHFS, SCc_AOXSr2 )	30.8824	99.6015	75.922	79.4608	66.0877
KO ( BCc_SHK3Dr, SCc_ANS, SCc_DHFS, SCc_BTS5 )	30.8824	99.6015	75.922	79.4608	100
KO ( BCc_SHK3Dr, SCc_ANS, SCc_DHFS, BCc_AOXSr2 )	30.8824	99.6012	75.922	79.4608	85.8671
KO ( BCc_SHK3Dr, SCc_ANS, SCc_DHFS, BCc_BTS5 )	30.8824	99.6011	75.922	79.4608	71.3895
KO ( BCc_SHK3Dr, SCc_ANS, BCc_TRPS3, SCc_AOXSr2, SCc_BTS5 )	30.8824	99.5922	65.7951	79.4608	54.3739
KO ( BCc_SHK3Dr, SCc_ANS, BCc_TRPS3, BCc_AOXSr2, SCc_BTS5 )	30.8824	99.5919	65.7951	79.4608	85.8671
KO ( BCc_SHK3Dr, SCc_ANS, BCc_TRPS3, SCc_AOXSr2, BCc_BTS5 )	30.8824	99.5917	65.7951	79.4608	65.4447
KO ( BCc_SHK3Dr, SCc_ANS, BCc_TRPS3, BCc_AOXSr2, BCc_BTS5 )	30.8824	99.5915	65.7951	79.4608	58.6592
KO ( BCc_SHK3Dr, SCc_ANS, BCc_TRPS3, SCc_DHFS )	30.8824	99.5913	65.7951	79.4608	100
KO ( BCc_SHK3Dr, BCc_ANS, BCc_DHFS, SCc_AOXSr2 )	30.8824	99.5878	64.421	63.8108	66.0877
KO ( BCc_SHK3Dr, BCc_ANS, BCc_DHFS, SCc_BTS5 )	30.8824	99.5878	64.421	63.8108	100
KO ( BCc_SHK3Dr, BCc_ANS, BCc_TRPS3, BCc_DHFS )	30.8824	99.5878	64.421	63.8108	100
KO ( BCc_SHK3Dr, BCc_ANS, BCc_DHFS, BCc_AOXSr2 )	30.8824	99.5875	64.421	63.8108	85.8671
KO ( BCc_SHK3Dr, BCc_ANS, BCc_DHFS, BCc_BTS5 )	30.8824	99.5874	64.421	63.8108	71.3895
KO ( BCc_SHK3Dr, SCc_ANS, BCc_DHFS, SCc_AOXSr2 )	30.8824	99.585	75.922	63.8108	66.0877
KO ( BCc_SHK3Dr, SCc_ANS, BCc_DHFS, SCc_BTS5 )	30.8824	99.585	75.922	63.8108	100
KO ( BCc_SHK3Dr, SCc_ANS, BCc_DHFS, BCc_AOXSr2 )	30.8824	99.5847	75.922	63.8108	85.8671
KO ( BCc_SHK3Dr, SCc_ANS, BCc_DHFS, BCc_BTS5 )	30.8824	99.5846	75.922	63.8108	71.3895
KO ( BCc_SHK3Dr, SCc_ANS, BCc_TRPS3, BCc_DHFS )	30.8824	99.5747	65.7951	63.8108	100
KO ( BCc_SHK3Dr, SCc_ANS, SCc_TRPS3, SCc_AOXSr2, SCc_BTS5 )	30.8824	99.5182	75.922	79.4608	54.3739
KO ( BCc_SHK3Dr, SCc_ANS, SCc_TRPS3, BCc_AOXSr2, SCc_BTS5 )	30.8824	99.5179	75.922	79.4608	85.8671
KO ( BCc_SHK3Dr, SCc_ANS, SCc_TRPS3, SCc_AOXSr2, BCc_BTS5 )	30.8824	99.5178	75.922	79.4608	65.4447
KO ( BCc_SHK3Dr, SCc_ANS, SCc_TRPS3, BCc_AOXSr2, BCc_BTS5 )	30.8824	99.5176	75.922	79.4608	58.6592
KO ( BCc_SHK3Dr, SCc_ANS, SCc_TRPS3, SCc_DHFS )	30.8824	99.5173	75.922	79.4608	100
KO ( BCc_SHK3Dr, SCc_ANS, SCc_TRPS3, BCc_DHFS )	30.8824	99.5008	75.922	63.8108	100
KO ( SCc_SHK3Dr, BCc_ANS, SCc_TRPS3, SCc_AOXSr2, SCc_BTS5 )	30.8824	99.3608	68.0949	97.2133	54.3739
KO ( SCc_SHK3Dr, BCc_ANS, SCc_TRPS3, BCc_AOXSr2, SCc_BTS5 )	30.8824	99.3605	68.0949	97.2133	85.8671
KO ( SCc_SHK3Dr, BCc_ANS, SCc_TRPS3, SCc_AOXSr2, BCc_BTS5 )	30.8824	99.3604	68.0949	97.2133	66.0396
KO ( SCc_SHK3Dr, BCc_ANS, SCc_TRPS3, SCc_DHFS )	30.8824	99.3602	68.0949	93.2524	100
KO ( SCc_SHK3Dr, BCc_ANS, SCc_TRPS3, BCc_AOXSr2, BCc_BTS5 )	30.8824	99.3602	68.0949	97.2133	58.6592
KO ( SCc_SHK3Dr, BCc_ANS, SCc_TRPS3, BCc_DHFS )	30.8824	99.3373	68.0949	71.3012	100
KO ( BCc_SHK3Dr, BCc_ANS, SCc_TRPS3, SCc_AOXSr2, SCc_BTS5 )	30.8824	99.151	59.6414	79.4608	54.3739
KO ( BCc_SHK3Dr, BCc_ANS, SCc_TRPS3, BCc_AOXSr2, SCc_BTS5 )	30.8824	99.1507	58.8917	79.4608	85.8671
KO ( BCc_SHK3Dr, BCc_ANS, SCc_TRPS3, SCc_AOXSr2, BCc_BTS5 )	30.8824	99.1506	58.8917	79.4608	65.4447
KO ( BCc_SHK3Dr, BCc_ANS, SCc_TRPS3, BCc_AOXSr2, BCc_BTS5 )	30.8824	99.1504	58.8917	79.4608	58.6592
KO ( BCc_SHK3Dr, BCc_ANS, SCc_TRPS3, SCc_DHFS )	30.8824	99.1501	59.6414	79.4608	100
KO ( BCc_SHK3Dr, BCc_ANS, SCc_TRPS3, BCc_DHFS )	30.8824	99.1337	59.6414	63.8108	100
KO ( SCc_CHORS, SCc_ANS, SCc_DHFS, SCc_AOXSr2 )	29.4118	99.9992	100	93.2524	66.0877
KO ( SCc_CHORS, SCc_ANS, SCc_DHFS, SCc_BTS5 )	29.4118	99.9992	100	93.2524	100
KO ( SCc_DHFS, SCc_AOXSr2, SCc_BTS5 )	29.4118	99.9992	100	95.6308	54.3739
KO ( SCc_CHORS, SCc_ANS, SCc_DHFS, BCc_AOXSr2 )	29.4118	99.9989	100	93.2524	85.8671
KO ( SCc_DHFS, BCc_AOXSr2, SCc_BTS5 )	29.4118	99.9989	100	95.6308	85.8671
KO ( SCc_DHFS, SCc_AOXSr2, BCc_BTS5 )	29.4118	99.9987	100	95.6308	66.0396
KO ( SCc_CHORS, SCc_ANS, SCc_DHFS, BCc_BTS5 )	29.4118	99.9987	100	93.2524	71.3895
KO ( SCc_DHFS, BCc_AOXSr2, BCc_BTS5 )	29.4118	99.9985	100	95.6308	58.6592
KO ( SCc_CHORS, SCc_ANS, BCc_TRPS3, SCc_AOXSr2, SCc_BTS5 )	29.4118	99.9888	99.8041	93.2524	54.3739
KO ( BCc_TRPS3, SCc_DHFS, SCc_AOXSr2 )	29.4118	99.9888	99.8041	95.6308	66.0877
KO ( BCc_TRPS3, SCc_DHFS, SCc_BTS5 )	29.4118	99.9888	99.8041	95.6308	100
KO ( SCc_CHORS, SCc_ANS, BCc_TRPS3, SCc_DHFS )	29.4118	99.9888	99.8041	93.2524	100
KO ( BCc_TRPS3, SCc_DHFS, BCc_AOXSr2 )	29.4118	99.9885	99.8041	95.6308	85.8671
KO ( SCc_CHORS, SCc_ANS, BCc_TRPS3, BCc_AOXSr2, SCc_BTS5 )	29.4118	99.9885	99.8041	93.2524	85.8671
KO ( BCc_TRPS3, SCc_DHFS, BCc_BTS5 )	29.4118	99.9884	99.8041	95.6308	71.3895
KO ( SCc_CHORS, SCc_ANS, BCc_TRPS3, SCc_AOXSr2, BCc_BTS5 )	29.4118	99.9884	99.8041	93.2524	66.0396
KO ( SCc_CHORS, SCc_ANS, BCc_TRPS3, BCc_AOXSr2, BCc_BTS5 )	29.4118	99.9882	99.8041	93.2524	58.6592
KO ( BCc_DHFS, SCc_AOXSr2, SCc_BTS5 )	29.4118	99.9809	100	71.3012	54.3739
KO ( BCc_DHFS, BCc_AOXSr2, SCc_BTS5 )	29.4118	99.9806	100	71.3012	85.8671
KO ( BCc_DHFS, SCc_AOXSr2, BCc_BTS5 )	29.4118	99.9805	100	71.3012	64.4003
KO ( BCc_DHFS, BCc_AOXSr2, BCc_BTS5 )	29.4118	99.9803	100	71.3012	58.6592
KO ( BCc_TRPS3, BCc_DHFS, SCc_AOXSr2 )	29.4118	99.9706	99.8041	71.3012	66.0877
KO ( BCc_TRPS3, BCc_DHFS, SCc_BTS5 )	29.4118	99.9706	99.8041	71.3012	100
KO ( BCc_TRPS3, BCc_DHFS, BCc_AOXSr2 )	29.4118	99.9703	99.8041	71.3012	85.8671
KO ( BCc_TRPS3, BCc_DHFS, BCc_BTS5 )	29.4118	99.9701	99.8041	71.3012	71.3895
KO ( SCc_CHORS, SCc_ANS, BCc_DHFS, SCc_AOXSr2 )	29.4118	99.9631	100	63.2246	66.0877
KO ( SCc_CHORS, SCc_ANS, BCc_DHFS, SCc_BTS5 )	29.4118	99.9631	100	63.2246	100
KO ( SCc_CHORS, SCc_ANS, BCc_DHFS, BCc_AOXSr2 )	29.4118	99.9628	100	63.2246	85.8671
KO ( SCc_CHORS, SCc_ANS, BCc_DHFS, BCc_BTS5 )	29.4118	99.9627	100	63.2246	71.3895
KO ( SCc_CHORS, SCc_ANS, BCc_TRPS3, BCc_DHFS )	29.4118	99.9528	99.8041	63.2246	100
KO ( SCc_CHORS, SCc_ANS, SCc_TRPS3, SCc_AOXSr2, SCc_BTS5 )	29.4118	99.9143	69.3226	93.2524	54.3739
KO ( SCc_CHORS, SCc_ANS, SCc_TRPS3, SCc_DHFS )	29.4118	99.9143	69.3226	93.2524	100
KO ( SCc_TRPS3, SCc_DHFS, SCc_AOXSr2 )	29.4118	99.9143	80.2992	95.6308	66.0877
KO ( SCc_TRPS3, SCc_DHFS, SCc_BTS5 )	29.4118	99.9143	80.2992	95.6308	100
KO ( SCc_TRPS3, SCc_DHFS, BCc_AOXSr2 )	29.4118	99.914	80.2992	95.6308	85.8671
KO ( SCc_CHORS, SCc_ANS, SCc_TRPS3, BCc_AOXSr2, SCc_BTS5 )	29.4118	99.914	69.3226	93.2524	85.8671
KO ( SCc_CHORS, SCc_ANS, SCc_TRPS3, SCc_AOXSr2, BCc_BTS5 )	29.4118	99.9139	69.3226	93.2524	66.0396
KO ( SCc_TRPS3, SCc_DHFS, BCc_BTS5 )	29.4118	99.9139	80.2992	95.6308	71.3895
KO ( SCc_CHORS, SCc_ANS, SCc_TRPS3, BCc_AOXSr2, BCc_BTS5 )	29.4118	99.9136	69.3226	93.2524	58.6592
KO ( SCc_TRPS3, BCc_DHFS, SCc_AOXSr2 )	29.4118	99.896	80.2992	71.3012	66.0877
KO ( SCc_TRPS3, BCc_DHFS, SCc_BTS5 )	29.4118	99.896	80.2992	71.3012	100
KO ( SCc_TRPS3, BCc_DHFS, BCc_AOXSr2 )	29.4118	99.8958	80.2992	71.3012	85.8671
KO ( SCc_TRPS3, BCc_DHFS, BCc_BTS5 )	29.4118	99.8956	80.2992	71.3012	71.3895
KO ( SCc_CHORS, SCc_ANS, SCc_TRPS3, BCc_DHFS )	29.4118	99.8783	69.3226	63.2246	100
KO ( BCc_CHORS, BCc_ANS, BCc_TRPS3, SCc_AOXSr2, SCc_BTS5 )	29.4118	99.6053	75.7557	87.7466	54.3739
KO ( BCc_CHORS, BCc_ANS, BCc_TRPS3, BCc_AOXSr2, SCc_BTS5 )	29.4118	99.605	75.7557	87.7466	85.8671
KO ( BCc_CHORS, BCc_ANS, BCc_TRPS3, SCc_AOXSr2, BCc_BTS5 )	29.4118	99.6048	75.7557	87.7466	64.5949
KO ( BCc_CHORS, BCc_ANS, BCc_TRPS3, BCc_AOXSr2, BCc_BTS5 )	29.4118	99.6046	75.7557	87.7466	58.6592
KO ( BCc_CHORS, BCc_ANS, SCc_DHFS, SCc_AOXSr2 )	29.4118	99.6044	75.9926	86.2162	66.0877
KO ( BCc_CHORS, BCc_ANS, SCc_DHFS, SCc_BTS5 )	29.4118	99.6044	75.9926	86.2162	100
KO ( BCc_CHORS, BCc_ANS, BCc_TRPS3, SCc_DHFS )	29.4118	99.6044	75.7557	86.2162	100
KO ( BCc_CHORS, BCc_ANS, SCc_DHFS, BCc_AOXSr2 )	29.4118	99.6041	75.9926	86.2162	85.8671
KO ( BCc_CHORS, BCc_ANS, SCc_DHFS, BCc_BTS5 )	29.4118	99.6039	75.9926	86.2162	71.3895
KO ( BCc_CHORS, SCc_ANS, SCc_DHFS, SCc_AOXSr2 )	29.4118	99.6015	82.9894	86.2162	66.0877
KO ( BCc_CHORS, SCc_ANS, SCc_DHFS, SCc_BTS5 )	29.4118	99.6015	82.9894	86.2162	100
KO ( BCc_CHORS, SCc_ANS, SCc_DHFS, BCc_AOXSr2 )	29.4118	99.6012	82.9894	86.2162	85.8671
KO ( BCc_CHORS, SCc_ANS, SCc_DHFS, BCc_BTS5 )	29.4118	99.6011	82.9894	86.2162	71.3895
KO ( BCc_CHORS, SCc_ANS, BCc_TRPS3, SCc_AOXSr2, SCc_BTS5 )	29.4118	99.5922	75.2806	87.7466	54.3739
KO ( BCc_CHORS, SCc_ANS, BCc_TRPS3, BCc_AOXSr2, SCc_BTS5 )	29.4118	99.5919	75.2806	87.7466	85.8671
KO ( BCc_CHORS, SCc_ANS, BCc_TRPS3, SCc_AOXSr2, BCc_BTS5 )	29.4118	99.5917	75.2806	87.7466	64.5949
KO ( BCc_CHORS, SCc_ANS, BCc_TRPS3, BCc_AOXSr2, BCc_BTS5 )	29.4118	99.5915	75.2806	87.7466	58.6592
KO ( BCc_CHORS, SCc_ANS, BCc_TRPS3, SCc_DHFS )	29.4118	99.5913	75.2806	86.2162	100
KO ( BCc_CHORS, BCc_ANS, BCc_TRPS3, BCc_DHFS )	29.4118	99.5878	75.7557	71.3012	100
KO ( BCc_CHORS, BCc_ANS, BCc_DHFS, SCc_AOXSr2 )	29.4118	99.5878	75.9926	71.3012	66.0877
KO ( BCc_CHORS, BCc_ANS, BCc_DHFS, SCc_BTS5 )	29.4118	99.5878	75.9926	71.3012	100
KO ( BCc_CHORS, BCc_ANS, BCc_DHFS, BCc_AOXSr2 )	29.4118	99.5875	75.9926	71.3012	85.8671
KO ( BCc_CHORS, BCc_ANS, BCc_DHFS, BCc_BTS5 )	29.4118	99.5874	75.9926	71.3012	71.3895
KO ( BCc_CHORS, SCc_ANS, BCc_DHFS, SCc_AOXSr2 )	29.4118	99.585	82.9894	71.3012	66.0877
KO ( BCc_CHORS, SCc_ANS, BCc_DHFS, SCc_BTS5 )	29.4118	99.585	82.9894	71.3012	100
KO ( BCc_CHORS, SCc_ANS, BCc_DHFS, BCc_AOXSr2 )	29.4118	99.5847	82.9894	71.3012	85.8671
KO ( BCc_CHORS, SCc_ANS, BCc_DHFS, BCc_BTS5 )	29.4118	99.5846	82.9894	71.3012	71.3895
KO ( BCc_CHORS, SCc_ANS, BCc_TRPS3, BCc_DHFS )	29.4118	99.5747	75.2806	71.3012	100
KO ( BCc_CHORS, SCc_ANS, SCc_TRPS3, SCc_AOXSr2, SCc_BTS5 )	29.4118	99.5182	77.8564	87.7466	54.3739
KO ( BCc_CHORS, SCc_ANS, SCc_TRPS3, BCc_AOXSr2, SCc_BTS5 )	29.4118	99.5179	77.8564	87.7466	85.8671
KO ( BCc_CHORS, SCc_ANS, SCc_TRPS3, SCc_AOXSr2, BCc_BTS5 )	29.4118	99.5178	77.8564	87.7466	64.5949
KO ( BCc_CHORS, SCc_ANS, SCc_TRPS3, BCc_AOXSr2, BCc_BTS5 )	29.4118	99.5176	77.8564	87.7466	58.6592
KO ( BCc_CHORS, SCc_ANS, SCc_TRPS3, SCc_DHFS )	29.4118	99.5173	77.8564	86.2162	100
KO ( BCc_CHORS, SCc_ANS, SCc_TRPS3, BCc_DHFS )	29.4118	99.5008	77.8564	71.3012	100
KO ( SCc_CHORS, BCc_ANS, BCc_TRPS3, SCc_AOXSr2, SCc_BTS5 )	29.4118	99.4545	68.443	93.2524	54.3739
KO ( SCc_CHORS, BCc_ANS, BCc_TRPS3, SCc_DHFS )	29.4118	99.4545	68.443	93.2524	100
KO ( SCc_CHORS, BCc_ANS, SCc_DHFS, SCc_AOXSr2 )	29.4118	99.4545	68.443	93.2524	66.0877
KO ( SCc_CHORS, BCc_ANS, SCc_DHFS, SCc_BTS5 )	29.4118	99.4545	68.443	93.2524	100
KO ( SCc_CHORS, BCc_ANS, BCc_TRPS3, BCc_AOXSr2, SCc_BTS5 )	29.4118	99.4542	68.443	93.2524	85.8671
KO ( SCc_CHORS, BCc_ANS, SCc_DHFS, BCc_AOXSr2 )	29.4118	99.4542	68.443	93.2524	85.8671
KO ( SCc_CHORS, BCc_ANS, SCc_DHFS, BCc_BTS5 )	29.4118	99.4541	68.443	93.2524	71.3895
KO ( SCc_CHORS, BCc_ANS, BCc_TRPS3, SCc_AOXSr2, BCc_BTS5 )	29.4118	99.4541	68.443	93.2524	66.0396
KO ( SCc_CHORS, BCc_ANS, BCc_TRPS3, BCc_AOXSr2, BCc_BTS5 )	29.4118	99.4539	68.443	93.2524	58.6592
KO ( SCc_CHORS, BCc_ANS, BCc_DHFS, SCc_AOXSr2 )	29.4118	99.4189	68.443	63.2246	66.0877
KO ( SCc_CHORS, BCc_ANS, BCc_DHFS, SCc_BTS5 )	29.4118	99.4189	68.443	63.2246	100
KO ( SCc_CHORS, BCc_ANS, BCc_TRPS3, BCc_DHFS )	29.4118	99.4189	68.443	63.2246	100
KO ( SCc_CHORS, BCc_ANS, BCc_DHFS, BCc_AOXSr2 )	29.4118	99.4186	68.443	63.2246	85.8671
KO ( SCc_CHORS, BCc_ANS, BCc_DHFS, BCc_BTS5 )	29.4118	99.4184	68.443	63.2246	71.3895
KO ( BCc_CHORS, BCc_ANS, SCc_TRPS3, SCc_AOXSr2, SCc_BTS5 )	29.4118	99.151	69.0952	87.7466	54.3739
KO ( BCc_CHORS, BCc_ANS, SCc_TRPS3, BCc_AOXSr2, SCc_BTS5 )	29.4118	99.1507	69.0952	87.7466	85.8671
KO ( BCc_CHORS, BCc_ANS, SCc_TRPS3, SCc_AOXSr2, BCc_BTS5 )	29.4118	99.1506	69.0952	87.7466	64.5949
KO ( BCc_CHORS, BCc_ANS, SCc_TRPS3, BCc_AOXSr2, BCc_BTS5 )	29.4118	99.1504	69.0952	87.7466	58.6592
KO ( BCc_CHORS, BCc_ANS, SCc_TRPS3, SCc_DHFS )	29.4118	99.1501	69.0952	86.2162	100
KO ( BCc_CHORS, BCc_ANS, SCc_TRPS3, BCc_DHFS )	29.4118	99.1337	69.0952	71.3012	100
KO ( SCc_CHORS, BCc_ANS, SCc_TRPS3, SCc_AOXSr2, SCc_BTS5 )	29.4118	99.0017	55.5082	93.2524	54.3739
KO ( SCc_CHORS, BCc_ANS, SCc_TRPS3, SCc_DHFS )	29.4118	99.0017	55.5082	93.2524	100
KO ( SCc_CHORS, BCc_ANS, SCc_TRPS3, BCc_AOXSr2, SCc_BTS5 )	29.4118	99.0014	55.5082	93.2524	85.8671
KO ( SCc_CHORS, BCc_ANS, SCc_TRPS3, SCc_AOXSr2, BCc_BTS5 )	29.4118	99.0012	55.5082	93.2524	66.0396
KO ( SCc_CHORS, BCc_ANS, SCc_TRPS3, BCc_AOXSr2, BCc_BTS5 )	29.4118	99.001	55.5082	93.2524	58.6592
KO ( SCc_CHORS, BCc_ANS, SCc_TRPS3, BCc_DHFS )	29.4118	98.9663	55.5082	63.2246	100
KO ( SCc_SHK3Dr, SCc_CHORS, SCc_ANS, SCc_AOXSr2, SCc_BTS5 )	27.9412	99.9992	100	93.2524	54.3739
KO ( SCc_SHK3Dr, SCc_CHORS, SCc_ANS, SCc_DHFS )	27.9412	99.9992	100	93.2524	100
KO ( SCc_SHK3Dr, SCc_DHFS, SCc_AOXSr2 )	27.9412	99.9992	100	93.2524	66.0877
KO ( SCc_SHK3Dr, SCc_DHFS, SCc_BTS5 )	27.9412	99.9992	100	93.2524	100
KO ( SCc_SHK3Dr, SCc_CHORS, SCc_ANS, BCc_AOXSr2, SCc_BTS5 )	27.9412	99.9989	100	93.2524	85.8671
KO ( SCc_SHK3Dr, SCc_DHFS, BCc_AOXSr2 )	27.9412	99.9989	100	93.2524	85.8671
KO ( SCc_SHK3Dr, SCc_DHFS, BCc_BTS5 )	27.9412	99.9987	100	93.2524	71.3895
KO ( SCc_SHK3Dr, SCc_CHORS, SCc_ANS, SCc_AOXSr2, BCc_BTS5 )	27.9412	99.9987	100	93.2524	66.0396
KO ( SCc_SHK3Dr, SCc_CHORS, SCc_ANS, BCc_AOXSr2, BCc_BTS5 )	27.9412	99.9985	100	93.2524	58.6592
KO ( SCc_SHK3Dr, BCc_TRPS3, SCc_AOXSr2, SCc_BTS5 )	27.9412	99.9894	99.8041	97.2133	54.3739
KO ( SCc_SHK3Dr, BCc_TRPS3, BCc_AOXSr2, SCc_BTS5 )	27.9412	99.9891	99.8041	97.2133	85.8671
KO ( SCc_SHK3Dr, BCc_TRPS3, SCc_AOXSr2, BCc_BTS5 )	27.9412	99.989	99.8041	97.2133	66.0396
KO ( SCc_SHK3Dr, BCc_TRPS3, SCc_DHFS )	27.9412	99.9888	99.8041	93.2524	100
KO ( SCc_SHK3Dr, SCc_CHORS, SCc_ANS, BCc_TRPS3, SCc_AOXSr2 )	27.9412	99.9888	99.8041	93.2524	66.0877
KO ( SCc_SHK3Dr, SCc_CHORS, SCc_ANS, BCc_TRPS3, SCc_BTS5 )	27.9412	99.9888	99.8041	93.2524	100
KO ( SCc_SHK3Dr, BCc_TRPS3, BCc_AOXSr2, BCc_BTS5 )	27.9412	99.9888	99.8041	97.2133	58.6592
KO ( SCc_SHK3Dr, SCc_CHORS, SCc_ANS, BCc_TRPS3, BCc_AOXSr2 )	27.9412	99.9885	99.8041	93.2524	85.8671
KO ( SCc_SHK3Dr, SCc_CHORS, SCc_ANS, BCc_TRPS3, BCc_BTS5 )	27.9412	99.9884	99.8041	93.2524	71.3895
KO ( SCc_SHK3Dr, BCc_DHFS, SCc_AOXSr2 )	27.9412	99.9759	100	71.3012	66.0877
KO ( SCc_SHK3Dr, BCc_DHFS, SCc_BTS5 )	27.9412	99.9759	100	71.3012	100
KO ( SCc_SHK3Dr, BCc_DHFS, BCc_AOXSr2 )	27.9412	99.9757	100	71.3012	85.8671
KO ( SCc_SHK3Dr, BCc_DHFS, BCc_BTS5 )	27.9412	99.9755	100	71.3012	71.3895
KO ( SCc_SHK3Dr, BCc_TRPS3, BCc_DHFS )	27.9412	99.9656	99.8041	71.3012	100
KO ( SCc_SHK3Dr, SCc_CHORS, SCc_ANS, BCc_DHFS )	27.9412	99.9631	100	63.2246	100
KO ( SCc_SHK3Dr, SCc_TRPS3, SCc_AOXSr2, SCc_BTS5 )	27.9412	99.9149	71.51	97.2133	54.3739
KO ( SCc_SHK3Dr, SCc_TRPS3, BCc_AOXSr2, SCc_BTS5 )	27.9412	99.9146	71.51	97.2133	85.8671
KO ( SCc_SHK3Dr, SCc_TRPS3, SCc_AOXSr2, BCc_BTS5 )	27.9412	99.9144	71.51	97.2133	66.0396
KO ( SCc_SHK3Dr, SCc_CHORS, SCc_ANS, SCc_TRPS3, SCc_AOXSr2 )	27.9412	99.9143	64.666	93.2524	66.0877
KO ( SCc_SHK3Dr, SCc_CHORS, SCc_ANS, SCc_TRPS3, SCc_BTS5 )	27.9412	99.9143	64.666	93.2524	100
KO ( SCc_SHK3Dr, SCc_TRPS3, SCc_DHFS )	27.9412	99.9143	71.51	93.2524	100
KO ( SCc_SHK3Dr, SCc_TRPS3, BCc_AOXSr2, BCc_BTS5 )	27.9412	99.9142	71.51	97.2133	58.6592
KO ( SCc_SHK3Dr, SCc_CHORS, SCc_ANS, SCc_TRPS3, BCc_AOXSr2 )	27.9412	99.914	64.666	93.2524	85.8671
KO ( SCc_SHK3Dr, SCc_CHORS, SCc_ANS, SCc_TRPS3, BCc_BTS5 )	27.9412	99.9139	64.666	93.2524	71.3895
KO ( SCc_SHK3Dr, SCc_TRPS3, BCc_DHFS )	27.9412	99.8911	71.51	71.3012	100
KO ( BCc_SHK3Dr, BCc_CHORS, BCc_ANS, BCc_TRPS3, SCc_AOXSr2 )	27.9412	99.6053	64.421	73.149	66.0877
KO ( BCc_SHK3Dr, BCc_CHORS, BCc_ANS, BCc_TRPS3, SCc_BTS5 )	27.9412	99.6053	64.421	73.149	100
KO ( BCc_SHK3Dr, BCc_CHORS, BCc_ANS, SCc_AOXSr2, SCc_BTS5 )	27.9412	99.6053	64.421	73.149	54.3739
KO ( BCc_SHK3Dr, BCc_TRPS3, SCc_AOXSr2, SCc_BTS5 )	27.9412	99.6053	65.7951	79.4608	54.3739
KO ( BCc_SHK3Dr, BCc_CHORS, BCc_ANS, BCc_TRPS3, BCc_AOXSr2 )	27.9412	99.605	64.421	73.149	85.8671
KO ( BCc_SHK3Dr, BCc_CHORS, BCc_ANS, BCc_AOXSr2, SCc_BTS5 )	27.9412	99.605	64.421	73.149	85.8671
KO ( BCc_SHK3Dr, BCc_TRPS3, BCc_AOXSr2, SCc_BTS5 )	27.9412	99.605	65.7951	79.4608	85.8671
KO ( BCc_SHK3Dr, BCc_CHORS, BCc_ANS, BCc_TRPS3, BCc_BTS5 )	27.9412	99.6048	64.421	73.149	71.3895
KO ( BCc_SHK3Dr, BCc_TRPS3, SCc_AOXSr2, BCc_BTS5 )	27.9412	99.6048	65.7951	79.4608	65.4447
KO ( BCc_SHK3Dr, BCc_CHORS, BCc_ANS, SCc_AOXSr2, BCc_BTS5 )	27.9412	99.6048	64.421	73.149	64.5949
KO ( BCc_SHK3Dr, BCc_CHORS, BCc_ANS, BCc_AOXSr2, BCc_BTS5 )	27.9412	99.6046	64.421	73.149	58.6592
KO ( BCc_SHK3Dr, BCc_TRPS3, BCc_AOXSr2, BCc_BTS5 )	27.9412	99.6046	65.7951	79.4608	58.6592
KO ( BCc_SHK3Dr, BCc_CHORS, BCc_ANS, SCc_DHFS )	27.9412	99.6044	64.421	73.149	100
KO ( BCc_SHK3Dr, BCc_TRPS3, SCc_DHFS )	27.9412	99.6044	65.7951	79.4608	100
KO ( BCc_SHK3Dr, SCc_DHFS, SCc_AOXSr2 )	27.9412	99.6044	75.922	79.4608	66.0877
KO ( BCc_SHK3Dr, SCc_DHFS, SCc_BTS5 )	27.9412	99.6044	75.922	79.4608	100
KO ( BCc_SHK3Dr, SCc_DHFS, BCc_AOXSr2 )	27.9412	99.6041	75.922	79.4608	85.8671
KO ( BCc_SHK3Dr, SCc_DHFS, BCc_BTS5 )	27.9412	99.6039	75.922	79.4608	71.3895
KO ( BCc_SHK3Dr, BCc_CHORS, SCc_ANS, SCc_AOXSr2, SCc_BTS5 )	27.9412	99.6024	75.163	73.149	54.3739
KO ( BCc_SHK3Dr, BCc_CHORS, SCc_ANS, BCc_AOXSr2, SCc_BTS5 )	27.9412	99.6021	75.163	73.149	85.8671
KO ( BCc_SHK3Dr, BCc_CHORS, SCc_ANS, SCc_AOXSr2, BCc_BTS5 )	27.9412	99.602	75.163	73.149	64.5949
KO ( BCc_SHK3Dr, BCc_CHORS, SCc_ANS, BCc_AOXSr2, BCc_BTS5 )	27.9412	99.6018	75.163	73.149	58.6592
KO ( BCc_SHK3Dr, BCc_CHORS, SCc_ANS, SCc_DHFS )	27.9412	99.6015	75.163	73.149	100
KO ( BCc_SHK3Dr, BCc_CHORS, SCc_ANS, BCc_TRPS3, SCc_AOXSr2 )	27.9412	99.5922	60.7398	73.149	66.0877
KO ( BCc_SHK3Dr, BCc_CHORS, SCc_ANS, BCc_TRPS3, SCc_BTS5 )	27.9412	99.5922	60.7398	73.149	100
KO ( BCc_SHK3Dr, BCc_CHORS, SCc_ANS, BCc_TRPS3, BCc_AOXSr2 )	27.9412	99.5919	60.7398	73.149	85.8671
KO ( BCc_SHK3Dr, BCc_CHORS, SCc_ANS, BCc_TRPS3, BCc_BTS5 )	27.9412	99.5917	60.7398	73.149	71.3895
KO ( BCc_SHK3Dr, BCc_TRPS3, BCc_DHFS )	27.9412	99.5878	65.7951	63.8108	100
KO ( BCc_SHK3Dr, BCc_CHORS, BCc_ANS, BCc_DHFS )	27.9412	99.5878	64.421	63.8108	100
KO ( BCc_SHK3Dr, BCc_DHFS, SCc_AOXSr2 )	27.9412	99.5878	75.922	63.8108	66.0877
KO ( BCc_SHK3Dr, BCc_DHFS, SCc_BTS5 )	27.9412	99.5878	75.922	63.8108	100
KO ( BCc_SHK3Dr, BCc_DHFS, BCc_AOXSr2 )	27.9412	99.5875	75.922	63.8108	85.8671
KO ( BCc_SHK3Dr, BCc_DHFS, BCc_BTS5 )	27.9412	99.5874	75.922	63.8108	71.3895
KO ( BCc_SHK3Dr, BCc_CHORS, SCc_ANS, BCc_DHFS )	27.9412	99.585	75.163	63.8108	100
KO ( BCc_SHK3Dr, BCc_CHORS, SCc_ANS, SCc_TRPS3, SCc_AOXSr2 )	27.9412	99.5182	75.163	73.149	66.0877
KO ( BCc_SHK3Dr, BCc_CHORS, SCc_ANS, SCc_TRPS3, SCc_BTS5 )	27.9412	99.5182	75.163	73.149	100
KO ( BCc_SHK3Dr, SCc_TRPS3, SCc_AOXSr2, SCc_BTS5 )	27.9412	99.5182	75.922	79.4608	54.3739
KO ( BCc_SHK3Dr, BCc_CHORS, SCc_ANS, SCc_TRPS3, BCc_AOXSr2 )	27.9412	99.5179	75.163	73.149	85.8671
KO ( BCc_SHK3Dr, SCc_TRPS3, BCc_AOXSr2, SCc_BTS5 )	27.9412	99.5179	75.922	79.4608	85.8671
KO ( BCc_SHK3Dr, BCc_CHORS, SCc_ANS, SCc_TRPS3, BCc_BTS5 )	27.9412	99.5178	75.163	73.149	71.3895
KO ( BCc_SHK3Dr, SCc_TRPS3, SCc_AOXSr2, BCc_BTS5 )	27.9412	99.5178	75.922	79.4608	65.4447
KO ( BCc_SHK3Dr, SCc_TRPS3, BCc_AOXSr2, BCc_BTS5 )	27.9412	99.5176	75.922	79.4608	58.6592
KO ( BCc_SHK3Dr, SCc_TRPS3, SCc_DHFS )	27.9412	99.5173	75.922	79.4608	100
KO ( BCc_SHK3Dr, SCc_TRPS3, BCc_DHFS )	27.9412	99.5008	75.922	63.8108	100
KO ( SCc_SHK3Dr, SCc_CHORS, BCc_ANS, SCc_AOXSr2, SCc_BTS5 )	27.9412	99.4545	68.443	93.2524	54.3739
KO ( SCc_SHK3Dr, SCc_CHORS, BCc_ANS, SCc_DHFS )	27.9412	99.4545	68.443	93.2524	100
KO ( SCc_SHK3Dr, SCc_CHORS, BCc_ANS, BCc_TRPS3, SCc_AOXSr2 )	27.9412	99.4545	68.443	93.2524	66.0877
KO ( SCc_SHK3Dr, SCc_CHORS, BCc_ANS, BCc_TRPS3, SCc_BTS5 )	27.9412	99.4545	68.443	93.2524	100
KO ( SCc_SHK3Dr, SCc_CHORS, BCc_ANS, BCc_TRPS3, BCc_AOXSr2 )	27.9412	99.4542	68.443	93.2524	85.8671
KO ( SCc_SHK3Dr, SCc_CHORS, BCc_ANS, BCc_AOXSr2, SCc_BTS5 )	27.9412	99.4542	68.443	93.2524	85.8671
KO ( SCc_SHK3Dr, SCc_CHORS, BCc_ANS, BCc_TRPS3, BCc_BTS5 )	27.9412	99.4541	68.443	93.2524	71.3895
KO ( SCc_SHK3Dr, SCc_CHORS, BCc_ANS, SCc_AOXSr2, BCc_BTS5 )	27.9412	99.4541	68.443	93.2524	66.0396
KO ( SCc_SHK3Dr, SCc_CHORS, BCc_ANS, BCc_AOXSr2, BCc_BTS5 )	27.9412	99.4539	68.443	93.2524	58.6592
KO ( SCc_SHK3Dr, SCc_CHORS, BCc_ANS, BCc_DHFS )	27.9412	99.4189	68.443	63.2246	100
KO ( BCc_SHK3Dr, BCc_CHORS, BCc_ANS, SCc_TRPS3, SCc_AOXSr2 )	27.9412	99.151	59.6414	73.149	66.0877
KO ( BCc_SHK3Dr, BCc_CHORS, BCc_ANS, SCc_TRPS3, SCc_BTS5 )	27.9412	99.151	59.6414	73.149	100
KO ( BCc_SHK3Dr, BCc_CHORS, BCc_ANS, SCc_TRPS3, BCc_AOXSr2 )	27.9412	99.1507	58.8917	73.149	85.8671
KO ( BCc_SHK3Dr, BCc_CHORS, BCc_ANS, SCc_TRPS3, BCc_BTS5 )	27.9412	99.1506	58.8917	73.149	71.3895
KO ( SCc_SHK3Dr, SCc_CHORS, BCc_ANS, SCc_TRPS3, SCc_AOXSr2 )	27.9412	99.0017	55.5082	93.2524	66.0877
KO ( SCc_SHK3Dr, SCc_CHORS, BCc_ANS, SCc_TRPS3, SCc_BTS5 )	27.9412	99.0017	55.5082	93.2524	100
KO ( SCc_SHK3Dr, SCc_CHORS, BCc_ANS, SCc_TRPS3, BCc_AOXSr2 )	27.9412	99.0014	55.5082	93.2524	85.8671
KO ( SCc_SHK3Dr, SCc_CHORS, BCc_ANS, SCc_TRPS3, BCc_BTS5 )	27.9412	99.0012	55.5082	93.2524	71.3895
KO ( SCc_SHK3Dr, BCc_CHORS, BCc_ANS, BCc_TRPS3, SCc_AOXSr2 )	27.9412	98.3732	75.7557	87.7466	66.0877
KO ( SCc_SHK3Dr, BCc_CHORS, BCc_ANS, BCc_TRPS3, SCc_BTS5 )	27.9412	98.3732	75.7557	87.7466	100
KO ( SCc_SHK3Dr, BCc_CHORS, BCc_ANS, SCc_AOXSr2, SCc_BTS5 )	27.9412	98.3732	75.9926	87.7466	54.3739
KO ( SCc_SHK3Dr, BCc_CHORS, BCc_ANS, BCc_AOXSr2, SCc_BTS5 )	27.9412	98.373	75.9926	87.7466	85.8671
KO ( SCc_SHK3Dr, BCc_CHORS, BCc_ANS, BCc_TRPS3, BCc_AOXSr2 )	27.9412	98.373	75.7557	87.7466	85.8671
KO ( SCc_SHK3Dr, BCc_CHORS, BCc_ANS, BCc_TRPS3, BCc_BTS5 )	27.9412	98.3728	75.7557	87.7466	71.3895
KO ( SCc_SHK3Dr, BCc_CHORS, BCc_ANS, SCc_AOXSr2, BCc_BTS5 )	27.9412	98.3728	75.9926	87.7466	64.4003
KO ( SCc_SHK3Dr, BCc_CHORS, BCc_ANS, BCc_AOXSr2, BCc_BTS5 )	27.9412	98.3726	75.9926	87.7466	58.6592
KO ( SCc_SHK3Dr, BCc_CHORS, BCc_ANS, SCc_DHFS )	27.9412	98.3724	75.9926	86.2162	100
KO ( SCc_SHK3Dr, BCc_CHORS, SCc_ANS, SCc_AOXSr2, SCc_BTS5 )	27.9412	98.3705	82.9894	87.7466	54.3739
KO ( SCc_SHK3Dr, BCc_CHORS, SCc_ANS, BCc_AOXSr2, SCc_BTS5 )	27.9412	98.3702	82.9894	87.7466	85.8671
KO ( SCc_SHK3Dr, BCc_CHORS, SCc_ANS, SCc_AOXSr2, BCc_BTS5 )	27.9412	98.3701	82.9894	87.7466	64.4003
KO ( SCc_SHK3Dr, BCc_CHORS, SCc_ANS, BCc_AOXSr2, BCc_BTS5 )	27.9412	98.3699	82.9894	87.7466	58.6592
KO ( SCc_SHK3Dr, BCc_CHORS, SCc_ANS, SCc_DHFS )	27.9412	98.3696	82.9894	86.2162	100
KO ( SCc_SHK3Dr, BCc_CHORS, SCc_ANS, BCc_TRPS3, SCc_AOXSr2 )	27.9412	98.3605	75.2806	87.7466	66.0877
KO ( SCc_SHK3Dr, BCc_CHORS, SCc_ANS, BCc_TRPS3, SCc_BTS5 )	27.9412	98.3605	75.2806	87.7466	100
KO ( SCc_SHK3Dr, BCc_CHORS, SCc_ANS, BCc_TRPS3, BCc_AOXSr2 )	27.9412	98.3602	75.2806	87.7466	85.8671
KO ( SCc_SHK3Dr, BCc_CHORS, SCc_ANS, BCc_TRPS3, BCc_BTS5 )	27.9412	98.3601	75.2806	87.7466	71.3895
KO ( SCc_SHK3Dr, BCc_CHORS, BCc_ANS, BCc_DHFS )	27.9412	98.3562	75.9926	71.3012	100
KO ( SCc_SHK3Dr, BCc_CHORS, SCc_ANS, BCc_DHFS )	27.9412	98.3535	82.9894	71.3012	100
KO ( SCc_SHK3Dr, BCc_CHORS, SCc_ANS, SCc_TRPS3, SCc_AOXSr2 )	27.9412	98.2883	63.3807	87.7466	66.0877
KO ( SCc_SHK3Dr, BCc_CHORS, SCc_ANS, SCc_TRPS3, SCc_BTS5 )	27.9412	98.2883	63.3807	87.7466	100
KO ( SCc_SHK3Dr, BCc_CHORS, SCc_ANS, SCc_TRPS3, BCc_AOXSr2 )	27.9412	98.2881	63.3807	87.7466	85.8671
KO ( SCc_SHK3Dr, BCc_CHORS, SCc_ANS, SCc_TRPS3, BCc_BTS5 )	27.9412	98.2879	63.3807	87.7466	71.3895
KO ( SCc_SHK3Dr, BCc_CHORS, BCc_ANS, SCc_TRPS3, SCc_AOXSr2 )	27.9412	97.9301	68.0949	87.7466	66.0877
KO ( SCc_SHK3Dr, BCc_CHORS, BCc_ANS, SCc_TRPS3, SCc_BTS5 )	27.9412	97.9301	68.0949	87.7466	100
KO ( SCc_SHK3Dr, BCc_CHORS, BCc_ANS, SCc_TRPS3, BCc_AOXSr2 )	27.9412	97.9299	68.0949	87.7466	85.8671
KO ( SCc_SHK3Dr, BCc_CHORS, BCc_ANS, SCc_TRPS3, BCc_BTS5 )	27.9412	97.9297	68.0949	87.7466	71.3895
KO ( BCc_SHK3Dr, SCc_CHORS, SCc_ANS, SCc_AOXSr2, SCc_BTS5 )	27.9412	97.8704	74.7483	79.4608	54.3739
KO ( BCc_SHK3Dr, SCc_CHORS, SCc_ANS, SCc_DHFS )	27.9412	97.8704	74.7483	79.4608	100
KO ( BCc_SHK3Dr, SCc_CHORS, SCc_ANS, BCc_AOXSr2, SCc_BTS5 )	27.9412	97.8701	74.7483	79.4608	85.8671
KO ( BCc_SHK3Dr, SCc_CHORS, SCc_ANS, SCc_AOXSr2, BCc_BTS5 )	27.9412	97.87	74.7483	79.4608	65.4447
KO ( BCc_SHK3Dr, SCc_CHORS, SCc_ANS, BCc_AOXSr2, BCc_BTS5 )	27.9412	97.8698	74.7483	79.4608	58.6592
KO ( BCc_SHK3Dr, SCc_CHORS, SCc_ANS, BCc_TRPS3, SCc_AOXSr2 )	27.9412	97.8605	65.7951	79.4608	66.0877
KO ( BCc_SHK3Dr, SCc_CHORS, SCc_ANS, BCc_TRPS3, SCc_BTS5 )	27.9412	97.8605	65.7951	79.4608	100
KO ( BCc_SHK3Dr, SCc_CHORS, SCc_ANS, BCc_TRPS3, BCc_AOXSr2 )	27.9412	97.8602	65.7951	79.4608	85.8671
KO ( BCc_SHK3Dr, SCc_CHORS, SCc_ANS, BCc_TRPS3, BCc_BTS5 )	27.9412	97.8601	65.7951	79.4608	71.3895
KO ( BCc_SHK3Dr, SCc_CHORS, SCc_ANS, BCc_DHFS )	27.9412	97.8359	74.7483	53.3624	100
KO ( BCc_SHK3Dr, SCc_CHORS, SCc_ANS, SCc_TRPS3, SCc_AOXSr2 )	27.9412	97.7891	69.3226	79.4608	66.0877
KO ( BCc_SHK3Dr, SCc_CHORS, SCc_ANS, SCc_TRPS3, SCc_BTS5 )	27.9412	97.7891	69.3226	79.4608	100
KO ( BCc_SHK3Dr, SCc_CHORS, SCc_ANS, SCc_TRPS3, BCc_AOXSr2 )	27.9412	97.7888	69.3226	79.4608	85.8671
KO ( BCc_SHK3Dr, SCc_CHORS, SCc_ANS, SCc_TRPS3, BCc_BTS5 )	27.9412	97.7887	69.3226	79.4608	71.3895
KO ( BCc_SHK3Dr, SCc_CHORS, BCc_ANS, BCc_TRPS3, SCc_AOXSr2 )	27.9412	97.3486	50.3734	79.4608	66.0877
KO ( BCc_SHK3Dr, SCc_CHORS, BCc_ANS, BCc_TRPS3, SCc_BTS5 )	27.9412	97.3486	50.3734	79.4608	100
KO ( BCc_SHK3Dr, SCc_CHORS, BCc_ANS, SCc_AOXSr2, SCc_BTS5 )	27.9412	97.3486	50.3734	79.4608	54.3739
KO ( BCc_SHK3Dr, SCc_CHORS, BCc_ANS, SCc_DHFS )	27.9412	97.3486	50.3734	79.4608	100
KO ( BCc_SHK3Dr, SCc_CHORS, BCc_ANS, BCc_AOXSr2, SCc_BTS5 )	27.9412	97.3484	50.3734	79.4608	85.8671
KO ( BCc_SHK3Dr, SCc_CHORS, BCc_ANS, BCc_TRPS3, BCc_AOXSr2 )	27.9412	97.3484	50.3734	79.4608	85.8671
KO ( BCc_SHK3Dr, SCc_CHORS, BCc_ANS, SCc_AOXSr2, BCc_BTS5 )	27.9412	97.3482	50.3734	79.4608	65.4447
KO ( BCc_SHK3Dr, SCc_CHORS, BCc_ANS, BCc_TRPS3, BCc_BTS5 )	27.9412	97.3482	50.3734	79.4608	71.3895
KO ( BCc_SHK3Dr, SCc_CHORS, BCc_ANS, BCc_AOXSr2, BCc_BTS5 )	27.9412	97.348	50.3734	79.4608	58.6592
KO ( BCc_SHK3Dr, SCc_CHORS, BCc_ANS, BCc_DHFS )	27.9412	97.3145	50.3734	53.3624	100
KO ( BCc_SHK3Dr, SCc_CHORS, BCc_ANS, SCc_TRPS3, SCc_AOXSr2 )	27.9412	96.9147	47.9038	79.4608	66.0877
KO ( BCc_SHK3Dr, SCc_CHORS, BCc_ANS, SCc_TRPS3, SCc_BTS5 )	27.9412	96.9147	47.9038	79.4608	100
KO ( BCc_SHK3Dr, SCc_CHORS, BCc_ANS, SCc_TRPS3, BCc_AOXSr2 )	27.9412	96.9144	47.9038	79.4608	85.8671
KO ( BCc_SHK3Dr, SCc_CHORS, BCc_ANS, SCc_TRPS3, BCc_BTS5 )	27.9412	96.9143	47.9038	79.4608	71.3895
KO ( SCc_CHORS, SCc_DHFS, SCc_AOXSr2 )	26.4706	99.9992	100	93.2524	66.0877
KO ( SCc_CHORS, SCc_DHFS, SCc_BTS5 )	26.4706	99.9992	100	93.2524	100
KO ( SCc_CHORS, SCc_DHFS, BCc_AOXSr2 )	26.4706	99.9989	100	93.2524	85.8671
KO ( SCc_CHORS, SCc_DHFS, BCc_BTS5 )	26.4706	99.9987	100	93.2524	71.3895
KO ( SCc_CHORS, BCc_TRPS3, SCc_AOXSr2, SCc_BTS5 )	26.4706	99.9888	99.8041	93.2524	54.3739
KO ( SCc_CHORS, BCc_TRPS3, SCc_DHFS )	26.4706	99.9888	99.8041	93.2524	100
KO ( SCc_CHORS, BCc_TRPS3, BCc_AOXSr2, SCc_BTS5 )	26.4706	99.9885	99.8041	93.2524	85.8671
KO ( SCc_CHORS, BCc_TRPS3, SCc_AOXSr2, BCc_BTS5 )	26.4706	99.9884	99.8041	93.2524	66.0396
KO ( SCc_CHORS, BCc_TRPS3, BCc_AOXSr2, BCc_BTS5 )	26.4706	99.9882	99.8041	93.2524	58.6592
KO ( SCc_CHORS, BCc_DHFS, SCc_AOXSr2 )	26.4706	99.9631	100	63.2246	66.0877
KO ( SCc_CHORS, BCc_DHFS, SCc_BTS5 )	26.4706	99.9631	100	63.2246	100
KO ( SCc_CHORS, BCc_DHFS, BCc_AOXSr2 )	26.4706	99.9628	100	63.2246	85.8671
KO ( SCc_CHORS, BCc_DHFS, BCc_BTS5 )	26.4706	99.9627	100	63.2246	71.3895
KO ( SCc_CHORS, BCc_TRPS3, BCc_DHFS )	26.4706	99.9528	99.8041	63.2246	100
KO ( SCc_CHORS, SCc_TRPS3, SCc_AOXSr2, SCc_BTS5 )	26.4706	99.9143	69.3226	93.2524	54.3739
KO ( SCc_CHORS, SCc_TRPS3, SCc_DHFS )	26.4706	99.9143	69.3226	93.2524	100
KO ( SCc_CHORS, SCc_TRPS3, BCc_AOXSr2, SCc_BTS5 )	26.4706	99.914	69.3226	93.2524	85.8671
KO ( SCc_CHORS, SCc_TRPS3, SCc_AOXSr2, BCc_BTS5 )	26.4706	99.9139	69.3226	93.2524	66.0396
KO ( SCc_CHORS, SCc_TRPS3, BCc_AOXSr2, BCc_BTS5 )	26.4706	99.9136	69.3226	93.2524	58.6592
KO ( SCc_CHORS, SCc_TRPS3, BCc_DHFS )	26.4706	99.8783	69.3226	63.2246	100
KO ( BCc_CHORS, BCc_TRPS3, SCc_AOXSr2, SCc_BTS5 )	26.4706	99.6053	75.7557	87.7466	54.3739
KO ( BCc_CHORS, BCc_TRPS3, BCc_AOXSr2, SCc_BTS5 )	26.4706	99.605	75.7557	87.7466	85.8671
KO ( BCc_CHORS, BCc_TRPS3, SCc_AOXSr2, BCc_BTS5 )	26.4706	99.6048	75.7557	87.7466	64.5949
KO ( BCc_CHORS, BCc_TRPS3, BCc_AOXSr2, BCc_BTS5 )	26.4706	99.6046	75.7557	87.7466	58.6592
KO ( BCc_CHORS, BCc_TRPS3, SCc_DHFS )	26.4706	99.6044	75.7557	86.2162	100
KO ( BCc_CHORS, SCc_DHFS, SCc_AOXSr2 )	26.4706	99.6044	86.3667	86.2162	66.0877
KO ( BCc_CHORS, SCc_DHFS, SCc_BTS5 )	26.4706	99.6044	86.3667	86.2162	100
KO ( BCc_CHORS, SCc_DHFS, BCc_AOXSr2 )	26.4706	99.6041	86.3667	86.2162	85.8671
KO ( BCc_CHORS, SCc_DHFS, BCc_BTS5 )	26.4706	99.6039	86.3667	86.2162	71.3895
KO ( BCc_CHORS, BCc_TRPS3, BCc_DHFS )	26.4706	99.5878	75.7557	71.3012	100
KO ( BCc_CHORS, BCc_DHFS, SCc_AOXSr2 )	26.4706	99.5878	86.3667	71.3012	66.0877
KO ( BCc_CHORS, BCc_DHFS, SCc_BTS5 )	26.4706	99.5878	86.3667	71.3012	100
KO ( BCc_CHORS, BCc_DHFS, BCc_AOXSr2 )	26.4706	99.5875	86.3667	71.3012	85.8671
KO ( BCc_CHORS, BCc_DHFS, BCc_BTS5 )	26.4706	99.5874	86.3667	71.3012	71.3895
KO ( BCc_CHORS, SCc_TRPS3, SCc_AOXSr2, SCc_BTS5 )	26.4706	99.5182	77.8564	87.7466	54.3739
KO ( BCc_CHORS, SCc_TRPS3, BCc_AOXSr2, SCc_BTS5 )	26.4706	99.5179	77.8564	87.7466	85.8671
KO ( BCc_CHORS, SCc_TRPS3, SCc_AOXSr2, BCc_BTS5 )	26.4706	99.5178	77.8564	87.7466	64.5949
KO ( BCc_CHORS, SCc_TRPS3, BCc_AOXSr2, BCc_BTS5 )	26.4706	99.5176	77.8564	87.7466	58.6592
KO ( BCc_CHORS, SCc_TRPS3, SCc_DHFS )	26.4706	99.5173	77.8564	86.2162	100
KO ( BCc_CHORS, SCc_TRPS3, BCc_DHFS )	26.4706	99.5008	77.8564	71.3012	100
KO ( SCc_ANS, SCc_DHFS, SCc_AOXSr2 )	25	99.9992	100	95.6308	66.0877
KO ( SCc_ANS, SCc_DHFS, SCc_BTS5 )	25	99.9992	100	95.6308	100
KO ( SCc_SHK3Dr, SCc_CHORS, SCc_AOXSr2, SCc_BTS5 )	25	99.9992	100	93.2524	54.3739
KO ( SCc_SHK3Dr, SCc_CHORS, SCc_DHFS )	25	99.9992	100	93.2524	100
KO ( SCc_ANS, SCc_DHFS, BCc_AOXSr2 )	25	99.9989	100	95.6308	85.8671
KO ( SCc_SHK3Dr, SCc_CHORS, BCc_AOXSr2, SCc_BTS5 )	25	99.9989	100	93.2524	85.8671
KO ( SCc_ANS, SCc_DHFS, BCc_BTS5 )	25	99.9987	100	95.6308	71.3895
KO ( SCc_SHK3Dr, SCc_CHORS, SCc_AOXSr2, BCc_BTS5 )	25	99.9987	100	93.2524	66.0396
KO ( SCc_SHK3Dr, SCc_CHORS, BCc_AOXSr2, BCc_BTS5 )	25	99.9985	100	93.2524	58.6592
KO ( SCc_ANS, BCc_TRPS3, SCc_AOXSr2, SCc_BTS5 )	25	99.9896	99.8041	100	54.3739
KO ( SCc_ANS, BCc_TRPS3, BCc_AOXSr2, SCc_BTS5 )	25	99.9894	99.8041	100	85.8671
KO ( SCc_ANS, BCc_TRPS3, SCc_AOXSr2, BCc_BTS5 )	25	99.9892	99.8041	100	66.0396
KO ( SCc_ANS, BCc_TRPS3, BCc_AOXSr2, BCc_BTS5 )	25	99.989	99.8041	100	58.6592
KO ( SCc_ANS, BCc_TRPS3, SCc_DHFS )	25	99.9888	99.8041	95.6308	100
KO ( SCc_SHK3Dr, SCc_CHORS, BCc_TRPS3, SCc_AOXSr2 )	25	99.9888	99.8041	93.2524	66.0877
KO ( SCc_SHK3Dr, SCc_CHORS, BCc_TRPS3, SCc_BTS5 )	25	99.9888	99.8041	93.2524	100
KO ( SCc_SHK3Dr, SCc_CHORS, BCc_TRPS3, BCc_AOXSr2 )	25	99.9885	99.8041	93.2524	85.8671
KO ( SCc_SHK3Dr, SCc_CHORS, BCc_TRPS3, BCc_BTS5 )	25	99.9884	99.8041	93.2524	71.3895
KO ( SCc_ANS, BCc_DHFS, SCc_AOXSr2 )	25	99.9809	100	71.3012	66.0877
KO ( SCc_ANS, BCc_DHFS, SCc_BTS5 )	25	99.9809	100	71.3012	100
KO ( SCc_ANS, BCc_DHFS, BCc_AOXSr2 )	25	99.9806	100	71.3012	85.8671
KO ( SCc_ANS, BCc_DHFS, BCc_BTS5 )	25	99.9805	100	71.3012	71.3895
KO ( SCc_ANS, BCc_TRPS3, BCc_DHFS )	25	99.9706	99.8041	71.3012	100
KO ( SCc_SHK3Dr, SCc_CHORS, BCc_DHFS )	25	99.9631	100	63.2246	100
KO ( BCc_ANS, BCc_TRPS3, SCc_AOXSr2, SCc_BTS5 )	25	99.958	75.7557	100	54.3739
KO ( BCc_ANS, BCc_TRPS3, BCc_AOXSr2, SCc_BTS5 )	25	99.9578	75.7557	100	85.8671
KO ( BCc_ANS, BCc_TRPS3, SCc_AOXSr2, BCc_BTS5 )	25	99.9576	75.7557	100	66.0396
KO ( BCc_ANS, BCc_TRPS3, BCc_AOXSr2, BCc_BTS5 )	25	99.9574	75.7557	100	58.6592
KO ( BCc_ANS, BCc_TRPS3, SCc_DHFS )	25	99.9572	75.7557	95.6308	100
KO ( BCc_ANS, SCc_DHFS, SCc_AOXSr2 )	25	99.9572	75.9926	95.6308	66.0877
KO ( BCc_ANS, SCc_DHFS, SCc_BTS5 )	25	99.9572	75.9926	95.6308	100
KO ( BCc_ANS, SCc_DHFS, BCc_AOXSr2 )	25	99.9569	75.9926	95.6308	85.8671
KO ( BCc_ANS, SCc_DHFS, BCc_BTS5 )	25	99.9568	75.9926	95.6308	71.3895
KO ( BCc_ANS, BCc_DHFS, SCc_AOXSr2 )	25	99.939	75.9926	71.3012	66.0877
KO ( BCc_ANS, BCc_DHFS, SCc_BTS5 )	25	99.939	75.9926	71.3012	100
KO ( BCc_ANS, BCc_TRPS3, BCc_DHFS )	25	99.939	75.7557	71.3012	100
KO ( BCc_ANS, BCc_DHFS, BCc_AOXSr2 )	25	99.9387	75.9926	71.3012	85.8671
KO ( BCc_ANS, BCc_DHFS, BCc_BTS5 )	25	99.9385	75.9926	71.3012	71.3895
KO ( SCc_ANS, SCc_TRPS3, SCc_AOXSr2, SCc_BTS5 )	25	99.9151	79.562	100	54.3739
KO ( SCc_ANS, SCc_TRPS3, BCc_AOXSr2, SCc_BTS5 )	25	99.9148	79.562	100	85.8671
KO ( SCc_ANS, SCc_TRPS3, SCc_AOXSr2, BCc_BTS5 )	25	99.9147	79.562	100	66.0396
KO ( SCc_ANS, SCc_TRPS3, BCc_AOXSr2, BCc_BTS5 )	25	99.9145	79.562	100	58.6592
KO ( SCc_SHK3Dr, SCc_CHORS, SCc_TRPS3, SCc_AOXSr2 )	25	99.9143	64.666	93.2524	66.0877
KO ( SCc_SHK3Dr, SCc_CHORS, SCc_TRPS3, SCc_BTS5 )	25	99.9143	64.666	93.2524	100
KO ( SCc_ANS, SCc_TRPS3, SCc_DHFS )	25	99.9143	79.562	95.6308	100
KO ( SCc_SHK3Dr, SCc_CHORS, SCc_TRPS3, BCc_AOXSr2 )	25	99.914	64.666	93.2524	85.8671
KO ( SCc_SHK3Dr, SCc_CHORS, SCc_TRPS3, BCc_BTS5 )	25	99.9139	64.666	93.2524	71.3895
KO ( SCc_ANS, SCc_TRPS3, BCc_DHFS )	25	99.896	79.562	71.3012	100
KO ( BCc_SHK3Dr, BCc_CHORS, SCc_AOXSr2, SCc_BTS5 )	25	99.6053	75.163	73.149	54.3739
KO ( BCc_SHK3Dr, BCc_CHORS, BCc_TRPS3, SCc_AOXSr2 )	25	99.6053	64.421	73.149	66.0877
KO ( BCc_SHK3Dr, BCc_CHORS, BCc_TRPS3, SCc_BTS5 )	25	99.6053	64.421	73.149	100
KO ( BCc_SHK3Dr, BCc_CHORS, BCc_AOXSr2, SCc_BTS5 )	25	99.605	75.163	73.149	85.8671
KO ( BCc_SHK3Dr, BCc_CHORS, BCc_TRPS3, BCc_AOXSr2 )	25	99.605	64.421	73.149	85.8671
KO ( BCc_SHK3Dr, BCc_CHORS, SCc_AOXSr2, BCc_BTS5 )	25	99.6048	75.163	73.149	64.5949
KO ( BCc_SHK3Dr, BCc_CHORS, BCc_TRPS3, BCc_BTS5 )	25	99.6048	64.421	73.149	71.3895
KO ( BCc_SHK3Dr, BCc_CHORS, BCc_AOXSr2, BCc_BTS5 )	25	99.6046	75.163	73.149	58.6592
KO ( BCc_SHK3Dr, BCc_CHORS, SCc_DHFS )	25	99.6044	75.163	73.149	100
KO ( BCc_SHK3Dr, BCc_CHORS, BCc_DHFS )	25	99.5878	75.163	63.8108	100
KO ( BCc_SHK3Dr, BCc_CHORS, SCc_TRPS3, SCc_AOXSr2 )	25	99.5182	75.163	73.149	66.0877
KO ( BCc_SHK3Dr, BCc_CHORS, SCc_TRPS3, SCc_BTS5 )	25	99.5182	75.163	73.149	100
KO ( BCc_SHK3Dr, BCc_CHORS, SCc_TRPS3, BCc_AOXSr2 )	25	99.5179	75.163	73.149	85.8671
KO ( BCc_SHK3Dr, BCc_CHORS, SCc_TRPS3, BCc_BTS5 )	25	99.5178	75.163	73.149	71.3895
KO ( BCc_ANS, SCc_TRPS3, SCc_AOXSr2, SCc_BTS5 )	25	99.5006	69.0952	100	54.3739
KO ( BCc_ANS, SCc_TRPS3, BCc_AOXSr2, SCc_BTS5 )	25	99.5003	69.0952	100	85.8671
KO ( BCc_ANS, SCc_TRPS3, SCc_AOXSr2, BCc_BTS5 )	25	99.5002	69.0952	100	66.0396
KO ( BCc_ANS, SCc_TRPS3, BCc_AOXSr2, BCc_BTS5 )	25	99.5	69.0952	100	58.6592
KO ( BCc_ANS, SCc_TRPS3, SCc_DHFS )	25	99.4998	69.0952	95.6308	100
KO ( BCc_ANS, SCc_TRPS3, BCc_DHFS )	25	99.4817	69.0952	71.3012	100
KO ( SCc_SHK3Dr, BCc_CHORS, SCc_AOXSr2, SCc_BTS5 )	25	98.3732	86.3667	87.7466	54.3739
KO ( SCc_SHK3Dr, BCc_CHORS, BCc_TRPS3, SCc_AOXSr2 )	25	98.3732	75.7557	87.7466	66.0877
KO ( SCc_SHK3Dr, BCc_CHORS, BCc_TRPS3, SCc_BTS5 )	25	98.3732	75.7557	87.7466	100
KO ( SCc_SHK3Dr, BCc_CHORS, BCc_TRPS3, BCc_AOXSr2 )	25	98.373	75.7557	87.7466	85.8671
KO ( SCc_SHK3Dr, BCc_CHORS, BCc_AOXSr2, SCc_BTS5 )	25	98.373	86.3667	87.7466	85.8671
KO ( SCc_SHK3Dr, BCc_CHORS, SCc_AOXSr2, BCc_BTS5 )	25	98.3728	86.3667	87.7466	64.4003
KO ( SCc_SHK3Dr, BCc_CHORS, BCc_TRPS3, BCc_BTS5 )	25	98.3728	75.7557	87.7466	71.3895
KO ( SCc_SHK3Dr, BCc_CHORS, BCc_AOXSr2, BCc_BTS5 )	25	98.3726	86.3667	87.7466	58.6592
KO ( SCc_SHK3Dr, BCc_CHORS, SCc_DHFS )	25	98.3724	86.3667	86.2162	100
KO ( SCc_SHK3Dr, BCc_CHORS, BCc_DHFS )	25	98.3562	86.3667	71.3012	100
KO ( SCc_SHK3Dr, BCc_CHORS, SCc_TRPS3, SCc_AOXSr2 )	25	98.2883	70.5483	87.7466	66.0877
KO ( SCc_SHK3Dr, BCc_CHORS, SCc_TRPS3, SCc_BTS5 )	25	98.2883	70.5483	87.7466	100
KO ( SCc_SHK3Dr, BCc_CHORS, SCc_TRPS3, BCc_AOXSr2 )	25	98.2881	70.5483	87.7466	85.8671
KO ( SCc_SHK3Dr, BCc_CHORS, SCc_TRPS3, BCc_BTS5 )	25	98.2879	70.5483	87.7466	71.3895
KO ( BCc_SHK3Dr, SCc_CHORS, SCc_AOXSr2, SCc_BTS5 )	25	97.8704	74.7483	79.4608	54.3739
KO ( BCc_SHK3Dr, SCc_CHORS, SCc_DHFS )	25	97.8704	74.7483	79.4608	100
KO ( BCc_SHK3Dr, SCc_CHORS, BCc_AOXSr2, SCc_BTS5 )	25	97.8701	74.7483	79.4608	85.8671
KO ( BCc_SHK3Dr, SCc_CHORS, SCc_AOXSr2, BCc_BTS5 )	25	97.87	74.7483	79.4608	65.4447
KO ( BCc_SHK3Dr, SCc_CHORS, BCc_AOXSr2, BCc_BTS5 )	25	97.8698	74.7483	79.4608	58.6592
KO ( BCc_SHK3Dr, SCc_CHORS, BCc_TRPS3, SCc_AOXSr2 )	25	97.8605	65.7951	79.4608	66.0877
KO ( BCc_SHK3Dr, SCc_CHORS, BCc_TRPS3, SCc_BTS5 )	25	97.8605	65.7951	79.4608	100
KO ( BCc_SHK3Dr, SCc_CHORS, BCc_TRPS3, BCc_AOXSr2 )	25	97.8602	65.7951	79.4608	85.8671
KO ( BCc_SHK3Dr, SCc_CHORS, BCc_TRPS3, BCc_BTS5 )	25	97.8601	65.7951	79.4608	71.3895
KO ( BCc_SHK3Dr, SCc_CHORS, BCc_DHFS )	25	97.8359	74.7483	53.3624	100
KO ( BCc_SHK3Dr, SCc_CHORS, SCc_TRPS3, SCc_AOXSr2 )	25	97.7891	69.3226	79.4608	66.0877
KO ( BCc_SHK3Dr, SCc_CHORS, SCc_TRPS3, SCc_BTS5 )	25	97.7891	69.3226	79.4608	100
KO ( BCc_SHK3Dr, SCc_CHORS, SCc_TRPS3, BCc_AOXSr2 )	25	97.7888	69.3226	79.4608	85.8671
KO ( BCc_SHK3Dr, SCc_CHORS, SCc_TRPS3, BCc_BTS5 )	25	97.7887	69.3226	79.4608	71.3895
KO ( SCc_SHK3Dr, SCc_ANS, SCc_AOXSr2, SCc_BTS5 )	23.5294	99.9998	100	97.2133	54.3739
KO ( SCc_SHK3Dr, SCc_ANS, BCc_AOXSr2, SCc_BTS5 )	23.5294	99.9995	100	97.2133	85.8671
KO ( SCc_SHK3Dr, SCc_ANS, SCc_AOXSr2, BCc_BTS5 )	23.5294	99.9993	100	97.2133	66.0396
KO ( SCc_SHK3Dr, SCc_ANS, SCc_DHFS )	23.5294	99.9992	100	93.2524	100
KO ( SCc_SHK3Dr, SCc_ANS, BCc_AOXSr2, BCc_BTS5 )	23.5294	99.9991	100	97.2133	58.6592
KO ( SCc_SHK3Dr, SCc_ANS, BCc_TRPS3, SCc_AOXSr2 )	23.5294	99.9894	99.8041	97.2133	66.0877
KO ( SCc_SHK3Dr, SCc_ANS, BCc_TRPS3, SCc_BTS5 )	23.5294	99.9894	99.8041	97.2133	100
KO ( SCc_SHK3Dr, SCc_ANS, BCc_TRPS3, BCc_AOXSr2 )	23.5294	99.9891	99.8041	97.2133	85.8671
KO ( SCc_SHK3Dr, SCc_ANS, BCc_TRPS3, BCc_BTS5 )	23.5294	99.989	99.8041	97.2133	71.3895
KO ( SCc_SHK3Dr, SCc_ANS, BCc_DHFS )	23.5294	99.9759	100	71.3012	100
KO ( SCc_SHK3Dr, SCc_ANS, SCc_TRPS3, SCc_AOXSr2 )	23.5294	99.9149	64.666	97.2133	66.0877
KO ( SCc_SHK3Dr, SCc_ANS, SCc_TRPS3, SCc_BTS5 )	23.5294	99.9149	64.666	97.2133	100
KO ( SCc_SHK3Dr, SCc_ANS, SCc_TRPS3, BCc_AOXSr2 )	23.5294	99.9146	64.666	97.2133	85.8671
KO ( SCc_SHK3Dr, SCc_ANS, SCc_TRPS3, BCc_BTS5 )	23.5294	99.9144	64.666	97.2133	71.3895
KO ( SCc_SHK3Dr, BCc_ANS, BCc_TRPS3, SCc_AOXSr2 )	23.5294	99.817	75.7557	97.2133	66.0877
KO ( SCc_SHK3Dr, BCc_ANS, BCc_TRPS3, SCc_BTS5 )	23.5294	99.817	75.7557	97.2133	100
KO ( SCc_SHK3Dr, BCc_ANS, SCc_AOXSr2, SCc_BTS5 )	23.5294	99.817	75.9926	97.2133	54.3739
KO ( SCc_SHK3Dr, BCc_ANS, BCc_AOXSr2, SCc_BTS5 )	23.5294	99.8167	75.9926	97.2133	85.8671
KO ( SCc_SHK3Dr, BCc_ANS, BCc_TRPS3, BCc_AOXSr2 )	23.5294	99.8167	75.7557	97.2133	85.8671
KO ( SCc_SHK3Dr, BCc_ANS, BCc_TRPS3, BCc_BTS5 )	23.5294	99.8165	75.7557	97.2133	71.3895
KO ( SCc_SHK3Dr, BCc_ANS, SCc_AOXSr2, BCc_BTS5 )	23.5294	99.8165	75.9926	97.2133	66.0396
KO ( SCc_SHK3Dr, BCc_ANS, SCc_DHFS )	23.5294	99.8164	75.9926	93.2524	100
KO ( SCc_SHK3Dr, BCc_ANS, BCc_AOXSr2, BCc_BTS5 )	23.5294	99.8163	75.9926	97.2133	58.6592
KO ( SCc_SHK3Dr, BCc_ANS, BCc_DHFS )	23.5294	99.7932	75.9926	71.3012	100
KO ( BCc_SHK3Dr, BCc_ANS, BCc_TRPS3, SCc_AOXSr2 )	23.5294	99.6053	64.421	79.4608	66.0877
KO ( BCc_SHK3Dr, BCc_ANS, BCc_TRPS3, SCc_BTS5 )	23.5294	99.6053	64.421	79.4608	100
KO ( BCc_SHK3Dr, BCc_ANS, SCc_AOXSr2, SCc_BTS5 )	23.5294	99.6053	64.421	79.4608	54.3739
KO ( BCc_SHK3Dr, BCc_ANS, BCc_AOXSr2, SCc_BTS5 )	23.5294	99.605	64.421	79.4608	85.8671
KO ( BCc_SHK3Dr, BCc_ANS, BCc_TRPS3, BCc_AOXSr2 )	23.5294	99.605	64.421	79.4608	85.8671
KO ( BCc_SHK3Dr, BCc_ANS, BCc_TRPS3, BCc_BTS5 )	23.5294	99.6048	64.421	79.4608	71.3895
KO ( BCc_SHK3Dr, BCc_ANS, SCc_AOXSr2, BCc_BTS5 )	23.5294	99.6048	64.421	79.4608	65.4447
KO ( BCc_SHK3Dr, BCc_ANS, BCc_AOXSr2, BCc_BTS5 )	23.5294	99.6046	64.421	79.4608	58.6592
KO ( BCc_SHK3Dr, BCc_ANS, SCc_DHFS )	23.5294	99.6044	64.421	79.4608	100
KO ( BCc_SHK3Dr, SCc_ANS, SCc_AOXSr2, SCc_BTS5 )	23.5294	99.6024	75.922	79.4608	54.3739
KO ( BCc_SHK3Dr, SCc_ANS, BCc_AOXSr2, SCc_BTS5 )	23.5294	99.6021	75.922	79.4608	85.8671
KO ( BCc_SHK3Dr, SCc_ANS, SCc_AOXSr2, BCc_BTS5 )	23.5294	99.602	75.922	79.4608	65.4447
KO ( BCc_SHK3Dr, SCc_ANS, BCc_AOXSr2, BCc_BTS5 )	23.5294	99.6018	75.922	79.4608	58.6592
KO ( BCc_SHK3Dr, SCc_ANS, SCc_DHFS )	23.5294	99.6015	75.922	79.4608	100
KO ( BCc_SHK3Dr, SCc_ANS, BCc_TRPS3, SCc_AOXSr2 )	23.5294	99.5922	65.7951	79.4608	66.0877
KO ( BCc_SHK3Dr, SCc_ANS, BCc_TRPS3, SCc_BTS5 )	23.5294	99.5922	65.7951	79.4608	100
KO ( BCc_SHK3Dr, SCc_ANS, BCc_TRPS3, BCc_AOXSr2 )	23.5294	99.5919	65.7951	79.4608	85.8671
KO ( BCc_SHK3Dr, SCc_ANS, BCc_TRPS3, BCc_BTS5 )	23.5294	99.5917	65.7951	79.4608	71.3895
KO ( BCc_SHK3Dr, BCc_ANS, BCc_DHFS )	23.5294	99.5878	64.421	63.8108	100
KO ( BCc_SHK3Dr, SCc_ANS, BCc_DHFS )	23.5294	99.585	75.922	63.8108	100
KO ( BCc_SHK3Dr, SCc_ANS, SCc_TRPS3, SCc_AOXSr2 )	23.5294	99.5182	75.922	79.4608	66.0877
KO ( BCc_SHK3Dr, SCc_ANS, SCc_TRPS3, SCc_BTS5 )	23.5294	99.5182	75.922	79.4608	100
KO ( BCc_SHK3Dr, SCc_ANS, SCc_TRPS3, BCc_AOXSr2 )	23.5294	99.5179	75.922	79.4608	85.8671
KO ( BCc_SHK3Dr, SCc_ANS, SCc_TRPS3, BCc_BTS5 )	23.5294	99.5178	75.922	79.4608	71.3895
KO ( SCc_SHK3Dr, BCc_ANS, SCc_TRPS3, SCc_AOXSr2 )	23.5294	99.3608	68.0949	97.2133	66.0877
KO ( SCc_SHK3Dr, BCc_ANS, SCc_TRPS3, SCc_BTS5 )	23.5294	99.3608	68.0949	97.2133	100
KO ( SCc_SHK3Dr, BCc_ANS, SCc_TRPS3, BCc_AOXSr2 )	23.5294	99.3605	68.0949	97.2133	85.8671
KO ( SCc_SHK3Dr, BCc_ANS, SCc_TRPS3, BCc_BTS5 )	23.5294	99.3604	68.0949	97.2133	71.3895
KO ( BCc_SHK3Dr, BCc_ANS, SCc_TRPS3, SCc_AOXSr2 )	23.5294	99.151	59.6414	79.4608	66.0877
KO ( BCc_SHK3Dr, BCc_ANS, SCc_TRPS3, SCc_BTS5 )	23.5294	99.151	59.6414	79.4608	100
KO ( BCc_SHK3Dr, BCc_ANS, SCc_TRPS3, BCc_AOXSr2 )	23.5294	99.1507	58.8917	79.4608	85.8671
KO ( BCc_SHK3Dr, BCc_ANS, SCc_TRPS3, BCc_BTS5 )	23.5294	99.1506	58.8917	79.4608	71.3895
KO ( SCc_CHORS, SCc_ANS, SCc_AOXSr2, SCc_BTS5 )	22.0588	99.9992	100	93.2524	54.3739
KO ( SCc_CHORS, SCc_ANS, SCc_DHFS )	22.0588	99.9992	100	93.2524	100
KO ( SCc_DHFS, SCc_AOXSr2 )	22.0588	99.9992	100	95.6308	66.0877
KO ( SCc_DHFS, SCc_BTS5 )	22.0588	99.9992	100	95.6308	100
KO ( SCc_DHFS, BCc_AOXSr2 )	22.0588	99.9989	100	95.6308	85.8671
KO ( SCc_CHORS, SCc_ANS, BCc_AOXSr2, SCc_BTS5 )	22.0588	99.9989	100	93.2524	85.8671
KO ( SCc_CHORS, SCc_ANS, SCc_AOXSr2, BCc_BTS5 )	22.0588	99.9987	100	93.2524	66.0396
KO ( SCc_DHFS, BCc_BTS5 )	22.0588	99.9987	100	95.6308	71.3895
KO ( SCc_CHORS, SCc_ANS, BCc_AOXSr2, BCc_BTS5 )	22.0588	99.9985	100	93.2524	58.6592
KO ( BCc_TRPS3, SCc_AOXSr2, SCc_BTS5 )	22.0588	99.9896	99.8041	100	54.3739
KO ( BCc_TRPS3, BCc_AOXSr2, SCc_BTS5 )	22.0588	99.9894	99.8041	100	85.8671
KO ( BCc_TRPS3, SCc_AOXSr2, BCc_BTS5 )	22.0588	99.9892	99.8041	100	66.0396
KO ( BCc_TRPS3, BCc_AOXSr2, BCc_BTS5 )	22.0588	99.989	99.8041	100	58.6592
KO ( SCc_CHORS, SCc_ANS, BCc_TRPS3, SCc_AOXSr2 )	22.0588	99.9888	99.8041	93.2524	66.0877
KO ( SCc_CHORS, SCc_ANS, BCc_TRPS3, SCc_BTS5 )	22.0588	99.9888	99.8041	93.2524	100
KO ( BCc_TRPS3, SCc_DHFS )	22.0588	99.9888	99.8041	95.6308	100
KO ( SCc_CHORS, SCc_ANS, BCc_TRPS3, BCc_AOXSr2 )	22.0588	99.9885	99.8041	93.2524	85.8671
KO ( SCc_CHORS, SCc_ANS, BCc_TRPS3, BCc_BTS5 )	22.0588	99.9884	99.8041	93.2524	71.3895
KO ( BCc_DHFS, SCc_AOXSr2 )	22.0588	99.9809	100	71.3012	66.0877
KO ( BCc_DHFS, SCc_BTS5 )	22.0588	99.9809	100	71.3012	100
KO ( BCc_DHFS, BCc_AOXSr2 )	22.0588	99.9806	100	71.3012	85.8671
KO ( BCc_DHFS, BCc_BTS5 )	22.0588	99.9805	100	71.3012	71.3895
KO ( BCc_TRPS3, BCc_DHFS )	22.0588	99.9706	99.8041	71.3012	100
KO ( SCc_CHORS, SCc_ANS, BCc_DHFS )	22.0588	99.9631	100	63.2246	100
KO ( SCc_TRPS3, SCc_AOXSr2, SCc_BTS5 )	22.0588	99.9151	80.2992	100	54.3739
KO ( SCc_TRPS3, BCc_AOXSr2, SCc_BTS5 )	22.0588	99.9148	80.2992	100	85.8671
KO ( SCc_TRPS3, SCc_AOXSr2, BCc_BTS5 )	22.0588	99.9147	80.2992	100	66.0396
KO ( SCc_TRPS3, BCc_AOXSr2, BCc_BTS5 )	22.0588	99.9145	80.2992	100	58.6592
KO ( SCc_CHORS, SCc_ANS, SCc_TRPS3, SCc_AOXSr2 )	22.0588	99.9143	69.3226	93.2524	66.0877
KO ( SCc_CHORS, SCc_ANS, SCc_TRPS3, SCc_BTS5 )	22.0588	99.9143	69.3226	93.2524	100
KO ( SCc_TRPS3, SCc_DHFS )	22.0588	99.9143	80.2992	95.6308	100
KO ( SCc_CHORS, SCc_ANS, SCc_TRPS3, BCc_AOXSr2 )	22.0588	99.914	69.3226	93.2524	85.8671
KO ( SCc_CHORS, SCc_ANS, SCc_TRPS3, BCc_BTS5 )	22.0588	99.9139	69.3226	93.2524	71.3895
KO ( SCc_TRPS3, BCc_DHFS )	22.0588	99.896	80.2992	71.3012	100
KO ( BCc_CHORS, BCc_ANS, BCc_TRPS3, SCc_AOXSr2 )	22.0588	99.6053	75.7557	87.7466	66.0877
KO ( BCc_CHORS, BCc_ANS, BCc_TRPS3, SCc_BTS5 )	22.0588	99.6053	75.7557	87.7466	100
KO ( BCc_CHORS, BCc_ANS, SCc_AOXSr2, SCc_BTS5 )	22.0588	99.6053	75.9926	87.7466	54.3739
KO ( BCc_CHORS, BCc_ANS, BCc_AOXSr2, SCc_BTS5 )	22.0588	99.605	75.9926	87.7466	85.8671
KO ( BCc_CHORS, BCc_ANS, BCc_TRPS3, BCc_AOXSr2 )	22.0588	99.605	75.7557	87.7466	85.8671
KO ( BCc_CHORS, BCc_ANS, BCc_TRPS3, BCc_BTS5 )	22.0588	99.6048	75.7557	87.7466	71.3895
KO ( BCc_CHORS, BCc_ANS, SCc_AOXSr2, BCc_BTS5 )	22.0588	99.6048	75.9926	87.7466	64.5949
KO ( BCc_CHORS, BCc_ANS, BCc_AOXSr2, BCc_BTS5 )	22.0588	99.6046	75.9926	87.7466	58.6592
KO ( BCc_CHORS, BCc_ANS, SCc_DHFS )	22.0588	99.6044	75.9926	86.2162	100
KO ( BCc_CHORS, SCc_ANS, SCc_AOXSr2, SCc_BTS5 )	22.0588	99.6024	82.9894	87.7466	54.3739
KO ( BCc_CHORS, SCc_ANS, BCc_AOXSr2, SCc_BTS5 )	22.0588	99.6021	82.9894	87.7466	85.8671
KO ( BCc_CHORS, SCc_ANS, SCc_AOXSr2, BCc_BTS5 )	22.0588	99.602	82.9894	87.7466	64.5949
KO ( BCc_CHORS, SCc_ANS, BCc_AOXSr2, BCc_BTS5 )	22.0588	99.6018	82.9894	87.7466	58.6592
KO ( BCc_CHORS, SCc_ANS, SCc_DHFS )	22.0588	99.6015	82.9894	86.2162	100
KO ( BCc_CHORS, SCc_ANS, BCc_TRPS3, SCc_AOXSr2 )	22.0588	99.5922	75.2806	87.7466	66.0877
KO ( BCc_CHORS, SCc_ANS, BCc_TRPS3, SCc_BTS5 )	22.0588	99.5922	75.2806	87.7466	100
KO ( BCc_CHORS, SCc_ANS, BCc_TRPS3, BCc_AOXSr2 )	22.0588	99.5919	75.2806	87.7466	85.8671
KO ( BCc_CHORS, SCc_ANS, BCc_TRPS3, BCc_BTS5 )	22.0588	99.5917	75.2806	87.7466	71.3895
KO ( BCc_CHORS, BCc_ANS, BCc_DHFS )	22.0588	99.5878	75.9926	71.3012	100
KO ( BCc_CHORS, SCc_ANS, BCc_DHFS )	22.0588	99.585	82.9894	71.3012	100
KO ( BCc_CHORS, SCc_ANS, SCc_TRPS3, SCc_AOXSr2 )	22.0588	99.5182	77.8564	87.7466	66.0877
KO ( BCc_CHORS, SCc_ANS, SCc_TRPS3, SCc_BTS5 )	22.0588	99.5182	77.8564	87.7466	100
KO ( BCc_CHORS, SCc_ANS, SCc_TRPS3, BCc_AOXSr2 )	22.0588	99.5179	77.8564	87.7466	85.8671
KO ( BCc_CHORS, SCc_ANS, SCc_TRPS3, BCc_BTS5 )	22.0588	99.5178	77.8564	87.7466	71.3895
KO ( SCc_CHORS, BCc_ANS, BCc_TRPS3, SCc_AOXSr2 )	22.0588	99.4545	68.443	93.2524	66.0877
KO ( SCc_CHORS, BCc_ANS, BCc_TRPS3, SCc_BTS5 )	22.0588	99.4545	68.443	93.2524	100
KO ( SCc_CHORS, BCc_ANS, SCc_AOXSr2, SCc_BTS5 )	22.0588	99.4545	68.443	93.2524	54.3739
KO ( SCc_CHORS, BCc_ANS, SCc_DHFS )	22.0588	99.4545	68.443	93.2524	100
KO ( SCc_CHORS, BCc_ANS, BCc_AOXSr2, SCc_BTS5 )	22.0588	99.4542	68.443	93.2524	85.8671
KO ( SCc_CHORS, BCc_ANS, BCc_TRPS3, BCc_AOXSr2 )	22.0588	99.4542	68.443	93.2524	85.8671
KO ( SCc_CHORS, BCc_ANS, SCc_AOXSr2, BCc_BTS5 )	22.0588	99.4541	68.443	93.2524	66.0396
KO ( SCc_CHORS, BCc_ANS, BCc_TRPS3, BCc_BTS5 )	22.0588	99.4541	68.443	93.2524	71.3895
KO ( SCc_CHORS, BCc_ANS, BCc_AOXSr2, BCc_BTS5 )	22.0588	99.4539	68.443	93.2524	58.6592
KO ( SCc_CHORS, BCc_ANS, BCc_DHFS )	22.0588	99.4189	68.443	63.2246	100
KO ( BCc_CHORS, BCc_ANS, SCc_TRPS3, SCc_AOXSr2 )	22.0588	99.151	69.0952	87.7466	66.0877
KO ( BCc_CHORS, BCc_ANS, SCc_TRPS3, SCc_BTS5 )	22.0588	99.151	69.0952	87.7466	100
KO ( BCc_CHORS, BCc_ANS, SCc_TRPS3, BCc_AOXSr2 )	22.0588	99.1507	69.0952	87.7466	85.8671
KO ( BCc_CHORS, BCc_ANS, SCc_TRPS3, BCc_BTS5 )	22.0588	99.1506	69.0952	87.7466	71.3895
KO ( SCc_CHORS, BCc_ANS, SCc_TRPS3, SCc_AOXSr2 )	22.0588	99.0017	55.5082	93.2524	66.0877
KO ( SCc_CHORS, BCc_ANS, SCc_TRPS3, SCc_BTS5 )	22.0588	99.0017	55.5082	93.2524	100
KO ( SCc_CHORS, BCc_ANS, SCc_TRPS3, BCc_AOXSr2 )	22.0588	99.0014	55.5082	93.2524	85.8671
KO ( SCc_CHORS, BCc_ANS, SCc_TRPS3, BCc_BTS5 )	22.0588	99.0012	55.5082	93.2524	71.3895
KO ( SCc_SHK3Dr, SCc_AOXSr2, SCc_BTS5 )	20.5882	99.9998	100	97.2133	54.3739
KO ( SCc_SHK3Dr, BCc_AOXSr2, SCc_BTS5 )	20.5882	99.9995	100	97.2133	85.8671
KO ( SCc_SHK3Dr, SCc_AOXSr2, BCc_BTS5 )	20.5882	99.9993	100	97.2133	66.0396
KO ( SCc_SHK3Dr, SCc_CHORS, SCc_ANS, SCc_AOXSr2 )	20.5882	99.9992	100	93.2524	66.0877
KO ( SCc_SHK3Dr, SCc_CHORS, SCc_ANS, SCc_BTS5 )	20.5882	99.9992	100	93.2524	100
KO ( SCc_SHK3Dr, SCc_DHFS )	20.5882	99.9992	100	93.2524	100
KO ( SCc_SHK3Dr, BCc_AOXSr2, BCc_BTS5 )	20.5882	99.9991	100	97.2133	58.6592
KO ( SCc_SHK3Dr, SCc_CHORS, SCc_ANS, BCc_AOXSr2 )	20.5882	99.9989	100	93.2524	85.8671
KO ( SCc_SHK3Dr, SCc_CHORS, SCc_ANS, BCc_BTS5 )	20.5882	99.9987	100	93.2524	71.3895
KO ( SCc_SHK3Dr, BCc_TRPS3, SCc_AOXSr2 )	20.5882	99.9894	99.8041	97.2133	66.0877
KO ( SCc_SHK3Dr, BCc_TRPS3, SCc_BTS5 )	20.5882	99.9894	99.8041	97.2133	100
KO ( SCc_SHK3Dr, BCc_TRPS3, BCc_AOXSr2 )	20.5882	99.9891	99.8041	97.2133	85.8671
KO ( SCc_SHK3Dr, BCc_TRPS3, BCc_BTS5 )	20.5882	99.989	99.8041	97.2133	71.3895
KO ( SCc_SHK3Dr, SCc_CHORS, SCc_ANS, BCc_TRPS3 )	20.5882	99.9888	99.8041	93.2524	100
KO ( SCc_SHK3Dr, BCc_DHFS )	20.5882	99.9759	100	71.3012	100
KO ( SCc_SHK3Dr, SCc_TRPS3, SCc_AOXSr2 )	20.5882	99.9149	71.51	97.2133	66.0877
KO ( SCc_SHK3Dr, SCc_TRPS3, SCc_BTS5 )	20.5882	99.9149	71.51	97.2133	100
KO ( SCc_SHK3Dr, SCc_TRPS3, BCc_AOXSr2 )	20.5882	99.9146	71.51	97.2133	85.8671
KO ( SCc_SHK3Dr, SCc_TRPS3, BCc_BTS5 )	20.5882	99.9144	71.51	97.2133	71.3895
KO ( SCc_SHK3Dr, SCc_CHORS, SCc_ANS, SCc_TRPS3 )	20.5882	99.9143	64.666	93.2524	100
KO ( BCc_SHK3Dr, BCc_CHORS, BCc_ANS, BCc_TRPS3 )	20.5882	99.6053	64.421	73.149	100
KO ( BCc_SHK3Dr, BCc_CHORS, BCc_ANS, SCc_AOXSr2 )	20.5882	99.6053	64.421	73.149	66.0877
KO ( BCc_SHK3Dr, BCc_CHORS, BCc_ANS, SCc_BTS5 )	20.5882	99.6053	64.421	73.149	100
KO ( BCc_SHK3Dr, BCc_TRPS3, SCc_AOXSr2 )	20.5882	99.6053	65.7951	79.4608	66.0877
KO ( BCc_SHK3Dr, BCc_TRPS3, SCc_BTS5 )	20.5882	99.6053	65.7951	79.4608	100
KO ( BCc_SHK3Dr, SCc_AOXSr2, SCc_BTS5 )	20.5882	99.6053	75.922	79.4608	54.3739
KO ( BCc_SHK3Dr, BCc_AOXSr2, SCc_BTS5 )	20.5882	99.605	75.922	79.4608	85.8671
KO ( BCc_SHK3Dr, BCc_CHORS, BCc_ANS, BCc_AOXSr2 )	20.5882	99.605	64.421	73.149	85.8671
KO ( BCc_SHK3Dr, BCc_TRPS3, BCc_AOXSr2 )	20.5882	99.605	65.7951	79.4608	85.8671
KO ( BCc_SHK3Dr, SCc_AOXSr2, BCc_BTS5 )	20.5882	99.6048	75.922	79.4608	65.4447
KO ( BCc_SHK3Dr, BCc_TRPS3, BCc_BTS5 )	20.5882	99.6048	65.7951	79.4608	71.3895
KO ( BCc_SHK3Dr, BCc_CHORS, BCc_ANS, BCc_BTS5 )	20.5882	99.6048	64.421	73.149	71.3895
KO ( BCc_SHK3Dr, BCc_AOXSr2, BCc_BTS5 )	20.5882	99.6046	75.922	79.4608	58.6592
KO ( BCc_SHK3Dr, SCc_DHFS )	20.5882	99.6044	75.922	79.4608	100
KO ( BCc_SHK3Dr, BCc_CHORS, SCc_ANS, SCc_AOXSr2 )	20.5882	99.6024	75.163	73.149	66.0877
KO ( BCc_SHK3Dr, BCc_CHORS, SCc_ANS, SCc_BTS5 )	20.5882	99.6024	75.163	73.149	100
KO ( BCc_SHK3Dr, BCc_CHORS, SCc_ANS, BCc_AOXSr2 )	20.5882	99.6021	75.163	73.149	85.8671
KO ( BCc_SHK3Dr, BCc_CHORS, SCc_ANS, BCc_BTS5 )	20.5882	99.602	75.163	73.149	71.3895
KO ( BCc_SHK3Dr, BCc_CHORS, SCc_ANS, BCc_TRPS3 )	20.5882	99.5922	60.7398	73.149	100
KO ( BCc_SHK3Dr, BCc_DHFS )	20.5882	99.5878	75.922	63.8108	100
KO ( BCc_SHK3Dr, BCc_CHORS, SCc_ANS, SCc_TRPS3 )	20.5882	99.5182	75.163	73.149	100
KO ( BCc_SHK3Dr, SCc_TRPS3, SCc_AOXSr2 )	20.5882	99.5182	75.922	79.4608	66.0877
KO ( BCc_SHK3Dr, SCc_TRPS3, SCc_BTS5 )	20.5882	99.5182	75.922	79.4608	100
KO ( BCc_SHK3Dr, SCc_TRPS3, BCc_AOXSr2 )	20.5882	99.5179	75.922	79.4608	85.8671
KO ( BCc_SHK3Dr, SCc_TRPS3, BCc_BTS5 )	20.5882	99.5178	75.922	79.4608	71.3895
KO ( SCc_SHK3Dr, SCc_CHORS, BCc_ANS, SCc_AOXSr2 )	20.5882	99.4545	68.443	93.2524	66.0877
KO ( SCc_SHK3Dr, SCc_CHORS, BCc_ANS, SCc_BTS5 )	20.5882	99.4545	68.443	93.2524	100
KO ( SCc_SHK3Dr, SCc_CHORS, BCc_ANS, BCc_TRPS3 )	20.5882	99.4545	68.443	93.2524	100
KO ( SCc_SHK3Dr, SCc_CHORS, BCc_ANS, BCc_AOXSr2 )	20.5882	99.4542	68.443	93.2524	85.8671
KO ( SCc_SHK3Dr, SCc_CHORS, BCc_ANS, BCc_BTS5 )	20.5882	99.4541	68.443	93.2524	71.3895
KO ( BCc_SHK3Dr, BCc_CHORS, BCc_ANS, SCc_TRPS3 )	20.5882	99.151	59.6414	73.149	100
KO ( SCc_SHK3Dr, SCc_CHORS, BCc_ANS, SCc_TRPS3 )	20.5882	99.0017	55.5082	93.2524	100
KO ( SCc_SHK3Dr, BCc_CHORS, BCc_ANS, BCc_TRPS3 )	20.5882	98.3732	75.7557	87.7466	100
KO ( SCc_SHK3Dr, BCc_CHORS, BCc_ANS, SCc_AOXSr2 )	20.5882	98.3732	75.9926	87.7466	66.0877
KO ( SCc_SHK3Dr, BCc_CHORS, BCc_ANS, SCc_BTS5 )	20.5882	98.3732	75.9926	87.7466	100
KO ( SCc_SHK3Dr, BCc_CHORS, BCc_ANS, BCc_AOXSr2 )	20.5882	98.373	75.9926	87.7466	85.8671
KO ( SCc_SHK3Dr, BCc_CHORS, BCc_ANS, BCc_BTS5 )	20.5882	98.3728	75.9926	87.7466	71.3895
KO ( SCc_SHK3Dr, BCc_CHORS, SCc_ANS, SCc_AOXSr2 )	20.5882	98.3705	82.9894	87.7466	66.0877
KO ( SCc_SHK3Dr, BCc_CHORS, SCc_ANS, SCc_BTS5 )	20.5882	98.3705	82.9894	87.7466	100
KO ( SCc_SHK3Dr, BCc_CHORS, SCc_ANS, BCc_AOXSr2 )	20.5882	98.3702	82.9894	87.7466	85.8671
KO ( SCc_SHK3Dr, BCc_CHORS, SCc_ANS, BCc_BTS5 )	20.5882	98.3701	82.9894	87.7466	71.3895
KO ( SCc_SHK3Dr, BCc_CHORS, SCc_ANS, BCc_TRPS3 )	20.5882	98.3605	75.2806	87.7466	100
KO ( SCc_SHK3Dr, BCc_CHORS, SCc_ANS, SCc_TRPS3 )	20.5882	98.2883	63.3807	87.7466	100
KO ( SCc_SHK3Dr, BCc_CHORS, BCc_ANS, SCc_TRPS3 )	20.5882	97.9301	68.0949	87.7466	100
KO ( BCc_SHK3Dr, SCc_CHORS, SCc_ANS, SCc_AOXSr2 )	20.5882	97.8704	74.7483	79.4608	66.0877
KO ( BCc_SHK3Dr, SCc_CHORS, SCc_ANS, SCc_BTS5 )	20.5882	97.8704	74.7483	79.4608	100
KO ( BCc_SHK3Dr, SCc_CHORS, SCc_ANS, BCc_AOXSr2 )	20.5882	97.8701	74.7483	79.4608	85.8671
KO ( BCc_SHK3Dr, SCc_CHORS, SCc_ANS, BCc_BTS5 )	20.5882	97.87	74.7483	79.4608	71.3895
KO ( BCc_SHK3Dr, SCc_CHORS, SCc_ANS, BCc_TRPS3 )	20.5882	97.8605	65.7951	79.4608	100
KO ( BCc_SHK3Dr, SCc_CHORS, SCc_ANS, SCc_TRPS3 )	20.5882	97.7891	69.3226	79.4608	100
KO ( BCc_SHK3Dr, SCc_CHORS, BCc_ANS, BCc_TRPS3 )	20.5882	97.3486	50.3734	79.4608	100
KO ( BCc_SHK3Dr, SCc_CHORS, BCc_ANS, SCc_AOXSr2 )	20.5882	97.3486	50.3734	79.4608	66.0877
KO ( BCc_SHK3Dr, SCc_CHORS, BCc_ANS, SCc_BTS5 )	20.5882	97.3486	50.3734	79.4608	100
KO ( BCc_SHK3Dr, SCc_CHORS, BCc_ANS, BCc_AOXSr2 )	20.5882	97.3484	50.3734	79.4608	85.8671
KO ( BCc_SHK3Dr, SCc_CHORS, BCc_ANS, BCc_BTS5 )	20.5882	97.3482	50.3734	79.4608	71.3895
KO ( BCc_SHK3Dr, SCc_CHORS, BCc_ANS, SCc_TRPS3 )	20.5882	96.9147	47.9038	79.4608	100
KO ( SCc_CHORS, SCc_AOXSr2, SCc_BTS5 )	19.1176	99.9992	100	93.2524	54.3739
KO ( SCc_CHORS, SCc_DHFS )	19.1176	99.9992	100	93.2524	100
KO ( SCc_CHORS, BCc_AOXSr2, SCc_BTS5 )	19.1176	99.9989	100	93.2524	85.8671
KO ( SCc_CHORS, SCc_AOXSr2, BCc_BTS5 )	19.1176	99.9987	100	93.2524	66.0396
KO ( SCc_CHORS, BCc_AOXSr2, BCc_BTS5 )	19.1176	99.9985	100	93.2524	58.6592
KO ( SCc_CHORS, BCc_TRPS3, SCc_AOXSr2 )	19.1176	99.9888	99.8041	93.2524	66.0877
KO ( SCc_CHORS, BCc_TRPS3, SCc_BTS5 )	19.1176	99.9888	99.8041	93.2524	100
KO ( SCc_CHORS, BCc_TRPS3, BCc_AOXSr2 )	19.1176	99.9885	99.8041	93.2524	85.8671
KO ( SCc_CHORS, BCc_TRPS3, BCc_BTS5 )	19.1176	99.9884	99.8041	93.2524	71.3895
KO ( SCc_CHORS, BCc_DHFS )	19.1176	99.9631	100	63.2246	100
KO ( SCc_CHORS, SCc_TRPS3, SCc_AOXSr2 )	19.1176	99.9143	69.3226	93.2524	66.0877
KO ( SCc_CHORS, SCc_TRPS3, SCc_BTS5 )	19.1176	99.9143	69.3226	93.2524	100
KO ( SCc_CHORS, SCc_TRPS3, BCc_AOXSr2 )	19.1176	99.914	69.3226	93.2524	85.8671
KO ( SCc_CHORS, SCc_TRPS3, BCc_BTS5 )	19.1176	99.9139	69.3226	93.2524	71.3895
KO ( BCc_CHORS, SCc_AOXSr2, SCc_BTS5 )	19.1176	99.6053	86.3667	87.7466	54.3739
KO ( BCc_CHORS, BCc_TRPS3, SCc_AOXSr2 )	19.1176	99.6053	75.7557	87.7466	66.0877
KO ( BCc_CHORS, BCc_TRPS3, SCc_BTS5 )	19.1176	99.6053	75.7557	87.7466	100
KO ( BCc_CHORS, BCc_AOXSr2, SCc_BTS5 )	19.1176	99.605	86.3667	87.7466	85.8671
KO ( BCc_CHORS, BCc_TRPS3, BCc_AOXSr2 )	19.1176	99.605	75.7557	87.7466	85.8671
KO ( BCc_CHORS, BCc_TRPS3, BCc_BTS5 )	19.1176	99.6048	75.7557	87.7466	71.3895
KO ( BCc_CHORS, SCc_AOXSr2, BCc_BTS5 )	19.1176	99.6048	86.3667	87.7466	64.5949
[truncated: 189 more rows]

## Sheet: ES name mapping
Enzyme Subset *	R. ID	Formula	EC number	Gene	Locus in BCc	Locus in SCc
ES1 (SHK3Dr)	DDPA	e4p+ h2o + pep →2dda7p+ pi	2.5.1.54	aroH	BCc_077	-
	DHQS	2dda7p→3dhq+ pi	4.2.3.4	aroB	BCc_352	-
	DHQD	3dhq → 3dhsk + h2o	4.2.1.10	aroQ	BCc_251	-
	SHK3Dr	3dhsk+ h + nadph → nadp + skm	1.1.1.25	aroE	BCc_312	-
ES2 (CHORS)	SHKK	Atp + skm → adp + h + skm5p	2.7.1.71	aroK	BCc_353	SCc_638
	PSCVT	Pep + skm5p → 3psme + pi	2.5.1.19	aroA	BCc_191	SCc_515
	CHORS	3psme → chor + pi	4.2.3.5	aroC	BCc_061	SCc_617
ES3 (ANS)	ANS	Chor + gln-L →anth+ glu-L + h + pyr	4.1.3.27	trpE & trpG	BCc_pT01 & BCc_pT02	-
ES4 (TRPS3)	ANPRT	anth + prpp → ppi + pran	2.4.2.18	trpD	-	SCc_377
	PRAIi	pran→2cpr5p	5.3.1.24	trpC	-	SCc_378
	IGPS	2cpr5p + h → 3ig3p + co2 + h2o	4.1.1.48	trpC	-	SCc_378
	TRPS3	3ig3p → g3p + indole	4.1.2.8	trpB	-	SCc_379
ES5 (DHFR)	GTPCI	gtp + h2o → ahdt + for + h	3.5.4.16	folE	-	SCc_538
	DNTPPA	ahdt + h2o → dhpmp + h + ppi	3.6.1.-	nudB	-	Orphan
	DNMPPA	dhpmp + h2o → dhnpt + pi	3.6.1.-	nudB	-	Orphan
	DHNPA2	dhnpt → 6hmhpt + gcald	4.1.2.25	folB	-	Orphan
	HPPK2	6hmhpt + atp → 6hmhptpp + amp + h	2.7.6.3	folK	-	SCc_275
	ADCS	chor + gln_L → 4adcho + glu_L	2.6.1.85	pabAB	-	SCc_516
	ADCL	4adcho → 4abz + h + pyr	4.1.3.38	pabC	-	SCc_438
	DHPS2	4abz + 6hmhptpp → dhpt + ppi	2.5.1.15	folP	-	SCc_061
	DHFS	atp + dhpt + glu_L → adp + dhf + h + pi	6.3.2.12	folC	-	SCc_494
	DHFR	dhf + h + nadph → nadp + thf	1.5.1.3	folA	-	SCc_118
ES6 (AOXSr2)	MALCOAMT	amet + malcoa → ahcys + malcoame	2.1.1.197	bioC	Orphan	-
	OGMEACPS	h + malACP + malcoame → co2 + coa + ogmeACP	2.3.1.41	fabB	BCc_056	-
	OGMEACPR	h + nadph + ogmeACP → hgmeACP + nadp	1.1.1.100	fabG	BCc_217	-
	OGMEACPD	hgmeACP → egmeACP + h2o	4.2.1.59	fabZ	BCc_147	-
	EPMEACPR	epmeACP + h + nadh → nad + pmeACP	1.3.1.9	fabI	BCc_167	-
	PMEACPE	h2o + pmeACP → meoh + pimACP	3.1.1.85	bioH	BCc_356	-
	AOXSr2	ala_L + pimACP → 8aonn + ACP + co2	2.3.1.47	bioF	Orphan	-
ES7 (BTS5)	AMAOTr	8aonn + amet → amob + dann	2.6.1.62	bioA	-	SCc_554
	DBTSr	atp + co2 + dann → adp + dtbt + 3 h + pi	6.3.3.3	bioD	-	SCc_552
	BTS5	amet + dtbt + h2s → btn + dad_5 + 3 h + met_L	2.8.1.6	bioB	-	SCc_553
