# Supplementary material for: Determinism and Contingency Shape Metabolic Complementation in an Endosymbiotic Consortium
Source: Front Microbiol. 2017 Nov 22;8:2290. doi: 10.3389/fmicb.2017.02290 (PMC5702781; doi:10.3389/fmicb.2017.02290)
Supplement: Supplementary Table S6 — Results from the reduced in-silico reduction experiments. The table includes three sheets. Each sheet includes the results of the reduction experiments for the tryptophan, tetrahydrofolate and biotin biosynthesis, when only the genes involved in each single pathway are considered for the experiment. [file Table6.XLSX]

## Sheet: Tryptophan_experiment
ID	fOpt	SCc_4PASPt	SCc_8AONNt	SCc_A5PISO	SCc_ACCOACr	SCc_ACKr	SCc_ACOATA	SCc_ACt	SCc_ADCL	SCc_ADCS	SCc_ADK1	SCc_ADSK	SCc_ADSL1r	SCc_ADSS	SCc_AGMHE	SCc_4AMPMt	SCc_AKGt	SCc_ALAALAr	SCc_ALAt	SCc_AMAOTr	SCc_ANPRT	SCc_ANTHt	SCc_APRAUR	SCc_ARGt	SCc_ASAD	SCc_ASNt	SCc_ASPCT	SCc_ASPt2	SCc_ATPM	SCc_ATPS4r	SCc_BPNT	SCc_BTNt	SCc_BTS5	SCc_Biomass_whith_wall_SCc	SCc_C120SN	SCc_C140SN	SCc_C141SN	SCc_C160SN	SCc_C161SN	SCc_C181SN	SCc_CBPS	SCc_CDPMEK	SCc_CHORS	SCc_CLPNS_SCc	SCc_CO2t	SCc_CPPPGO	SCc_CTPS2	SCc_CYSS	SCc_CYSt
R	9.37994	0	0	0	0	8.00488	0	15.6925	0	0	17.0675	7.68761	0	0	0	0	0	0	0	0	9.37994	9.0299	0	0	0	0	0	0	0	17.8332	7.68761	0	0	0	0	0	0	0	0	0	0	0	0.350039	0	40.6227	0	0	7.68761	7.68761
BCc_TRPS3	9.37994	0	0	0	0	8.00488	0	15.6925	0	0	17.0675	7.68761	0	0	0	0	0	0	0	0	9.37994	9.0299	0	0	0	0	0	0	0	17.8332	7.68761	0	0	0	0	0	0	0	0	0	0	0	0.350039	0	40.6227	0	0	7.68761	7.68761
SCc_ANS_&_BCc_TRPS3	9.35808	0	0	0	0	7.57225	0	14.621	0	0	16.4068	7.04873	0	0	0	0	0	0	0	0	9.35808	9.35808	0	0	0	0	0	0	0	16.9972	7.04873	0	0	0	0	0	0	0	0	0	0	0	0.81871	0	38.4859	0	0	7.04873	7.04873
SCc_ANS	9.35808	0	0	0	0	7.57225	0	14.621	0	0	16.4068	7.04873	0	0	0	0	0	0	0	0	9.35808	9.35808	0	0	0	0	0	0	0	16.9972	7.04873	0	0	0	0	0	0	0	0	0	0	0	0.81871	0	38.4859	0	0	7.04873	7.04873
SCc_SHK3Dr	9.31508	0	0	0	0	8.05419	0	15.7461	0	0	17.007	7.69192	0	0	0	0	0	0	0	0	9.31508	8.81086	0	0	0	0	0	0	0	17.7951	7.69192	0	0	0	0	0	0	0	0	0	0	0	0.504224	0	40.445	0	0	7.69192	7.69192
SCc_SHK3Dr_&_BCc_TRPS3	9.31508	0	0	0	0	8.05419	0	15.7461	0	0	17.007	7.69192	0	0	0	0	0	0	0	0	9.31508	8.81086	0	0	0	0	0	0	0	17.7951	7.69192	0	0	0	0	0	0	0	0	0	0	0	0.504224	0	40.445	0	0	7.69192	7.69192
SCc_SHKK_&_SCc_ANS	9.16017	0	0	0	0	7.5889	0	14.971	0	0	16.5422	7.38207	0	0	0	0	0	0	0	0	9.16017	9.16017	0	0	0	0	0	0	0	17.2292	7.38207	0	0	0	0	0	0	0	0	0	0	0	0	0	39.4456	0	0	7.38207	7.38207
SCc_SHKK_&_BCc_TRPS3	9.16017	0	0	0	0	7.5889	0	14.971	0	0	16.5422	7.38207	0	0	0	0	0	0	0	0	9.16017	9.16017	0	0	0	0	0	0	0	17.2292	7.38207	0	0	0	0	0	0	0	0	0	0	0	0	0	39.4456	0	0	7.38207	7.38207
SCc_SHKK	9.16017	0	0	0	0	7.5889	0	14.971	0	0	16.5422	7.38207	0	0	0	0	0	0	0	0	9.16017	9.16017	0	0	0	0	0	0	0	17.2292	7.38207	0	0	0	0	0	0	0	0	0	0	0	0	0	39.4456	0	0	7.38207	7.38207
SCc_SHKK_&_SCc_ANS_&_BCc_TRPS3	9.16017	0	0	0	0	7.5889	0	14.971	0	0	16.5422	7.38207	0	0	0	0	0	0	0	0	9.16017	9.16017	0	0	0	0	0	0	0	17.2292	7.38207	0	0	0	0	0	0	0	0	0	0	0	0	0	39.4456	0	0	7.38207	7.38207
SCc_SHK3Dr_&_SCc_SHKK	9.1175	0	0	0	0	8.08094	0	16.0035	0	0	17.0401	7.92256	0	0	0	0	0	0	0	0	9.1175	8.52417	0	0	0	0	0	0	0	17.91	7.92256	0	0	0	0	0	0	0	0	0	0	0	0	0	40.9661	0	0	7.92256	7.92256
SCc_SHK3Dr_&_SCc_SHKK_&_BCc_TRPS3	9.1175	0	0	0	0	8.08094	0	16.0035	0	0	17.0401	7.92256	0	0	0	0	0	0	0	0	9.1175	8.52417	0	0	0	0	0	0	0	17.91	7.92256	0	0	0	0	0	0	0	0	0	0	0	0	0	40.9661	0	0	7.92256	7.92256
SCc_SHK3Dr_&_SCc_SHKK_&_SCc_ANS_&_BCc_TRPS3	9.05512	0	0	0	0	7.84121	0	16.1089	0	0	17.3228	8.26772	0	0	0	0	0	0	0	0	9.05512	9.05512	0	0	0	0	0	0	0	18.1759	8.26772	0	0	0	0	0	0	0	0	0	0	0	0	0	41.6995	0	0	8.26772	8.26772
SCc_SHK3Dr_&_SCc_SHKK_&_SCc_ANS	9.05512	0	0	0	0	7.84121	0	16.1089	0	0	17.3228	8.26772	0	0	0	0	0	0	0	0	9.05512	9.05512	0	0	0	0	0	0	0	18.1759	8.26772	0	0	0	0	0	0	0	0	0	0	0	0	0	41.6995	0	0	8.26772	8.26772
SCc_SHK3Dr_&_SCc_ANS	9.05512	0	0	0	0	7.84121	0	16.1089	0	0	17.3228	8.26772	0	0	0	0	0	0	0	0	9.05512	9.05512	0	0	0	0	0	0	0	18.1759	8.26772	0	0	0	0	0	0	0	0	0	0	0	0	0	41.6995	0	0	8.26772	8.26772
SCc_SHK3Dr_&_SCc_ANS_&_BCc_TRPS3	9.05512	0	0	0	0	7.84121	0	16.1089	0	0	17.3228	8.26772	0	0	0	0	0	0	0	0	9.05512	9.05512	0	0	0	0	0	0	0	18.1759	8.26772	0	0	0	0	0	0	0	0	0	0	0	0	0	41.6995	0	0	8.26772	8.26772
SCc_SHK3Dr_&_BCc_SHKK	7.91592	0	0	0	0	12.0568	0	19.2141	0	0	11.0733	7.15731	0	0	0	0	0	0	0	0	3.91598	0	0	0	0	0	0	0	6.46017	23.4824	7.15731	0	0	0	0	0	0	0	0	0	0	0	7.91592	0	37.4447	0	0	7.15731	7.15731
BCc_SHKK	7.91592	0	0	0	0	12.0568	0	19.2141	0	0	11.0733	7.15731	0	0	0	0	0	0	0	0	3.91598	0	0	0	0	0	0	0	6.46017	23.4824	7.15731	0	0	0	0	0	0	0	0	0	0	0	7.91592	0	37.4447	0	0	7.15731	7.15731
SCc_SHK3Dr_&_BCc_SHKK_&_SCc_ANS	7.48663	0	0	0	0	10.4226	0	13.3525	0	0	8.79881	2.92994	0	0	0	0	0	0	0	0	5.86887	5.86887	0	0	0	0	0	0	0	16.8925	2.92994	0	0	0	0	0	0	0	0	0	0	0	7.48663	0	25.0813	0	0	2.92994	2.92994
BCc_SHKK_&_SCc_ANS	7.48663	0	0	0	0	10.4226	0	13.3525	0	0	8.79881	2.92994	0	0	0	0	0	0	0	0	5.86887	5.86887	0	0	0	0	0	0	15.5923	16.8925	2.92994	0	0	0	0	0	0	0	0	0	0	0	7.48663	0	25.0813	0	0	2.92994	2.92994
SCc_SHK3Dr_&_BCc_ANS	7.14924	0	0	0	0	16.9794	0	21.0903	0	0	10.1877	4.11081	0	0	0	0	0	0	0	0	6.07685	-1.07239	0	0	0	0	0	0	0	23.9053	4.11081	0	0	0	0	0	0	0	0	0	0	0	7.14924	0	35.3887	0	0	4.11081	4.11081
SCc_SHK3Dr_&_BCc_SHKK_&_BCc_ANS	7.14924	0	0	0	0	16.9794	0	21.0903	0	0	10.1877	4.11081	0	0	0	0	0	0	0	0	6.07685	-1.07239	0	0	0	0	0	0	18.0071	23.9053	4.11081	0	0	0	0	0	0	0	0	0	0	0	7.14924	0	35.3887	0	0	4.11081	4.11081
BCc_SHKK_&_BCc_ANS	7.14924	0	0	0	0	16.9794	0	21.0903	0	0	10.1877	4.11081	0	0	0	0	0	0	0	0	6.07685	-1.07239	0	0	0	0	0	0	18.0071	23.9053	4.11081	0	0	0	0	0	0	0	0	0	0	0	7.14924	0	35.3887	0	0	4.11081	4.11081
BCc_ANS	7.14924	0	0	0	0	16.9794	0	21.0903	0	0	10.1877	4.11081	0	0	0	0	0	0	0	0	6.07685	-1.07239	0	0	0	0	0	0	0	23.9053	4.11081	0	0	0	0	0	0	0	0	0	0	0	7.14924	0	35.3887	0	0	4.11081	4.11081
SCc_SHK3Dr_&_BCc_ANS_&_BCc_TRPS3	7.12695	0	0	0	0	17.9659	0	21.0839	0	0	10.245	3.11804	0	0	0	0	0	0	0	0	7.12695	0	0	0	0	0	0	0	0	23.6451	3.11804	0	0	0	0	0	0	0	0	0	0	0	7.12695	0	34.4469	0	0	3.11804	3.11804
BCc_ANS_&_BCc_TRPS3	7.12695	0	0	0	0	17.9659	0	21.0839	0	0	10.245	3.11804	0	0	0	0	0	0	0	0	7.12695	0	0	0	0	0	0	0	0	23.6451	3.11804	0	0	0	0	0	0	0	0	0	0	0	7.12695	0	34.4469	0	0	3.11804	3.11804
SCc_SHK3Dr_&_BCc_SHKK_&_BCc_ANS_&_BCc_TRPS3	7.12695	0	0	0	0	17.9659	0	21.0839	0	0	10.245	3.11804	0	0	0	0	0	0	0	0	7.12695	0	0	0	0	0	0	0	21.7149	23.6451	3.11804	0	0	0	0	0	0	0	0	0	0	0	7.12695	0	34.4469	0	0	3.11804	3.11804
SCc_SHK3Dr_&_BCc_SHKK_&_BCc_TRPS3	7.12695	0	0	0	0	17.9659	0	21.0839	0	0	10.245	3.11804	0	0	0	0	0	0	0	0	7.12695	0	0	0	0	0	0	0	21.7149	23.6451	3.11804	0	0	0	0	0	0	0	0	0	0	0	7.12695	0	34.4469	0	0	3.11804	3.11804
BCc_SHKK_&_BCc_TRPS3	7.12695	0	0	0	0	17.9659	0	21.0839	0	0	10.245	3.11804	0	0	0	0	0	0	0	0	7.12695	0	0	0	0	0	0	0	21.7149	23.6451	3.11804	0	0	0	0	0	0	0	0	0	0	0	7.12695	0	34.4469	0	0	3.11804	3.11804
BCc_SHKK_&_BCc_ANS_&_BCc_TRPS3	7.12695	0	0	0	0	17.9659	0	21.0839	0	0	10.245	3.11804	0	0	0	0	0	0	0	0	7.12695	0	0	0	0	0	0	0	21.7149	23.6451	3.11804	0	0	0	0	0	0	0	0	0	0	0	7.12695	0	34.4469	0	0	3.11804	3.11804
BCc_SHKK_&_SCc_ANS_&_BCc_TRPS3	7.08226	0	0	0	0	11.3857	0	12.6399	0	0	8.33641	1.25415	0	0	0	0	0	0	0	0	7.08226	7.08226	0	0	0	0	0	0	20.4537	15.6092	1.25415	0	0	0	0	0	0	0	0	0	0	0	7.08226	0	22.2304	0	0	1.25415	1.25415
SCc_SHK3Dr_&_BCc_SHKK_&_SCc_ANS_&_BCc_TRPS3	7.08226	0	0	0	0	11.3857	0	12.6399	0	0	8.33641	1.25415	0	0	0	0	0	0	0	0	7.08226	7.08226	0	0	0	0	0	0	20.4537	15.6092	1.25415	0	0	0	0	0	0	0	0	0	0	0	7.08226	0	22.2304	0	0	1.25415	1.25415
BCc_SHK3Dr_&_BCc_SHKK	6.97984	0	0	0	0	23.1116	0	29.8043	0	0	7.24059	6.69274	0	0	0	0	0	0	0	0	0.547851	0	0	0	0	0	0	0	47.1857	36.6439	6.69274	0	0	0	0	0	0	0	0	0	0	0	6.97984	0	47.2276	0	0	6.69274	6.69274
BCc_SHK3Dr	6.97984	0	0	0	0	23.1116	0	29.8043	0	0	7.24059	6.69274	0	0	0	0	0	0	0	0	0.547851	0	0	0	0	0	0	0	47.1857	36.6439	6.69274	0	0	0	0	0	0	0	0	0	0	0	6.97984	0	47.2276	0	0	6.69274	6.69274
BCc_SHK3Dr_&_SCc_ANS	6.93069	0	0	0	0	22.7626	0	28.8945	0	0	6.95565	6.13196	0	0	0	0	0	0	0	0	0.823696	0.823696	0	0	0	0	0	0	48.0697	35.6255	6.13196	0	0	0	0	0	0	0	0	0	0	0	6.93069	0	45.4475	0	0	6.13196	6.13196
BCc_SHK3Dr_&_BCc_SHKK_&_SCc_ANS	6.93069	0	0	0	0	22.7626	0	28.8945	0	0	6.95565	6.13196	0	0	0	0	0	0	0	0	0.823696	0.823696	0	0	0	0	0	0	48.0697	35.6255	6.13196	0	0	0	0	0	0	0	0	0	0	0	6.93069	0	45.4475	0	0	6.13196	6.13196
SCc_TRPS3	6.76957	0	0	0	0	16.5148	0	28.2314	0	0	11.7166	11.7166	0	0	0	0	0	0	0	0	0	-4.53785	0	0	0	0	0	0	13.7251	33.9967	11.7166	0	0	0	0	0	0	0	0	0	0	0	4.53785	0	53.9334	0	0	11.7166	11.7166
BCc_SHK3Dr_&_SCc_SHKK	6.76329	0	0	0	0	16.1125	0	24.3454	0	0	11.1558	8.23286	0	0	0	0	0	0	0	0	2.92291	2.92291	0	0	0	0	0	0	26.7801	28.9398	8.23286	0	0	0	0	0	0	0	0	0	0	0	0	0	47.1157	0	0	8.23286	8.23286
BCc_SHK3Dr_&_SCc_SHKK_&_SCc_ANS	6.76329	0	0	0	0	16.1125	0	24.3454	0	0	11.1558	8.23286	0	0	0	0	0	0	0	0	2.92291	2.92291	0	0	0	0	0	0	26.7801	28.9398	8.23286	0	0	0	0	0	0	0	0	0	0	0	0	0	47.1157	0	0	8.23286	8.23286
BCc_SHK3Dr_&_BCc_SHKK_&_SCc_TRPS3	6.69014	0	0	0	0	21.8897	0	29.6362	0	0	7.74648	7.74648	0	0	0	0	0	0	0	0	0	-1.05634	0	0	0	0	0	0	41.5053	36.4583	7.74648	0	0	0	0	0	0	0	0	0	0	0	6.69014	0	48.4742	0	0	7.74648	7.74648
BCc_SHKK_&_SCc_TRPS3	6.69014	0	0	0	0	21.8897	0	29.6362	0	0	7.74648	7.74648	0	0	0	0	0	0	0	0	0	-1.05634	0	0	0	0	0	0	41.5053	36.4583	7.74648	0	0	0	0	0	0	0	0	0	0	0	6.69014	0	48.4742	0	0	7.74648	7.74648
BCc_SHK3Dr_&_SCc_TRPS3	6.69014	0	0	0	0	21.8897	0	29.6362	0	0	7.74648	7.74648	0	0	0	0	0	0	0	0	0	-1.05634	0	0	0	0	0	0	0	36.4583	7.74648	0	0	0	0	0	0	0	0	0	0	0	6.69014	0	48.4742	0	0	7.74648	7.74648
SCc_ANS_&_SCc_TRPS3	6.48649	0	0	0	0	20.1802	0	27.7477	0	0	7.56757	7.56757	0	0	0	0	0	0	0	0	0	0	0	0	0	0	0	0	39.1892	34.5045	7.56757	0	0	0	0	0	0	0	0	0	0	0	6.48649	0	46.1261	0	0	7.56757	7.56757
BCc_SHK3Dr_&_SCc_ANS_&_SCc_TRPS3	6.48649	0	0	0	0	20.1802	0	27.7477	0	0	7.56757	7.56757	0	0	0	0	0	0	0	0	0	0	0	0	0	0	0	0	39.1892	34.5045	7.56757	0	0	0	0	0	0	0	0	0	0	0	6.48649	0	46.1261	0	0	7.56757	7.56757
BCc_SHKK_&_SCc_ANS_&_SCc_TRPS3	6.48649	0	0	0	0	20.1802	0	27.7477	0	0	7.56757	7.56757	0	0	0	0	0	0	0	0	0	0	0	0	0	0	0	0	39.1892	34.5045	7.56757	0	0	0	0	0	0	0	0	0	0	0	6.48649	0	46.1261	0	0	7.56757	7.56757
BCc_SHK3Dr_&_BCc_SHKK_&_SCc_ANS_&_SCc_TRPS3	6.48649	0	0	0	0	20.1802	0	27.7477	0	0	7.56757	7.56757	0	0	0	0	0	0	0	0	0	0	0	0	0	0	0	0	39.1892	34.5045	7.56757	0	0	0	0	0	0	0	0	0	0	0	6.48649	0	46.1261	0	0	7.56757	7.56757
SCc_SHKK_&_BCc_ANS	6.43898	0	0	0	0	10.9202	0	18.1423	0	0	13.6611	7.2221	0	0	0	0	0	0	0	0	6.43898	0	0	0	0	0	0	0	0	19.1429	7.2221	0	0	0	0	0	0	0	0	0	0	0	0	0	39.0255	0	0	7.2221	7.2221
SCc_SHK3Dr_&_SCc_SHKK_&_BCc_ANS	6.43898	0	0	0	0	10.9202	0	18.1423	0	0	13.6611	7.2221	0	0	0	0	0	0	0	0	6.43898	0	0	0	0	0	0	0	0	19.1429	7.2221	0	0	0	0	0	0	0	0	0	0	0	0	0	39.0255	0	0	7.2221	7.2221
SCc_SHKK_&_BCc_ANS_&_BCc_TRPS3	6.43898	0	0	0	0	10.9202	0	18.1423	0	0	13.6611	7.2221	0	0	0	0	0	0	0	0	6.43898	0	0	0	0	0	0	0	0	19.1429	7.2221	0	0	0	0	0	0	0	0	0	0	0	0	0	39.0255	0	0	7.2221	7.2221
SCc_SHK3Dr_&_SCc_SHKK_&_BCc_ANS_&_BCc_TRPS3	6.43898	0	0	0	0	10.9202	0	18.1423	0	0	13.6611	7.2221	0	0	0	0	0	0	0	0	6.43898	0	0	0	0	0	0	0	0	19.1429	7.2221	0	0	0	0	0	0	0	0	0	0	0	0	0	39.0255	0	0	7.2221	7.2221
BCc_ANS_&_SCc_TRPS3	6.22405	0	0	0	0	12.3803	0	23.3122	0	0	10.9319	10.9319	0	0	0	0	0	0	0	0	0	-6.22405	0	0	0	0	0	0	0	28.1376	10.9319	0	0	0	0	0	0	0	0	0	0	0	6.22405	0	45.8912	0	0	10.9319	10.9319
BCc_SHKK_&_BCc_ANS_&_SCc_TRPS3	6.22405	0	0	0	0	12.3803	0	23.3122	0	0	10.9319	10.9319	0	0	0	0	0	0	0	0	0	-6.22405	0	0	0	0	0	0	0	28.1376	10.9319	0	0	0	0	0	0	0	0	0	0	0	6.22405	0	45.8912	0	0	10.9319	10.9319
BCc_SHK3Dr_&_SCc_ANS_&_BCc_TRPS3	6.18988	0	0	0	0	18.6254	0	21.553	0	0	9.11752	2.92765	0	0	0	0	0	0	0	0	6.18988	6.18988	0	0	0	0	0	0	40.6943	24.6062	2.92765	0	0	0	0	0	0	0	0	0	0	0	0	0	36.6932	0	0	2.92765	2.92765
BCc_SHK3Dr_&_SCc_SHKK_&_SCc_ANS_&_BCc_TRPS3	6.18988	0	0	0	0	18.6254	0	21.553	0	0	9.11752	2.92765	0	0	0	0	0	0	0	0	6.18988	6.18988	0	0	0	0	0	0	40.6943	24.6062	2.92765	0	0	0	0	0	0	0	0	0	0	0	0	0	36.6932	0	0	2.92765	2.92765
BCc_SHK3Dr_&_SCc_SHKK_&_BCc_TRPS3	6.18988	0	0	0	0	18.6254	0	21.553	0	0	9.11752	2.92765	0	0	0	0	0	0	0	0	6.18988	6.18988	0	0	0	0	0	0	40.6943	24.6062	2.92765	0	0	0	0	0	0	0	0	0	0	0	0	0	36.6932	0	0	2.92765	2.92765
BCc_SHK3Dr_&_BCc_TRPS3	6.18988	0	0	0	0	18.6254	0	21.553	0	0	9.11752	2.92765	0	0	0	0	0	0	0	0	6.18988	6.18988	0	0	0	0	0	0	40.6943	24.6062	2.92765	0	0	0	0	0	0	0	0	0	0	0	0	0	36.6932	0	0	2.92765	2.92765
BCc_SHK3Dr_&_BCc_SHKK_&_BCc_ANS_&_BCc_TRPS3	6.06061	0	0	0	0	31.3131	0	31.3131	0	0	6.06061	0	0	0	0	0	0	0	0	0	6.06061	0	0	0	0	0	0	0	67.4242	35.101	0	0	0	0	0	0	0	0	0	0	0	0	6.06061	0	40.404	0	0	0	0
BCc_SHK3Dr_&_BCc_SHKK_&_BCc_TRPS3	6.06061	0	0	0	0	31.3131	0	31.3131	0	0	6.06061	0	0	0	0	0	0	0	0	0	6.06061	0	0	0	0	0	0	0	67.4242	35.101	0	0	0	0	0	0	0	0	0	0	0	0	6.06061	0	40.404	0	0	0	0
BCc_SHK3Dr_&_BCc_ANS	6.06061	0	0	0	0	31.3131	0	31.3131	0	0	6.06061	0	0	0	0	0	0	0	0	0	6.06061	0	0	0	0	0	0	0	67.4242	35.101	0	0	0	0	0	0	0	0	0	0	0	0	6.06061	0	40.404	0	0	0	0
BCc_SHK3Dr_&_BCc_SHKK_&_BCc_ANS	6.06061	0	0	0	0	31.3131	0	31.3131	0	0	6.06061	0	0	0	0	0	0	0	0	0	6.06061	0	0	0	0	0	0	0	67.4242	35.101	0	0	0	0	0	0	0	0	0	0	0	0	6.06061	0	40.404	0	0	0	0
BCc_SHK3Dr_&_BCc_ANS_&_BCc_TRPS3	6.06061	0	0	0	0	31.3131	0	31.3131	0	0	6.06061	0	0	0	0	0	0	0	0	0	6.06061	0	0	0	0	0	0	0	67.4242	35.101	0	0	0	0	0	0	0	0	0	0	0	0	6.06061	0	40.404	0	0	0	0
SCc_SHK3Dr_&_BCc_SHKK_&_BCc_ANS_&_SCc_TRPS3	5.85652	0	0	0	0	11.6886	0	22.5232	0	0	10.8346	10.8346	0	0	0	0	0	0	0	0	0	-5.85652	0	0	0	0	0	0	0	26.6959	10.8346	0	0	0	0	0	0	0	0	0	0	0	5.85652	0	44.1923	0	0	10.8346	10.8346
SCc_SHK3Dr_&_SCc_TRPS3	5.85652	0	0	0	0	11.6886	0	22.5232	0	0	10.8346	10.8346	0	0	0	0	0	0	0	0	0	-5.85652	0	0	0	0	0	0	0	26.6959	10.8346	0	0	0	0	0	0	0	0	0	0	0	5.85652	0	44.1923	0	0	10.8346	10.8346
SCc_SHK3Dr_&_BCc_ANS_&_SCc_TRPS3	5.85652	0	0	0	0	11.6886	0	22.5232	0	0	10.8346	10.8346	0	0	0	0	0	0	0	0	0	-5.85652	0	0	0	0	0	0	0	26.6959	10.8346	0	0	0	0	0	0	0	0	0	0	0	5.85652	0	44.1923	0	0	10.8346	10.8346
SCc_SHK3Dr_&_BCc_SHKK_&_SCc_TRPS3	5.85652	0	0	0	0	11.6886	0	22.5232	0	0	10.8346	10.8346	0	0	0	0	0	0	0	0	0	-5.85652	0	0	0	0	0	0	0	26.6959	10.8346	0	0	0	0	0	0	0	0	0	0	0	5.85652	0	44.1923	0	0	10.8346	10.8346
BCc_SHK3Dr_&_BCc_SHKK_&_SCc_ANS_&_BCc_TRPS3	5.71429	0	0	0	0	23.8095	0	23.8095	0	0	5.71429	0	0	0	0	0	0	0	0	0	5.71429	5.71429	0	0	0	0	0	0	58.5714	28.0952	0	0	0	0	0	0	0	0	0	0	0	0	5.71429	0	32.381	0	0	0	0
BCc_SHK3Dr_&_BCc_ANS_&_SCc_TRPS3	5.54042	0	0	0	0	22.2676	0	30.2604	0	0	7.99273	7.99273	0	0	0	0	0	0	0	0	0	-5.54042	0	0	0	0	0	0	0	35.7213	7.99273	0	0	0	0	0	0	0	0	0	0	0	5.54042	0	49.016	0	0	7.99273	7.99273
BCc_SHK3Dr_&_BCc_SHKK_&_BCc_ANS_&_SCc_TRPS3	5.54042	0	0	0	0	22.2676	0	30.2604	0	0	7.99273	7.99273	0	0	0	0	0	0	0	0	0	-5.54042	0	0	0	0	0	0	34.1167	35.7213	7.99273	0	0	0	0	0	0	0	0	0	0	0	5.54042	0	49.016	0	0	7.99273	7.99273
BCc_SHK3Dr_&_SCc_SHKK_&_SCc_ANS_&_SCc_TRPS3	5.43478	0	0	0	0	9.60145	0	21.558	0	0	11.9565	11.9565	0	0	0	0	0	0	0	0	0	0	0	0	0	0	0	0	0	26.5851	11.9565	0	0	0	0	0	0	0	0	0	0	0	0	0	48.1884	0	0	11.9565	11.9565
SCc_SHKK_&_SCc_ANS_&_SCc_TRPS3	5.43478	0	0	0	0	9.60145	0	21.558	0	0	11.9565	11.9565	0	0	0	0	0	0	0	0	0	0	0	0	0	0	0	0	4.4837	26.5851	11.9565	0	0	0	0	0	0	0	0	0	0	0	0	0	48.1884	0	0	11.9565	11.9565
SCc_SHKK_&_SCc_TRPS3	5.43478	0	0	0	0	9.60145	0	21.558	0	0	11.9565	11.9565	0	0	0	0	0	0	0	0	0	0	0	0	0	0	0	0	4.4837	26.5851	11.9565	0	0	0	0	0	0	0	0	0	0	0	0	0	48.1884	0	0	11.9565	11.9565
BCc_SHK3Dr_&_SCc_SHKK_&_SCc_TRPS3	5.43478	0	0	0	0	9.60145	0	21.558	0	0	11.9565	11.9565	0	0	0	0	0	0	0	0	0	0	0	0	0	0	0	0	0	26.5851	11.9565	0	0	0	0	0	0	0	0	0	0	0	0	0	48.1884	0	0	11.9565	11.9565
SCc_SHK3Dr_&_SCc_SHKK_&_SCc_TRPS3	5.06971	0	0	0	0	7.54119	0	20.4689	0	0	12.9278	12.9278	0	0	0	0	0	0	0	0	0	0	0	0	0	0	0	0	0	23.7009	12.9278	0	0	0	0	0	0	0	0	0	0	0	0	0	46.3245	0	0	12.9278	12.9278
SCc_SHK3Dr_&_SCc_SHKK_&_SCc_ANS_&_SCc_TRPS3	5.06971	0	0	0	0	7.54119	0	20.4689	0	0	12.9278	12.9278	0	0	0	0	0	0	0	0	0	0	0	0	0	0	0	0	0	23.7009	12.9278	0	0	0	0	0	0	0	0	0	0	0	0	0	46.3245	0	0	12.9278	12.9278
SCc_SHK3Dr_&_SCc_ANS_&_SCc_TRPS3	5.06971	0	0	0	0	7.54119	0	20.4689	0	0	12.9278	12.9278	0	0	0	0	0	0	0	0	0	0	0	0	0	0	0	0	0	23.7009	12.9278	0	0	0	0	0	0	0	0	0	0	0	0	0	46.3245	0	0	12.9278	12.9278
SCc_SHK3Dr_&_BCc_SHKK_&_SCc_ANS_&_SCc_TRPS3	4.96894	0	0	0	0	6.10766	0	14.8033	0	0	8.69565	8.69565	0	0	0	0	0	0	0	0	0	0	0	0	0	0	0	0	0	18.8406	8.69565	0	0	0	0	0	0	0	0	0	0	0	4.96894	0	32.1946	0	0	8.69565	8.69565
SCc_SHKK_&_BCc_ANS_&_SCc_TRPS3	4.74713	0	0	0	0	10.7099	0	22.5254	0	0	11.8154	11.8154	0	0	0	0	0	0	0	0	0	-4.74713	0	0	0	0	0	0	0	25.7049	11.8154	0	0	0	0	0	0	0	0	0	0	0	0	0	47.2483	0	0	11.8154	11.8154
BCc_SHK3Dr_&_SCc_SHKK_&_BCc_ANS_&_BCc_TRPS3	4.73903	0	0	0	0	18.5719	0	22.0941	0	0	8.26129	3.52225	0	0	0	0	0	0	0	0	4.73903	0	0	0	0	0	0	0	31.7803	24.1595	3.52225	0	0	0	0	0	0	0	0	0	0	0	0	0	36.2472	0	0	3.52225	3.52225
BCc_SHK3Dr_&_SCc_SHKK_&_BCc_ANS	4.73903	0	0	0	0	18.5719	0	22.0941	0	0	8.26129	3.52225	0	0	0	0	0	0	0	0	4.73903	0	0	0	0	0	0	0	31.7803	24.1595	3.52225	0	0	0	0	0	0	0	0	0	0	0	0	0	36.2472	0	0	3.52225	3.52225
SCc_SHK3Dr_&_SCc_SHKK_&_BCc_ANS_&_SCc_TRPS3	4.61361	0	0	0	0	10.3998	0	22.6259	0	0	12.2261	12.2261	0	0	0	0	0	0	0	0	0	-4.61361	0	0	0	0	0	0	0	25.1057	12.2261	0	0	0	0	0	0	0	0	0	0	0	0	0	47.078	0	0	12.2261	12.2261
BCc_SHK3Dr_&_SCc_SHKK_&_BCc_ANS_&_SCc_TRPS3	4.50411	0	0	0	0	12.675	0	21.9431	0	0	9.26808	9.26808	0	0	0	0	0	0	0	0	0	-4.50411	0	0	0	0	0	0	0	25.3862	9.26808	0	0	0	0	0	0	0	0	0	0	0	0	0	42.7313	0	0	9.26808	9.26808
BCc_SHK3Dr_&_BCc_ANS_&_SCc_ANS_&_SCc_TRPS3	0	0	0	0	0	0	0	0	0	0	0	0	0	0	0	0	0	0	0	0	0	0	0	0	0	0	0	0	0	0	0	0	0	0	0	0	0	0	0	0	0	0	0	0	0	0	0	0	0
SCc_SHK3Dr_&_BCc_SHKK_&_SCc_SHKK_&_SCc_ANS	0	0	0	0	0	0	0	0	0	0	0	0	0	0	0	0	0	0	0	0	0	0	0	0	0	0	0	0	0	0	0	0	0	0	0	0	0	0	0	0	0	0	0	0	0	0	0	0	0
SCc_SHK3Dr_&_BCc_SHKK_&_SCc_SHKK_&_BCc_ANS	0	0	0	0	0	0	0	0	0	0	0	0	0	0	0	0	0	0	0	0	0	0	0	0	0	0	0	0	0	0	0	0	0	0	0	0	0	0	0	0	0	0	0	0	0	0	0	0	0
BCc_SHK3Dr_&_SCc_ANS_&_BCc_TRPS3_&_SCc_TRPS3	0	0	0	0	0	0	0	0	0	0	0	0	0	0	0	0	0	0	0	0	0	0	0	0	0	0	0	0	0	0	0	0	0	0	0	0	0	0	0	0	0	0	0	0	0	0	0	0	0
BCc_SHK3Dr_&_BCc_ANS_&_BCc_TRPS3_&_SCc_TRPS3	0	0	0	0	0	0	0	0	0	0	0	0	0	0	0	0	0	0	0	0	0	0	0	0	0	0	0	0	0	0	0	0	0	0	0	0	0	0	0	0	0	0	0	0	0	0	0	0	0
BCc_SHKK_&_SCc_SHKK_&_BCc_ANS_&_BCc_TRPS3	0	0	0	0	0	0	0	0	0	0	0	0	0	0	0	0	0	0	0	0	0	0	0	0	0	0	0	0	0	0	0	0	0	0	0	0	0	0	0	0	0	0	0	0	0	0	0	0	0
BCc_SHK3Dr_&_BCc_ANS_&_SCc_ANS_&_BCc_TRPS3	0	0	0	0	0	0	0	0	0	0	0	0	0	0	0	0	0	0	0	0	0	0	0	0	0	0	0	0	0	0	0	0	0	0	0	0	0	0	0	0	0	0	0	0	0	0	0	0	0
SCc_SHK3Dr_&_BCc_SHKK_&_SCc_SHKK_&_SCc_TRPS3	0	0	0	0	0	0	0	0	0	0	0	0	0	0	0	0	0	0	0	0	0	0	0	0	0	0	0	0	0	0	0	0	0	0	0	0	0	0	0	0	0	0	0	0	0	0	0	0	0
BCc_SHK3Dr_&_SCc_SHKK_&_BCc_TRPS3_&_SCc_TRPS3	0	0	0	0	0	0	0	0	0	0	0	0	0	0	0	0	0	0	0	0	0	0	0	0	0	0	0	0	0	0	0	0	0	0	0	0	0	0	0	0	0	0	0	0	0	0	0	0	0
BCc_SHKK_&_BCc_ANS_&_SCc_ANS_&_SCc_TRPS3	0	0	0	0	0	0	0	0	0	0	0	0	0	0	0	0	0	0	0	0	0	0	0	0	0	0	0	0	0	0	0	0	0	0	0	0	0	0	0	0	0	0	0	0	0	0	0	0	0
SCc_SHKK_&_BCc_ANS_&_BCc_TRPS3_&_SCc_TRPS3	0	0	0	0	0	0	0	0	0	0	0	0	0	0	0	0	0	0	0	0	0	0	0	0	0	0	0	0	0	0	0	0	0	0	0	0	0	0	0	0	0	0	0	0	0	0	0	0	0
BCc_SHK3Dr_&_SCc_SHKK_&_BCc_ANS_&_SCc_ANS	0	0	0	0	0	0	0	0	0	0	0	0	0	0	0	0	0	0	0	0	0	0	0	0	0	0	0	0	0	0	0	0	0	0	0	0	0	0	0	0	0	0	0	0	0	0	0	0	0
BCc_SHK3Dr_&_BCc_SHKK_&_BCc_TRPS3_&_SCc_TRPS3	0	0	0	0	0	0	0	0	0	0	0	0	0	0	0	0	0	0	0	0	0	0	0	0	0	0	0	0	0	0	0	0	0	0	0	0	0	0	0	0	0	0	0	0	0	0	0	0	0
SCc_SHKK_&_SCc_ANS_&_BCc_TRPS3_&_SCc_TRPS3	0	0	0	0	0	0	0	0	0	0	0	0	0	0	0	0	0	0	0	0	0	0	0	0	0	0	0	0	0	0	0	0	0	0	0	0	0	0	0	0	0	0	0	0	0	0	0	0	0
SCc_SHK3Dr_&_BCc_SHKK_&_SCc_SHKK_&_BCc_TRPS3	0	0	0	0	0	0	0	0	0	0	0	0	0	0	0	0	0	0	0	0	0	0	0	0	0	0	0	0	0	0	0	0	0	0	0	0	0	0	0	0	0	0	0	0	0	0	0	0	0
BCc_SHKK_&_SCc_SHKK_&_SCc_ANS_&_BCc_TRPS3	0	0	0	0	0	0	0	0	0	0	0	0	0	0	0	0	0	0	0	0	0	0	0	0	0	0	0	0	0	0	0	0	0	0	0	0	0	0	0	0	0	0	0	0	0	0	0	0	0
SCc_SHK3Dr_&_BCc_SHKK_&_BCc_ANS_&_SCc_ANS	0	0	0	0	0	0	0	0	0	0	0	0	0	0	0	0	0	0	0	0	0	0	0	0	0	0	0	0	0	0	0	0	0	0	0	0	0	0	0	0	0	0	0	0	0	0	0	0	0
SCc_SHKK_&_BCc_ANS_&_SCc_ANS_&_SCc_TRPS3	0	0	0	0	0	0	0	0	0	0	0	0	0	0	0	0	0	0	0	0	0	0	0	0	0	0	0	0	0	0	0	0	0	0	0	0	0	0	0	0	0	0	0	0	0	0	0	0	0
BCc_SHKK_&_SCc_SHKK_&_BCc_ANS_&_SCc_ANS	0	0	0	0	0	0	0	0	0	0	0	0	0	0	0	0	0	0	0	0	0	0	0	0	0	0	0	0	0	0	0	0	0	0	0	0	0	0	0	0	0	0	0	0	0	0	0	0	0
SCc_SHK3Dr_&_SCc_ANS_&_BCc_TRPS3_&_SCc_TRPS3	0	0	0	0	0	0	0	0	0	0	0	0	0	0	0	0	0	0	0	0	0	0	0	0	0	0	0	0	0	0	0	0	0	0	0	0	0	0	0	0	0	0	0	0	0	0	0	0	0
SCc_SHK3Dr_&_BCc_ANS_&_BCc_TRPS3_&_SCc_TRPS3	0	0	0	0	0	0	0	0	0	0	0	0	0	0	0	0	0	0	0	0	0	0	0	0	0	0	0	0	0	0	0	0	0	0	0	0	0	0	0	0	0	0	0	0	0	0	0	0	0
SCc_SHK3Dr_&_BCc_ANS_&_SCc_ANS_&_SCc_TRPS3	0	0	0	0	0	0	0	0	0	0	0	0	0	0	0	0	0	0	0	0	0	0	0	0	0	0	0	0	0	0	0	0	0	0	0	0	0	0	0	0	0	0	0	0	0	0	0	0	0
SCc_SHK3Dr_&_BCc_ANS_&_SCc_ANS_&_BCc_TRPS3	0	0	0	0	0	0	0	0	0	0	0	0	0	0	0	0	0	0	0	0	0	0	0	0	0	0	0	0	0	0	0	0	0	0	0	0	0	0	0	0	0	0	0	0	0	0	0	0	0
SCc_SHK3Dr_&_SCc_SHKK_&_BCc_TRPS3_&_SCc_TRPS3	0	0	0	0	0	0	0	0	0	0	0	0	0	0	0	0	0	0	0	0	0	0	0	0	0	0	0	0	0	0	0	0	0	0	0	0	0	0	0	0	0	0	0	0	0	0	0	0	0
BCc_SHKK_&_SCc_ANS_&_BCc_TRPS3_&_SCc_TRPS3	0	0	0	0	0	0	0	0	0	0	0	0	0	0	0	0	0	0	0	0	0	0	0	0	0	0	0	0	0	0	0	0	0	0	0	0	0	0	0	0	0	0	0	0	0	0	0	0	0
BCc_SHKK_&_BCc_ANS_&_BCc_TRPS3_&_SCc_TRPS3	0	0	0	0	0	0	0	0	0	0	0	0	0	0	0	0	0	0	0	0	0	0	0	0	0	0	0	0	0	0	0	0	0	0	0	0	0	0	0	0	0	0	0	0	0	0	0	0	0
BCc_SHK3Dr_&_SCc_SHK3Dr	0	0	0	0	0	0	0	0	0	0	0	0	0	0	0	0	0	0	0	0	0	0	0	0	0	0	0	0	0	0	0	0	0	0	0	0	0	0	0	0	0	0	0	0	0	0	0	0	0
SCc_SHKK_&_BCc_ANS_&_SCc_ANS_&_BCc_TRPS3	0	0	0	0	0	0	0	0	0	0	0	0	0	0	0	0	0	0	0	0	0	0	0	0	0	0	0	0	0	0	0	0	0	0	0	0	0	0	0	0	0	0	0	0	0	0	0	0	0
BCc_SHKK_&_SCc_SHKK_&_BCc_ANS_&_SCc_TRPS3	0	0	0	0	0	0	0	0	0	0	0	0	0	0	0	0	0	0	0	0	0	0	0	0	0	0	0	0	0	0	0	0	0	0	0	0	0	0	0	0	0	0	0	0	0	0	0	0	0
BCc_SHKK_&_SCc_SHKK_&_BCc_TRPS3_&_SCc_TRPS3	0	0	0	0	0	0	0	0	0	0	0	0	0	0	0	0	0	0	0	0	0	0	0	0	0	0	0	0	0	0	0	0	0	0	0	0	0	0	0	0	0	0	0	0	0	0	0	0	0
SCc_SHK3Dr_&_SCc_SHKK_&_BCc_ANS_&_SCc_ANS	0	0	0	0	0	0	0	0	0	0	0	0	0	0	0	0	0	0	0	0	0	0	0	0	0	0	0	0	0	0	0	0	0	0	0	0	0	0	0	0	0	0	0	0	0	0	0	0	0
SCc_SHK3Dr_&_BCc_SHKK_&_BCc_TRPS3_&_SCc_TRPS3	0	0	0	0	0	0	0	0	0	0	0	0	0	0	0	0	0	0	0	0	0	0	0	0	0	0	0	0	0	0	0	0	0	0	0	0	0	0	0	0	0	0	0	0	0	0	0	0	0
BCc_SHKK_&_SCc_SHKK_&_SCc_ANS_&_SCc_TRPS3	0	0	0	0	0	0	0	0	0	0	0	0	0	0	0	0	0	0	0	0	0	0	0	0	0	0	0	0	0	0	0	0	0	0	0	0	0	0	0	0	0	0	0	0	0	0	0	0	0
BCc_SHKK_&_BCc_ANS_&_SCc_ANS_&_BCc_TRPS3	0	0	0	0	0	0	0	0	0	0	0	0	0	0	0	0	0	0	0	0	0	0	0	0	0	0	0	0	0	0	0	0	0	0	0	0	0	0	0	0	0	0	0	0	0	0	0	0	0
BCc_SHK3Dr_&_SCc_SHK3Dr_&_BCc_ANS_&_SCc_TRPS3	0	0	0	0	0	0	0	0	0	0	0	0	0	0	0	0	0	0	0	0	0	0	0	0	0	0	0	0	0	0	0	0	0	0	0	0	0	0	0	0	0	0	0	0	0	0	0	0	0
BCc_SHK3Dr_&_BCc_SHKK_&_BCc_ANS_&_SCc_ANS	0	0	0	0	0	0	0	0	0	0	0	0	0	0	0	0	0	0	0	0	0	0	0	0	0	0	0	0	0	0	0	0	0	0	0	0	0	0	0	0	0	0	0	0	0	0	0	0	0
BCc_TRPS3_&_SCc_TRPS3	0	0	0	0	0	0	0	0	0	0	0	0	0	0	0	0	0	0	0	0	0	0	0	0	0	0	0	0	0	0	0	0	0	0	0	0	0	0	0	0	0	0	0	0	0	0	0	0	0
BCc_SHKK_&_SCc_SHKK	0	0	0	0	0	0	0	0	0	0	0	0	0	0	0	0	0	0	0	0	0	0	0	0	0	0	0	0	0	0	0	0	0	0	0	0	0	0	0	0	0	0	0	0	0	0	0	0	0
BCc_SHKK_&_BCc_ANS_&_SCc_ANS	0	0	0	0	0	0	0	0	0	0	0	0	0	0	0	0	0	0	0	0	0	0	0	0	0	0	0	0	0	0	0	0	0	0	0	0	0	0	0	0	0	0	0	0	0	0	0	0	0
BCc_SHKK_&_SCc_SHKK_&_SCc_TRPS3	0	0	0	0	0	0	0	0	0	0	0	0	0	0	0	0	0	0	0	0	0	0	0	0	0	0	0	0	0	0	0	0	0	0	0	0	0	0	0	0	0	0	0	0	0	0	0	0	0
BCc_SHKK_&_SCc_SHKK_&_BCc_TRPS3	0	0	0	0	0	0	0	0	0	0	0	0	0	0	0	0	0	0	0	0	0	0	0	0	0	0	0	0	0	0	0	0	0	0	0	0	0	0	0	0	0	0	0	0	0	0	0	0	0
BCc_SHKK_&_SCc_SHKK_&_SCc_ANS	0	0	0	0	0	0	0	0	0	0	0	0	0	0	0	0	0	0	0	0	0	0	0	0	0	0	0	0	0	0	0	0	0	0	0	0	0	0	0	0	0	0	0	0	0	0	0	0	0
BCc_SHKK_&_SCc_SHKK_&_BCc_ANS	0	0	0	0	0	0	0	0	0	0	0	0	0	0	0	0	0	0	0	0	0	0	0	0	0	0	0	0	0	0	0	0	0	0	0	0	0	0	0	0	0	0	0	0	0	0	0	0	0
SCc_SHK3Dr_&_BCc_TRPS3_&_SCc_TRPS3	0	0	0	0	0	0	0	0	0	0	0	0	0	0	0	0	0	0	0	0	0	0	0	0	0	0	0	0	0	0	0	0	0	0	0	0	0	0	0	0	0	0	0	0	0	0	0	0	0
BCc_ANS_&_SCc_ANS	0	0	0	0	0	0	0	0	0	0	0	0	0	0	0	0	0	0	0	0	0	0	0	0	0	0	0	0	0	0	0	0	0	0	0	0	0	0	0	0	0	0	0	0	0	0	0	0	0
SCc_SHK3Dr_&_BCc_ANS_&_SCc_ANS	0	0	0	0	0	0	0	0	0	0	0	0	0	0	0	0	0	0	0	0	0	0	0	0	0	0	0	0	0	0	0	0	0	0	0	0	0	0	0	0	0	0	0	0	0	0	0	0	0
BCc_SHK3Dr_&_SCc_SHK3Dr_&_BCc_SHKK	0	0	0	0	0	0	0	0	0	0	0	0	0	0	0	0	0	0	0	0	0	0	0	0	0	0	0	0	0	0	0	0	0	0	0	0	0	0	0	0	0	0	0	0	0	0	0	0	0
SCc_SHKK_&_BCc_ANS_&_SCc_ANS	0	0	0	0	0	0	0	0	0	0	0	0	0	0	0	0	0	0	0	0	0	0	0	0	0	0	0	0	0	0	0	0	0	0	0	0	0	0	0	0	0	0	0	0	0	0	0	0	0
BCc_SHK3Dr_&_SCc_SHK3Dr_&_SCc_SHKK	0	0	0	0	0	0	0	0	0	0	0	0	0	0	0	0	0	0	0	0	0	0	0	0	0	0	0	0	0	0	0	0	0	0	0	0	0	0	0	0	0	0	0	0	0	0	0	0	0
BCc_SHK3Dr_&_SCc_SHK3Dr_&_BCc_ANS	0	0	0	0	0	0	0	0	0	0	0	0	0	0	0	0	0	0	0	0	0	0	0	0	0	0	0	0	0	0	0	0	0	0	0	0	0	0	0	0	0	0	0	0	0	0	0	0	0
BCc_SHK3Dr_&_SCc_SHK3Dr_&_SCc_ANS	0	0	0	0	0	0	0	0	0	0	0	0	0	0	0	0	0	0	0	0	0	0	0	0	0	0	0	0	0	0	0	0	0	0	0	0	0	0	0	0	0	0	0	0	0	0	0	0	0
SCc_SHK3Dr_&_BCc_SHKK_&_SCc_SHKK	0	0	0	0	0	0	0	0	0	0	0	0	0	0	0	0	0	0	0	0	0	0	0	0	0	0	0	0	0	0	0	0	0	0	0	0	0	0	0	0	0	0	0	0	0	0	0	0	0
BCc_SHK3Dr_&_BCc_TRPS3_&_SCc_TRPS3	0	0	0	0	0	0	0	0	0	0	0	0	0	0	0	0	0	0	0	0	0	0	0	0	0	0	0	0	0	0	0	0	0	0	0	0	0	0	0	0	0	0	0	0	0	0	0	0	0
BCc_SHK3Dr_&_SCc_SHK3Dr_&_BCc_TRPS3	0	0	0	0	0	0	0	0	0	0	0	0	0	0	0	0	0	0	0	0	0	0	0	0	0	0	0	0	0	0	0	0	0	0	0	0	0	0	0	0	0	0	0	0	0	0	0	0	0
BCc_SHK3Dr_&_BCc_ANS_&_SCc_ANS	0	0	0	0	0	0	0	0	0	0	0	0	0	0	0	0	0	0	0	0	0	0	0	0	0	0	0	0	0	0	0	0	0	0	0	0	0	0	0	0	0	0	0	0	0	0	0	0	0
BCc_SHK3Dr_&_SCc_SHK3Dr_&_SCc_TRPS3	0	0	0	0	0	0	0	0	0	0	0	0	0	0	0	0	0	0	0	0	0	0	0	0	0	0	0	0	0	0	0	0	0	0	0	0	0	0	0	0	0	0	0	0	0	0	0	0	0
BCc_SHK3Dr_&_BCc_SHKK_&_SCc_SHKK	0	0	0	0	0	0	0	0	0	0	0	0	0	0	0	0	0	0	0	0	0	0	0	0	0	0	0	0	0	0	0	0	0	0	0	0	0	0	0	0	0	0	0	0	0	0	0	0	0
BCc_SHKK_&_BCc_TRPS3_&_SCc_TRPS3	0	0	0	0	0	0	0	0	0	0	0	0	0	0	0	0	0	0	0	0	0	0	0	0	0	0	0	0	0	0	0	0	0	0	0	0	0	0	0	0	0	0	0	0	0	0	0	0	0
SCc_SHKK_&_BCc_TRPS3_&_SCc_TRPS3	0	0	0	0	0	0	0	0	0	0	0	0	0	0	0	0	0	0	0	0	0	0	0	0	0	0	0	0	0	0	0	0	0	0	0	0	0	0	0	0	0	0	0	0	0	0	0	0	0
BCc_SHK3Dr_&_BCc_SHKK_&_SCc_SHKK_&_SCc_TRPS3	0	0	0	0	0	0	0	0	0	0	0	0	0	0	0	0	0	0	0	0	0	0	0	0	0	0	0	0	0	0	0	0	0	0	0	0	0	0	0	0	0	0	0	0	0	0	0	0	0
BCc_SHK3Dr_&_SCc_SHK3Dr_&_SCc_SHKK_&_BCc_TRPS3	0	0	0	0	0	0	0	0	0	0	0	0	0	0	0	0	0	0	0	0	0	0	0	0	0	0	0	0	0	0	0	0	0	0	0	0	0	0	0	0	0	0	0	0	0	0	0	0	0
BCc_SHK3Dr_&_BCc_SHKK_&_SCc_SHKK_&_BCc_TRPS3	0	0	0	0	0	0	0	0	0	0	0	0	0	0	0	0	0	0	0	0	0	0	0	0	0	0	0	0	0	0	0	0	0	0	0	0	0	0	0	0	0	0	0	0	0	0	0	0	0
BCc_SHK3Dr_&_BCc_SHKK_&_SCc_SHKK_&_SCc_ANS	0	0	0	0	0	0	0	0	0	0	0	0	0	0	0	0	0	0	0	0	0	0	0	0	0	0	0	0	0	0	0	0	0	0	0	0	0	0	0	0	0	0	0	0	0	0	0	0	0
BCc_SHK3Dr_&_BCc_SHKK_&_SCc_SHKK_&_BCc_ANS	0	0	0	0	0	0	0	0	0	0	0	0	0	0	0	0	0	0	0	0	0	0	0	0	0	0	0	0	0	0	0	0	0	0	0	0	0	0	0	0	0	0	0	0	0	0	0	0	0
BCc_SHK3Dr_&_SCc_SHK3Dr_&_BCc_TRPS3_&_SCc_TRPS3	0	0	0	0	0	0	0	0	0	0	0	0	0	0	0	0	0	0	0	0	0	0	0	0	0	0	0	0	0	0	0	0	0	0	0	0	0	0	0	0	0	0	0	0	0	0	0	0	0
BCc_SHK3Dr_&_SCc_SHK3Dr_&_SCc_ANS_&_SCc_TRPS3	0	0	0	0	0	0	0	0	0	0	0	0	0	0	0	0	0	0	0	0	0	0	0	0	0	0	0	0	0	0	0	0	0	0	0	0	0	0	0	0	0	0	0	0	0	0	0	0	0
BCc_SHK3Dr_&_SCc_SHK3Dr_&_SCc_ANS_&_BCc_TRPS3	0	0	0	0	0	0	0	0	0	0	0	0	0	0	0	0	0	0	0	0	0	0	0	0	0	0	0	0	0	0	0	0	0	0	0	0	0	0	0	0	0	0	0	0	0	0	0	0	0
BCc_SHK3Dr_&_SCc_SHK3Dr_&_BCc_ANS_&_BCc_TRPS3	0	0	0	0	0	0	0	0	0	0	0	0	0	0	0	0	0	0	0	0	0	0	0	0	0	0	0	0	0	0	0	0	0	0	0	0	0	0	0	0	0	0	0	0	0	0	0	0	0
BCc_SHK3Dr_&_SCc_SHK3Dr_&_BCc_ANS_&_SCc_ANS	0	0	0	0	0	0	0	0	0	0	0	0	0	0	0	0	0	0	0	0	0	0	0	0	0	0	0	0	0	0	0	0	0	0	0	0	0	0	0	0	0	0	0	0	0	0	0	0	0
BCc_SHK3Dr_&_SCc_SHK3Dr_&_SCc_SHKK_&_SCc_TRPS3	0	0	0	0	0	0	0	0	0	0	0	0	0	0	0	0	0	0	0	0	0	0	0	0	0	0	0	0	0	0	0	0	0	0	0	0	0	0	0	0	0	0	0	0	0	0	0	0	0
BCc_SHK3Dr_&_SCc_SHK3Dr_&_SCc_SHKK_&_SCc_ANS	0	0	0	0	0	0	0	0	0	0	0	0	0	0	0	0	0	0	0	0	0	0	0	0	0	0	0	0	0	0	0	0	0	0	0	0	0	0	0	0	0	0	0	0	0	0	0	0	0
BCc_ANS_&_SCc_ANS_&_BCc_TRPS3	0	0	0	0	0	0	0	0	0	0	0	0	0	0	0	0	0	0	0	0	0	0	0	0	0	0	0	0	0	0	0	0	0	0	0	0	0	0	0	0	0	0	0	0	0	0	0	0	0
BCc_SHK3Dr_&_SCc_SHK3Dr_&_SCc_SHKK_&_BCc_ANS	0	0	0	0	0	0	0	0	0	0	0	0	0	0	0	0	0	0	0	0	0	0	0	0	0	0	0	0	0	0	0	0	0	0	0	0	0	0	0	0	0	0	0	0	0	0	0	0	0
BCc_SHK3Dr_&_SCc_SHK3Dr_&_BCc_SHKK_&_SCc_TRPS3	0	0	0	0	0	0	0	0	0	0	0	0	0	0	0	0	0	0	0	0	0	0	0	0	0	0	0	0	0	0	0	0	0	0	0	0	0	0	0	0	0	0	0	0	0	0	0	0	0
BCc_SHK3Dr_&_SCc_SHK3Dr_&_BCc_SHKK_&_BCc_TRPS3	0	0	0	0	0	0	0	0	0	0	0	0	0	0	0	0	0	0	0	0	0	0	0	0	0	0	0	0	0	0	0	0	0	0	0	0	0	0	0	0	0	0	0	0	0	0	0	0	0
BCc_SHK3Dr_&_SCc_SHK3Dr_&_BCc_SHKK_&_SCc_ANS	0	0	0	0	0	0	0	0	0	0	0	0	0	0	0	0	0	0	0	0	0	0	0	0	0	0	0	0	0	0	0	0	0	0	0	0	0	0	0	0	0	0	0	0	0	0	0	0	0
BCc_SHK3Dr_&_SCc_SHK3Dr_&_BCc_SHKK_&_BCc_ANS	0	0	0	0	0	0	0	0	0	0	0	0	0	0	0	0	0	0	0	0	0	0	0	0	0	0	0	0	0	0	0	0	0	0	0	0	0	0	0	0	0	0	0	0	0	0	0	0	0
BCc_SHK3Dr_&_SCc_SHK3Dr_&_BCc_SHKK_&_SCc_SHKK	0	0	0	0	0	0	0	0	0	0	0	0	0	0	0	0	0	0	0	0	0	0	0	0	0	0	0	0	0	0	0	0	0	0	0	0	0	0	0	0	0	0	0	0	0	0	0	0	0
SCc_ANS_&_BCc_TRPS3_&_SCc_TRPS3	0	0	0	0	0	0	0	0	0	0	0	0	0	0	0	0	0	0	0	0	0	0	0	0	0	0	0	0	0	0	0	0	0	0	0	0	0	0	0	0	0	0	0	0	0	0	0	0	0
BCc_ANS_&_BCc_TRPS3_&_SCc_TRPS3	0	0	0	0	0	0	0	0	0	0	0	0	0	0	0	0	0	0	0	0	0	0	0	0	0	0	0	0	0	0	0	0	0	0	0	0	0	0	0	0	0	0	0	0	0	0	0	0	0
BCc_ANS_&_SCc_ANS_&_SCc_TRPS3	0	0	0	0	0	0	0	0	0	0	0	0	0	0	0	0	0	0	0	0	0	0	0	0	0	0	0	0	0	0	0	0	0	0	0	0	0	0	0	0	0	0	0	0	0	0	0	0	0
BCc_ANS_&_SCc_ANS_&_BCc_TRPS3_&_SCc_TRPS3	0	0	0	0	0	0	0	0	0	0	0	0	0	0	0	0	0	0	0	0	0	0	0	0	0	0	0	0	0	0	0	0	0	0	0	0	0	0	0	0	0	0	0	0	0	0	0	0	0
[truncated: 538 more columns]

## Sheet: THF_experiment
ID	fOpt	SCc_4PASPt	SCc_8AONNt	SCc_A5PISO	SCc_ACCOACr	SCc_ACKr	SCc_ACOATA	SCc_ACt	SCc_ADCL	SCc_ADCS	SCc_ADK1	SCc_ADSK	SCc_ADSL1r	SCc_ADSS	SCc_AGMHE	SCc_4AMPMt	SCc_AKGt	SCc_ALAALAr	SCc_ALAt	SCc_AMAOTr	SCc_ANPRT	SCc_ANTHt	SCc_APRAUR	SCc_ARGt	SCc_ASAD	SCc_ASNt	SCc_ASPCT	SCc_ASPt2	SCc_ATPM	SCc_ATPS4r	SCc_BPNT	SCc_BTNt	SCc_BTS5	SCc_Biomass_whith_wall_SCc	SCc_C120SN	SCc_C140SN	SCc_C141SN	SCc_C160SN	SCc_C161SN	SCc_C181SN	SCc_CBPS	SCc_CDPMEK	SCc_CHORS	SCc_CLPNS_SCc	SCc_CO2t	SCc_CPPPGO	SCc_CTPS2	SCc_CYSS	SCc_CYSt
R	6.30519	0	0	0	0	16.5989	0	20.2176	2.08977	2.08977	18.3188	3.61869	0	0	0	0	0	0	0	0	0	0	0	0	0	0	0	0	0	24.9559	3.61869	0	0	0	0	0	0	0	0	0	0	0	2.08977	0	29.0536	0	0	3.61869	3.61869
SCc_SHK3Dr	6.15791	0	0	0	0	16.399	0	20.2849	2.18776	2.18776	18.3895	3.88589	0	0	0	0	0	0	0	0	0	0	0	0	0	0	0	0	0	24.5582	3.88589	0	0	0	0	0	0	0	0	0	0	0	2.18776	0	29.1506	0	0	3.88589	3.88589
SCc_DHFS	5.89767	0	0	0	0	15.7835	0	20.9304	0	0	16.9423	5.14693	0	0	0	0	0	0	0	0	0	0	0	0	0	0	0	0	3.90416	27.5467	5.14693	0	0	0	0	0	0	0	0	0	0	0	2.19134	0	32.32	0	0	5.14693	5.14693
SCc_SHKK	5.73177	0	0	0	0	15.4236	0	22.7668	0.720541	0.720541	19.5273	7.34322	0	0	0	0	0	0	0	0	0	0	0	0	0	0	0	0	0	27.7347	7.34322	0	0	0	0	0	0	0	0	0	0	0	0	0	37.8136	0	0	7.34322	7.34322
SCc_SHK3Dr_&_SCc_SHKK	5.73177	0	0	0	0	15.4236	0	22.7668	0.720541	0.720541	19.5273	7.34322	0	0	0	0	0	0	0	0	0	0	0	0	0	0	0	0	0	27.7347	7.34322	0	0	0	0	0	0	0	0	0	0	0	0	0	37.8136	0	0	7.34322	7.34322
SCc_SHK3Dr_&_BCc_SHKK	5.63706	0	0	0	0	16.5832	0	17.2717	1.52617	1.52617	13.4889	0.688574	0	0	0	0	0	0	0	0	0	0	0	0	0	0	0	0	0	22.1271	0.688574	0	0	0	0	0	0	0	0	0	0	0	5.63706	0	19.412	0	0	0.688574	0.688574
BCc_SHKK	5.63706	0	0	0	0	16.5832	0	17.2717	1.52617	1.52617	13.4889	0.688574	0	0	0	0	0	0	0	0	0	0	0	0	0	0	0	0	0	22.1271	0.688574	0	0	0	0	0	0	0	0	0	0	0	5.63706	0	19.412	0	0	0.688574	0.688574
SCc_SHKK_&_SCc_DHFS	5.58849	0	0	0	0	14.6851	0	20.9078	0	0	17.3997	6.22271	0	0	0	0	0	0	0	0	0	0	0	0	0	0	0	0	1.26614	27.0731	6.22271	0	0	0	0	0	0	0	0	0	0	0	0	0	34.8423	0	0	6.22271	6.22271
BCc_SHKK_&_SCc_DHFS	5.39845	0	0	0	0	14.8901	0	17.4029	0	0	13.3097	2.51276	0	0	0	0	0	0	0	0	0	0	0	0	0	0	0	0	0	23.6293	2.51276	0	0	0	0	0	0	0	0	0	0	0	5.39845	0	22.6948	0	0	2.51276	2.51276
SCc_SHK3Dr_&_SCc_SHKK_&_SCc_DHFS	5.37634	0	0	0	0	13.7097	0	20.6989	0	0	17.7419	6.98925	0	0	0	0	0	0	0	0	0	0	0	0	0	0	0	0	0	25.8065	6.98925	0	0	0	0	0	0	0	0	0	0	0	0	0	34.6774	0	0	6.98925	6.98925
SCc_SHK3Dr_&_SCc_DHFS	5.37634	0	0	0	0	13.7097	0	20.6989	0	0	17.7419	6.98925	0	0	0	0	0	0	0	0	0	0	0	0	0	0	0	0	0	25.8065	6.98925	0	0	0	0	0	0	0	0	0	0	0	0	0	34.6774	0	0	6.98925	6.98925
SCc_SHK3Dr_&_BCc_SHKK_&_SCc_DHFS	5.26316	0	0	0	0	13.1579	0	15.7895	0	0	13.1579	2.63158	0	0	0	0	0	0	0	0	0	0	0	0	0	0	0	0	3.28947	21.7105	2.63158	0	0	0	0	0	0	0	0	0	0	0	5.26316	0	21.0526	0	0	2.63158	2.63158
BCc_SHK3Dr	5.21078	0	0	0	0	24.6702	0	24.6702	0.12877	0.12877	10.5503	0	0	0	0	0	0	0	0	0	0	0	0	0	0	0	0	0	40.5238	30.8536	0	0	0	0	0	0	0	0	0	0	0	0	2.80837	0	27.3399	0	0	0	0
BCc_SHK3Dr_&_SCc_DHFS	5.20073	0	0	0	0	24.6655	0	24.6655	0	0	10.4015	0	0	0	0	0	0	0	0	0	0	0	0	0	0	0	0	0	40.9196	30.9896	0	0	0	0	0	0	0	0	0	0	0	0	2.99574	0	27.2658	0	0	0	0
BCc_SHK3Dr_&_SCc_SHKK_&_SCc_DHFS	5.07358	0	0	0	0	20.0721	0	23.2756	0	0	13.3507	3.20351	0	0	0	0	0	0	0	0	0	0	0	0	0	0	0	0	24.1686	29.1501	3.20351	0	0	0	0	0	0	0	0	0	0	0	0	0	32.2194	0	0	3.20351	3.20351
BCc_SHK3Dr_&_SCc_SHKK	5.07358	0	0	0	0	20.0721	0	23.2756	0	0	13.3507	3.20351	0	0	0	0	0	0	0	0	0	0	0	0	0	0	0	0	24.1686	29.1501	3.20351	0	0	0	0	0	0	0	0	0	0	0	0	0	32.2194	0	0	3.20351	3.20351
BCc_SHK3Dr_&_BCc_SHKK	4.87805	0	0	0	0	25.2033	0	25.2033	0	0	9.7561	0	0	0	0	0	0	0	0	0	0	0	0	0	0	0	0	0	43.2927	31.9106	0	0	0	0	0	0	0	0	0	0	0	0	4.87805	0	27.6423	0	0	0	0
BCc_SHK3Dr_&_BCc_SHKK_&_SCc_DHFS	4.87805	0	0	0	0	25.2033	0	25.2033	0	0	9.7561	0	0	0	0	0	0	0	0	0	0	0	0	0	0	0	0	0	43.2927	31.9106	0	0	0	0	0	0	0	0	0	0	0	0	4.87805	0	27.6423	0	0	0	0
SCc_SHK3Dr_&_BCc_DHFS	4.75483	0	0	0	0	17.5334	0	19.6137	4.75483	4.75483	16.3447	2.08024	0	0	0	0	0	0	0	0	0	0	0	0	0	0	0	0	3.19465	21.9168	2.08024	0	0	0	0	0	0	0	0	0	0	0	4.75483	0	26.1516	0	0	2.08024	2.08024
SCc_SHK3Dr_&_BCc_SHKK_&_BCc_DHFS	4.75483	0	0	0	0	17.5334	0	19.6137	4.75483	4.75483	16.3447	2.08024	0	0	0	0	0	0	0	0	0	0	0	0	0	0	0	0	0	21.9168	2.08024	0	0	0	0	0	0	0	0	0	0	0	4.75483	0	26.1516	0	0	2.08024	2.08024
BCc_SHKK_&_BCc_DHFS	4.75483	0	0	0	0	17.5334	0	19.6137	4.75483	4.75483	16.3447	2.08024	0	0	0	0	0	0	0	0	0	0	0	0	0	0	0	0	0	21.9168	2.08024	0	0	0	0	0	0	0	0	0	0	0	4.75483	0	26.1516	0	0	2.08024	2.08024
BCc_DHFS	4.75483	0	0	0	0	17.5334	0	19.6137	4.75483	4.75483	16.3447	2.08024	0	0	0	0	0	0	0	0	0	0	0	0	0	0	0	0	3.19465	21.9168	2.08024	0	0	0	0	0	0	0	0	0	0	0	4.75483	0	26.1516	0	0	2.08024	2.08024
BCc_SHK3Dr_&_BCc_SHKK_&_BCc_DHFS	4.25532	0	0	0	0	26.9504	0	26.9504	4.25532	4.25532	12.766	0	0	0	0	0	0	0	0	0	0	0	0	0	0	0	0	0	37.234	30.1418	0	0	0	0	0	0	0	0	0	0	0	0	4.25532	0	31.2057	0	0	0	0
BCc_SHK3Dr_&_BCc_DHFS	4.25532	0	0	0	0	26.9504	0	26.9504	4.25532	4.25532	12.766	0	0	0	0	0	0	0	0	0	0	0	0	0	0	0	0	0	0	30.1418	0	0	0	0	0	0	0	0	0	0	0	0	4.25532	0	31.2057	0	0	0	0
SCc_SHK3Dr_&_SCc_SHKK_&_BCc_DHFS	4.21622	0	0	0	0	15.4073	0	20.1363	4.21622	4.21622	17.3777	4.72901	0	0	0	0	0	0	0	0	0	0	0	0	0	0	0	0	0	21.3185	4.72901	0	0	0	0	0	0	0	0	0	0	0	0	0	31.7024	0	0	4.72901	4.72901
SCc_SHKK_&_BCc_DHFS	4.21622	0	0	0	0	15.4073	0	20.1363	4.21622	4.21622	17.3777	4.72901	0	0	0	0	0	0	0	0	0	0	0	0	0	0	0	0	0	21.3185	4.72901	0	0	0	0	0	0	0	0	0	0	0	0	0	31.7024	0	0	4.72901	4.72901
BCc_SHK3Dr_&_SCc_SHKK_&_BCc_DHFS	3.55855	0	0	0	0	18.0973	0	20.7422	3.55855	3.55855	13.3205	2.64487	0	0	0	0	0	0	0	0	0	0	0	0	0	0	0	0	0	22.7378	2.64487	0	0	0	0	0	0	0	0	0	0	0	0	0	29.5904	0	0	2.64487	2.64487
BCc_SHKK_&_SCc_SHKK_&_BCc_DHFS	0	0	0	0	0	0	0	0	0	0	0	0	0	0	0	0	0	0	0	0	0	0	0	0	0	0	0	0	0	0	0	0	0	0	0	0	0	0	0	0	0	0	0	0	0	0	0	0	0
SCc_SHK3Dr_&_BCc_DHFS_&_SCc_DHFS	0	0	0	0	0	0	0	0	0	0	0	0	0	0	0	0	0	0	0	0	0	0	0	0	0	0	0	0	0	0	0	0	0	0	0	0	0	0	0	0	0	0	0	0	0	0	0	0	0
SCc_SHK3Dr_&_BCc_SHKK_&_SCc_SHKK	0	0	0	0	0	0	0	0	0	0	0	0	0	0	0	0	0	0	0	0	0	0	0	0	0	0	0	0	0	0	0	0	0	0	0	0	0	0	0	0	0	0	0	0	0	0	0	0	0
BCc_SHKK_&_BCc_DHFS_&_SCc_DHFS	0	0	0	0	0	0	0	0	0	0	0	0	0	0	0	0	0	0	0	0	0	0	0	0	0	0	0	0	0	0	0	0	0	0	0	0	0	0	0	0	0	0	0	0	0	0	0	0	0
BCc_SHKK_&_SCc_SHKK_&_SCc_DHFS	0	0	0	0	0	0	0	0	0	0	0	0	0	0	0	0	0	0	0	0	0	0	0	0	0	0	0	0	0	0	0	0	0	0	0	0	0	0	0	0	0	0	0	0	0	0	0	0	0
BCc_DHFS_&_SCc_DHFS	0	0	0	0	0	0	0	0	0	0	0	0	0	0	0	0	0	0	0	0	0	0	0	0	0	0	0	0	0	0	0	0	0	0	0	0	0	0	0	0	0	0	0	0	0	0	0	0	0
BCc_SHK3Dr_&_BCc_DHFS_&_SCc_DHFS	0	0	0	0	0	0	0	0	0	0	0	0	0	0	0	0	0	0	0	0	0	0	0	0	0	0	0	0	0	0	0	0	0	0	0	0	0	0	0	0	0	0	0	0	0	0	0	0	0
BCc_SHK3Dr_&_BCc_SHKK_&_SCc_SHKK	0	0	0	0	0	0	0	0	0	0	0	0	0	0	0	0	0	0	0	0	0	0	0	0	0	0	0	0	0	0	0	0	0	0	0	0	0	0	0	0	0	0	0	0	0	0	0	0	0
BCc_SHK3Dr_&_SCc_SHK3Dr_&_SCc_DHFS	0	0	0	0	0	0	0	0	0	0	0	0	0	0	0	0	0	0	0	0	0	0	0	0	0	0	0	0	0	0	0	0	0	0	0	0	0	0	0	0	0	0	0	0	0	0	0	0	0
BCc_SHK3Dr_&_SCc_SHK3Dr_&_BCc_DHFS	0	0	0	0	0	0	0	0	0	0	0	0	0	0	0	0	0	0	0	0	0	0	0	0	0	0	0	0	0	0	0	0	0	0	0	0	0	0	0	0	0	0	0	0	0	0	0	0	0
BCc_SHK3Dr_&_SCc_SHK3Dr_&_SCc_SHKK	0	0	0	0	0	0	0	0	0	0	0	0	0	0	0	0	0	0	0	0	0	0	0	0	0	0	0	0	0	0	0	0	0	0	0	0	0	0	0	0	0	0	0	0	0	0	0	0	0
BCc_SHK3Dr_&_SCc_SHK3Dr_&_BCc_SHKK	0	0	0	0	0	0	0	0	0	0	0	0	0	0	0	0	0	0	0	0	0	0	0	0	0	0	0	0	0	0	0	0	0	0	0	0	0	0	0	0	0	0	0	0	0	0	0	0	0
BCc_SHKK_&_SCc_SHKK	0	0	0	0	0	0	0	0	0	0	0	0	0	0	0	0	0	0	0	0	0	0	0	0	0	0	0	0	0	0	0	0	0	0	0	0	0	0	0	0	0	0	0	0	0	0	0	0	0
BCc_SHK3Dr_&_SCc_SHK3Dr	0	0	0	0	0	0	0	0	0	0	0	0	0	0	0	0	0	0	0	0	0	0	0	0	0	0	0	0	0	0	0	0	0	0	0	0	0	0	0	0	0	0	0	0	0	0	0	0	0
SCc_SHKK_&_BCc_DHFS_&_SCc_DHFS	0	0	0	0	0	0	0	0	0	0	0	0	0	0	0	0	0	0	0	0	0	0	0	0	0	0	0	0	0	0	0	0	0	0	0	0	0	0	0	0	0	0	0	0	0	0	0	0	0
[truncated: 545 more columns]

## Sheet: Biotin_experiment
ID	fOpt	pfOpt	lostGenes	pLostGenes	SCc_4PASPt	SCc_8AONNt	SCc_A5PISO	SCc_ACCOACr	SCc_ACKr	SCc_ACOATA	SCc_ACt	SCc_ADCL	SCc_ADCS	SCc_ADK1	SCc_ADSK	SCc_ADSL1r	SCc_ADSS	SCc_AGMHE	SCc_4AMPMt	SCc_AKGt	SCc_ALAALAr	SCc_ALAt	SCc_AMAOTr	SCc_ANPRT	SCc_ANTHt	SCc_APRAUR	SCc_ARGt	SCc_ASAD	SCc_ASNt	SCc_ASPCT	SCc_ASPt2	SCc_ATPM	SCc_ATPS4r	SCc_BPNT	SCc_BTNt	SCc_BTS5	SCc_Biomass_whith_wall_SCc	SCc_C120SN	SCc_C140SN	SCc_C141SN	SCc_C160SN	SCc_C161SN	SCc_C181SN	SCc_CBPS	SCc_CDPMEK	SCc_CHORS	SCc_CLPNS_SCc	SCc_CO2t	SCc_CPPPGO
R	3.78582	100	0	0	0	-2.85178	0	8.55534	11.042	0	19.5477	0	0	17.9951	12.2915	2.85178	2.85178	0	0	0	0	2.85178	0	0	0	0	0	0	2.85178	0	0	0	29.9835	12.2915	0	0	0	0	0	0	0	0	0	0	0	0	0	55.5378	0
SCc_BTS5	3.78582	100	2	14.2857	0	-2.85178	0	8.55534	11.042	0	19.5477	0	0	17.9951	12.2915	2.85178	2.85178	0	0	0	0	2.85178	0	0	0	0	0	0	2.85178	0	0	0	29.9835	12.2915	0	0	0	0	0	0	0	0	0	0	0	0	0	55.5378	0
BCc_AOXSr2	3.40426	89.9212	5	35.7143	0	-3.40426	0	10.2128	9.92908	0	16.7376	0	0	17.0213	10.2128	3.40426	3.40426	0	0	0	0	3.40426	0	0	0	0	0	0	3.40426	0	0	0	27.8014	10.2128	0	0	0	0	0	0	0	0	0	0	0	0	0	50.7801	0
BCc_AOXSr2_&_SCc_BTS5	3.40426	89.9212	7	50	0	-3.40426	0	10.2128	9.92908	0	16.7376	0	0	17.0213	10.2128	3.40426	3.40426	0	0	0	0	3.40426	0	0	0	0	0	0	3.40426	0	0	0	27.8014	10.2128	0	0	0	0	0	0	0	0	0	0	0	0	0	50.7801	0
BCc_BTS5	2.74617	72.5382	2	14.2857	0	2.12766	0	1.85552	11.4877	0	16.98	0	0	13.7308	8.2385	2.74617	2.74617	0	0	0	0	0.618506	2.74617	0	0	0	0	0	2.74617	0	0	0	18.2171	8.2385	0	2.74617	0	0	0	0	0	0	0	0	0	0	0	33.1849	0
BCc_AOXSr2_&_BCc_BTS5	2.32558	61.4287	7	50	0	0	0	6.97674	8.52713	0	13.1783	0	0	11.6279	6.97674	2.32558	2.32558	0	0	0	0	2.32558	2.32558	0	0	0	0	0	2.32558	0	0	0	17.8295	6.97674	0	2.32558	0	0	0	0	0	0	0	0	0	0	0	34.1085	0
SCc_AOXSr2	2.18341	57.6732	5	35.7143	0	1.74672	0	0	9.13392	0	13.5007	0	0	10.917	6.55022	2.18341	2.18341	0	0	0	0	0	1.74672	0	0	0	0	0	2.18341	0	0	0	14.0466	6.55022	0	1.74672	0	0	0	0	0	0	0	0	0	0	0	24.8544	0
SCc_AOXSr2_&_BCc_BTS5	2.12766	56.2007	7	50	0	2.12766	0	0	9.39716	0	13.6525	0	0	10.6383	6.38298	2.12766	2.12766	0	0	0	0	0	2.12766	0	0	0	0	0	0	0	2.12766	0	13.1206	6.38298	0	2.12766	0	0	0	0	0	0	0	0	0	0	0	24.2908	0
SCc_AOXSr2_&_SCc_BTS5	1.79641	47.4509	7	50	0	0	0	0	6.58683	0	10.1796	0	0	8.98204	5.38922	1.79641	1.79641	0	0	0	0	0	0	0	0	0	0	0	0	0	1.79641	0	11.976	5.38922	0	0	0	0	0	0	0	0	0	0	0	0	0	20.9581	0
BCc_AOXSr2_&_SCc_AOXSr2	0	0	10	71.4286	0	0	0	0	0	0	0	0	0	0	0	0	0	0	0	0	0	0	0	0	0	0	0	0	0	0	0	0	0	0	0	0	0	0	0	0	0	0	0	0	0	0	0	0	0
BCc_BTS5_&_SCc_BTS5	0	0	4	28.5714	0	0	0	0	0	0	0	0	0	0	0	0	0	0	0	0	0	0	0	0	0	0	0	0	0	0	0	0	0	0	0	0	0	0	0	0	0	0	0	0	0	0	0	0	0
[truncated: 543 more columns]
